# Supplementary material
Source: PubMed Central journal article supplement (PMC7497645)
Supplement: ja9b13769_si_001.pdf [file ja9b13769_si_001.pdf]

# On the Impact of Excited State Antiaromaticity Relief in a Fundamental Benzene Photoreaction Leading to Substituted Bicyclo[3.1.0]hexenes

Tomáš Slanina,<sup>1,2</sup> Rabia Ayub,<sup>1,‡</sup> Josene Toldo,<sup>1,‡</sup> Johan Sundell,<sup>3</sup> Wangchuk Rabten,<sup>1</sup> Marco Nicaso,<sup>1</sup> Igor Alabugin,<sup>4</sup> Ignacio Fdez. Galván,<sup>5</sup> Arvind K. Gupta,<sup>1</sup> Roland Lindh,<sup>5,6</sup> Andreas Orthaber,<sup>1</sup> Richard J. Lewis,<sup>7</sup> Gunnar Grönberg,<sup>7</sup> Joakim Bergman<sup>3,\*</sup> and Henrik Ottosson<sup>1,\*</sup>

<sup>1</sup> Department of Chemistry – Ångström Laboratory, Uppsala University, SE-751 20, Uppsala, Sweden. <sup>2</sup> Institute of Organic Chemistry and Biochemistry of the Czech Academy of Sciences, Flemingovo náměstí 2, 16610 Prague 6, Czech Republic <sup>3</sup> Medicinal Chemistry, Research and Early Development Cardiovascular, Renal and Metabolism, BioPharmaceuticals R&D, AstraZeneca, Gothenburg, Sweden. <sup>4</sup> Department of Chemistry and Biochemistry, Florida State University, Tallahassee, FL 32306-4390, USA, <sup>5</sup> Department of Chemistry – BMC, Uppsala University, 751 23, Uppsala, Sweden, <sup>6</sup> Uppsala Center for Computational Chemistry – UC<sub>3</sub>, Uppsala University, 751 23, Uppsala Sweden, <sup>7</sup> Medicinal Chemistry, Research and Early Development Respiratory, Inflammation and Autoimmune, BioPharmaceutical R&D, AstraZeneca Gothenburg, Sweden.

<sup>‡</sup> These authors contributed equally.

## Table of contents

|                                                      |          |
|------------------------------------------------------|----------|
| <b>1. Materials and Methods</b> .....                | <b>3</b> |
| 1.1 General information .....                        | 3        |
| 1.2 Bulk irradiation.....                            | 4        |
| 1.3 Irradiation in tubing reactors .....             | 4        |
| <b>2. Optimization and control experiments</b> ..... | <b>5</b> |

|                                                                                                                                                         |           |
|---------------------------------------------------------------------------------------------------------------------------------------------------------|-----------|
| 2.1 Control experiments .....                                                                                                                           | 5         |
| 2.2 Optimization experiments TMS-benzene .....                                                                                                          | 5         |
| 2.3 Reactivity scope .....                                                                                                                              | 6         |
| 2.4 Reactivity of phenyl silanes .....                                                                                                                  | 9         |
| <b>3. Synthesis of the products .....</b>                                                                                                               | <b>11</b> |
| 3.1 Product purity and separation.....                                                                                                                  | 11        |
| 3.2 (±)-((1 <i>S</i> ,4 <i>S</i> ,5 <i>S</i> ,6 <i>R</i> )-4-methoxybicyclo[3.1.0]hex-2-en-6-yl)trimethylsilane (±)- <b>1d</b> .....                    | 12        |
| 3.3 (±)-((1 <i>R</i> ,2 <i>R</i> ,5 <i>S</i> )-2-methoxybicyclo[3.1.0]hex-3-en-1-yl)trimethylsilane (±)- <b>1e</b> .....                                | 15        |
| 3.4 (±)-( <i>1R</i> ,4 <i>S</i> ,5 <i>S</i> )-1-( <i>tert</i> -butyl)-4-methoxybicyclo[3.1.0]hex-2-ene, (±)- <b>1c</b> .....                            | 18        |
| 3.5 (±)-( <i>1S</i> ,2 <i>S</i> ,5 <i>S</i> )-bicyclo[3.1.0]hex-3-en-2-ol, (±)- <b>1a</b> .....                                                         | 23        |
| 3.6 (±)-( <i>1S</i> ,2 <i>S</i> ,5 <i>S</i> )-bicyclo[3.1.0]hex-3-en-2-yl acetate, (±)- <b>1b</b> .....                                                 | 24        |
| 3.7 (±)-( <i>1S</i> ,2 <i>S</i> ,5 <i>S</i> )-bicyclo[3.1.0]hex-3-en-2-yl ( <i>tert</i> -butoxycarbonyl)- <i>L</i> -phenylalaninate, (±)- <b>7</b> .... | 24        |
| 3.8 Chiral separation.....                                                                                                                              | 26        |
| 3.9 Structural NMR characterization of the isolated diastereomers .....                                                                                 | 27        |
| 3.10 Vibrational circular dichroism analysis.....                                                                                                       | 35        |
| 3.11 X-ray crystallography analysis .....                                                                                                               | 39        |
| <b>4. Reactivity of prepared bicyclic structures.....</b>                                                                                               | <b>59</b> |
| 4.1 Epimerization study (photoequilibration).....                                                                                                       | 59        |
| 4.2 Replacement of silyl group by TBAF .....                                                                                                            | 60        |
| 4.3 Demethylation .....                                                                                                                                 | 61        |
| 4.4 Enzymatic esterification .....                                                                                                                      | 63        |
| <b>5. Mechanistic experiments .....</b>                                                                                                                 | <b>64</b> |
| 5.1 Fluorescence quenching .....                                                                                                                        | 64        |
| 5.2 Stern Volmer analysis calculations .....                                                                                                            | 66        |
| 5.3 Deuterium experiments .....                                                                                                                         | 67        |
| 5.4 Approximation of the concentration of excited molecules in a typical irradiation experiment ..                                                      | 69        |
| 5.5 Estimation of the concentration of benzvalene at photostationary state.....                                                                         | 69        |
| <b>6. Pyridinium, pyrylium ion and silabenzene photochemical rearrangement .....</b>                                                                    | <b>69</b> |
| <b>7. Computational part.....</b>                                                                                                                       | <b>71</b> |
| 7.1 Computational details: DFT calculations .....                                                                                                       | 71        |
| 7.2 Computational details: Calculations using multiconfigurational methods:.....                                                                        | 72        |
| 7.3 Computational details: Aromaticity indices (NMR chemical shifts and electronic indices).....                                                        | 73        |
| 7.4 Geometries, Cartesian coordinates, and energies .....                                                                                               | 75        |
| 7.5 Protonation of benzene .....                                                                                                                        | 79        |
| 7.6 Rationalization of the barrier in the S <sub>1</sub> state.....                                                                                     | 99        |

|                                                                               |            |
|-------------------------------------------------------------------------------|------------|
| 7.7 Aromaticity index (NICS(1) <sub>zz</sub> , MCI and FLU values) .....      | 100        |
| 7.8 Approximate estimate of the S <sub>1</sub> state ESAA relief energy ..... | 104        |
| 7.9 Protonation of benzene and COT .....                                      | 105        |
| 7.10 Proton affinities .....                                                  | 107        |
| <b>8. Spectra</b> .....                                                       | <b>108</b> |
| <b>9. References</b> .....                                                    | <b>129</b> |

## 1. Materials and Methods

### 1.1 General information

All reagents and solvents were purchased from TCI, Acros Organics (Thermofisher) and Sigma Aldrich (Merck) and were used as received. HPLC grade solvents were used for irradiation experiments and technical grade solvents were used for column chromatography and other reactions. Silica-precoated aluminium sheets containing fluorescent indicator from Sigma Aldrich were used for TLC. Visualization was done with UV light (254 and 365 nm) or with cerium molybdate (Hanessian's) stain. NMR spectra were recorded on a JEOL (400YH magnet) Resonance 400 MHz spectrometer. Chemical shifts  $\delta$  are reported in ppm and coupling constants  $J$  in Hz. <sup>1</sup>H NMR and <sup>13</sup>C NMR chemical shifts are referenced to the residual protic solvent signal. The values used therefore were: CDCl<sub>3</sub> <sup>1</sup>H 7.26 ppm, <sup>13</sup>C 77.16 ppm. Deuterated solvents were used for sample preparation directly without purification. Chemical shifts ( $\delta$ ) are reported on a ppm scale. The following abbreviations (or combinations thereof) were used to describe multiplicities: s = singlet, d = doublet, t = triplet, q = quartet, m = multiplet, br = broad. Coupling constants ( $J$ ) are reported in Hertz (Hz). Mass spectrometry was performed on a GCT Premier Mass TOF spectrometer coupled with gas chromatograph.

UV/vis spectra and fluorescence spectra were measured in a 1.0 cm quartz fluorescence cuvette.

Degassed samples were measured in 1.0 cm quartz fluorescence with a screw cap with a PTFE septum. The solutions were degassed by bubbling with argon by a glass capillary (metal needles were omitted as they partially dissolved in highly acidic solutions contaminating the sample with ferric ions acting as optical filter).

### 1.2 Bulk irradiation

A typical photochemical reaction was accomplished in a Rayonet® reactor equipped with 16 UV lamps RPR-2437Å. The light intensity in the irradiated area was approximately  $1.65 \times 10^{16}$  photons  $s^{-1} cm^{-3}$ . The samples were irradiated in quartz tubes (15 or 60 mL) equipped with a stirring bar and covered with a rubber septum which was sealed by parafilm and covered in aluminium foil which were degassed by bubbling by argon if needed. The irradiation chamber was cooled by a fan to temperature of  $\sim 35^{\circ}C$ .

### 1.3 Irradiation in tubing reactors

The samples were irradiated in FEP (fluorinated ethylene propylene) tubing which is transparent for 254 nm light. The tubing was wound around a light source (254 nm lamp) and was either irradiated in a flow regime (pumped by gravity when the flow was adjusted by a valve between the reservoir and the tubing coil) or was loaded in the tube and irradiated without the flow.



## 2. Optimization and control experiments

### 2.1 Control experiments

The photoreaction has been tested by a series of control experiments confirming that all components are needed for the efficient product formation. Photorearrangement of TMS-benzene in methanol catalysed by DCA has been chosen as a model reaction. The results are summarized in Table S1. It was concluded that degassing does not significantly influence the course of the reaction (entries 1 and 2), light of a proper wavelength (entries 3 and 5) is needed for the reaction and that acid catalyses the reaction (entry 4). The reaction in neat substrate with added methanol as nucleophilic reagent yielded traces of product (entry 6).

**Table S1:** Control experiments of a model rearrangement reaction

| Entry | TMS benzene<br>[ $\mu\text{mol}$ ] | DCA<br>[ $\mu\text{mol}$ ] | Irradiation <sup>a</sup><br>[h] | MeOH<br>[mL] | Degassed         | Yield <sup>b</sup> [%] |
|-------|------------------------------------|----------------------------|---------------------------------|--------------|------------------|------------------------|
| 1     | 832                                | 15                         | 2                               | 12           | yes <sup>c</sup> | 30                     |
| 2     | 832                                | 15                         | 2                               | 12           | no               | 28                     |
| 3     | 832                                | 15                         | 0 <sup>d</sup>                  | 12           | no               | 0                      |
| 4     | 832                                | 0                          | 2                               | 12           | no               | 7                      |
| 5     | 832                                | 15                         | 2 <sup>e</sup>                  | 12           | no               | 0                      |
| 6     | 83200                              | 15                         | 2                               | 1            | no               | 2                      |

<sup>a</sup> Irradiated by 254 nm light. <sup>b</sup> NMR yield of the reaction mixture of the test run, not complete conversion. <sup>c</sup> Degassed by bubbling with argon for 10 min. <sup>d</sup> Stirred in dark for 2 hours. <sup>e</sup> Irradiated by 365 nm light.

### 2.2 Optimization experiments TMS-benzene

The strength and amount of the acid which was found to catalyse the reaction was optimized in a series of experiments. Photorearrangement of TMS-benzene in methanol has been chosen for

the optimization. The results are shown in Table S2. Strong acids catalyse the reaction but lead to the formation of by-products (entry 1), weak acids do not catalyse the reaction as efficiently (entry 3). Dichloroacetic acid (DCA) was found to have optimal strength which catalyses the reaction but does not lead to by-products (polymers etc.). The optimal acid loading was found to be approx. 2 mol% (entries 4 – 9). The reaction in a flow apparatus was found to be more efficient (less secondary photoproducts, entry 10).

**Table S2:** Optimization of a model rearrangement reaction.<sup>a</sup>

| Entry | Acid                           | $x_{\text{acid}}$ [%] | Reaction type <sup>b</sup> | Yield <sup>c</sup> [%] |
|-------|--------------------------------|-----------------------|----------------------------|------------------------|
| 1     | H <sub>3</sub> PO <sub>4</sub> | 1.8                   | batch                      | 3                      |
| 2     | HCl                            | 1.8                   | batch                      | 18                     |
| 3     | AcOH                           | 1.8                   | batch                      | 7                      |
| 4     | DCA                            | 1.8                   | batch                      | 28                     |
| 5     | DCA                            | 4                     | batch                      | 27                     |
| 6     | DCA                            | 9                     | batch                      | 25                     |
| 7     | DCA                            | 18                    | batch                      | 9                      |
| 8     | DCA                            | 40                    | batch                      | 1                      |
| 9     | DCA                            | 90                    | batch                      | 0                      |
| 10    | DCA                            | 1.8                   | flow                       | 45                     |

<sup>a</sup> Typical reaction conditions: TMS benzene (832  $\mu\text{mol}$ ), MeOH (12 mL), non-degassed, irradiated for 2 h at 254 nm. <sup>b</sup> batch = quartz test tube with stir bar, flow = FEP tubing reactor.

<sup>c</sup> NMR yield, not complete conversion.

### 2.3 Reactivity scope

The photorearrangement reaction has been tested on a series of aromatic compounds (Scheme S1). As it was known that the reaction does not tolerate many functional groups, substrates with simple and “inert” functional groups were tested. As the reaction generates often mixtures of

tens of different isomers, the reaction output is only briefly commented in Table S3 and only few examples have been chosen for further optimization, separation and synthetic modifications.

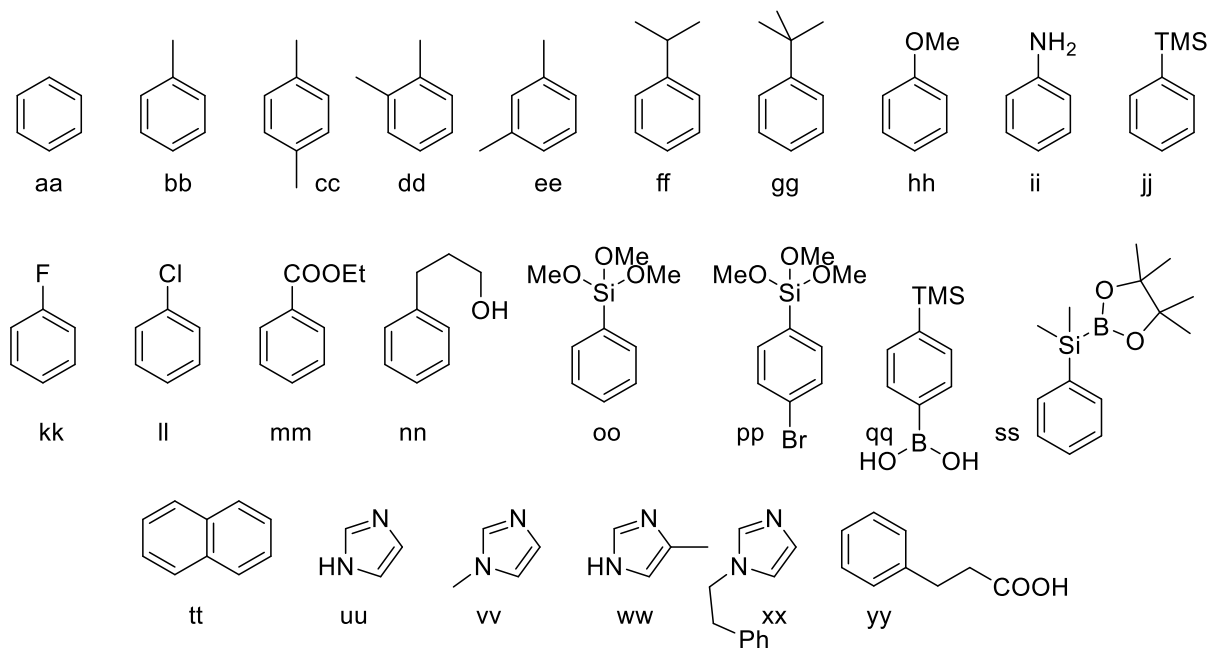

**Scheme S1:** Structures of substrates for the model photoreaction.

**Table S3:** Tested substrates, reaction conditions and output of the studied photoreaction.

| Entry | Substrate | Conditions <sup>a</sup>                 | Output                                                                                                                                 |
|-------|-----------|-----------------------------------------|----------------------------------------------------------------------------------------------------------------------------------------|
| 1     | aa        | MeOH/DCA                                | Mixture of ~bicyclic adducts, competing polymerization and decomposition, products decompose on the column                             |
| 2     | aa        | H <sub>2</sub> O/HOAc                   | Hydroxy adduct <b>1a</b> (69%), clean reaction, formation of insoluble precipitate at high (>~60%) conversions                         |
| 3     | aa        | H <sub>2</sub> O/HOAc/MeCN <sup>b</sup> | Analogous to entry 2, complicated separation of the product by extraction                                                              |
| 4     | aa        | H <sub>2</sub> O/HCl                    | Hydroxy adduct <b>1a</b> (32%), competing decomposition of the product, formation of insoluble precipitate at high (>~40%) conversions |

|    |    |                       |                                                                                       |
|----|----|-----------------------|---------------------------------------------------------------------------------------|
|    | aa | MeOH                  | Mixture of >5 bicyclic products, competing polymerization and degradation             |
| 5  | aa | HOAc <sup>c</sup>     | Acetate adduct <b>1b</b> (25%), mixture of ~3 minor by-products                       |
| 6  | bb | MeOH/DCA              | Mixture of >5 products                                                                |
| 7  | bb | H <sub>2</sub> O/HOAc | Immiscible with the solvent, no conversion                                            |
| 8  | cc | MeOH/DCA              | Mixture of >5 products                                                                |
| 9  | cc | H <sub>2</sub> O/HOAc | Immiscible with the solvent, no conversion                                            |
| 10 | dd | MeOH/DCA              | Mixture of >5 products                                                                |
| 11 | dd | H <sub>2</sub> O/HOAc | Immiscible with the solvent, no conversion                                            |
| 12 | ee | MeOH/DCA              | Mixture of >5 products                                                                |
| 13 | ee | H <sub>2</sub> O/HOAc | Immiscible with the solvent, no conversion                                            |
| 14 | ff | MeOH/DCA              | Mixture of ~4 bicyclic products                                                       |
| 15 | gg | MeOH/DCA              | Methoxy adduct <b>1c</b> (52%), 3 minor by-products                                   |
| 16 | hh | MeOH/DCA              | No reaction                                                                           |
| 17 | ii | MeOH/DCA              | decomposition                                                                         |
| 18 | jj | MeOH/DCA              | Methoxy adduct <b>1d</b> (75%), 2 minor bicyclic by-products                          |
| 19 | jj | MeOH/HCl              | Methoxy adduct <b>1d</b> (48%), 2 minor bicyclic by-products, competing decomposition |
| 20 | jj | MeOH/HOAc             | Methoxy adduct <b>1d</b> (11%), 2 minor bicyclic by-products                          |
| 21 | jj | MeOH                  | Methoxy adduct <b>1d</b> (9%), 2 minor bicyclic by-products                           |
| 22 | kk | MeOH/DCA              | Mixture of >5 products                                                                |
| 23 | ll | MeOH/DCA              | Mixture of >5 products                                                                |
| 24 | mm | H <sub>2</sub> O/HOAc | No reaction                                                                           |
| 25 | nn | MeOH/DCA              | Mixture of ~4 bicyclic products                                                       |
| 26 | nn | MeCN/HCl              | No reaction                                                                           |
| 27 | oo | MeOH/DCA              | Mixture of ~4 bicyclic products                                                       |
| 28 | pp | MeOH/DCA              | Decomposition                                                                         |
| 29 | qq | MeOH/DCA              | Decomposition                                                                         |
| 30 | ss | MeOH/DCA              | Mixture of ~4 bicyclic products                                                       |
| 31 | tt | MeOH/HCl              | No reaction                                                                           |
| 32 | uu | MeOH/HCl              | No reaction                                                                           |

|    |    |          |                                 |
|----|----|----------|---------------------------------|
| 33 | vv | MeOH/HCl | No reaction                     |
| 34 | ww | MeOH/HCl | No reaction                     |
| 35 | xx | MeOH/HCl | Mixture of >5 bicyclic products |
| 36 | yy | MeOH/HCl | No reaction                     |

<sup>a</sup> Conditions description: substrate (832  $\mu$ mol), solvent (12 mL), acid catalyst (if specified, 1.8 mol%). <sup>b</sup> 1.8 mol% of HOAc, H<sub>2</sub>O/MeCN 1:1 (v/v, 12 mL). <sup>c</sup> Neat acetic acid.

## 2.4 Reactivity of phenyl silanes

The relative reactivity of four differently substituted phenyl silanes (Scheme S2) in photochemical addition of methanol catalysed by dichloroacetic acid (DCA) was compared.

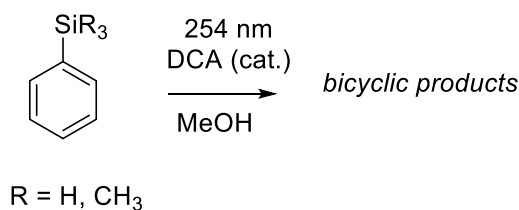

### Scheme S2: Photochemical rearrangement of silyl-substituted benzenes

The relative rates determined from the <sup>1</sup>H NMR of the crude reaction mixtures together with Hammett's  $\sigma$  values for the respective substituents are shown in Table S4.

**Table S4:** Relative rates and Hammett's  $\sigma$  constants of differently substituted phenyl silanes.

| # | R <sub>1</sub> | R <sub>2</sub> | R <sub>3</sub> | $k_{rel}^a$ | $\sigma_m^b$ | $\sigma_p^b$ | $\log(k_{rel})$ | $\log(k/k_0)^c$ |
|---|----------------|----------------|----------------|-------------|--------------|--------------|-----------------|-----------------|
| 1 | H              | H              | H              | 3.8         | 0.05         | 0.1          | 0.584           | 0.292           |

|   |                 |                 |                 |      |                   |                   |       |       |
|---|-----------------|-----------------|-----------------|------|-------------------|-------------------|-------|-------|
| 2 | CH <sub>3</sub> | H               | H               | 17.8 | 0.03 <sup>d</sup> | 0.07 <sup>d</sup> | 1.250 | 0.625 |
| 3 | CH <sub>3</sub> | CH <sub>3</sub> | H               | 36.0 | 0.01              | 0.04              | 1.557 | 0.778 |
| 4 | CH <sub>3</sub> | CH <sub>3</sub> | CH <sub>3</sub> | 100  | -0.04             | -0.07             | 2.000 | 1.000 |

<sup>a</sup> Relative rate calculated from <sup>1</sup>H NMR of parallel reaction. <sup>b</sup> Taken from ref.<sup>1</sup> <sup>c</sup> Logarithm of the ratio of relative rates of the reaction,  $k_0$  is the rate of reaction for TMS benzene. <sup>d</sup> Linearly interpolated value from the constants known for compounds in the entry 1 and 3.

Figure S1 shows a correlation between relative reactivity and Hammett's  $\sigma$  constants (m and p). The data show linear correlation of these data.

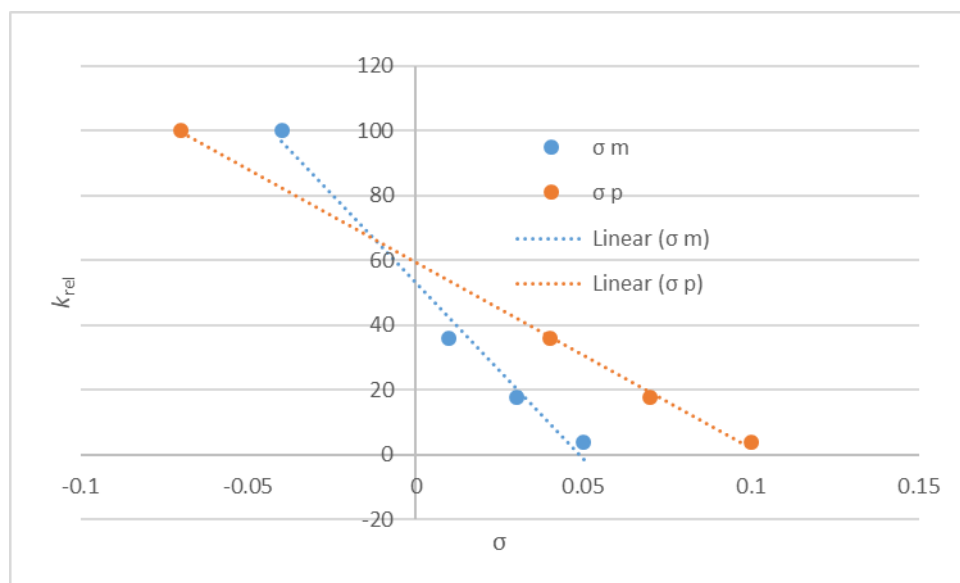

**Figure S1:** Correlation between relative reactivity ( $k_{rel}$ ) and Hammett's  $\sigma$  constants.

The LFER analysis of these data (TMS-benzene photorearrangement taken as  $k_0$ ) is shown in Figure S2. The fit has slightly negative slope with faster reaction with more electron donating (= more negative)  $\sigma$  constant, however, it is not linear as other factors (e. g. steric effects, hyperconjugation) might play role.

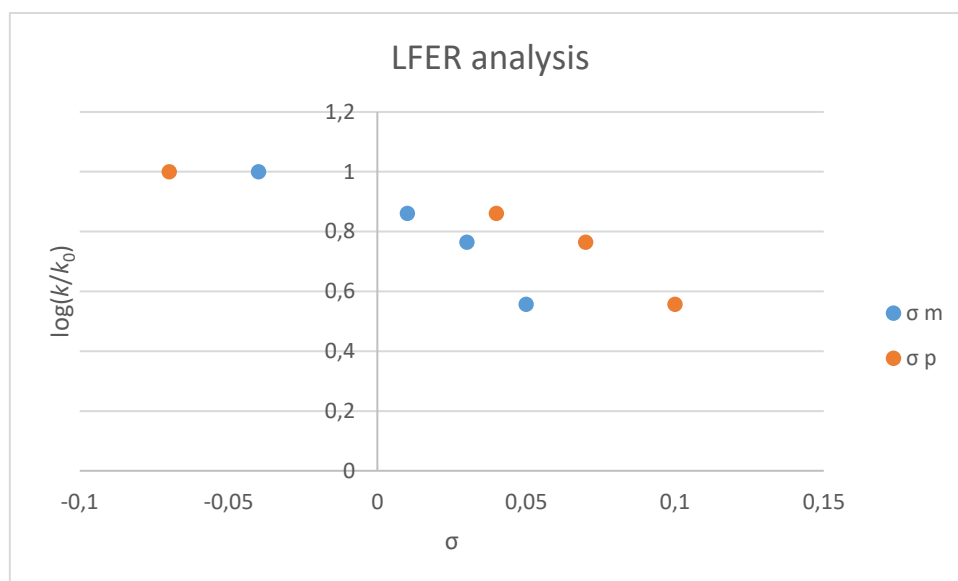

**Figure S2:** LFER analysis of the photorearrangement of differently substituted phenylsilanes.

### 3. Synthesis of the products

#### 3.1 Product purity and separation

The irradiation of arenes leads to complex mixtures of regio- and stereoisomers (often more than 20 different isomers) that interconvert between each other thermally and photochemically (vide infra). They also decompose to undefined polymeric products based on polymerization of fulvene. Since the physical properties of all these small, non-polar, volatile and non-absorbing molecules are very similar, it was often impossible to separate products with purity higher than 70 – 80%. Neither chromatographic techniques (HPLC of column) nor fraction distillation sometimes helped to significantly increase the purity of the final product. However, the products after derivatization (such as the compound **7**) were stable and could be isolated in high final purity. The chemical yields are isolated yields with correction on the product purity calculated based on NMR unless stated elsewhere.

3.2 (±)-((1*S*,4*S*,5*S*,6*R*)-4-methoxybicyclo[3.1.0]hex-2-en-6-yl)trimethylsilane (±)-**1d**

Solution of phenyl trimethylsilane (1.2 mL, 6.97 mmol, 1 eq.) and dichloroacetic acid (10.3 μL, 0.125 mmol, 0.018 eq.) in methanol (100 mL)

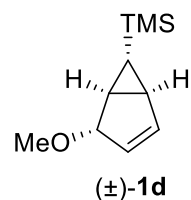

was irradiated in a quartz tube equipped with a stir bar by 254 nm light in a Rayonet reactor equipped with a cooling fan (reaction temperature ~35 °C) for 8 hours. The reaction mixture turned slightly yellow and the solvent was carefully evaporated under reduced pressure. The crude product (1.131 g, 89%, dark brown oil) was purified by column chromatography in Et<sub>2</sub>O in *n*-pentane (2 – 4 %, v/v, R<sub>f</sub> = 0.2 – 0.4, the TLC was analysed by Hanessian's stain) to give the title compound as colourless liquid of characteristic smell (953 mg, 75%).

<sup>1</sup>H NMR (400 MHz, Chloroform-*d*) δ (ppm) 6.37 (d, *J* = 5.5 Hz, 1H, *a*), 5.52 (pseudo dt, *J* = 5.5, 1.5 Hz, 1H, *b*), 4.19 (pseudo t, *J* = 2.2 Hz, 1H, *c*), 3.38 (s, 3H, *d*), 1.83 – 1.77 (m, 1H, *e*), 1.74 (pseudo td, *J* = 5.5, 1.1 Hz, 1H, *f*), -0.03 (s, 9H, *g*), -0.67 (dd, *J* = 5.5, 4.4 Hz, 1H, *h*).

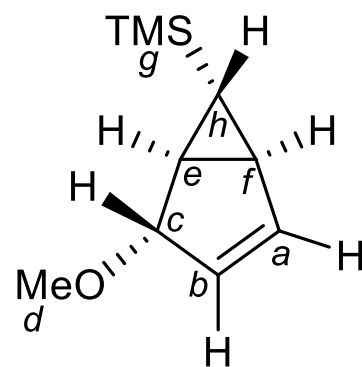

<sup>13</sup>C NMR (101 MHz, Chloroform-*d*) δ (ppm) 142.71 (CH, *a*), 126.90 (CH, *b*), 86.22 (CH, *c*), 54.80 (OMe, *d*), 26.53 (CH, *f*), 26.40 (CH, *e*), 25.23 (CH, *h*), -2.20 (CH, *g*).

HRMS: C<sub>10</sub>H<sub>18</sub>OSi: calculated 182.1127, found 182.1129 (rel. error 1.1 ppm).

*Assignment of the relative configuration on the stereocentres:*

As the molecule is synthesized in one step from a planar substituted benzene, the topology and relative configuration of the carbon atoms on the scaffold could not be determined from the



chemical history of the compound (i.e. from relative geometry of the starting material). A detailed analysis of the COSY spectra (Figure S5) resulted into following conclusions:

- TMS group must be attached to a secondary carbon atom (multiplet at  $-0.68$  ppm)
- OMe group must be attached at secondary carbon (multiplet at  $4.18$  ppm)
- Structure contains only CH signals (no  $\text{CH}_2$  signals present)

All these considerations limit the possible product structure to following stereoisomers (Figure S3):

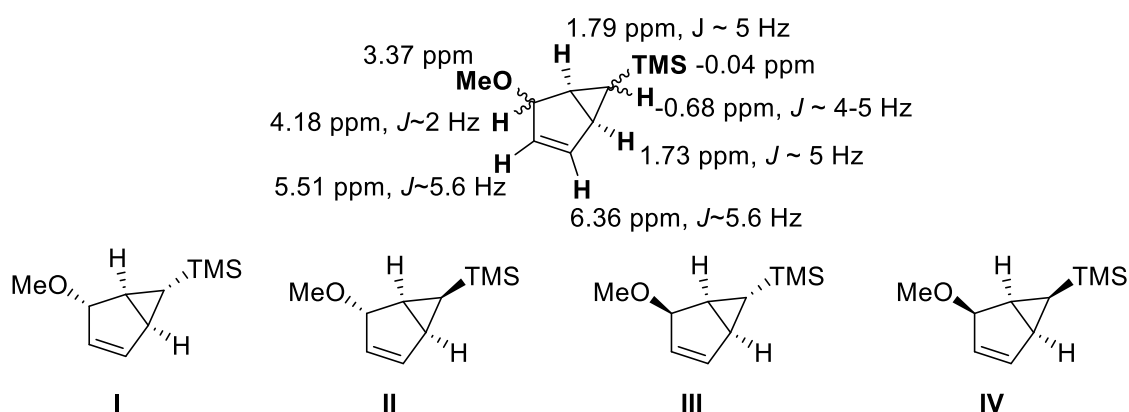

**Figure S3:** Assignment of the  $^1\text{H}$  NMR signals and possible structures of photoproducts.

Coupling constant analysis according to the Karplus equation led to the following findings:

- Coupling constants are generally lower than 7-8 typical for antiperiplanar and synperiplanar conformation
- The structure is puckered and the protons at 1.73 and 1.79 ppm must be *cis* to each other
- All other pairs of protons are *trans* to each other

This suggests the structure **I** as the formed product (Figure 4):

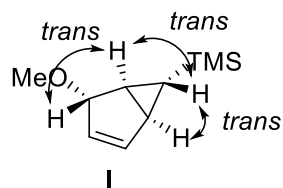

**Figure S4:** Absolute stereochemistry of the major photoproduct

The absolute assignment is in accordance with computational prediction (for details see the computational part). We have further experimentally proven the relative geometry by selective 1D NOE experiment (Figure S5). The selective excitation of the signal at 4.19 ppm (proton *c*) leads to the transfer of magnetization through space to proton *h* (Figure S5, middle, signal 1) and to the neighbouring proton *b* (Figure S5, middle, signal 2). The selective excitation of the signal at -0.67 ppm (proton *h*) leads to the transfer of magnetization to the neighbouring TMS group - protons *g* (Figure S5, bottom, signal 3) and through space to proton *c* (Figure S5, bottom, signal 4).

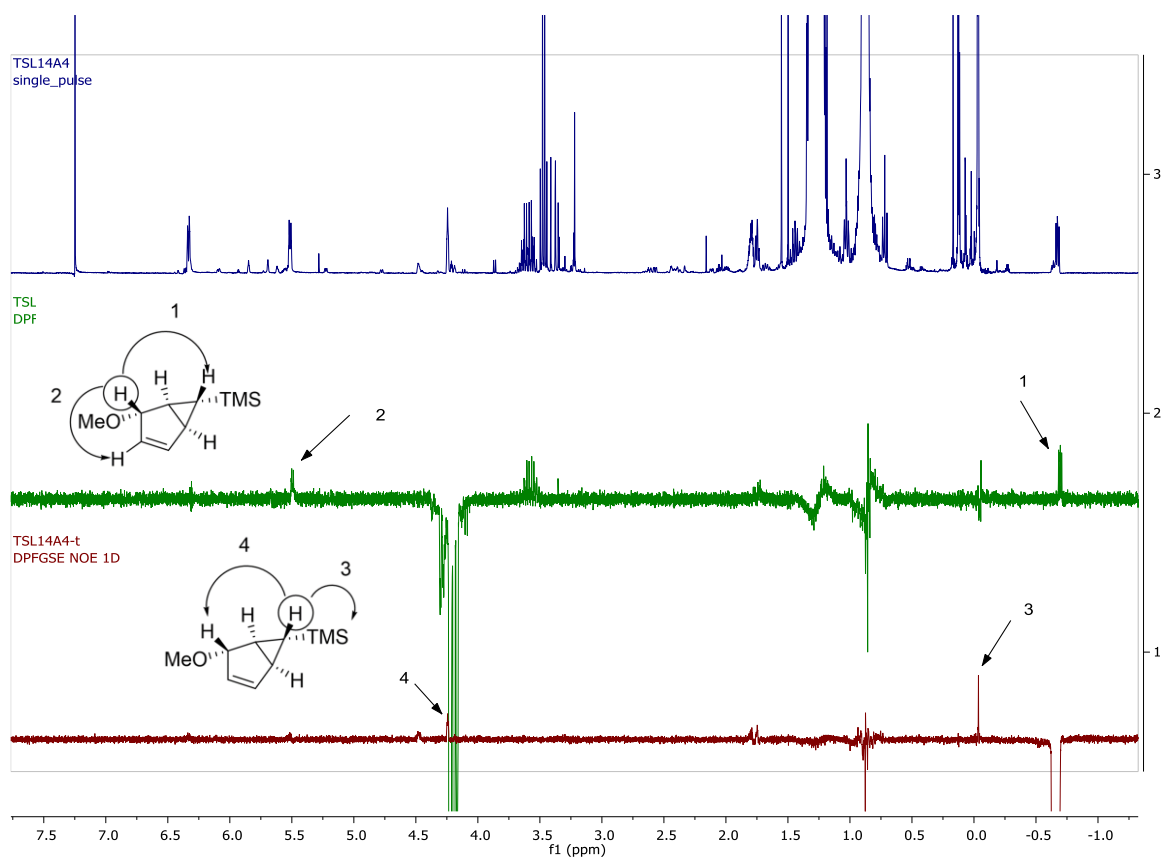

**Figure S5:** 1D NOE analysis of the stereochemistry of the derivative **1d**.  $^1\text{H}$  NMR spectrum of the crude irradiated mixture after exhaustive irradiation (top),  $^1\text{H}$  NOE spectrum with selective excitation at 4.19 ppm (middle) and at -0.67 ppm (bottom). The positive signals showing the transfer of magnetization are highlighted by arrows.

3.3 ( $\pm$ )-((1*R*,2*R*,5*S*)-2-methoxybicyclo[3.1.0]hex-3-en-1-yl)trimethylsilane  
( $\pm$ )-**1e**

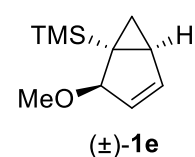

The compound **1e** was identified as a by-product in the synthesis of ( $\pm$ )-**1d**. The product could not be isolated by column as it decomposed on silica. It also decomposed in exhaustive irradiation (vide infra). The maximum yield at ~90% conversion was 40% (NMR), colourless oil with characteristic smell. The structure was determined by careful analysis of its mixture with **1d**.

$^1\text{H}$  NMR (400 MHz, Chloroform-*d*)  $\delta$  (ppm) 6.19 (ddd,  $J = 5.5, 1.1, 0.6$  Hz, 1H, *a*), 5.53 – 5.50 (m, 1H, *b*), 4.40 (s, 1H, *c*), 3.30 (s, 3H, *d*), 1.83 – 1.77 (m, 1H, *e*), 1.76 – 1.68 (m, 1H, *f*), 0.97 (ddd,  $J = 7.9, 3.5, 0.3$  Hz, 1H, *g*), 0.02 (s, 9H, *h*).

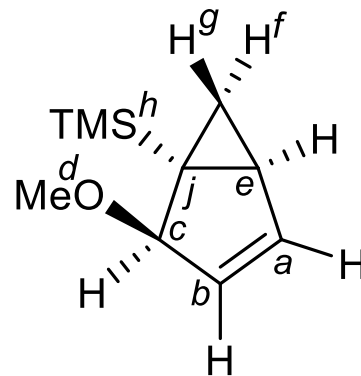

$^{13}\text{C}$  NMR (101 MHz, Chloroform-*d*)  $\delta$  (ppm) 143.82 (CH, *a*), 127.22 (CH, *b*), 85.69 (CH, *c*), 53.77 (OMe, *d*), 27.17 (CH, *e*), 26.39 (CH<sub>2</sub>, *f/g*), 22.83 (C, *j*), -2.29 (TMS, *h*).

HRMS: C<sub>10</sub>H<sub>18</sub>OSi: calculated 182.1127, found 182.1129 (rel. error 1.1 ppm).

*Assignment of the relative configuration on the stereocentres:*

The structure of the by-product **1e** has been elucidated based on NMR studies of the irradiated mixture of **1d**, **1e**, unknown isomeric product and TMS benzene. The structure determination based on  $^1\text{H}$  NMR and 2D experiments could reliably determine all signals except the relative configuration on the carbon bearing the methoxy group (Figure S6).

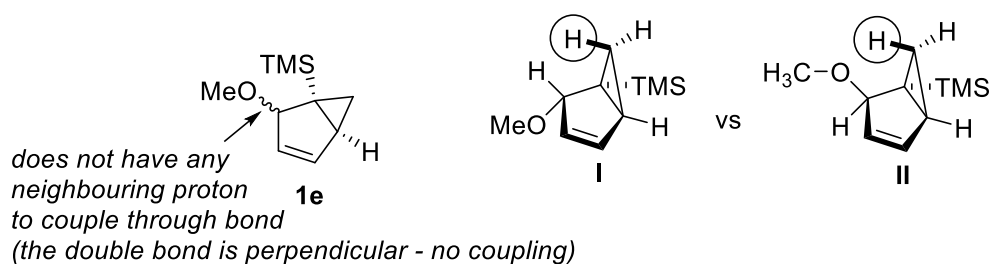

**Figure S6:** Structure of **1e** determined by NMR ( $^1\text{H}$ , COSY).

The computational prediction of the  $^1\text{H}$  NMR spectrum of both structures depicted in Figure 3 (vide infra) provided the clarification of the structure. The most characteristic signal was from

the proton directing *endo* to the bicyclic structure (Figure S6 emphasised by the ring). This signal has been shifted downfield in comparison to the molecule **1d** by 1.7 ppm! This huge effect cannot be caused only by the absence of the TMS group in the close proximity (this absence would cause the difference only of about  $\sim 0.7$  ppm according to the computations). The shift is caused by the transannular interaction (intramolecular hydrogen bond, bond length only  $2.7\text{\AA}$  according to the computations) with the methoxy group which weakens the C–H bond and shifts its NMR signal upfield (Figure S7). We managed to observe also the isomer with the MeO group pointing to the opposite side (*exo*) as one of the minor by-products.

only 2.7 Angström, intramolecular H-bond

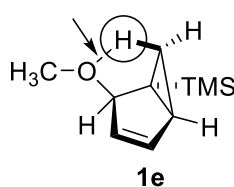

**Figure S7:** Final determined structure of the molecule **1e**.

The absolute assignment has been further experimentally proven the relative geometry by selective 1D NOE experiment (Figure S8). The selective excitation of the signal at 4.40 ppm (proton *c*) leads to the transfer of magnetization to the neighbouring proton *b* (Figure S8, middle, signal 1) and through space to proton *e* (Figure S8, middle, signal 2). No transfer of the magnetization to the proton *g* has been observed which confirms that *c* and *g* are located at the opposite faces of the molecule. The selective excitation of the signal at 0.96 ppm (proton *g*) leads to the transfer of magnetization to the neighbouring proton *f* (Figure S8, bottom, signal 3). Again, no transfer of the magnetization to the proton *c* has been observed.

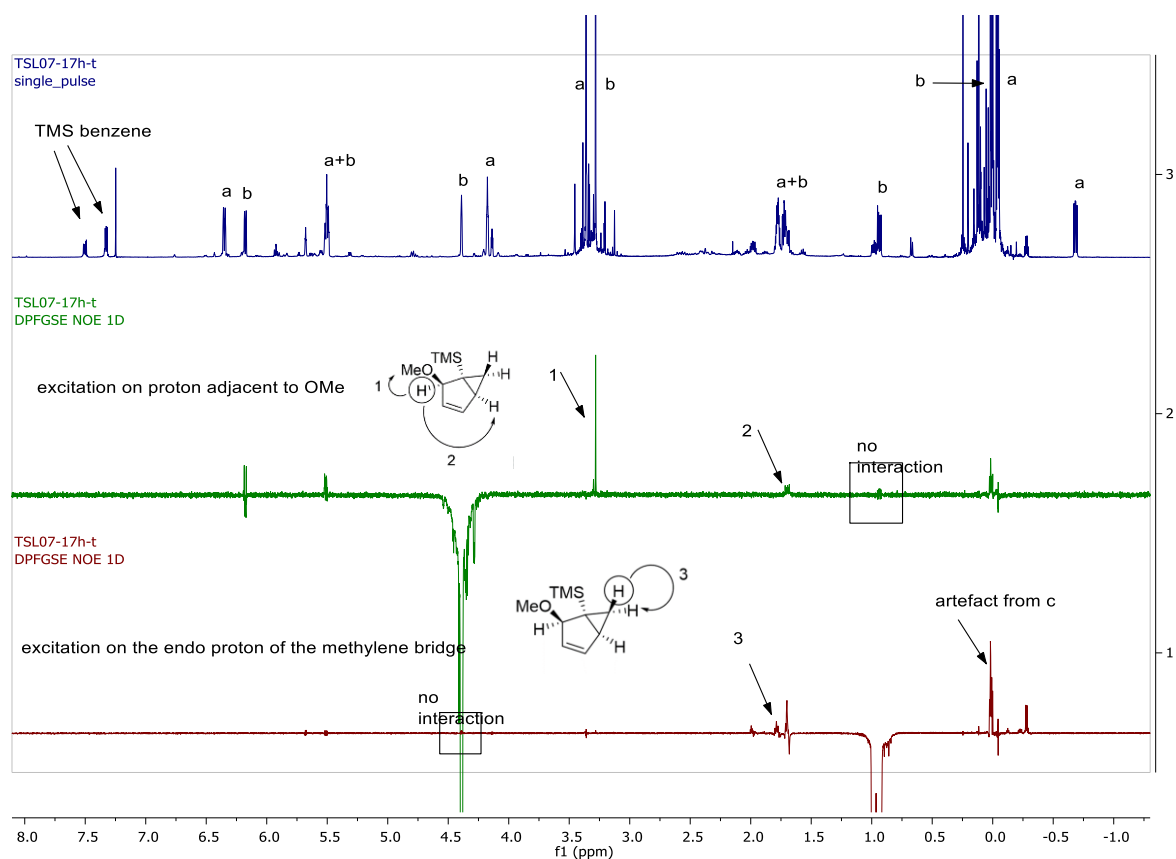

**Figure S8:** NOE analysis of the stereochemistry of the derivative **1e**.  $^1\text{H}$  NMR spectrum of the crude irradiated mixture after exhaustive irradiation (top; signals of two isomers: a: **1d**, b: **1e**),  $^1\text{H}$  NOE spectrum with selective excitation at 4.40 ppm (middle) and at 0.96 ppm (bottom). The positive signals showing the transfer of magnetization are highlighted by arrows, the expected missing interactions are highlighted by black squares.

3.4 ( $\pm$ )-(1*R*,4*S*,5*S*)-1-(*tert*-butyl)-4-methoxybicyclo[3.1.0]hex-2-ene, ( $\pm$ )-**1c**

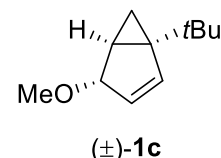

Solution of *tert*-butyl benzene (0.537 mL, 3.49 mmol, 1 eq.) and dichloroacetic acid (5.2  $\mu\text{L}$ , 0.0625 mmol, 0.018 eq.) in methanol (50 mL) was irradiated in a quartz tube equipped with a stir bar by 254 nm light in a Rayonet reactor equipped with a cooling fan (reaction temperature  $\sim 35$   $^\circ\text{C}$ ) for 6 hours. The reaction mixture turned slightly yellow and the solvent was carefully evaporated under reduced pressure. The crude product (0.54 g, 93%, dark yellow

oil) contained a mixture of three main products which is consistent to the literature.<sup>2</sup> The mixture was purified by column chromatography in Et<sub>2</sub>O in *n*-pentane (2 – 10 %, v/v, R<sub>f</sub> = 0.3 – 0.6, the TLC was analysed by Hanessian's stain) to give the title compound as colourless liquid of characteristic smell (301 mg, 52%). The compound has been previously described in the literature.<sup>2</sup>

<sup>1</sup>H NMR (400 MHz, Chloroform-*d*)  $\delta$  (ppm) 6.24 (d,  $J = 5.6$  Hz, 1H, *a*), 5.43 (dt,  $J = 5.6, 1.9$  Hz, 1H, *b*), 4.12 (s, 1H, *c*), 3.32 (s, 3H, *d*), 1.66 (dd,  $J = 8.5, 4.2$  Hz, 1H, *e*), 0.99 (t,  $J = 2.1$  Hz, 1H, *f*), 0.90 (s, 9H, *g*), -0.13 (t,  $J = 4.1$  Hz, 1H, *h*).

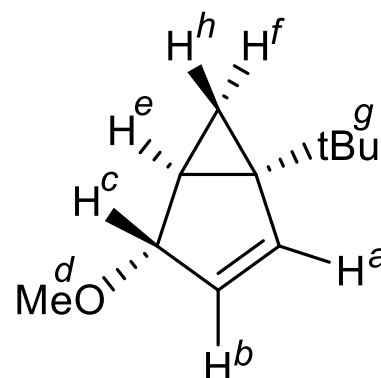

*Assignment of the relative configuration on the stereocentres:*

The major photoproduct of the rearrangement of the *tert*-butyl benzene has <sup>1</sup>H NMR spectrum (Figure S55) similar to the products TMS-benzene rearrangement (Figures S44 and S49). Based on COSY experiments (Figure S11), its structure has been assigned as with *t*Bu-group at the bridging atom and MeO in *exo* position (Figure S9).

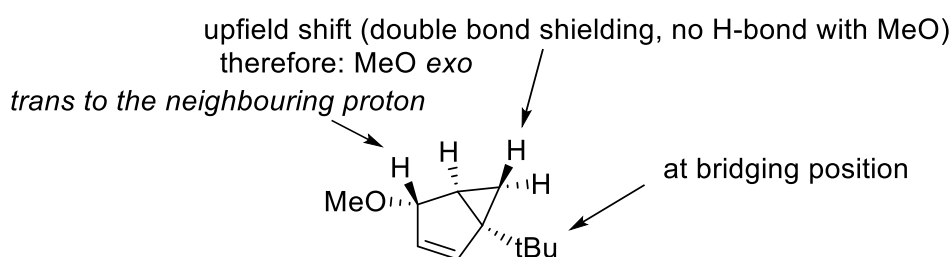

**Figure S9:** Assignment of the constitution of the product **1c** based on <sup>1</sup>H NMR and COSY.

To confirm the structure, we have calculated sum of squared residuals calculated by subtraction of measured NMR shifts from the predicted shifts by computation for total 12 possible products (Figure S10). The assignment is shown in the Table S5.

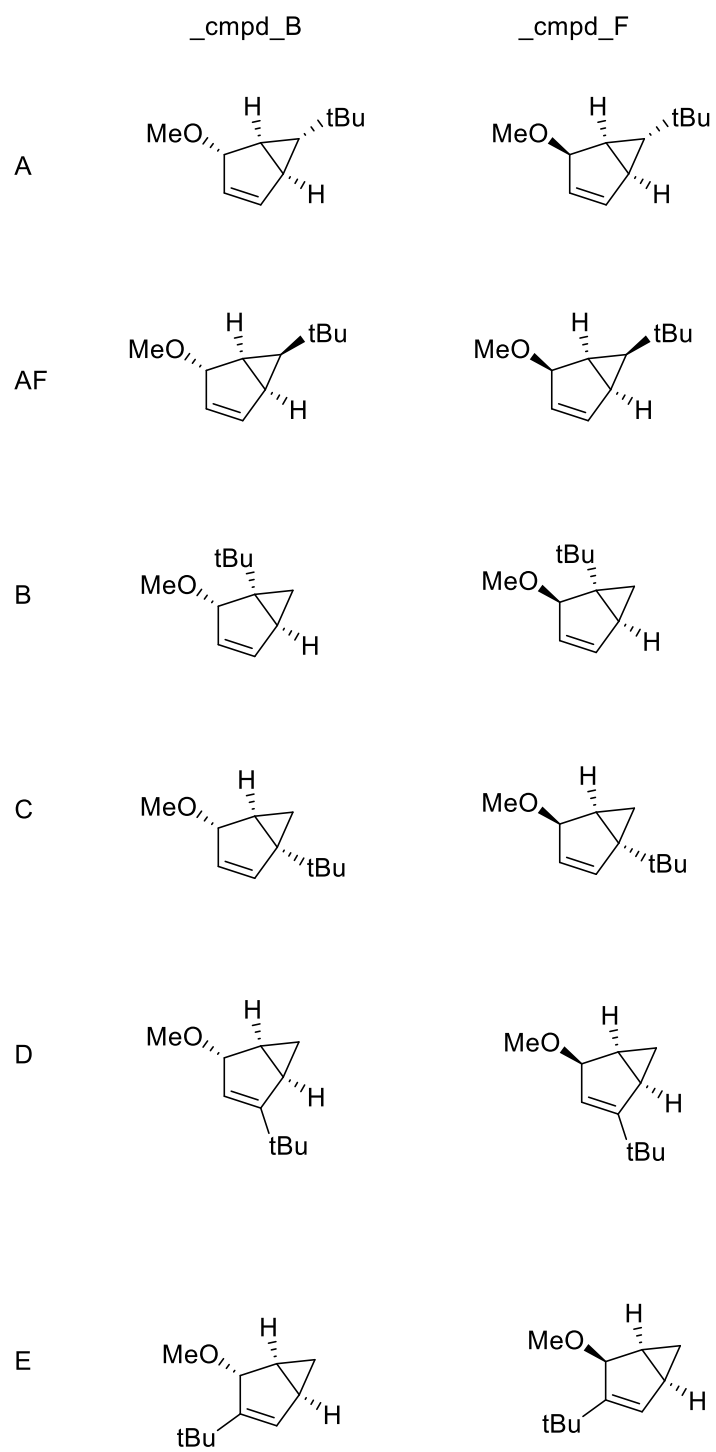

**Figure S10:** Possible rearrangement product of tert-Bu-benzene in methanol



**Table 5:** <sup>1</sup>H NMR signals (in ppm) measured and predicted for the possible structures.<sup>a</sup>

| exp       | 6.24   | 5.43   | 4.12   | 3.32              | 1.66    | 0.99    | 0.9  | -0.13  |
|-----------|--------|--------|--------|-------------------|---------|---------|------|--------|
| A_cmpd_B  | 6.4025 | 5.7368 | 4.137  | n.d. <sup>b</sup> | 1.82295 | 1.82295 | n.d. | 0.1118 |
| A_cmpd_F  | 6.2387 | 5.4975 | 4.9876 | n.d.              | 1.8015  | 1.4573  | n.d. | 0.9272 |
| AF_cmpd_B | 6.3689 | 6.2189 | 4.3604 | n.d.              | 2.0942  | 1.8557  | n.d. | 1.041  |
| AF_cmpd_F | 5.9789 | 5.639  | 5.0372 | n.d.              | 2.1656  | 1.5383  | n.d. | 0.7302 |
| B_cmpd_B  | 6.6075 | 6.0575 | 4.2217 | n.d.              | 1.7016  | 1.3034  | n.d. | -0.153 |
| B_cmpd_F  | 6.4669 | 5.9744 | 4.7200 | n.d.              | 1.5221  | 0.9443  | n.d. | 0.7435 |
| C_cmpd_B  | 6.6497 | 6.0503 | 4.1047 | n.d.              | 1.7126  | 1.0861  | n.d. | -0.088 |
| C_cmpd_F  | 6.4468 | 5.8701 | 4.8227 | n.d.              | 1.5413  | 0.7818  | n.d. | 0.6679 |
| D_cmpd_B  | 0.9349 | 5.6215 | 4.1326 | n.d.              | 1.8269  | 1.744   | n.d. | -0.135 |
| D_cmpd_F  | 0.5745 | 5.0295 | 4.8564 | n.d.              | 1.804   | 1.5482  | n.d. | 0.5745 |
| E_cmpd_B  | 6.0589 | 0.8412 | 4.2564 | n.d.              | 1.7536  | 1.7536  | n.d. | -0.125 |
| E_cmpd_F  | 5.9128 | 0.5487 | 4.9486 | n.d.              | 1.7467  | 1.5356  | n.d. | 0.5487 |

<sup>a</sup> Computational details about used methods are shown in the computational part below. <sup>b</sup> n.d. = not determined (not relevant for the structural determination, the NMR shifts do not differ between studied isomers)

The best fit corresponds to the structures A\_cmpd\_B, B\_cmpd\_B and C\_cmpd\_B. The COSY analysis excludes the possibility of A\_cmpd\_B because the *tert*-butyl group must be located on the bridging atom.

1D NOE experiments (Figure S11) show weak transfer of magnetisation from the *tert*-butyl group to the methoxy group (and vice versa) which indicates that they are far from each other but *cis* to each other. Moreover, a strong transfer of magnetisation was observed from the *tert*-butyl group to the proton of double bond at 6.23 ppm (Figure S11, signal 5, bottom).

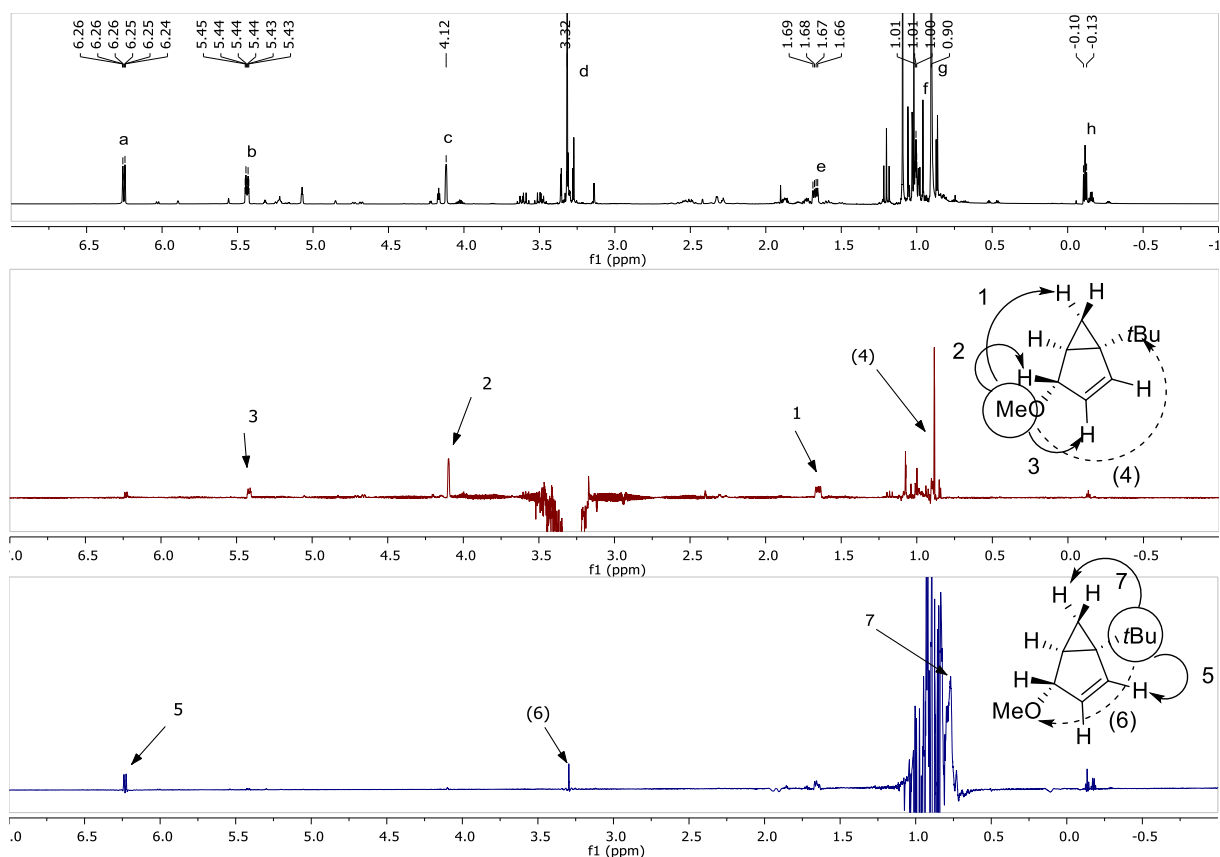

**Figure S11:** NOE analysis of the stereochemistry of the derivative **1c**.  $^1\text{H}$  NMR spectrum of **1c** (top),  $^1\text{H}$  NOE spectrum with selective excitation at 3.30 ppm (middle) and at 0.98 ppm (bottom). The positive signals showing the transfer of magnetization are highlighted by arrows and numbered. Weak interactions have numbers in brackets.

All spectral measurements suggest the structure **C\_cmpd\_B** as the correct one (Figure S12). This also corresponds to the calculated predictions and mechanistic considerations where the bulky *tert*-butyl group should facilitate the addition of the solvent at the opposite side in the cation (Figure S12, right side).

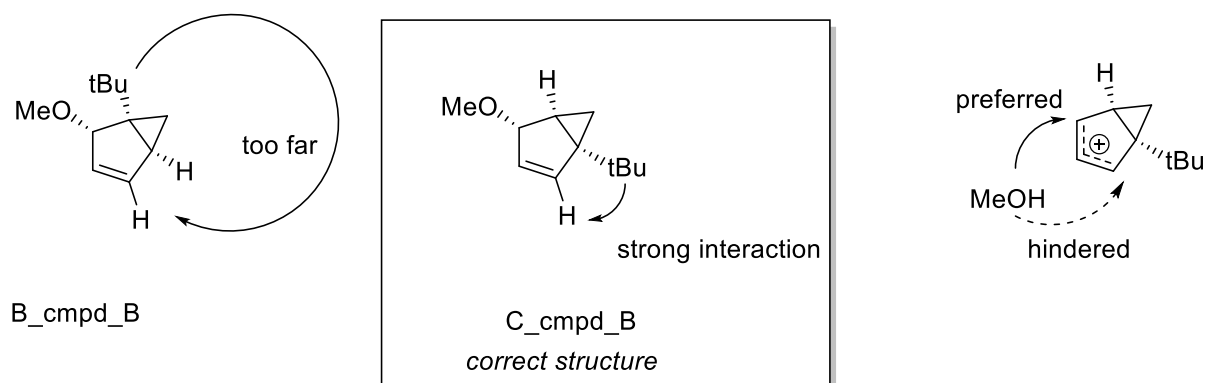

**Figure S12:** Structural elucidation of the product of the rearrangement of *tert*-butylbenzene in methanol.

3.5 ( $\pm$ )-(1*S*,2*S*,5*S*)-bicyclo[3.1.0]hex-3-en-2-ol, ( $\pm$ )-**1a**

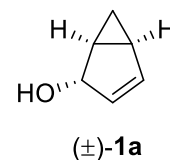

A solution of benzene (111  $\mu$ L, 1.421 mmol, 1 eq.) in water (18 mL) and acetic acid (1.5 mg, 26  $\mu$ mol, 0.018 eq.) was loaded into a tube reactor and irradiated for 15 h by 254 nm light in a flow reactor. A white turbid precipitate was created in the tubing gradually over the course of the reaction. The reaction mixture was extracted by diethyl ether ( $2 \times 10$  mL), the organic phase was dried over  $\text{MgSO}_4$  and the solvent was carefully removed under reduced pressure to give colorless oil (94 mg, 69%). The compound has been previously described in the literature.<sup>3,4</sup> The relative configuration on the stereocentres has been determined by  $^1\text{H}$  and COSY NMR analysis and corresponds to the previous reports.<sup>3,4</sup>

$^1\text{H}$  NMR (500 MHz, Chloroform-*d*)  $\delta$  (ppm) 6.22 (dd,  $J = 5.4, 1.7$  Hz, 1H, *a*), 5.52 (d,  $J = 5.4$  Hz, 1H, *b*), 4.41 (s, 1H, *c*), 1.97 – 1.82 (m, 1H, *d*), 1.74 (dt,  $J = 8.1, 4.8$  Hz, 1H, *e*), 0.96 (td,  $J = 8.0, 3.9$  Hz, 1H, *f*), -0.11 (q,  $J = 3.9$  Hz, 1H, *g*).

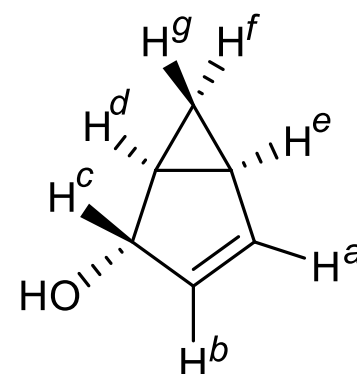

### 3.6 (±)-(1*S*,2*S*,5*S*)-bicyclo[3.1.0]hex-3-en-2-yl acetate, (±)-**1b**

Solution of benzene (74  $\mu$ L, 0.83 mmol, 1 eq.) in glacial acetic acid (12 mL) was irradiated in a quartz tube equipped with a stir bar by 254 nm light in a Rayonet reactor equipped with a cooling fan (reaction temperature  $\sim$ 35  $^{\circ}$ C) for 6 hours. The reaction mixture was diluted with distilled water (150 mL) and neutralized with sodium bicarbonate (30 mL, saturated aq., carefully added) and extracted to diethyl ether (3  $\times$  30 mL). The combined organic extracts were dried by  $MgSO_4$  and evaporated under reduced to give the title compound as colourless liquid of characteristic smell (52 mg, yield recalculated on the purity: 45%). The compound was obtained in a mixture of other inseparable isomers ( $\sim$ 20%) that interconverted between each other thermally and photochemically. The compound has been previously described in the literature. The relative configuration on the stereocentres has been determined by  $^1H$  and COSY NMR analysis and corresponds to the previous reports.<sup>3</sup>

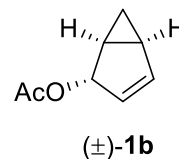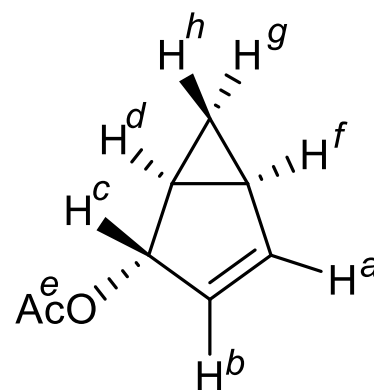

$^1H$  NMR (400 MHz, Chloroform-*d*)  $\delta$  (ppm) 6.34 (dd,  $J = 4.4, 1.2$  Hz, 1H, *a*), 5.49 (d,  $J = 5.6$  Hz, 1H, *b*), 3.99 (t,  $J = 6.5$  Hz, 1H, *c*), 2.68 – 2.55 (m, 1H, *d*), 1.96 (s, 3H, *e*), 1.80 (t,  $J = 8.8$  Hz, 1H, *f*), 1.03 (t,  $J = 7.2$  Hz, 1H, *g*), 0.04 – 0.02 (m, 1H, *h*).

### 3.7 (±)-(1*S*,2*S*,5*S*)-bicyclo[3.1.0]hex-3-en-2-yl (*tert*-butoxycarbonyl)-L-phenylalaninate, (±)-**7**

*N*-Boc-L-Phenylalanine (377 mg, 1.4231 mmol, 2.0 eq.), 4-dimethylaminopyridine (DMAP, 43 mg, 0.3557 mmol, 0.5 eq.) and (±)-**5a** (68

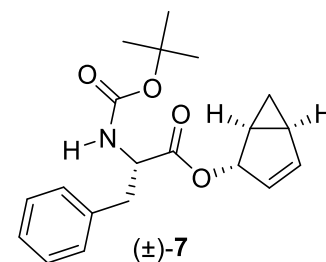

mg, 0.7115 mmol, 1.0 eq.) were mixed in a Schlenk flask under nitrogen atmosphere. Anhydrous THF (2 mL) was added to dissolve the acid followed by addition of anhydrous DCM (5 mL) and the resultant suspension was stirred for 4 min at 0 °C. A solution of dicyclohexylcarbodiimide (DCC, 293 mg, 1.4231 mmol, 2 eq.) in anhydrous DCM (5 mL) was added slowly and the reaction mixture was stirred for 18h at room

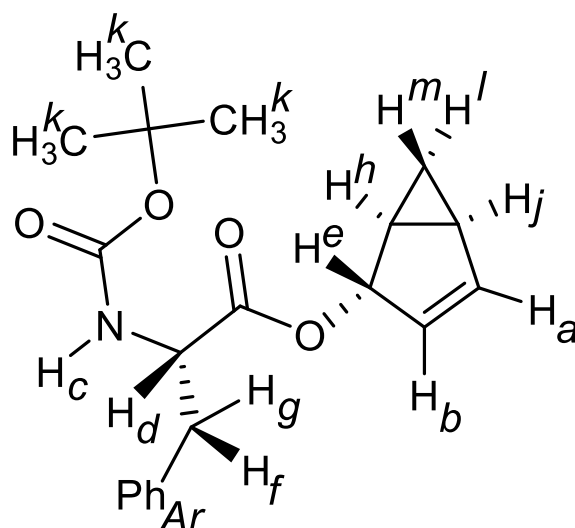

temperature. The reaction mixture turned light yellow over the course of the reaction. The precipitate was filtered out and the organic solvent was removed under reduced pressure and the crude product was purified by column chromatography (Et<sub>2</sub>O:pentane = 1:2 to 1:0, R<sub>f</sub> = 0.2 to 0.8) to give the title compound as a colorless oil which upon standing in the freezer gave off-white solid with a characteristic smell (204 mg, 84 %). Isolated as a mixture of diastereomers.

<sup>1</sup>H NMR (400 MHz, Chloroform-*d*) δ (ppm) 7.32 – 7.21 (m, 3H, *Ar*), 7.19 – 7.12 (m, 2H, *Ar*), 6.40 – 6.34 (m, 1H, *a*), 5.49-5.41 (m, 2H, *b* and *e*), 5.07 – 4.96 (m, 1H, *f*), 4.63 – 4.51 (m, 1H, *g*), 3.22-3.01 (m, 2H, *c* and *d*), 2.04-1.96 (m, 1H, *h*), 1.84-1.66 (m, 1H, *j*), 1.42 (s, 9H, *k*), 1.09-1.00 (m, 1H, *l*), 0.10-0.02 (m, , 1H, *m*).

NMR (101 MHz, Chloroform-*d*) δ (ppm) 171.49 (COOR), 155.22 (NC(O)OR), 142.96 (CH, *a*), 136.23 (C<sub>Ar</sub>), 129.64 (C<sub>Ar</sub>H), 128.58 (C<sub>Ar</sub>H), 127.05 (C<sub>Ar</sub>H), 125.95 (CH, *b*), 80.51 (C, *t*-Bu), 79.89 (CH, *e*), 54.62 (CH, *d*), 38.46 (CH<sub>2</sub>, *g/f*), 28.41 (CH<sub>3</sub>, *k*), 23.04 (CH<sub>2</sub>. *m/l*), 22.26 (CH, *j*), 21.77 (CH, *h*).

HRMS (QTOF MS ESI<sup>+</sup>): calculated for C<sub>20</sub>H<sub>26</sub>NO<sub>4</sub><sup>+</sup> [M+H<sup>+</sup>] 344.1856, found 344.1867,  $\Delta m$  = 3.1 ppm.

### 3.8 Chiral separation

Enantiomers of **7** (total amount 60 mg, injected amount 12 mg per run,  $c$  = 30 mg/mL) were separated by supercritical fluid chromatography (SFC) with a chiral column (Chiralpak ID) in supercritical 2-propanol/CO<sub>2</sub> (1/1, 120 bar, flow 70 mL/min) at 30°C. The isomers **7-RRR** and **7-SSS** were obtained in amount and purity 25 mg (ee = 98.8 %) and 26 mg (ee = 96.9 %), respectively. The purity of separated enantiomers is shown in Figures S13 and S14.

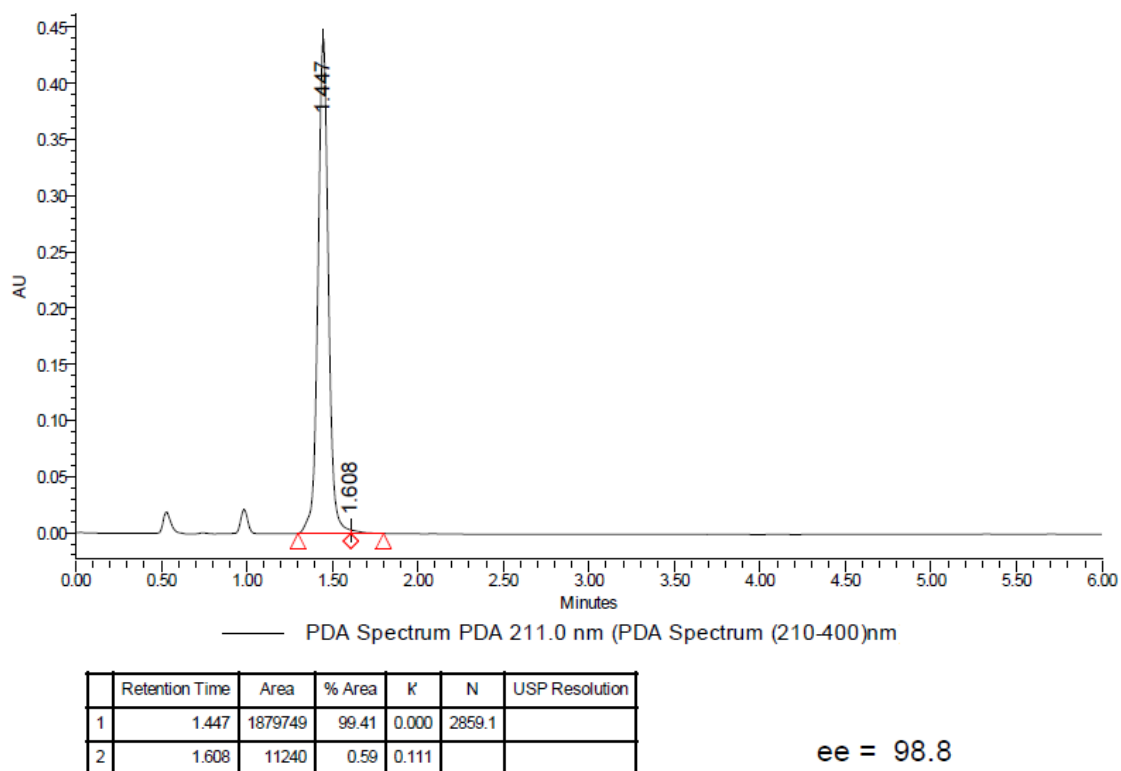

**Figure S13:** SFC chromatogram of **7-RRR**.

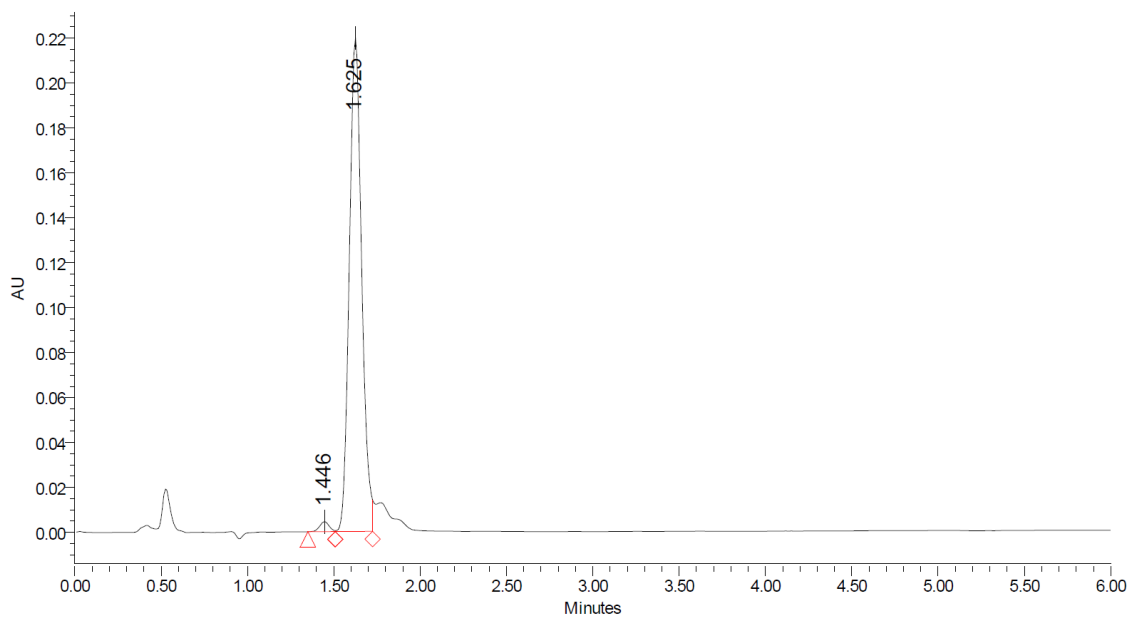

|   | Retention Time | Area    | % Area | K     | N      | USP Resolution |
|---|----------------|---------|--------|-------|--------|----------------|
| 1 | 1.446          | 17122   | 1.54   | 0.000 | 3202.8 |                |
| 2 | 1.625          | 1092889 | 98.46  | 0.123 | 2417.7 | 1.490          |

ee = 96.9

**Figure S14:** SFC chromatogram of **7-SSS**.

### 3.9 Structural NMR characterization of the isolated diastereomers

The separated diastereomers were analyzed by detailed NMR-2D analysis (COSY, HMBC, NOE). The samples were measured in  $\text{CDCl}_3$  with 600 MHz NMR spectrometer. The structures of diastereomers for the means of structural determination were numbered according to the Figure S15.

### Numbering:

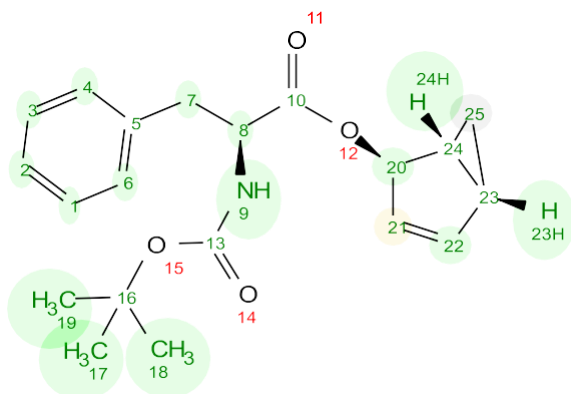

**Figure S15:** numbering of the derivative **7**.

### Results:

Spectra of both samples are fully assigned and agree with proposed structures. The spectra from show very small shift differences both for  $^1\text{H}$  and  $^{13}\text{C}$ , as to be expected from two diastereomers. The NOESY spectra show some differences between the two substances and NOSY data to the 3D- structures obtained by MonteCarlo molecular mechanics searches used for VCD determination. NMR NOESY correlations fit the structures obtained from VCD experiments (see below).

In NOESY expansions below (Figures S16 – S23) it is observed that the phenyl ring CH(4/6) in **7-SSS** are in contact with CH(21). In **7-RRR** on the other hand CH(4/6) have correlations to CH(24) and not CH(21). (The same correlations are obtained for CH(7) but these are even more weak.)

NOE data can be fitted to the low energy structures obtained in VIDA to suggest the structures below:



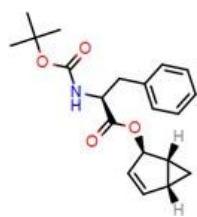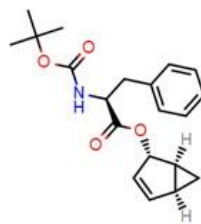

**7-RRR**

**7-SSS**

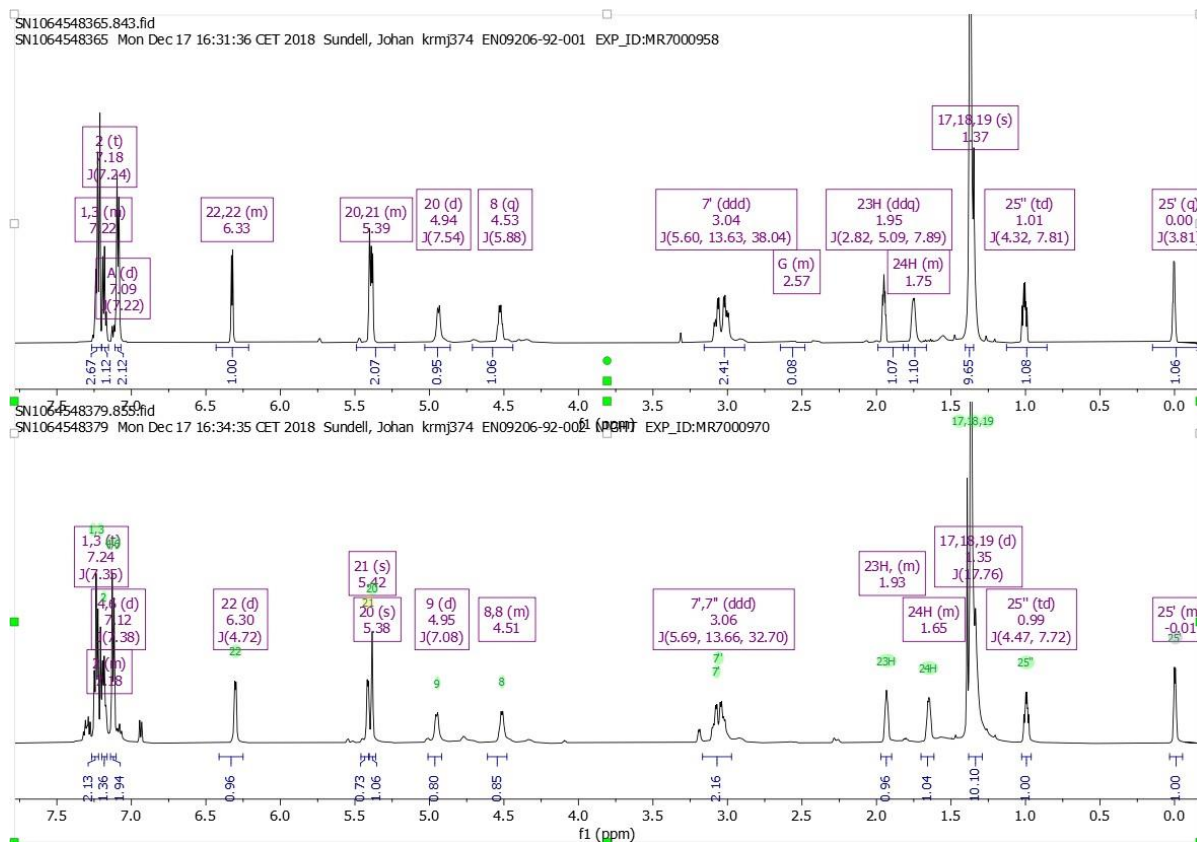

**Figure S16: Comparison of <sup>1</sup>H spectra.**

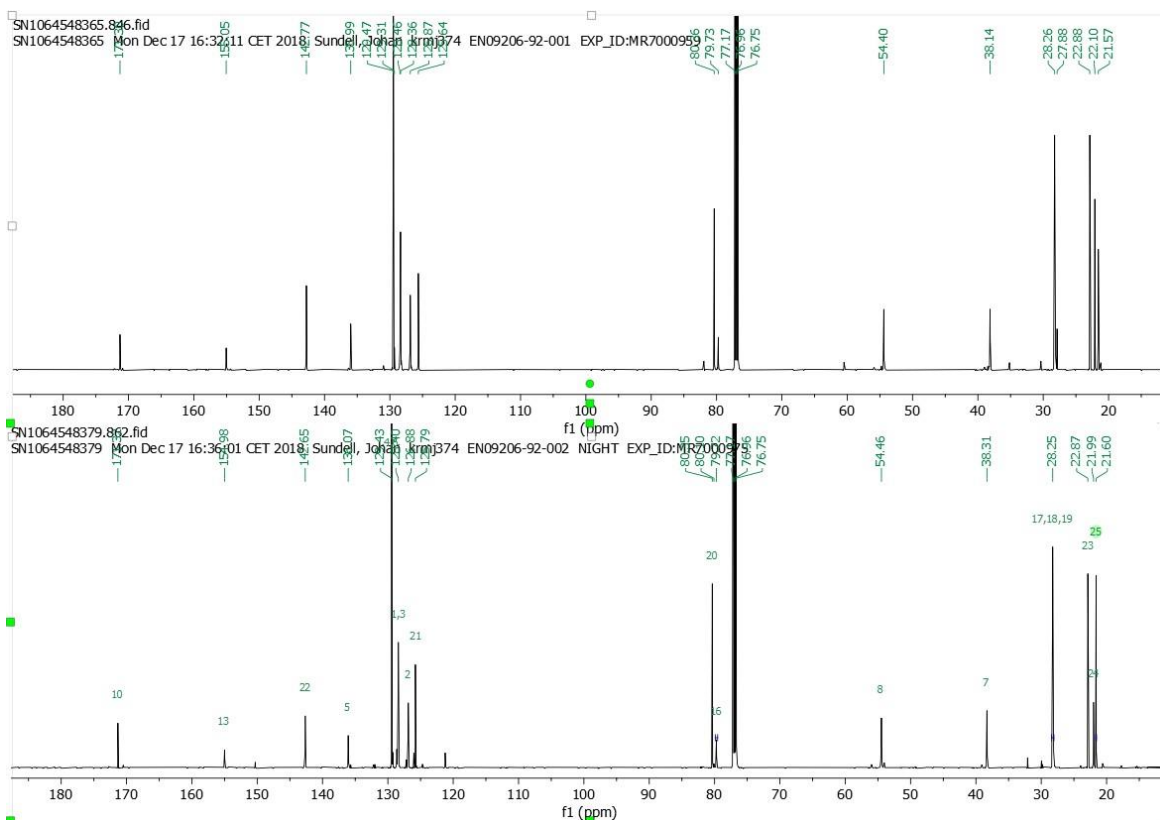

Figure S17: Comparison of  $^{13}\text{C}$  spectra.

Indicating NOE correlations for **7-RRR**.

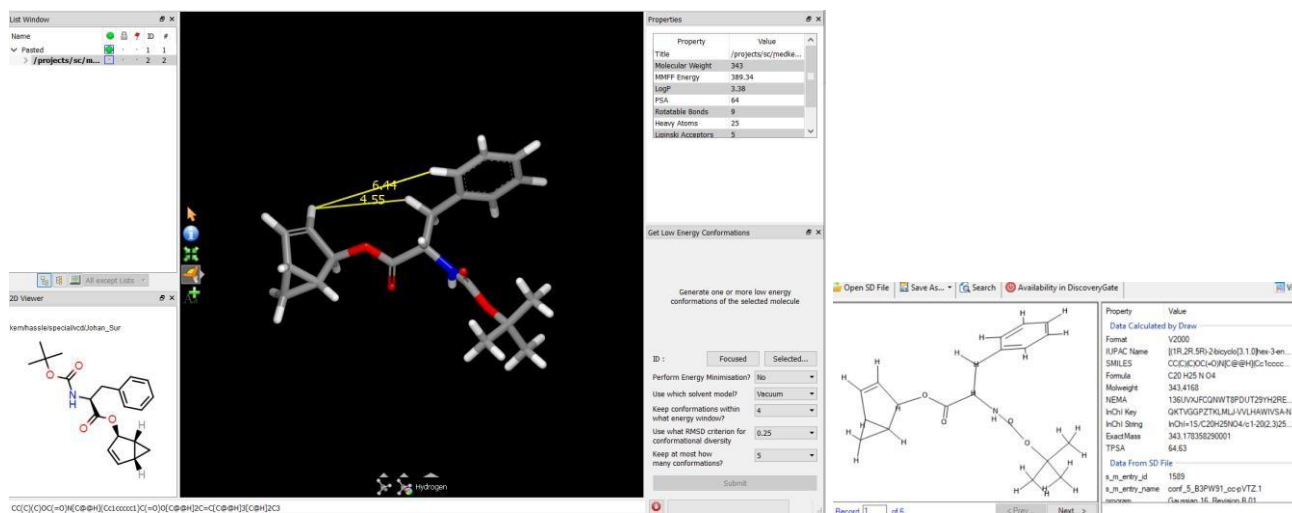

Figure S18: 3D representation low energy conformer of **7-RRR**.

Showing NOE correlations from **7-SSS**.

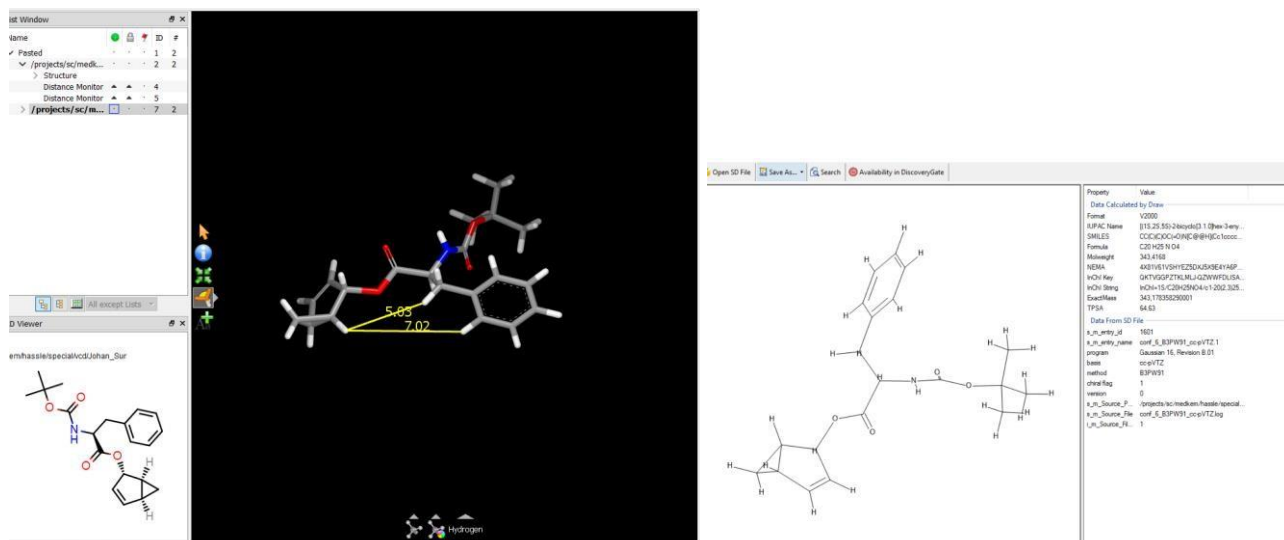

**Figure S19:** 3D representation low energy conformer of structure **7-SSS**.

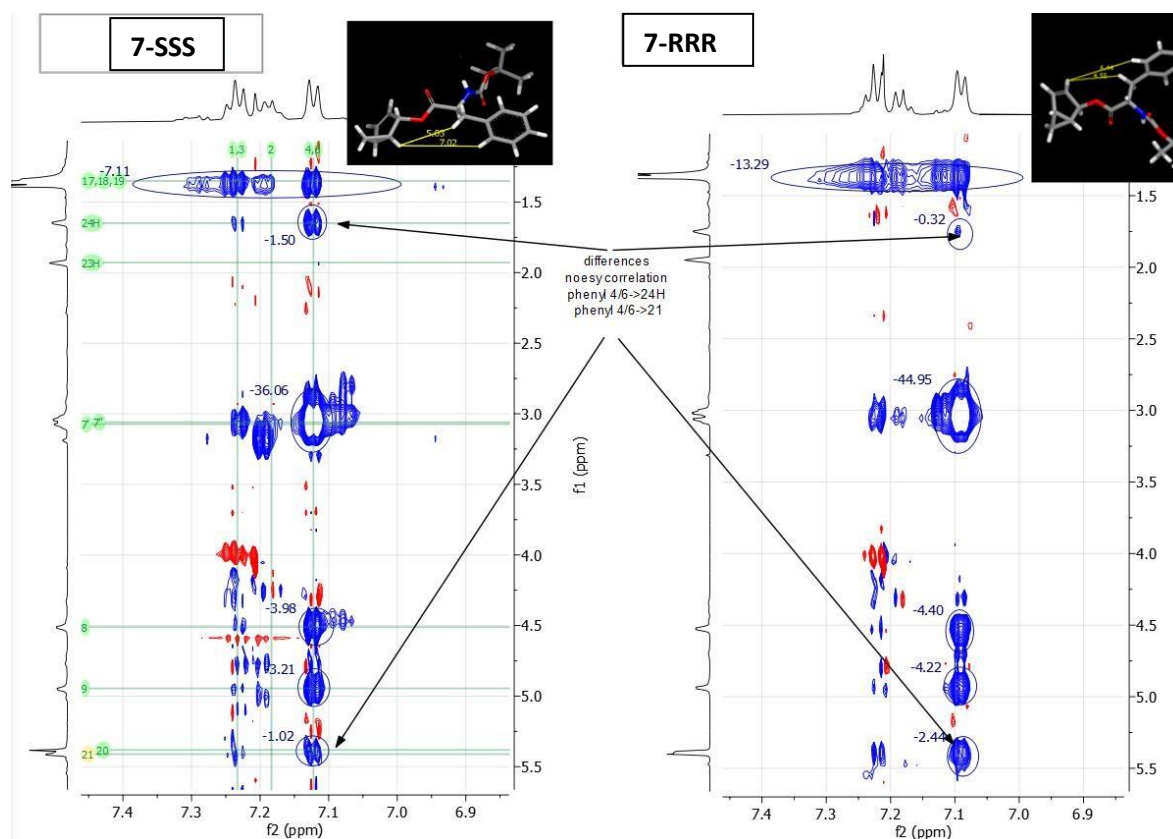

**Figure S20:** NOESY comparison. CH4/6

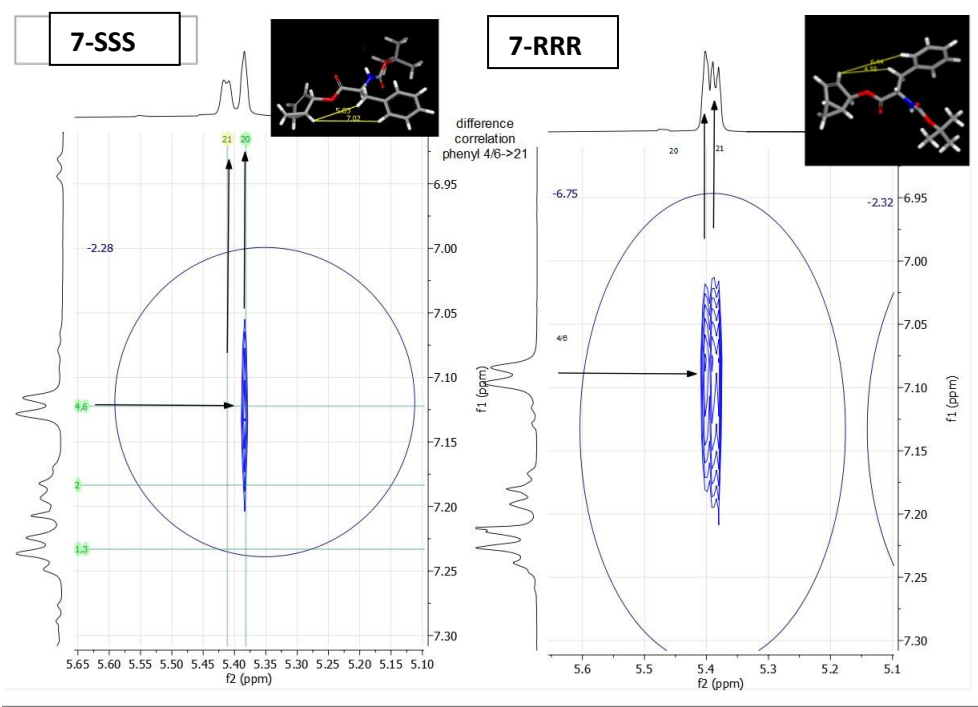

Figure S21: NOESY comparison expansion CH(21).

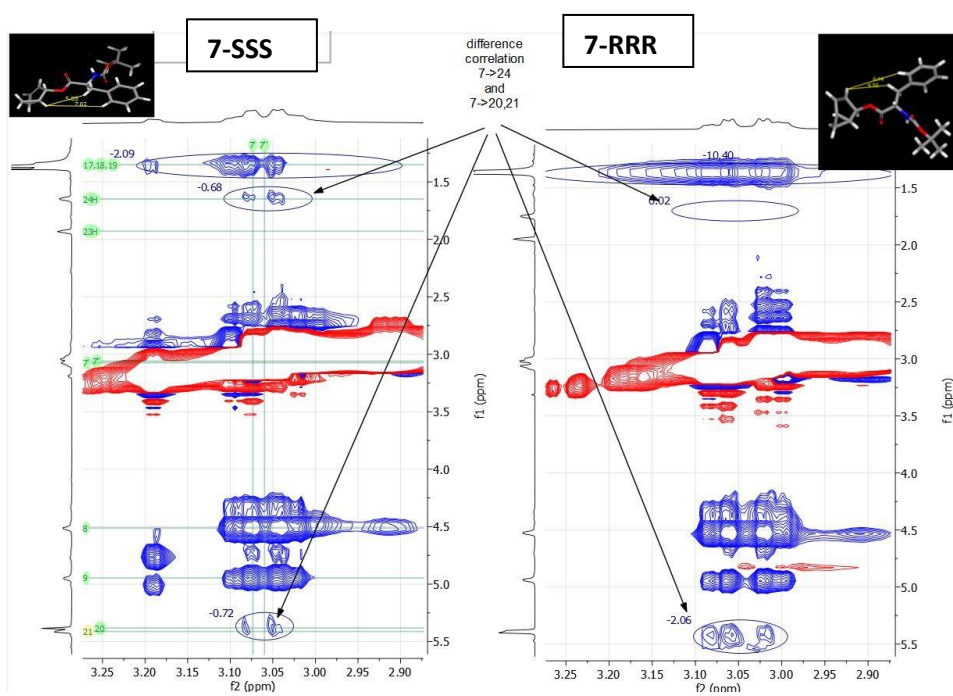

Figure S22: NOESY comparison expansion CH(7).

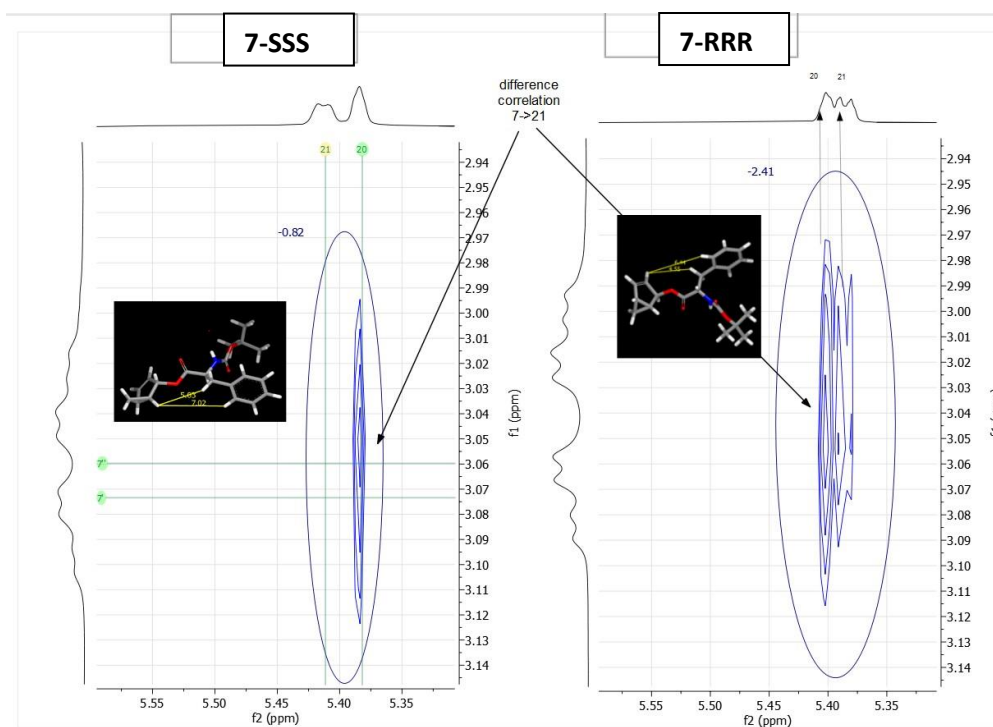

**Figure S23:** NOESY comparison expansion CH(21)->CH(7).

**Table S6:** List of NMR signals and key NOE correlations of diastereomers **7-RRR** and **7-SSS**.

**7-SSS**

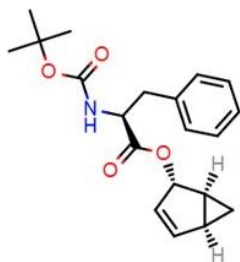

**7-RRR**

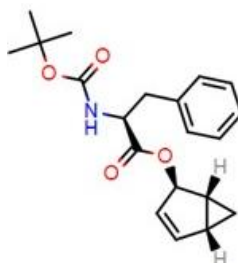

| Atom       | Shift  | NOE |
|------------|--------|-----|
| <b>1 C</b> | 128.41 |     |
| <b>H</b>   | 7.23   |     |
| <b>2 C</b> | 126.87 |     |
| <b>H</b>   | 7.23   |     |
| <b>3 C</b> | 128.41 |     |
| <b>H</b>   | 7.23   |     |

| Atom       | Shift  | NOE |
|------------|--------|-----|
| <b>1 C</b> | 128.38 |     |
| <b>H</b>   | 7.23   |     |
| <b>2 C</b> | 126.86 |     |
| <b>H</b>   | 7.18   |     |
| <b>3 C</b> | 128.38 |     |
| <b>H</b>   | 7.23   |     |

|              |        |              |            |        |         |
|--------------|--------|--------------|------------|--------|---------|
| <b>4 C</b>   | 129.47 | 4/6->24      | <b>4 C</b> | 129.40 | 4/6->21 |
| <b>H</b>     | 7.09   |              | <b>H</b>   | 7.12   |         |
| <b>5 C</b>   | 135.99 | 7->24        | <b>5 C</b> | 136.26 | 7->21   |
| <b>6 C</b>   | 129.47 |              | <b>6 C</b> | 129.40 |         |
| <b>H</b>     | 7.09   |              | <b>H</b>   | 7.12   |         |
| <b>7 C</b>   | 38.14  |              | <b>7 C</b> | 38.40  |         |
| <b>H'</b>    | 3.06   |              | <b>H'</b>  | 3.07   |         |
| <b>H''</b>   |        |              | <b>H''</b> | 3.06   |         |
| <b>8 C</b>   | 54.40  |              | <b>8 C</b> | 54.48  |         |
| <b>H</b>     | 4.53   |              | <b>H</b>   | 4.51   |         |
| <b>9 N</b>   |        |              | <b>9 N</b> |        |         |
| <b>H</b>     | 4.95   |              | <b>H</b>   | 4.95   |         |
| <b>10 C</b>  | 171.30 | <b>10 C</b>  | 171.41     |        |         |
| <b>11 O</b>  |        | <b>11 O</b>  |            |        |         |
| <b>12 O</b>  |        | <b>12 O</b>  |            |        |         |
| <b>13 C</b>  | 155.05 | <b>13 C</b>  | 155.09     |        |         |
| <b>14 O</b>  |        | <b>14 O</b>  |            |        |         |
| <b>15 O</b>  |        | <b>15 O</b>  |            |        |         |
| <b>16 C</b>  | 79.73  | <b>16 C</b>  | 79.72      |        |         |
| <b>17 C</b>  | 28.26  | <b>17 C</b>  | 28.25      |        |         |
| <b>H3</b>    | 1.37   | <b>H3</b>    | 1.35       |        |         |
| <b>18 C</b>  | 28.26  | <b>18 C</b>  | 28.25      |        |         |
| <b>H3</b>    | 1.37   | <b>H3</b>    | 1.35       |        |         |
| <b>19 C</b>  | 28.26  | <b>19 C</b>  | 28.25      |        |         |
| <b>H3</b>    | 1.37   | <b>H3</b>    | 1.35       |        |         |
| <b>20 C</b>  | 80.36  | <b>20 C</b>  | 80.33      |        |         |
| <b>H</b>     | 5.40   | <b>H</b>     | 5.38       |        |         |
| <b>21 C</b>  | 125.64 | <b>21 C</b>  | 125.74     |        |         |
| <b>H</b>     | 5.39   | <b>H</b>     | 5.41       |        |         |
| <b>22 C</b>  | 142.77 | <b>22 C</b>  | 142.63     |        |         |
| <b>H</b>     | 6.34   | <b>H</b>     | 6.30       |        |         |
| <b>23 C</b>  | 22.88  | <b>23 C</b>  | 22.87      |        |         |
| <b>23H H</b> | 1.95   | <b>23H H</b> | 1.93       |        |         |
| <b>24 C</b>  | 22.10  | <b>24 C</b>  | 21.99      |        |         |
| <b>24H H</b> | 1.75   | <b>24H H</b> | 1.65       |        |         |
| <b>25 C</b>  | 21.57  | <b>25 C</b>  | 21.60      |        |         |
| <b>H'</b>    | 0.00   | <b>H'</b>    | -0.01      |        |         |
| <b>H''</b>   | 1.01   | <b>H''</b>   | 0.99       |        |         |

### 3.10 Vibrational circular dichroism analysis

**Experimental:** 9.6 mg of **7-RRR** was dissolved in 150  $\mu\text{l}$   $\text{CDCl}_3$  and 7.2 mg **7-SSS** in 113  $\mu\text{l}$   $\text{CDCl}_3$ . The solutions were transferred to 0.100 mm  $\text{BaF}_2$  cells and VCD spectra acquired for six hours in a Biotools ChiralIR2X instrument. Resolution was  $4\text{ cm}^{-1}$ . A VCD spectrum of a sample of  $\text{CDCl}_3$  in the same cell was also acquired.

**Computational Spectral Simulations:** A Monte Carlo molecular mechanics search for low energy geometries was conducted for both diastereoisomers. *MacroModel* within the *Maestro* graphical interface (Schrödinger Inc.) was used to generate 135 (**7-RRR**) and 125 (**7-SSS**) starting coordinates for conformers within 5 kcal/mole of the lowest energy conformer. These conformers were initially minimized at B3LYP/6-31G(d) level in *Gaussian16*.<sup>5</sup> The energies of these conformations were examined, and all conformations greater than 2 kcal above the minimum and all duplicate conformations were discarded. This left 22 (**7-RRR**) and 19 (**7-SSS**) conformers which were used as starting point for further density functional theory (DFT) minimizations within *Gaussian16* at the B3PW91/cc-pVTZ level.

Optimized structures, harmonic vibrational frequencies/intensities, VCD rotational strengths, and free energies at STP (including zero-point energies) were determined at B3PW91/cc-pVTZ level of theory. For the **7-RRR** diastereoisomer, six conformations were found contributing to the solution conformation at a level greater than 10%. For the **7-SSS** diastereoisomer, four conformations were found contributing to the solution conformation at a level greater than 10%.

For both diastereoisomers, an in-house program was used to generate Boltzmann-weighted IR and VCD spectra from the selected conformations and fit Lorentzian line shapes ( $12\text{ cm}^{-1}$  line width) to the computed spectra thereby allowing direct comparisons between simulated and experimental spectra.

### Fit between calculated and experimental IR spectra:

There is a good fit between calculated (red and green) and experimental (blue and pink) IR spectra for both diastereoisomers, shown below in Figure S24. The IR spectrum of the  $\text{CDCl}_3$  blank was subtracted from the spectra below. Note that the two experimental IR spectra are essentially identical, and the two calculated spectra show only small differences.

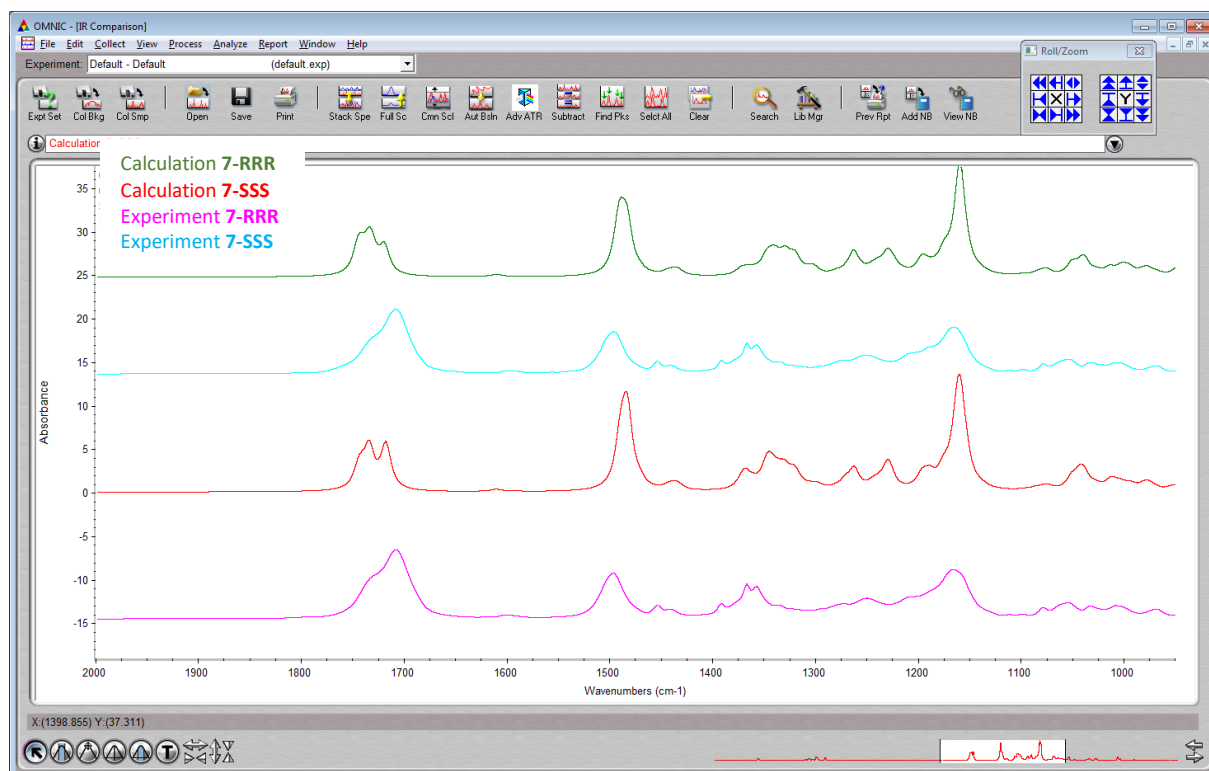

**Figure S24:** Calculated and experimental IR signature for **7**.



### Fit between calculated and experimental VCD spectra:

The experimental spectrum for the CDCl<sub>3</sub> blank was subtracted from both experimental spectra. These two experimental spectra are shown in Figure S25 in red and dark green (below). The two calculated spectra are shown in purple (**7-RRR**) and light green (**7-SSS**).

First to note is that the spectra are complicated, and that there are many similarities between the calculated spectra for the two diastereoisomers and both experimental spectra. Therefore, the analysis described here concentrates on the differences between the spectra of the diastereoisomers.

The IR spectra were used to assign bands in the VCD spectrum. The experimental wavenumber, calculated wavenumber (according to the assignment) and sign observed are recorded in the Table S7 below. This shows a clear match between measured and calculated signs for the **7-RRR** diastereoisomer.

**Table S7:** List of important calculated and experimental VCD signatures for **7-RRR**.

| Experimental wavenumber (cm <sup>-1</sup> ) | Calculated wavenumber for matching peak (cm <sup>-1</sup> ) | Measured signs in experimental VCD spectrum | Calculated signs for <b>7-RRR</b> diastereoisomer |
|---------------------------------------------|-------------------------------------------------------------|---------------------------------------------|---------------------------------------------------|
| 1590                                        | 1610                                                        | -                                           | -                                                 |
| 1440                                        | 1440                                                        | +                                           | +                                                 |
| 1295                                        | 1295                                                        | +                                           | +                                                 |
| 1260                                        | 1260                                                        | +                                           | +                                                 |
| 1110                                        | 1095                                                        | +                                           | +                                                 |
| 1050                                        | 1040                                                        | +                                           | +                                                 |
| 1000                                        | 1000                                                        | +                                           | +                                                 |
| 970                                         | 980                                                         | +                                           | +                                                 |

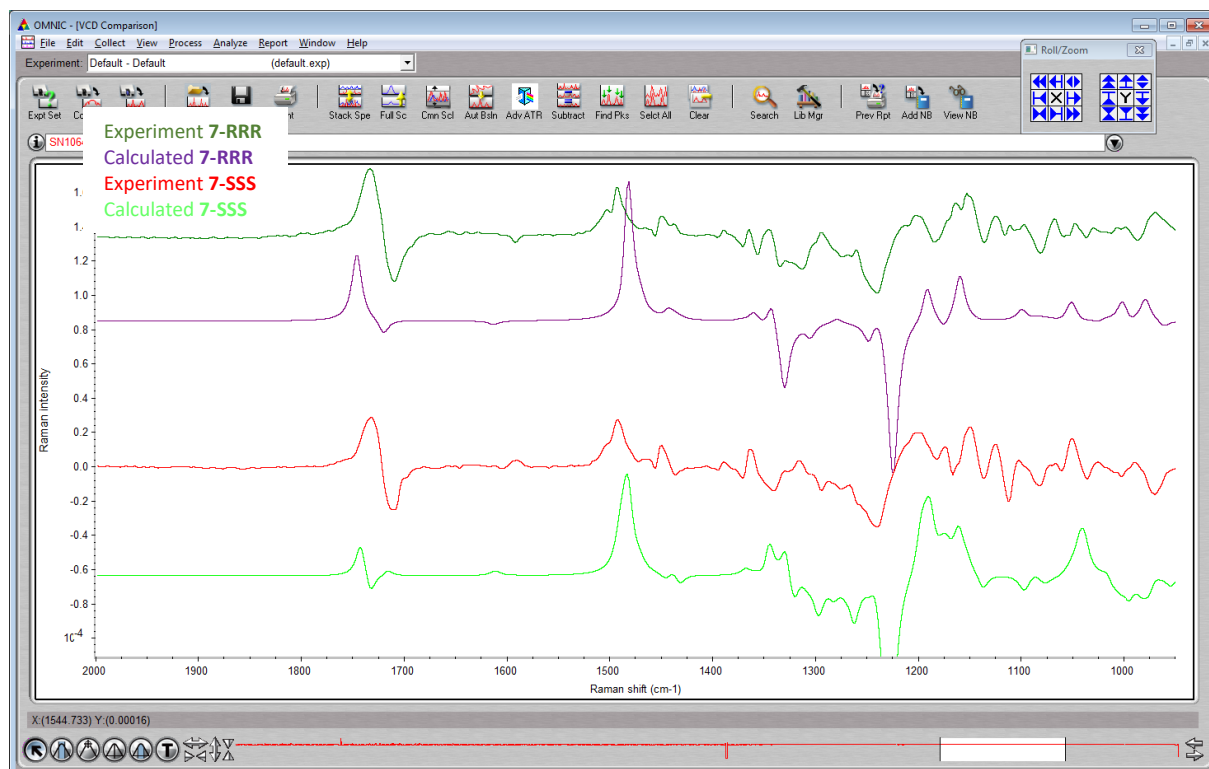

**Figure S25:** Experimental and calculated VCD spectra of **7**.

A difference spectrum was also calculated for the two experimental and two calculated spectra. In the Figure S26 below, the difference in the experimental spectra is shown in blue (**7-RRR** – **7-SSS**), and the calculated spectra in red (**7-SSS** – **7-RRR**) and purple (**7-RRR** – **7-SSS**). The good match between blue and purple spectra confirms the assignment of experimental spectra and calculated data for the **7-RRR** diastereomer.

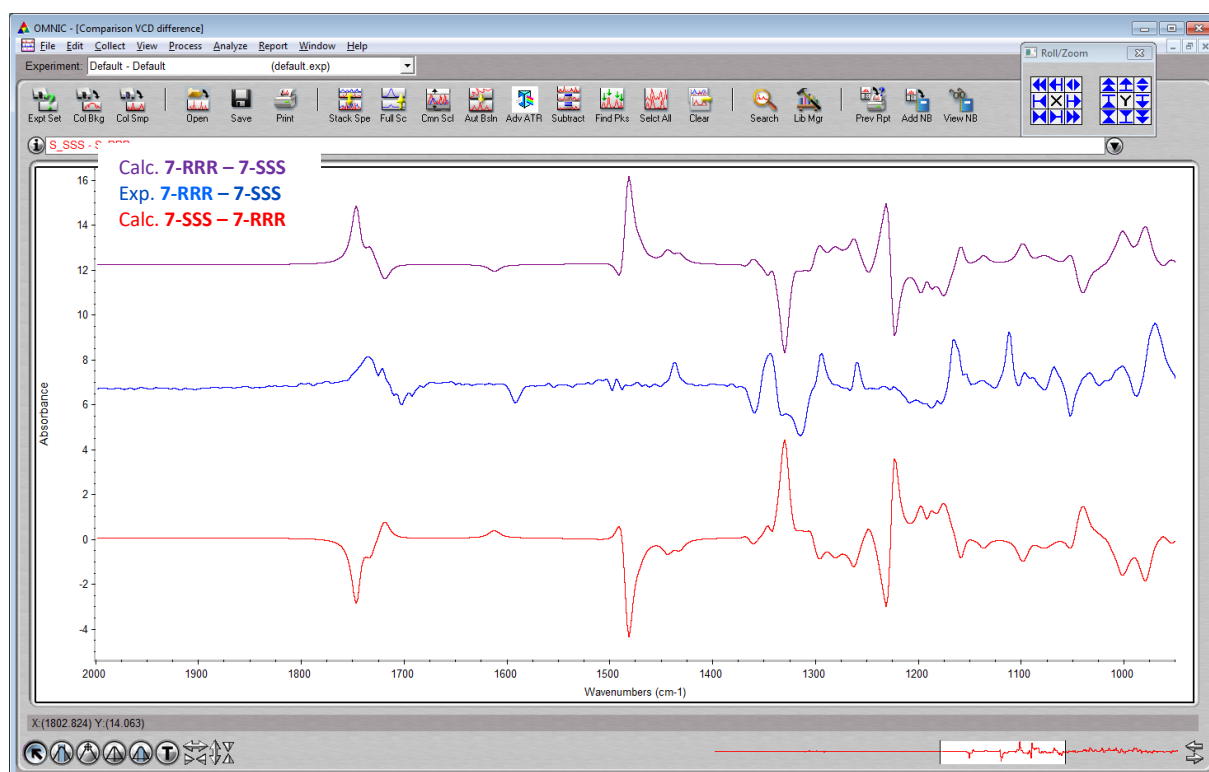

**Figure S26:** Experimental and calculated difference VCD spectra of **7**.

### 3.11 X-ray crystallography analysis

#### **X-ray Crystallography**

Single crystal of **7** crystallized as a mixture of diastereomers **7-RRR** and **7-SSS** has been collected on a Bruker D8 APEX-II equipped with a CCD camera using Mo K $\alpha$  radiation ( $\lambda = 0.71073 \text{ \AA}$ ). Crystal was mounted on a fibre loop and fixated using Fomblin oil. The data was collected at 150(2) K. Data reduction was performed with SAINT.<sup>1</sup> Absorption corrections for the area detector were performed using SADABS.<sup>2</sup> The structure was solved by direct methods and refined by least squares methods on F2 using the SHELX and the OLEX2 suit of programs.<sup>3</sup> Non-hydrogen atoms were refined anisotropically. Few of the carbon atoms have been restricted using SADI and RIGU constraints. Hydrogen atoms were constrained in geometrical positions to their parent atoms. Crystal was partially twinned and therefore twin matrix applied which is generated by Olex2 program. Further details can be found in the cif file.

- (1) Bruker, Bruker AXS Inc., Madison, Wisconsin, USA, 2007.
- (2) Bruker, Bruker AXS Inc., Madison, Wisconsin, USA, 2001.
- (3) (a) G. Sheldrick, Acta Crystallogr., Sect. A: Found. Crystallogr. 2008, A64, 112-122; (b) O. V. Dolomanov, L. J. Bourhis, R. J. Gildea, J. A. K. Howard, H. Puschmann, J. Appl. Crystallogr. 2009, 42, 339-341.

**Table S8:** Crystal data and structure refinement for **7**.

|                                   |                                                  |                 |
|-----------------------------------|--------------------------------------------------|-----------------|
| Identification code               | ag_ag_515_0m_a                                   |                 |
| Empirical formula                 | C <sub>20</sub> H <sub>25</sub> N O <sub>4</sub> |                 |
| Formula weight                    | 343.41                                           |                 |
| Temperature                       | 150 K                                            |                 |
| Wavelength                        | 0.71073 Å                                        |                 |
| Crystal system                    | Monoclinic                                       |                 |
| Space group                       | P 1 21 1                                         |                 |
| Unit cell dimensions              | a = 5.1902(10) Å                                 | α = 90°.        |
|                                   | b = 37.256(7) Å                                  | β = 90.248(4)°. |
|                                   | c = 9.5140(18) Å                                 | γ = 90°.        |
| Volume                            | 1839.7(6) Å <sup>3</sup>                         |                 |
| Z                                 | 4                                                |                 |
| Density (calculated)              | 1.240 Mg/m <sup>3</sup>                          |                 |
| Absorption coefficient            | 0.086 mm <sup>-1</sup>                           |                 |
| F(000)                            | 736                                              |                 |
| Crystal size                      | 0.2 x 0.1 x 0.07 mm <sup>3</sup>                 |                 |
| Theta range for data collection   | 1.640 to 24.995°.                                |                 |
| Index ranges                      | -6 ≤ h ≤ 6, -44 ≤ k ≤ 44, -11 ≤ l ≤ 11           |                 |
| Reflections collected             | 32095                                            |                 |
| Independent reflections           | 6452 [R(int) = 0.0928]                           |                 |
| Completeness to theta = 24.995°   | 99.9 %                                           |                 |
| Absorption correction             | Semi-empirical from equivalents                  |                 |
| Max. and min. transmission        | 0.7457 and 0.6717                                |                 |
| Refinement method                 | Full-matrix least-squares on F <sup>2</sup>      |                 |
| Data / restraints / parameters    | 6452 / 47 / 459                                  |                 |
| Goodness-of-fit on F <sup>2</sup> | 1.045                                            |                 |
| Final R indices [I > 2σ(I)]       | R1 = 0.0673, wR2 = 0.1633                        |                 |
| R indices (all data)              | R1 = 0.1016, wR2 = 0.1846                        |                 |
| Absolute structure parameter      | 0.3(7)                                           |                 |

|                             |                                    |
|-----------------------------|------------------------------------|
| Extinction coefficient      | 0.017(3)                           |
| Largest diff. peak and hole | 0.456 and -0.263 e.Å <sup>-3</sup> |

**Table S9:** Atomic coordinates ( $\times 10^4$ ) and equivalent isotropic displacement parameters ( $\text{\AA}^2 \times 10^3$ ) for **7**.  $U(\text{eq})$  is defined as one third of the trace of the orthogonalized  $U^{\text{ij}}$  tensor.

|       | x         | y       | z         | $U(\text{eq})$ |
|-------|-----------|---------|-----------|----------------|
| O(7)  | 13047(8)  | 3746(1) | 3345(4)   | 35(1)          |
| O(1)  | 4494(7)   | 6287(1) | 7513(4)   | 37(1)          |
| O(8)  | 10232(7)  | 3748(1) | 1492(4)   | 35(1)          |
| O(2)  | 1797(8)   | 6285(1) | 9390(4)   | 36(1)          |
| N(1)  | 6158(9)   | 6272(2) | 9632(5)   | 31(1)          |
| N(2)  | 8732(9)   | 3764(2) | 3623(5)   | 30(1)          |
| O(6)  | 5453(12)  | 3922(2) | 6724(6)   | 63(2)          |
| C(5)  | 3945(11)  | 6283(2) | 8877(6)   | 29(1)          |
| O(3)  | 7874(13)  | 5694(1) | 10872(6)  | 65(2)          |
| O(5)  | 7240(13)  | 4318(2) | 5272(7)   | 74(2)          |
| C(25) | 10853(11) | 3749(2) | 2868(6)   | 29(1)          |
| O(4)  | 8949(14)  | 5980(2) | 12797(7)  | 80(2)          |
| C(28) | 9472(13)  | 3042(2) | 4997(7)   | 36(2)          |
| C(1)  | 2458(12)  | 6296(2) | 6426(6)   | 35(2)          |
| C(14) | 7836(14)  | 5974(2) | 11712(8)  | 39(2)          |
| C(6)  | 6250(12)  | 6279(2) | 11147(6)  | 30(1)          |
| C(22) | 12224(12) | 3721(2) | 393(6)    | 34(2)          |
| C(8)  | 5589(12)  | 6953(2) | 11290(7)  | 34(2)          |
| C(7)  | 7290(14)  | 6636(2) | 11682(8)  | 38(2)          |
| C(9)  | 6025(15)  | 7138(2) | 10050(8)  | 45(2)          |
| C(34) | 6974(14)  | 3990(2) | 5825(7)   | 38(2)          |
| C(26) | 8700(12)  | 3715(2) | 5120(6)   | 32(1)          |
| C(27) | 7783(13)  | 3344(2) | 5553(8)   | 39(2)          |
| C(29) | 11556(13) | 2919(2) | 5791(8)   | 46(2)          |
| C(4)  | 947(15)   | 6640(2) | 6555(9)   | 46(2)          |
| C(2)  | 791(14)   | 5963(2) | 6532(8)   | 45(2)          |
| C(23) | 13962(13) | 4044(2) | 442(8)    | 41(2)          |
| C(12) | 2057(16)  | 7345(2) | 11753(10) | 57(2)          |
| C(30) | 13085(15) | 2640(2) | 5314(12)  | 64(3)          |
| C(33) | 9020(15)  | 2887(2) | 3715(8)   | 45(2)          |
| C(13) | 3599(13)  | 7055(2) | 12127(8)  | 45(2)          |
| C(21) | 13660(16) | 3370(2) | 551(9)    | 51(2)          |

|        |           |         |           |         |
|--------|-----------|---------|-----------|---------|
| C(31)  | 12583(17) | 2485(2) | 4053(12)  | 62(2)   |
| C(32)  | 10584(16) | 2608(2) | 3226(10)  | 54(2)   |
| C(11)  | 2517(18)  | 7524(2) | 10528(11) | 64(3)   |
| C(3)   | 3983(14)  | 6293(3) | 5082(7)   | 57(2)   |
| C(10)  | 4498(18)  | 7425(2) | 9684(11)  | 64(2)   |
| C(24)  | 10600(14) | 3720(3) | -941(7)   | 59(2)   |
| C(17)  | 10670(30) | 4963(3) | 9627(13)  | 92(4)   |
| C(15)  | 9610(20)  | 5397(2) | 11264(12) | 83(4)   |
| C(18)  | 8730(30)  | 4806(3) | 10529(19) | 106(5)  |
| C(16)  | 11380(30) | 5286(4) | 10127(18) | 118(5)  |
| C(19)  | 8120(30)  | 5076(3) | 11501(19) | 134(6)  |
| C(20)  | 9580(40)  | 4733(4) | 11910(20) | 153(7)  |
| C(3AA) | 6260(20)  | 5211(2) | 5328(10)  | 67(2)   |
| C(0AA) | 5810(30)  | 4612(4) | 6130(20)  | 167(8)  |
| C(4AA) | 7190(40)  | 4913(4) | 6335(17)  | 142(6)  |
| C(5AA) | 6130(30)  | 5208(5) | 6864(14)  | 120(4)  |
| C(2AA) | 4330(40)  | 5031(6) | 4651(15)  | 200(11) |
| C(1AA) | 4020(40)  | 4678(5) | 5236(18)  | 153(7)  |

---

**Table S10:** Bond lengths [ $\text{\AA}$ ] and angles [ $^\circ$ ] for **7**.

---

|             |           |
|-------------|-----------|
| O(7)-C(25)  | 1.224(7)  |
| O(1)-C(5)   | 1.329(7)  |
| O(1)-C(1)   | 1.476(7)  |
| O(8)-C(25)  | 1.347(7)  |
| O(8)-C(22)  | 1.478(7)  |
| O(2)-C(5)   | 1.219(7)  |
| N(1)-H(1)   | 0.8800    |
| N(1)-C(5)   | 1.353(8)  |
| N(1)-C(6)   | 1.442(8)  |
| N(2)-H(2)   | 0.8800    |
| N(2)-C(25)  | 1.319(8)  |
| N(2)-C(26)  | 1.435(8)  |
| O(6)-C(34)  | 1.194(8)  |
| O(3)-C(14)  | 1.312(9)  |
| O(3)-C(15)  | 1.474(10) |
| O(5)-C(34)  | 1.336(9)  |
| O(5)-C(0AA) | 1.559(16) |
| O(4)-C(14)  | 1.181(8)  |
| C(28)-C(27) | 1.521(10) |
| C(28)-C(29) | 1.395(10) |
| C(28)-C(33) | 1.369(10) |
| C(1)-C(4)   | 1.506(10) |
| C(1)-C(2)   | 1.517(10) |
| C(1)-C(3)   | 1.507(10) |
| C(14)-C(6)  | 1.504(9)  |
| C(6)-H(6)   | 1.0000    |
| C(6)-C(7)   | 1.520(9)  |
| C(22)-C(23) | 1.503(10) |
| C(22)-C(21) | 1.514(10) |
| C(22)-C(24) | 1.520(9)  |
| C(8)-C(7)   | 1.520(10) |
| C(8)-C(9)   | 1.385(10) |
| C(8)-C(13)  | 1.361(10) |
| C(7)-H(7A)  | 0.9900    |
| C(7)-H(7B)  | 0.9900    |
| C(9)-H(9)   | 0.9500    |



|              |           |
|--------------|-----------|
| C(9)-C(10)   | 1.377(11) |
| C(34)-C(26)  | 1.520(10) |
| C(26)-H(26)  | 1.0000    |
| C(26)-C(27)  | 1.519(9)  |
| C(27)-H(27A) | 0.9900    |
| C(27)-H(27B) | 0.9900    |
| C(29)-H(29)  | 0.9500    |
| C(29)-C(30)  | 1.384(13) |
| C(4)-H(4A)   | 0.9800    |
| C(4)-H(4B)   | 0.9800    |
| C(4)-H(4C)   | 0.9800    |
| C(2)-H(2A)   | 0.9800    |
| C(2)-H(2B)   | 0.9800    |
| C(2)-H(2C)   | 0.9800    |
| C(23)-H(23A) | 0.9800    |
| C(23)-H(23B) | 0.9800    |
| C(23)-H(23C) | 0.9800    |
| C(12)-H(12)  | 0.9500    |
| C(12)-C(13)  | 1.390(12) |
| C(12)-C(11)  | 1.363(13) |
| C(30)-H(30)  | 0.9500    |
| C(30)-C(31)  | 1.357(14) |
| C(33)-H(33)  | 0.9500    |
| C(33)-C(32)  | 1.401(10) |
| C(13)-H(13)  | 0.9500    |
| C(21)-H(21A) | 0.9800    |
| C(21)-H(21B) | 0.9800    |
| C(21)-H(21C) | 0.9800    |
| C(31)-H(31)  | 0.9500    |
| C(31)-C(32)  | 1.378(12) |
| C(32)-H(32)  | 0.9500    |
| C(11)-H(11)  | 0.9500    |
| C(11)-C(10)  | 1.358(14) |
| C(3)-H(3A)   | 0.9800    |
| C(3)-H(3B)   | 0.9800    |
| C(3)-H(3C)   | 0.9800    |
| C(10)-H(10)  | 0.9500    |

|                  |           |
|------------------|-----------|
| C(24)-H(24A)     | 0.9800    |
| C(24)-H(24B)     | 0.9800    |
| C(24)-H(24C)     | 0.9800    |
| C(17)-H(17)      | 0.9500    |
| C(17)-C(18)      | 1.449(19) |
| C(17)-C(16)      | 1.346(19) |
| C(15)-H(15)      | 1.0000    |
| C(15)-C(16)      | 1.482(19) |
| C(15)-C(19)      | 1.439(17) |
| C(18)-H(18)      | 1.0000    |
| C(18)-C(19)      | 1.40(2)   |
| C(18)-C(20)      | 1.41(2)   |
| C(16)-H(16)      | 0.9500    |
| C(19)-H(19)      | 1.0000    |
| C(19)-C(20)      | 1.534(17) |
| C(20)-H(20A)     | 0.9900    |
| C(20)-H(20B)     | 0.9900    |
| C(3AA)-H(3AA)    | 1.0000    |
| C(3AA)-C(4AA)    | 1.540(18) |
| C(3AA)-C(5AA)    | 1.463(15) |
| C(3AA)-C(2AA)    | 1.361(16) |
| C(0AA)-H(0AA)    | 1.0000    |
| C(0AA)-C(4AA)    | 1.344(18) |
| C(0AA)-C(1AA)    | 1.280(19) |
| C(4AA)-H(4AA)    | 1.0000    |
| C(4AA)-C(5AA)    | 1.328(19) |
| C(5AA)-H(5AA)    | 0.9900    |
| C(5AA)-H(5AB)    | 0.9900    |
| C(2AA)-H(2AA)    | 0.9500    |
| C(2AA)-C(1AA)    | 1.437(19) |
| C(1AA)-H(1AA)    | 0.9500    |
| C(5)-O(1)-C(1)   | 121.9(5)  |
| C(25)-O(8)-C(22) | 121.5(4)  |
| C(5)-N(1)-H(1)   | 118.2     |
| C(5)-N(1)-C(6)   | 123.7(5)  |
| C(6)-N(1)-H(1)   | 118.2     |
| C(25)-N(2)-H(2)  | 118.4     |

|                   |          |
|-------------------|----------|
| C(25)-N(2)-C(26)  | 123.2(5) |
| C(26)-N(2)-H(2)   | 118.4    |
| O(1)-C(5)-N(1)    | 109.5(5) |
| O(2)-C(5)-O(1)    | 126.2(5) |
| O(2)-C(5)-N(1)    | 124.3(6) |
| C(14)-O(3)-C(15)  | 117.0(6) |
| C(34)-O(5)-C(0AA) | 112.7(7) |
| O(7)-C(25)-O(8)   | 125.4(5) |
| O(7)-C(25)-N(2)   | 125.2(5) |
| N(2)-C(25)-O(8)   | 109.4(5) |
| C(29)-C(28)-C(27) | 120.1(7) |
| C(33)-C(28)-C(27) | 121.7(6) |
| C(33)-C(28)-C(29) | 118.2(7) |
| O(1)-C(1)-C(4)    | 109.6(5) |
| O(1)-C(1)-C(2)    | 109.9(5) |
| O(1)-C(1)-C(3)    | 102.6(5) |
| C(4)-C(1)-C(2)    | 113.1(6) |
| C(4)-C(1)-C(3)    | 110.5(6) |
| C(3)-C(1)-C(2)    | 110.6(6) |
| O(3)-C(14)-C(6)   | 113.1(6) |
| O(4)-C(14)-O(3)   | 122.6(7) |
| O(4)-C(14)-C(6)   | 124.2(7) |
| N(1)-C(6)-C(14)   | 111.0(5) |
| N(1)-C(6)-H(6)    | 108.0    |
| N(1)-C(6)-C(7)    | 111.2(5) |
| C(14)-C(6)-H(6)   | 108.0    |
| C(14)-C(6)-C(7)   | 110.4(5) |
| C(7)-C(6)-H(6)    | 108.0    |
| O(8)-C(22)-C(23)  | 110.2(5) |
| O(8)-C(22)-C(21)  | 109.6(5) |
| O(8)-C(22)-C(24)  | 101.8(5) |
| C(23)-C(22)-C(21) | 113.2(5) |
| C(23)-C(22)-C(24) | 111.0(6) |
| C(21)-C(22)-C(24) | 110.5(6) |
| C(9)-C(8)-C(7)    | 119.9(6) |
| C(13)-C(8)-C(7)   | 121.0(6) |
| C(13)-C(8)-C(9)   | 119.2(7) |

|                     |          |
|---------------------|----------|
| C(6)-C(7)-H(7A)     | 109.0    |
| C(6)-C(7)-H(7B)     | 109.0    |
| C(8)-C(7)-C(6)      | 113.1(5) |
| C(8)-C(7)-H(7A)     | 109.0    |
| C(8)-C(7)-H(7B)     | 109.0    |
| H(7A)-C(7)-H(7B)    | 107.8    |
| C(8)-C(9)-H(9)      | 119.8    |
| C(10)-C(9)-C(8)     | 120.4(8) |
| C(10)-C(9)-H(9)     | 119.8    |
| O(6)-C(34)-O(5)     | 123.1(7) |
| O(6)-C(34)-C(26)    | 124.5(7) |
| O(5)-C(34)-C(26)    | 112.4(6) |
| N(2)-C(26)-C(34)    | 111.2(5) |
| N(2)-C(26)-H(26)    | 108.2    |
| N(2)-C(26)-C(27)    | 112.9(5) |
| C(34)-C(26)-H(26)   | 108.2    |
| C(27)-C(26)-C(34)   | 108.0(6) |
| C(27)-C(26)-H(26)   | 108.2    |
| C(28)-C(27)-H(27A)  | 108.9    |
| C(28)-C(27)-H(27B)  | 108.9    |
| C(26)-C(27)-C(28)   | 113.3(6) |
| C(26)-C(27)-H(27A)  | 108.9    |
| C(26)-C(27)-H(27B)  | 108.9    |
| H(27A)-C(27)-H(27B) | 107.7    |
| C(28)-C(29)-H(29)   | 119.5    |
| C(30)-C(29)-C(28)   | 120.9(8) |
| C(30)-C(29)-H(29)   | 119.5    |
| C(1)-C(4)-H(4A)     | 109.5    |
| C(1)-C(4)-H(4B)     | 109.5    |
| C(1)-C(4)-H(4C)     | 109.5    |
| H(4A)-C(4)-H(4B)    | 109.5    |
| H(4A)-C(4)-H(4C)    | 109.5    |
| H(4B)-C(4)-H(4C)    | 109.5    |
| C(1)-C(2)-H(2A)     | 109.5    |
| C(1)-C(2)-H(2B)     | 109.5    |
| C(1)-C(2)-H(2C)     | 109.5    |
| H(2A)-C(2)-H(2B)    | 109.5    |

|                     |          |
|---------------------|----------|
| H(2A)-C(2)-H(2C)    | 109.5    |
| H(2B)-C(2)-H(2C)    | 109.5    |
| C(22)-C(23)-H(23A)  | 109.5    |
| C(22)-C(23)-H(23B)  | 109.5    |
| C(22)-C(23)-H(23C)  | 109.5    |
| H(23A)-C(23)-H(23B) | 109.5    |
| H(23A)-C(23)-H(23C) | 109.5    |
| H(23B)-C(23)-H(23C) | 109.5    |
| C(13)-C(12)-H(12)   | 120.1    |
| C(11)-C(12)-H(12)   | 120.1    |
| C(11)-C(12)-C(13)   | 119.7(8) |
| C(29)-C(30)-H(30)   | 119.9    |
| C(31)-C(30)-C(29)   | 120.1(8) |
| C(31)-C(30)-H(30)   | 119.9    |
| C(28)-C(33)-H(33)   | 119.6    |
| C(28)-C(33)-C(32)   | 120.8(7) |
| C(32)-C(33)-H(33)   | 119.6    |
| C(8)-C(13)-C(12)    | 120.3(8) |
| C(8)-C(13)-H(13)    | 119.9    |
| C(12)-C(13)-H(13)   | 119.9    |
| C(22)-C(21)-H(21A)  | 109.5    |
| C(22)-C(21)-H(21B)  | 109.5    |
| C(22)-C(21)-H(21C)  | 109.5    |
| H(21A)-C(21)-H(21B) | 109.5    |
| H(21A)-C(21)-H(21C) | 109.5    |
| H(21B)-C(21)-H(21C) | 109.5    |
| C(30)-C(31)-H(31)   | 119.9    |
| C(30)-C(31)-C(32)   | 120.3(8) |
| C(32)-C(31)-H(31)   | 119.9    |
| C(33)-C(32)-H(32)   | 120.2    |
| C(31)-C(32)-C(33)   | 119.6(8) |
| C(31)-C(32)-H(32)   | 120.2    |
| C(12)-C(11)-H(11)   | 119.7    |
| C(10)-C(11)-C(12)   | 120.6(8) |
| C(10)-C(11)-H(11)   | 119.7    |
| C(1)-C(3)-H(3A)     | 109.5    |
| C(1)-C(3)-H(3B)     | 109.5    |

|                     |           |
|---------------------|-----------|
| C(1)-C(3)-H(3C)     | 109.5     |
| H(3A)-C(3)-H(3B)    | 109.5     |
| H(3A)-C(3)-H(3C)    | 109.5     |
| H(3B)-C(3)-H(3C)    | 109.5     |
| C(9)-C(10)-H(10)    | 120.1     |
| C(11)-C(10)-C(9)    | 119.8(9)  |
| C(11)-C(10)-H(10)   | 120.1     |
| C(22)-C(24)-H(24A)  | 109.5     |
| C(22)-C(24)-H(24B)  | 109.5     |
| C(22)-C(24)-H(24C)  | 109.5     |
| H(24A)-C(24)-H(24B) | 109.5     |
| H(24A)-C(24)-H(24C) | 109.5     |
| H(24B)-C(24)-H(24C) | 109.5     |
| C(18)-C(17)-H(17)   | 125.0     |
| C(16)-C(17)-H(17)   | 125.0     |
| C(16)-C(17)-C(18)   | 110.0(12) |
| O(3)-C(15)-H(15)    | 110.1     |
| O(3)-C(15)-C(16)    | 113.9(10) |
| C(16)-C(15)-H(15)   | 110.1     |
| C(19)-C(15)-O(3)    | 109.8(10) |
| C(19)-C(15)-H(15)   | 110.1     |
| C(19)-C(15)-C(16)   | 102.6(10) |
| C(17)-C(18)-H(18)   | 119.7     |
| C(19)-C(18)-C(17)   | 105.1(10) |
| C(19)-C(18)-H(18)   | 119.7     |
| C(19)-C(18)-C(20)   | 66.1(11)  |
| C(20)-C(18)-C(17)   | 114.3(13) |
| C(20)-C(18)-H(18)   | 119.7     |
| C(17)-C(16)-C(15)   | 109.6(11) |
| C(17)-C(16)-H(16)   | 125.2     |
| C(15)-C(16)-H(16)   | 125.2     |
| C(15)-C(19)-H(19)   | 118.4     |
| C(15)-C(19)-C(20)   | 117.9(14) |
| C(18)-C(19)-C(15)   | 111.7(13) |
| C(18)-C(19)-H(19)   | 118.4     |
| C(18)-C(19)-C(20)   | 57.2(9)   |
| C(20)-C(19)-H(19)   | 118.4     |

|                      |           |
|----------------------|-----------|
| C(18)-C(20)-C(19)    | 56.7(10)  |
| C(18)-C(20)-H(20A)   | 118.1     |
| C(18)-C(20)-H(20B)   | 118.1     |
| C(19)-C(20)-H(20A)   | 118.1     |
| C(19)-C(20)-H(20B)   | 118.1     |
| H(20A)-C(20)-H(20B)  | 115.3     |
| C(4AA)-C(3AA)-H(3AA) | 121.8     |
| C(5AA)-C(3AA)-H(3AA) | 121.8     |
| C(5AA)-C(3AA)-C(4AA) | 52.4(8)   |
| C(2AA)-C(3AA)-H(3AA) | 121.8     |
| C(2AA)-C(3AA)-C(4AA) | 99.6(12)  |
| C(2AA)-C(3AA)-C(5AA) | 115.7(12) |
| O(5)-C(0AA)-H(0AA)   | 111.9     |
| C(4AA)-C(0AA)-O(5)   | 114.1(12) |
| C(4AA)-C(0AA)-H(0AA) | 111.9     |
| C(1AA)-C(0AA)-O(5)   | 97.6(17)  |
| C(1AA)-C(0AA)-H(0AA) | 111.9     |
| C(1AA)-C(0AA)-C(4AA) | 108.5(14) |
| C(3AA)-C(4AA)-H(4AA) | 117.0     |
| C(0AA)-C(4AA)-C(3AA) | 110.3(13) |
| C(0AA)-C(4AA)-H(4AA) | 117.0     |
| C(5AA)-C(4AA)-C(3AA) | 60.8(8)   |
| C(5AA)-C(4AA)-C(0AA) | 122(2)    |
| C(5AA)-C(4AA)-H(4AA) | 117.0     |
| C(3AA)-C(5AA)-H(5AA) | 117.0     |
| C(3AA)-C(5AA)-H(5AB) | 117.0     |
| C(4AA)-C(5AA)-C(3AA) | 66.8(11)  |
| C(4AA)-C(5AA)-H(5AA) | 117.0     |
| C(4AA)-C(5AA)-H(5AB) | 117.0     |
| H(5AA)-C(5AA)-H(5AB) | 114.1     |
| C(3AA)-C(2AA)-H(2AA) | 124.8     |
| C(3AA)-C(2AA)-C(1AA) | 110.5(14) |
| C(1AA)-C(2AA)-H(2AA) | 124.8     |
| C(0AA)-C(1AA)-C(2AA) | 110.6(15) |
| C(0AA)-C(1AA)-H(1AA) | 124.7     |
| C(2AA)-C(1AA)-H(1AA) | 124.7     |

---

Symmetry transformations used to generate equivalent atoms:

**Table S11:** Anisotropic displacement parameters ( $\text{\AA}^2 \times 10^3$ ) for **7**. The anisotropic displacement factor exponent takes the form:  $-2\pi^2 [ h^2 a^{*2}U^{11} + \dots + 2 h k a^* b^* U^{12} ]$

|       | U <sup>11</sup> | U <sup>22</sup> | U <sup>33</sup> | U <sup>23</sup> | U <sup>13</sup> | U <sup>12</sup> |
|-------|-----------------|-----------------|-----------------|-----------------|-----------------|-----------------|
| O(7)  | 21(2)           | 51(3)           | 33(2)           | 7(2)            | -3(2)           | -5(2)           |
| O(1)  | 22(2)           | 60(3)           | 28(2)           | 2(2)            | -5(2)           | 6(2)            |
| O(8)  | 21(2)           | 59(3)           | 27(2)           | -1(2)           | 4(2)            | 1(2)            |
| O(2)  | 19(2)           | 46(3)           | 44(3)           | -2(2)           | 2(2)            | 0(2)            |
| N(1)  | 21(2)           | 42(3)           | 29(3)           | 0(2)            | 3(2)            | 2(3)            |
| N(2)  | 21(2)           | 44(3)           | 24(3)           | 3(2)            | -2(2)           | 2(3)            |
| O(6)  | 68(4)           | 67(4)           | 53(3)           | 1(3)            | 35(3)           | 5(3)            |
| C(5)  | 27(3)           | 26(3)           | 34(4)           | 4(3)            | -4(3)           | -1(3)           |
| O(3)  | 99(5)           | 29(3)           | 68(4)           | -4(2)           | -41(3)          | 15(3)           |
| O(5)  | 82(4)           | 39(3)           | 102(5)          | 2(3)            | 61(4)           | 6(3)            |
| C(25) | 20(3)           | 35(3)           | 32(3)           | 4(3)            | 0(3)            | -2(3)           |
| O(4)  | 106(5)          | 75(4)           | 57(4)           | -15(3)          | -44(4)          | 35(4)           |
| C(28) | 32(4)           | 35(4)           | 42(4)           | 8(3)            | 0(3)            | -11(3)          |
| C(1)  | 25(3)           | 50(4)           | 31(3)           | 2(3)            | -11(3)          | 2(3)            |
| C(14) | 38(4)           | 39(4)           | 40(4)           | 6(3)            | -6(3)           | -3(3)           |
| C(6)  | 29(3)           | 34(3)           | 27(3)           | -4(3)           | 1(2)            | -1(3)           |
| C(22) | 26(3)           | 51(4)           | 24(3)           | -3(3)           | 10(2)           | -5(3)           |
| C(8)  | 28(3)           | 39(4)           | 36(4)           | -8(3)           | -1(3)           | -6(3)           |
| C(7)  | 35(4)           | 44(4)           | 36(4)           | -4(3)           | -5(3)           | -7(3)           |
| C(9)  | 42(4)           | 40(4)           | 53(5)           | 5(3)            | -4(4)           | -1(3)           |
| C(34) | 35(4)           | 44(4)           | 35(4)           | -3(3)           | 6(3)            | -6(3)           |
| C(26) | 26(3)           | 42(4)           | 27(3)           | 4(3)            | -5(2)           | 1(3)            |
| C(27) | 30(4)           | 45(4)           | 41(4)           | -4(3)           | 4(3)            | -12(3)          |
| C(29) | 32(4)           | 49(4)           | 57(5)           | 22(4)           | -11(3)          | -10(4)          |
| C(4)  | 42(4)           | 43(4)           | 54(5)           | 2(4)            | -13(4)          | 5(4)            |
| C(2)  | 36(4)           | 42(4)           | 56(5)           | -10(4)          | -9(3)           | -2(3)           |
| C(23) | 31(4)           | 44(4)           | 48(5)           | 6(3)            | 9(3)            | 2(3)            |
| C(12) | 39(4)           | 48(5)           | 85(7)           | -32(5)          | 1(4)            | 1(4)            |
| C(30) | 32(4)           | 56(5)           | 105(8)          | 46(5)           | -4(4)           | -3(4)           |
| C(33) | 45(4)           | 38(4)           | 51(5)           | 1(3)            | -2(4)           | 0(3)            |
| C(13) | 34(4)           | 45(4)           | 55(5)           | -14(3)          | -2(3)           | -2(3)           |
| C(21) | 52(5)           | 41(4)           | 59(5)           | -13(4)          | 17(4)           | -6(4)           |



|        |         |         |         |         |         |          |
|--------|---------|---------|---------|---------|---------|----------|
| C(31)  | 45(5)   | 39(4)   | 102(8)  | 5(5)    | 1(5)    | 5(4)     |
| C(32)  | 55(5)   | 34(4)   | 72(6)   | -6(4)   | 7(4)    | 0(4)     |
| C(11)  | 52(6)   | 38(5)   | 101(8)  | 0(5)    | -19(5)  | 2(4)     |
| C(3)   | 36(4)   | 106(7)  | 28(4)   | 8(5)    | -5(3)   | 6(5)     |
| C(10)  | 57(6)   | 45(5)   | 91(7)   | 16(4)   | -7(5)   | 1(4)     |
| C(24)  | 40(4)   | 111(7)  | 27(4)   | -9(4)   | 6(3)    | -7(5)    |
| C(17)  | 119(10) | 77(8)   | 81(8)   | -1(6)   | -24(7)  | 35(8)    |
| C(15)  | 120(9)  | 30(4)   | 98(8)   | 0(4)    | -66(7)  | 22(5)    |
| C(18)  | 76(8)   | 57(7)   | 186(15) | -10(9)  | -4(9)   | -23(6)   |
| C(16)  | 84(9)   | 103(11) | 167(14) | 50(10)  | 21(9)   | -6(8)    |
| C(19)  | 141(13) | 47(7)   | 213(16) | 47(8)   | 71(12)  | 48(8)    |
| C(20)  | 191(18) | 60(8)   | 208(19) | 48(10)  | 23(15)  | 49(10)   |
| C(3AA) | 76(6)   | 46(5)   | 80(6)   | -5(4)   | 12(5)   | 4(4)     |
| C(0AA) | 83(9)   | 90(9)   | 330(20) | 103(12) | 94(11)  | 3(7)     |
| C(4AA) | 192(17) | 121(11) | 113(11) | -12(8)  | -55(11) | 22(9)    |
| C(5AA) | 118(11) | 146(12) | 95(8)   | 14(8)   | 2(8)    | -24(10)  |
| C(2AA) | 260(20) | 268(19) | 72(9)   | 58(11)  | -77(12) | -177(17) |
| C(1AA) | 176(15) | 136(12) | 146(13) | -92(10) | 64(11)  | -66(11)  |

---

**Table S12:** Hydrogen coordinates ( $\times 10^4$ ) and isotropic displacement parameters ( $\text{\AA}^2 \times 10^{-3}$ ) for **7**.

|        | x     | y    | z     | U(eq) |
|--------|-------|------|-------|-------|
| H(1)   | 7623  | 6259 | 9173  | 37    |
| H(2)   | 7263  | 3806 | 3189  | 36    |
| H(6)   | 4451  | 6251 | 11503 | 36    |
| H(7A)  | 7455  | 6625 | 12718 | 46    |
| H(7B)  | 9032  | 6675 | 11291 | 46    |
| H(9)   | 7386  | 7065 | 9448  | 54    |
| H(26)  | 10495 | 3748 | 5483  | 38    |
| H(27A) | 6001  | 3309 | 5205  | 46    |
| H(27B) | 7745  | 3331 | 6592  | 46    |
| H(29)  | 11932 | 3028 | 6672  | 55    |
| H(4A)  | -32   | 6637 | 7433  | 70    |
| H(4B)  | -244  | 6661 | 5757  | 70    |
| H(4C)  | 2135  | 6844 | 6557  | 70    |
| H(2A)  | 1893  | 5749 | 6558  | 67    |
| H(2B)  | -359  | 5950 | 5713  | 67    |
| H(2C)  | -238  | 5974 | 7392  | 67    |
| H(23A) | 12920 | 4263 | 393   | 61    |
| H(23B) | 15147 | 4037 | -357  | 61    |
| H(23C) | 14951 | 4042 | 1321  | 61    |
| H(12)  | 690   | 7418 | 12347 | 69    |
| H(30)  | 14488 | 2558 | 5871  | 77    |
| H(33)  | 7628  | 2970 | 3150  | 54    |
| H(13)  | 3262  | 6927 | 12971 | 54    |
| H(21A) | 14848 | 3385 | 1351  | 76    |
| H(21B) | 14636 | 3321 | -308  | 76    |
| H(21C) | 12425 | 3175 | 710   | 76    |
| H(31)  | 13614 | 2290 | 3739  | 75    |
| H(32)  | 10269 | 2504 | 2329  | 64    |
| H(11)  | 1441  | 7719 | 10263 | 77    |
| H(3A)  | 5010  | 6514 | 5019  | 85    |
| H(3B)  | 2801  | 6280 | 4277  | 85    |

|        |       |      |       |     |
|--------|-------|------|-------|-----|
| H(3C)  | 5131  | 6085 | 5074  | 85  |
| H(10)  | 4830  | 7555 | 8844  | 77  |
| H(24A) | 9336  | 3525 | -894  | 89  |
| H(24B) | 11717 | 3684 | -1757 | 89  |
| H(24C) | 9699  | 3950 | -1032 | 89  |
| H(17)  | 11343 | 4853 | 8805  | 111 |
| H(15)  | 10607 | 5460 | 12129 | 99  |
| H(18)  | 7314  | 4658 | 10106 | 127 |
| H(16)  | 12804 | 5423 | 9802  | 141 |
| H(19)  | 6292  | 5102 | 11807 | 161 |
| H(20A) | 11451 | 4752 | 12110 | 184 |
| H(20B) | 8654  | 4548 | 12454 | 184 |
| H(3AA) | 7494  | 5368 | 4812  | 81  |
| H(0AA) | 5105  | 4516 | 7032  | 200 |
| H(4AA) | 9089  | 4885 | 6455  | 171 |
| H(5AA) | 7285  | 5375 | 7373  | 144 |
| H(5AB) | 4399  | 5183 | 7289  | 144 |
| H(2AA) | 3339  | 5126 | 3897  | 240 |
| H(1AA) | 2679  | 4517 | 4992  | 183 |

---



---

**Alert level B**

|                   |                                                 |              |
|-------------------|-------------------------------------------------|--------------|
| PLAT035 ALERT 1 B | _chemical_absolute_configuration Info Not Given | Please Do !  |
| PLAT220 ALERT 2 B | Non-Solvent Resd 2 C Ueq(max)/Ueq(min) Range    | 6.9 Ratio    |
| PLAT230 ALERT 2 B | Hirshfeld Test Diff for O5 --C0AA               | 11.5 s.u.    |
| PLAT241 ALERT 2 B | High 'MainMol' Ueq as Compared to Neighbors of  | C2AA Check   |
| PLAT242 ALERT 2 B | Low 'MainMol' Ueq as Compared to Neighbors of   | C3AA Check   |
| PLAT340 ALERT 3 B | Low Bond Precision on C-C Bonds .....           | 0.01461 Ang. |
| PLAT360 ALERT 2 B | Short C(sp3)-C(sp3) Bond C4AA - C5AA            | 1.33 Ang.    |
| PLAT362 ALERT 2 B | Short C(sp3)-C(sp2) Bond C0AA - C1AA            | 1.28 Ang.    |

---

**Alert level C**

|                   |                                                 |                |
|-------------------|-------------------------------------------------|----------------|
| STRVA01 ALERT 4 C | Flack test results are meaningless.             |                |
|                   | From the CIF: _refine_ls_abs_structure_Flack    | 0.300          |
|                   | From the CIF: _refine_ls_abs_structure_Flack_su | 0.700          |
| PLAT089 ALERT 3 C | Poor Data / Parameter Ratio (Zmax < 18) .....   | 7.15 Note      |
| PLAT213 ALERT 2 C | Atom C19 has ADP max/min Ratio .....            | 3.3 prolat     |
| PLAT213 ALERT 2 C | Atom C0AA has ADP max/min Ratio .....           | 3.9 prolat     |
| PLAT213 ALERT 2 C | Atom C2AA has ADP max/min Ratio .....           | 3.2 prolat     |
| PLAT220 ALERT 2 C | Non-Solvent Resd 1 C Ueq(max)/Ueq(min) Range    | 5.3 Ratio      |
| PLAT222 ALERT 3 C | Non-Solv. Resd 1 H Uiso(max)/Uiso(min) Range    | 5.1 Ratio      |
| PLAT222 ALERT 3 C | Non-Solv. Resd 2 H Uiso(max)/Uiso(min) Range    | 6.7 Ratio      |
| PLAT234 ALERT 4 C | Large Hirshfeld Difference C16 --C17            | 0.22 Ang.      |
| PLAT234 ALERT 4 C | Large Hirshfeld Difference C17 --C18            | 0.18 Ang.      |
| PLAT234 ALERT 4 C | Large Hirshfeld Difference C3AA --C4AA          | 0.19 Ang.      |
| PLAT234 ALERT 4 C | Large Hirshfeld Difference C30 --C31            | 0.18 Ang.      |
| PLAT241 ALERT 2 C | High 'MainMol' Ueq as Compared to Neighbors of  | C16 Check      |
| PLAT241 ALERT 2 C | High 'MainMol' Ueq as Compared to Neighbors of  | C19 Check      |
| PLAT241 ALERT 2 C | High 'MainMol' Ueq as Compared to Neighbors of  | C20 Check      |
| PLAT241 ALERT 2 C | High 'MainMol' Ueq as Compared to Neighbors of  | C0AA Check     |
| PLAT241 ALERT 2 C | High 'MainMol' Ueq as Compared to Neighbors of  | C4AA Check     |
| PLAT242 ALERT 2 C | Low 'MainMol' Ueq as Compared to Neighbors of   | C14 Check      |
| PLAT242 ALERT 2 C | Low 'MainMol' Ueq as Compared to Neighbors of   | C15 Check      |
| PLAT242 ALERT 2 C | Low 'MainMol' Ueq as Compared to Neighbors of   | C17 Check      |
| PLAT242 ALERT 2 C | Low 'MainMol' Ueq as Compared to Neighbors of   | C18 Check      |
| PLAT242 ALERT 2 C | Low 'MainMol' Ueq as Compared to Neighbors of   | O5 Check       |
| PLAT242 ALERT 2 C | Low 'MainMol' Ueq as Compared to Neighbors of   | C1AA Check     |
| PLAT242 ALERT 2 C | Low 'MainMol' Ueq as Compared to Neighbors of   | C34 Check      |
| PLAT360 ALERT 2 C | Short C(sp3)-C(sp3) Bond C18 - C19              | 1.40 Ang.      |
| PLAT360 ALERT 2 C | Short C(sp3)-C(sp3) Bond C18 - C20              | 1.41 Ang.      |
| PLAT360 ALERT 2 C | Short C(sp3)-C(sp3) Bond C0AA - C4AA            | 1.34 Ang.      |
| PLAT362 ALERT 2 C | Short C(sp3)-C(sp2) Bond C3AA - C2AA            | 1.37 Ang.      |
| PLAT911 ALERT 3 C | Missing FCF Refl Between Thmin & STh/L=         | 0.595 3 Report |

---

**Alert level G**

|                   |                                                  |              |
|-------------------|--------------------------------------------------|--------------|
| PLAT002 ALERT 2 G | Number of Distance or Angle Restraints on AtSite | 7 Note       |
| PLAT003 ALERT 2 G | Number of Uiso or Uij Restrained non-H Atoms ... | 6 Report     |
| PLAT007 ALERT 5 G | Number of Unrefined Donor-H Atoms .....          | 2 Report     |
| PLAT032 ALERT 4 G | Std. Uncertainty on Flack Parameter Value High   | 0.700 Report |
| PLAT172 ALERT 4 G | The CIF-Embedded .res File Contains DFIX Records | 2 Report     |
| PLAT176 ALERT 4 G | The CIF-Embedded .res File Contains SADI Records | 2 Report     |
| PLAT187 ALERT 4 G | The CIF-Embedded .res File Contains RIGU Records | 1 Report     |
| PLAT720 ALERT 4 G | Number of Unusual/Non-Standard Labels .....      | 13 Note      |
| PLAT791 ALERT 4 G | Model has Chirality at C3AA (Chiral SPGR)        | R Verify     |
| PLAT791 ALERT 4 G | Model has Chirality at C0AA (Chiral SPGR)        | R Verify     |
| PLAT791 ALERT 4 G | Model has Chirality at C4AA (Chiral SPGR)        | R Verify     |
| PLAT791 ALERT 4 G | Model has Chirality at C6 (Chiral SPGR)          | R Verify     |
| PLAT791 ALERT 4 G | Model has Chirality at C15 (Chiral SPGR)         | R Verify     |
| PLAT791 ALERT 4 G | Model has Chirality at C18 (Chiral SPGR)         | R Verify     |
| PLAT791 ALERT 4 G | Model has Chirality at C19 (Chiral SPGR)         | R Verify     |

|         |           |                                                   |            |
|---------|-----------|---------------------------------------------------|------------|
| PLAT791 | ALERT 4 G | Model has Chirality at C26 (Chiral SPGR)          | R Verify   |
| PLAT860 | ALERT 3 G | Number of Least-Squares Restraints .....          | 47 Note    |
| PLAT870 | ALERT 4 G | ALERTS Related to Twinning Effects Suppressed ..  | ! Info     |
| PLAT910 | ALERT 3 G | Missing # of FCF Reflection(s) Below Theta (Min). | 1 Note     |
| PLAT916 | ALERT 2 G | Hoof t y and Flack x Parameter Values Differ by . | 0.15 Check |
| PLAT992 | ALERT 5 G | Repd & Actual _reflns_number_gt Values Differ by  | 1 Check    |

---

0 **ALERT level A** = Most likely a serious problem - resolve or explain  
8 **ALERT level B** = A potentially serious problem, consider carefully  
29 **ALERT level C** = Check. Ensure it is not caused by an omission or oversight  
21 **ALERT level G** = General information/check it is not something unexpected

1 ALERT type 1 CIF construction/syntax error, inconsistent or missing data  
29 ALERT type 2 Indicator that the structure model may be wrong or deficient  
7 ALERT type 3 Indicator that the structure quality may be low  
19 ALERT type 4 Improvement, methodology, query or suggestion  
2 ALERT type 5 Informative message, check

---

It is advisable to attempt to resolve as many as possible of the alerts in all categories. Often the minor alerts point to easily fixed oversights, errors and omissions in your CIF or refinement strategy, so attention to these fine details can be worthwhile. In order to resolve some of the more serious problems it may be necessary to carry out additional measurements or structure refinements. However, the purpose of your study may justify the reported deviations and the more serious of these should normally be commented upon in the discussion or experimental section of a paper or in the "special\_details" fields of the CIF. checkCIF was carefully designed to identify outliers and unusual parameters, but every test has its limitations and alerts that are not important in a particular case may appear. Conversely, the absence of alerts does not guarantee there are no aspects of the results needing attention. It is up to the individual to critically assess their own results and, if necessary, seek expert advice.

#### Publication of your CIF in IUCr journals

A basic structural check has been run on your CIF. These basic checks will be run on all CIFs submitted for publication in IUCr journals (*Acta Crystallographica*, *Journal of Applied Crystallography*, *Journal of Synchrotron Radiation*); however, if you intend to submit to *Acta Crystallographica Section C* or *E* or *IUCrData*, you should make sure that full publication checks are run on the final version of your CIF prior to submission.

#### Publication of your CIF in other journals

Please refer to the *Notes for Authors* of the relevant journal for any special instructions relating to CIF submission.

---

PLATON version of 07/08/2019; check.def file version of 30/07/2019

**Figure S27:** Single crystal structure of **7**.

Datablock ag\_ag\_515\_0m\_a - ellipsoid plot

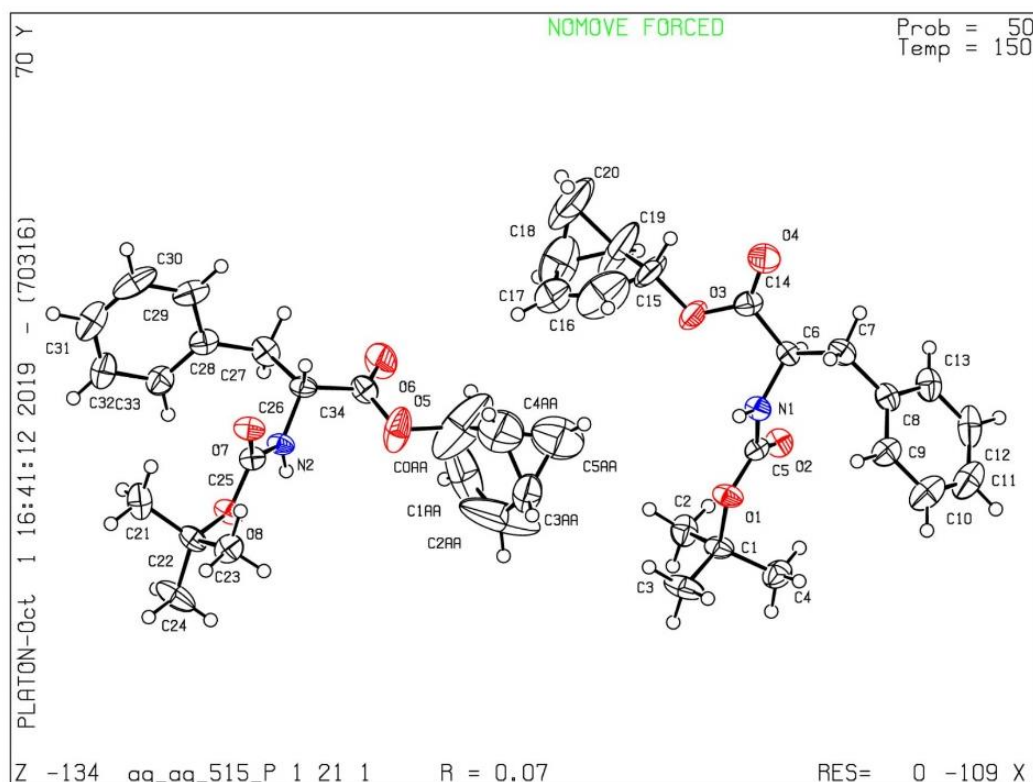

## 4. Reactivity of prepared bicyclic structures

### 4.1 Epimerization study (photoequilibration)

It has been found that the bicyclic products photoequilibrate during the irradiation at 254 nm. Despite the fact that they do not absorb the light, the photoequilibration occurs by sensitization by triplet benzene which has been described in the literature.<sup>6</sup> Kinetic experiments sampling the reaction mixture of TMS benzene rearrangement in MeOH catalysed by DCA (standard conditions) have revealed that there are different families of photoproducts (Figure S28). The initial photoproducts (a) rapidly interconvert into secondary photoproducts which either accumulate in the system (b, the most stable products) or are further interconverted into other

isomers (c). The change in product distribution has been also observed in the dark where some less-stable products epimerized and/or decomposed thermally. This has been described previously.<sup>4</sup>

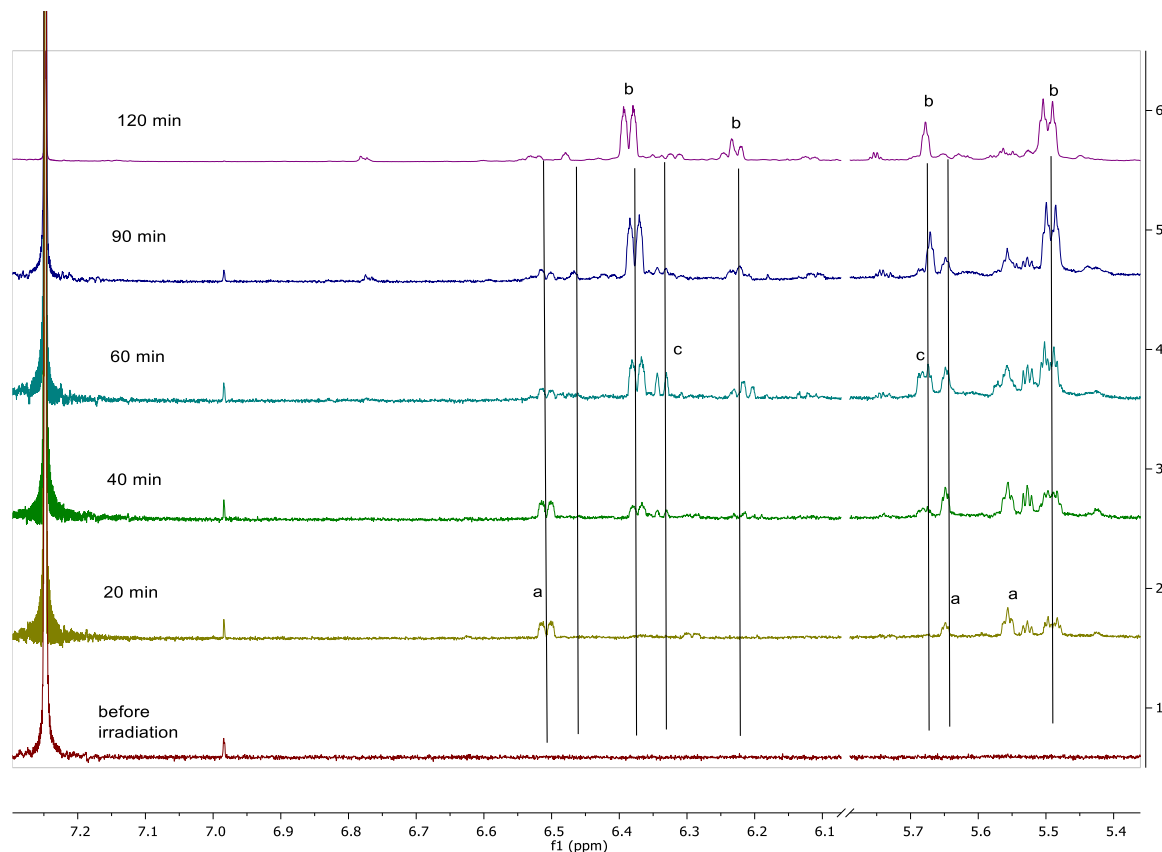

**Figure S28:** Photorearrangement of TMS-benzene catalysed by DCA monitored at short times (0 – 120 min) by <sup>1</sup>H NMR (zoom of the region with double bond protons) measured in CDCl<sub>3</sub>. The initial photoproducts are described as a, intermediate photoproducts as c and final photoproducts as b.

#### 4.2 Replacement of silyl group by TBAF

The stability of the rearranged adduct **1d** against desilylation has been tested by stirring a solution of **1d** (20 mg, 0.11 mmol, 1 eq.) in CDCl<sub>3</sub> (0.6 mL) with TBAF · 3H<sub>2</sub>O (100 mg, 0.32



mmol, 2.9 eq.). The solution was found completely stable for 3 days (Figure S29) and even after wash with water (1 mL) no changes have been observed.

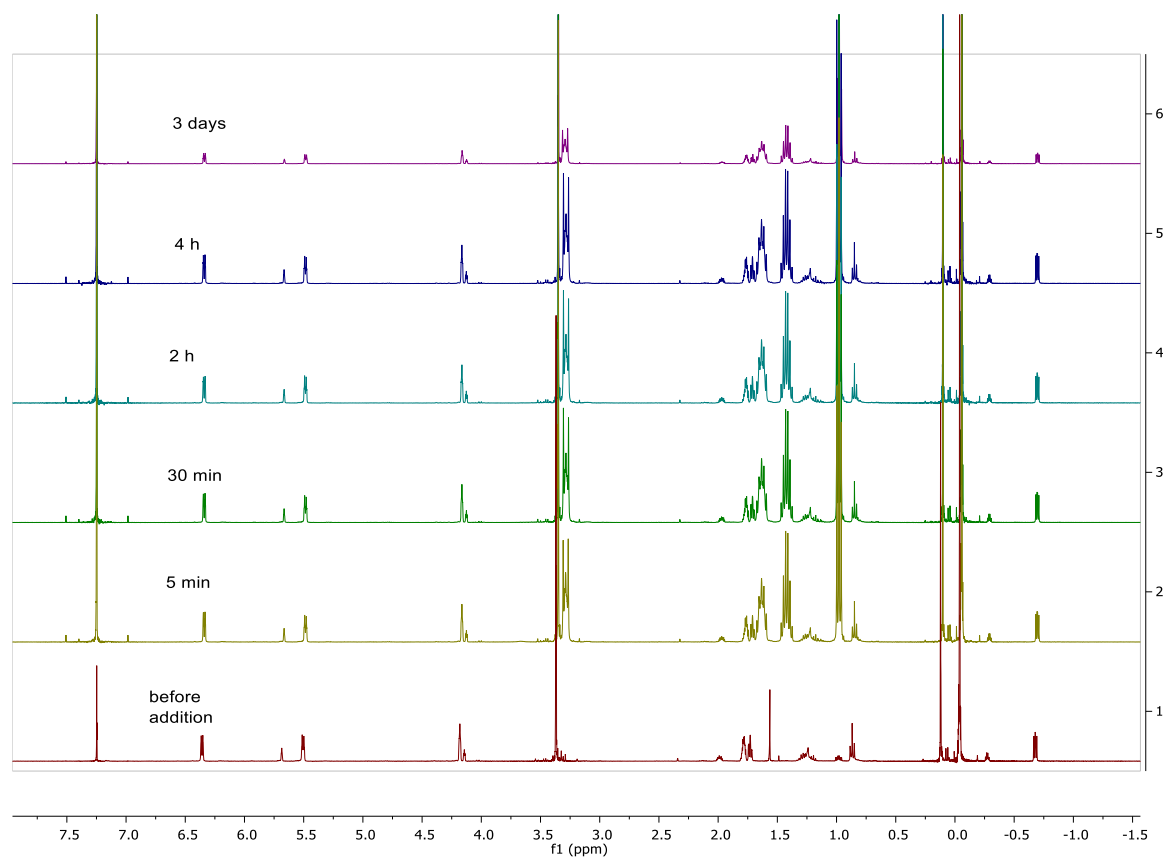

**Figure S29:** <sup>1</sup>H NMR spectra of **1d** in CDCl<sub>3</sub> in presence of TBAF. No changes were observed after 3 days of stirring at room temperature.

### 4.3 Demethylation

To test the reactivity of the product **1d**, we have demethylated it with BBr<sub>3</sub> (Scheme S3) by a following procedure:

To a solution of **1d** (337 mg, 1.85 mmol, 1.0 eq.) in anhydrous DCM (50 mL) boron tribromide (1 M solution in DCM, 3.69 mL, 3.69 mmol, 2.0 eq.) dropwise over 30 min at -78°C. The reaction was stirred for 15 min, quenched by pouring the reaction mixture on NH<sub>4</sub>Cl (sat., aq., 50 mL). The organic phase was washed with water (50 mL) and brine (50 mL) and dried over MgSO<sub>4</sub>. The solvent was carefully removed under reduced pressure to give crude (±)-(1*S*,2*S*,5*S*,6*R*)-6-(trimethylsilyl)bicyclo[3.1.0]hex-3-en-2-ol **1f**. The crude product was purified by column chromatography (pentane : Et<sub>2</sub>O = 2:1, v/v, R<sub>f</sub> = 0.4) to give 249 mg (80%) of the final product.

<sup>1</sup>H NMR (400 MHz, Chloroform-*d*) δ (ppm) 6.38 – 6.27 (m, 1H, *a*), 5.52 (dt, *J* = 5.4, 1.6 Hz, 1H, *b*), 4.46 (s, 1H, *c*), 1.79 (dq, *J* = 6.3, 2.8, 2.4 Hz, 1H, *d*), 1.76 – 1.66 (m, 1H, *e*), -0.03 (s, 4H, *f*), -0.64 (dd, *J* = 5.7, 4.2 Hz, 1H, *g*).

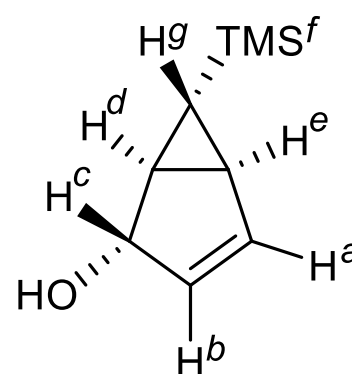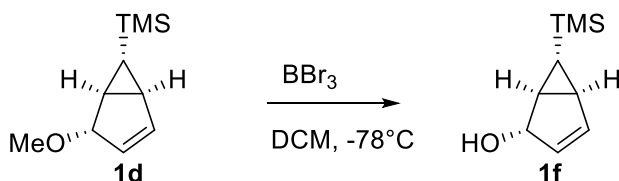

**Scheme S3:** Demethylation of **1d** by boron tribromide.

The bicyclic TMS-alcohol **1f** was identified by <sup>1</sup>H NMR (Figure S30, bottom).

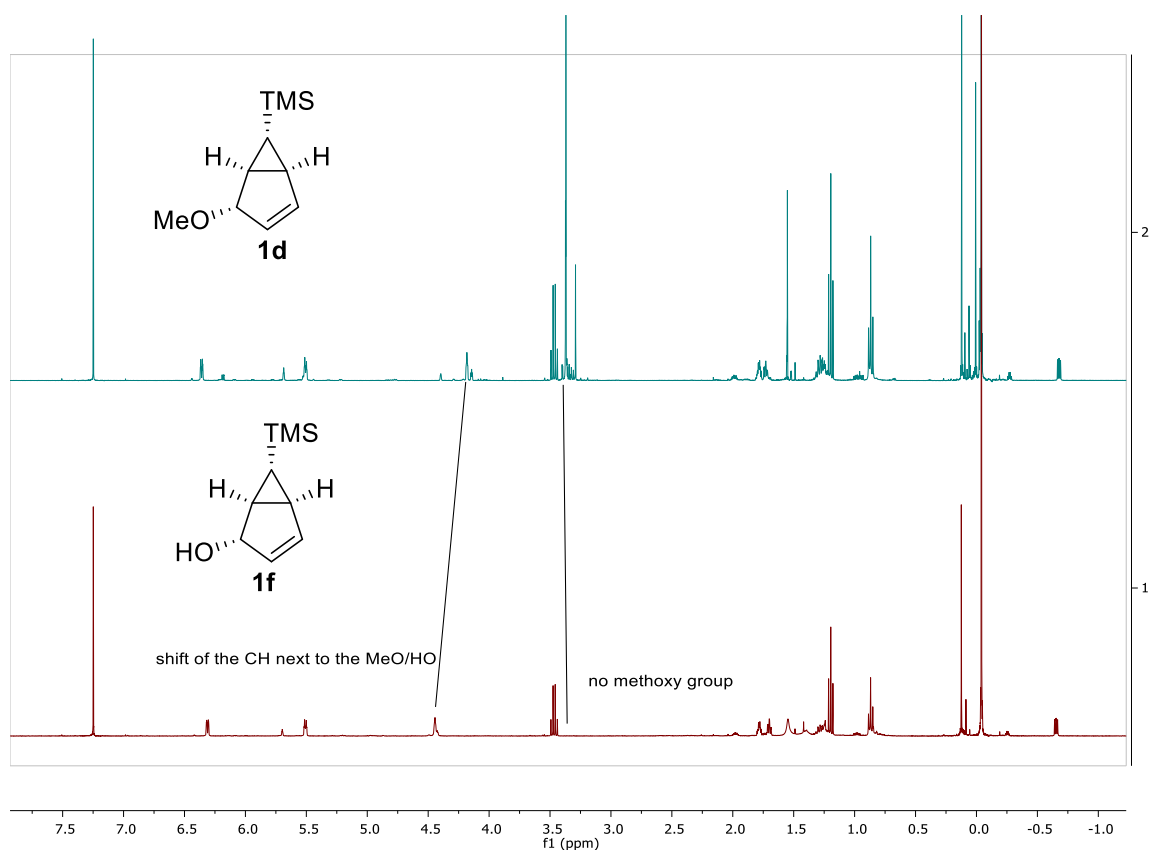

**Figure S30:**  $^1\text{H}$  NMR of **1d** in  $\text{CDCl}_3$  (top) and **1f** (bottom) with highlighted missing signal of the methoxy group and a shift of the adjacent proton.

#### 4.4 Enzymatic esterification

Further derivatization of the rearrangement products has been done by acetylation of the alcohol **1a** (Scheme S4) by the immobilized lipase B from *Candida antarctica* (Novozym 435). This lipase can efficiently transform alcohols to esters (and vice versa, depending on the conditions). The reaction was performed in isopropenyl acetate (irreversible acylation agent which produces acetone as a by-product). A full conversion of the product was observed after overnight reaction (Figure S31). However, kinetic resolution of enantiomers of **1a** by the enzyme was not successful, as we did not observe a difference in reactivity of different enantiomers.

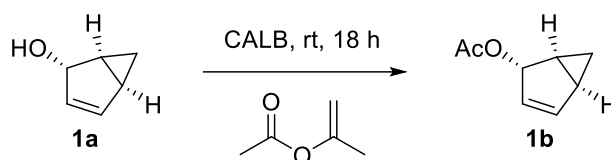

**Scheme S4:** Bioenzymatic esterification of the bicyclic alcohol **1a**.

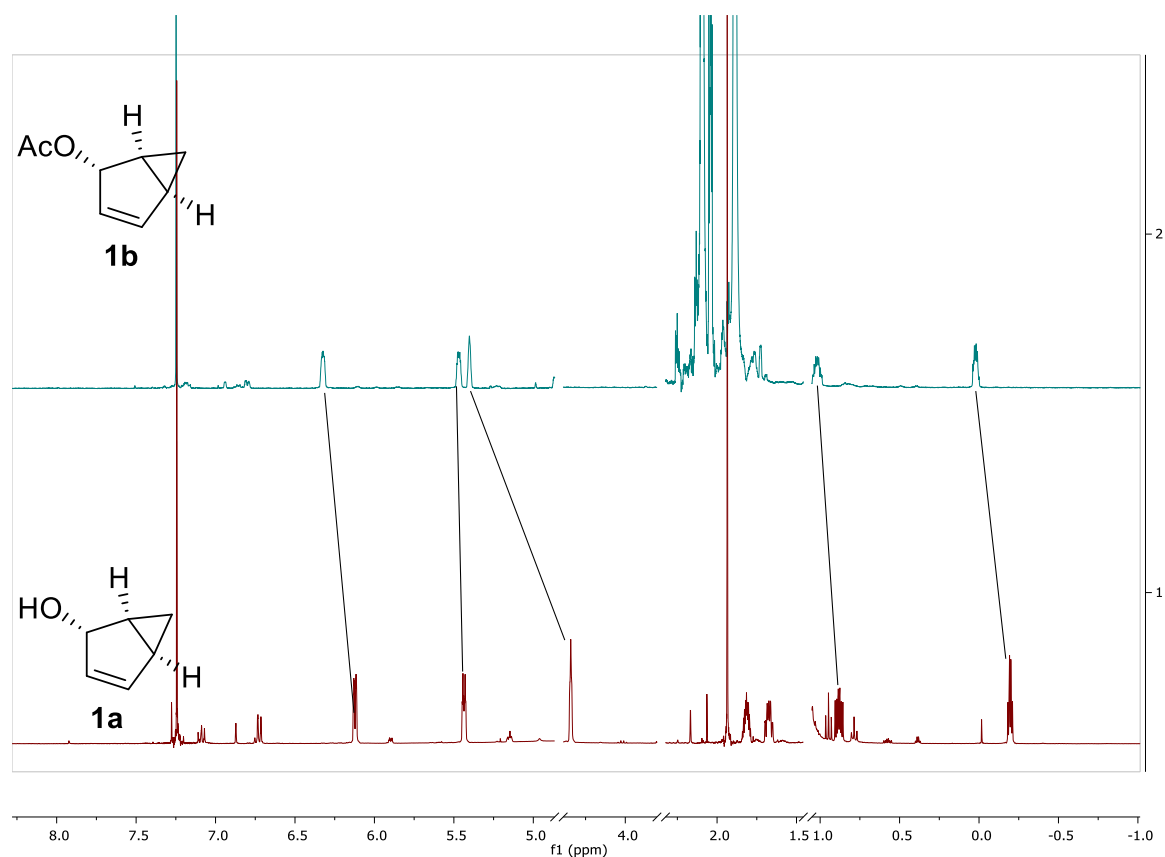

**Figure S31:**  $^1\text{H}$  NMR spectrum of **1a** (bottom) and the corresponding acetylated product **1b** (top).

## 5. Mechanistic experiments

### 5.1 Fluorescence quenching

Similarly to TMS benzene, no quenching of benzene by HCl was found. The fluorescence and the absorption spectra of benzene in MeOH in absence and presence of different concentrations of anhydrous HCl (in cyclopentyl methyl ether) is shown in Figure S13.

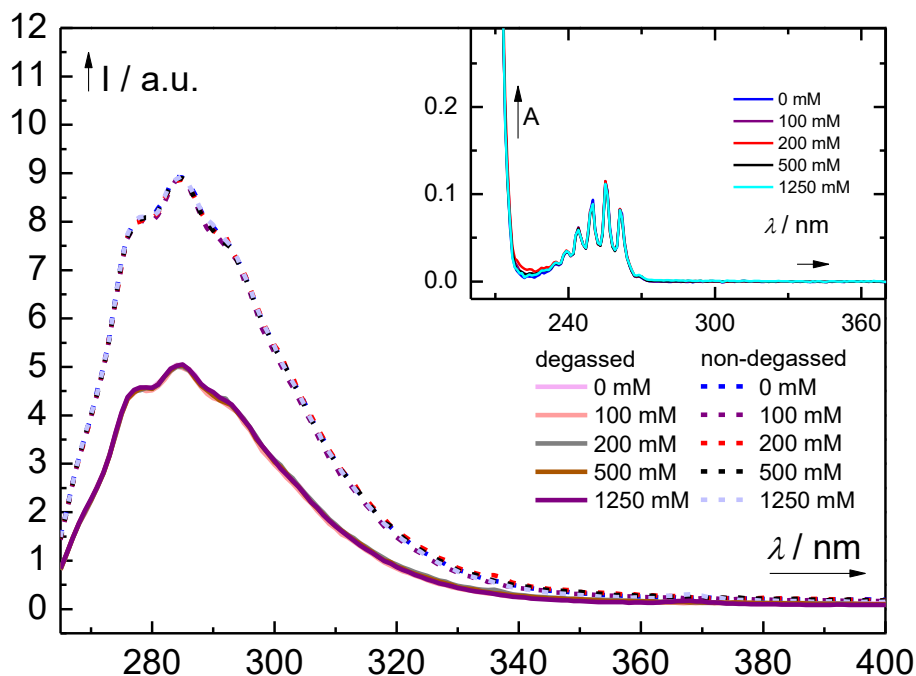

**Figure S32:** Fluorescence spectra of benzene ( $c = 1.0$  mM,  $\lambda_{\text{exc}} = 254$  nm) in anhydrous MeOH, degassed (solid line, purged with argon) and non-degassed (dashed line) in absence and presence of anhydrous HCl ( $c = 0 - 1250$  mM). The absorption spectra are shown in the inset.

Benzene fluorescence was further attempted by Lewis acid 9-borabicyclo[3.3.1]nonane (9-BBN). The solution of benzene ( $c = 1.0$  mM) in anhydrous THF was quenched with different concentrations of 9-BBN (Figure S33). The observed decrease in emission was analysed by Stern-Volmer analysis and dynamic quenching was found. In case of non-nucleophilic polar solvent, the benzene fluorescence can be efficiently quenched by this Lewis acids.

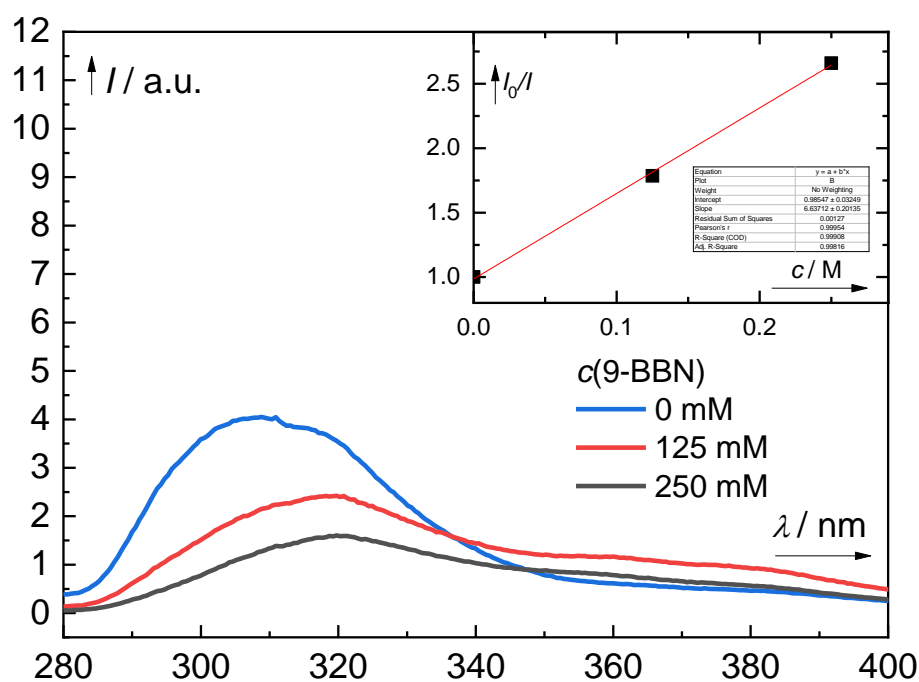

**Figure S33:** Fluorescence spectra of benzene ( $c = 1.0$  mM,  $\lambda_{\text{exc}} = 254$  nm) in anhydrous THF, in absence and presence of anhydrous 9-BBN ( $c = 0$ – $250$  mM). The Stern-Volmer plot is shown in the inset.

## 5.2 Stern Volmer analysis calculations

To estimate the quenching efficiency of HCl which is not an active quencher of benzene/TMS benzene fluorescence at concentrations up to 1.25 M, we calculated the hypothetical quenching constant if the fluorescence of benzene would be quenched from 20% at these extreme conditions. The quenching constant  $k_q$  was calculated from Equations S1 and S2:

$$\frac{I_0}{I_q} = \frac{100}{100-x} = 1 + \tau_s k_q [Q] \quad \text{Eq. S1}$$

$$k_q = \frac{\frac{100}{100-x} - 1}{\tau_s [Q]} = \frac{x}{(100-x)\tau_s [Q]} \quad \text{Eq. S2}$$

Where  $x$  is the hypothetical percentual quenching (20%) at the concentration of quencher [Q] (1.25M) and  $\tau_s$  is singlet lifetime of benzene (28 ns).

$$\text{This gives } k_q = \frac{x}{(100-x)\tau_s[Q]} = \frac{20}{(100-20) \times 28 \times 10^{-9} \times 1.25} = 7.14 \times 10^6 \text{ L mol}^{-1} \text{ s}^{-1}$$

We have estimated the diffusion constant in methanol at 298 K from the equation S3.

$$k_q^{diff} = \frac{8 \times 8.314 \times 298.15}{3 \times 0.000553} = 1.19 \times 10^7 \text{ m}^3 \text{ mol}^{-1} \text{ s}^{-1} = 1.19 \times 10^{10} \text{ L mol}^{-1} \text{ s}^{-1} \quad \text{Eq. S3}$$

This is four orders of magnitude higher than the hypothetical quenching constant. As we do not observe any quenching at this concentration, the real quenching constant must be even lower than  $7.14 \times 10^6 \text{ L mol}^{-1} \text{ s}^{-1}$ . It is therefore highly unlikely that the quenching would be for some reason slower than diffusion by at least four orders of magnitude. We can conclude that the singlet state is not influenced by the quencher (HCl).

### 5.3 Deuterium experiments

To test the incorporation of water into the benzene molecule we performed a parallel experiment of irradiation of benzene and perdeuterated benzene in water (Figure S34). The products of the reaction were analysed by proton and deuterium NMR spectroscopy (Figure S35).

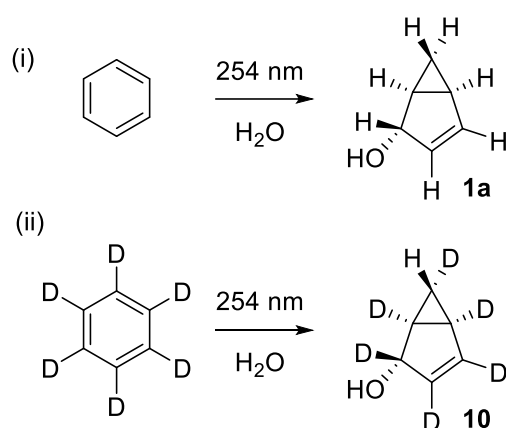

**Figure S34:** Photochemical rearrangement of benzene and perdeuterated benzene in water and their products.

The rearrangement of benzene resulted in the product **1a** (Figure S35, top) with characteristic set of multiplets corresponding to the diastereotopic protons of the bicyclic scaffold (vide supra). The irradiation of perdeuterated benzene in water lead to the product **10** that contains protium exclusively incorporated in the *endo* position of the cyclopropane CH<sub>2</sub> (signal at -0.13 ppm). This signal is not present in the deuterium spectrum (Figure S35, middle) and is the only present in the <sup>1</sup>H spectrum (Figure S35, bottom). *Note:* deuterium spectrum has only broad singlet signals instead of multiplets. This is caused by much smaller coupling constants <sup>2</sup>H-<sup>2</sup>H in comparison to <sup>1</sup>H-<sup>1</sup>H.

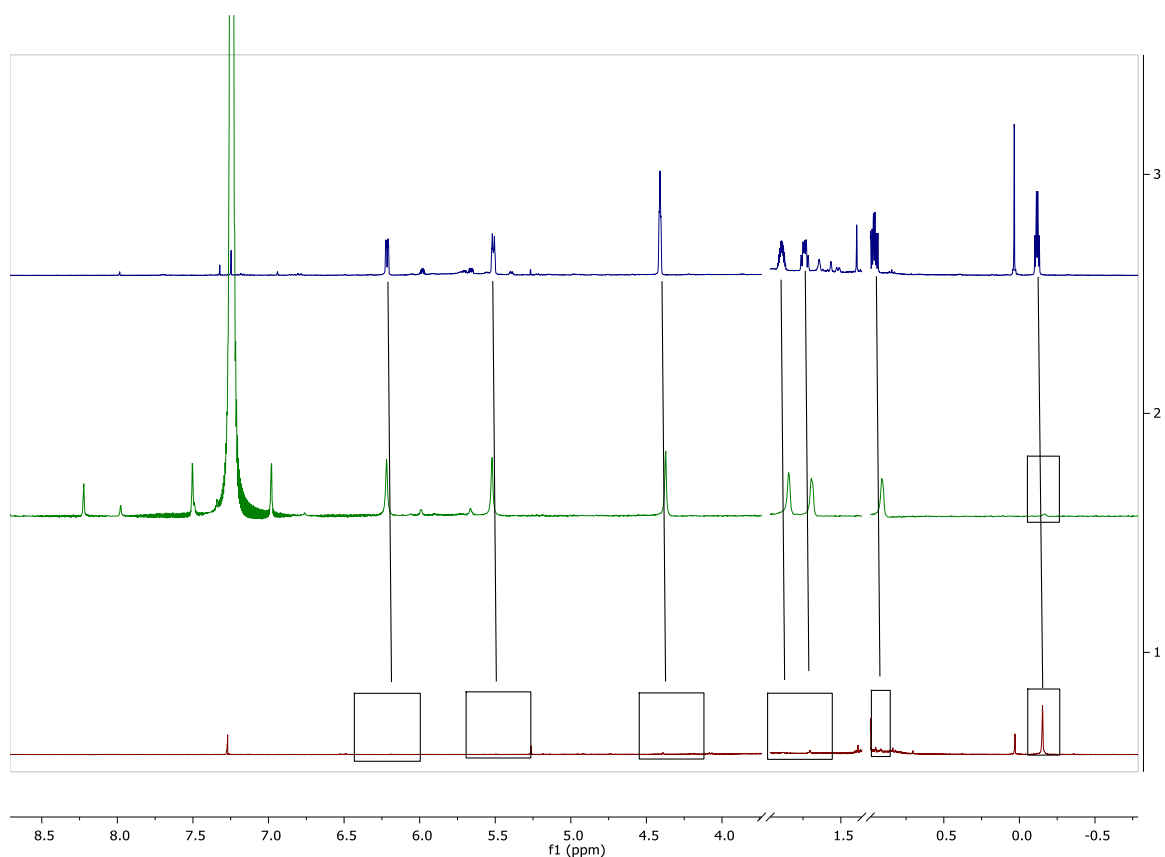

**Figure S35:** NMR spectra of the photorearrangement product of benzene (top, <sup>1</sup>H NMR) and per-deuterated benzene (middle: <sup>2</sup>H NMR; bottom: <sup>1</sup>H NMR). Rectangles emphasize the missing signals. Note: signal at ~0 ppm corresponds to the tetramethylsilane added as internal standard in CDCl<sub>3</sub>.



#### 5.4 Approximation of the concentration of excited molecules in a typical irradiation experiment

We have estimated the concentration of the excited molecules in a typical experiment in Rayonet reactor from the known photon flux of the Rayonet reactor ( $\sim 1.65 \times 10^{16}$  photons  $\text{s}^{-1} \text{cm}^{-3}$ ) and from the known singlet state lifetime of benzene in polar solvents (28 ns).<sup>7</sup> Assuming that all incident light is being absorbed, the concentration of the excited states equals to  $c(\text{excited state}) = I\tau$ , where  $I$  is the photon flux of the light source ( $\sim 1.65 \times 10^{16}$  photons  $\text{s}^{-1} \text{cm}^{-3}$ ) and  $\tau$  is the lifetime of the excited state (28 ns). This corresponds to the upper limit of the excited molecules to be  $4.62 \times 10^8$  molecules/mL or  $\sim 8 \times 10^{-13}$  M.

#### 5.5 Estimation of the concentration of benzvalene at photostationary state

Based on published results,<sup>8</sup> we have estimated the concentration of benzvalene in photostationary state. Wilzbach and co-workers have reported that a irradiation of a solution of 0.2 mL of benzene in cyclohexane in 25 mL leads to maximum 1% yield. This corresponds to 120 mM concentration of benzene (close to our experimental conditions with 70 mM) and the maximum achievable concentration of benzvalene at photostationary state irradiated at 254 nm in cyclohexane is  **$\sim 1.2$  mM**.

### **6. Pyridinium, pyrylium ion and silabenzene photochemical rearrangement**

The photochemical rearrangement of pyridinium salts is analogous to simple arenes. It was first reported by Kaplan, Pavlik and Wilzbach in 1970s that irradiation of *N*-methylpyridinium chloride in basic aqueous solution leads to production of bicyclic aziridine derivative (Scheme S5).<sup>9</sup> Mariano and co-workers have observed an acid-promoted ring opening of photorearranged *N*-allylpyridinium

perchlorate in 1980s.<sup>10</sup> The synthetic potential of the photoinduced rearrangement of pyridinium ions has been first identified in the mid-1990s when Mariano has demonstrated the generality of the process irradiating differently substituted pyridinium ions. The products of this reaction undergo stereocontrolled, acid-promoted ring opening with variety of nucleophiles.<sup>11</sup>

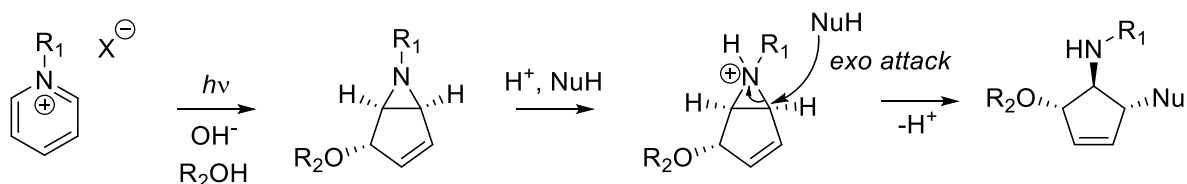

**Scheme S5:** Photochemistry and acid-promoted ring opening of the bicyclic product.

Number of other studies on this systems followed: synthesis of aminocyclopentitols,<sup>12,13</sup> (-)-allosamizoline aminocyclopentitol,<sup>14</sup> trehatolin aminocyclitol,<sup>15</sup> preparation of cyclopentenone ketals,<sup>16</sup> stereocontrolled synthesis of (+)-mannostatin A<sup>9,17</sup> and its analogues,<sup>18</sup> polyhydroxylated indolizidines,<sup>19</sup> synthesis of amino-sugars,<sup>20</sup> (+)-lactacystin,<sup>21</sup> highly substituted cyclopentanes,<sup>22</sup> (-)-cephalotaxine from 1,2-cyclopenta-fused pyridinium perchlorate<sup>23</sup> and synthetic utilization of other fused derivatives<sup>24</sup> scale-up of photochemical reactions in flow reactors<sup>25,26</sup> and other synthetic applications.<sup>27,28</sup> The pyridinium photochemistry, its mechanism and synthetic applications have been reviewed several times.<sup>29,30,31,32,33,34</sup>

Pyrylium salt photochemistry<sup>32,35</sup> and silabenzene photochemistry<sup>36,37</sup> are analogous to the pyridinium derivatives (Scheme S6). In the case of pyrylium, the oxygen atom is incorporated in the three-membered ring, silabenzene rearranges with bulky silicon atom as a part of the five-membered ring. However, their synthetic utility is much lower than in the case of pyridiniums.

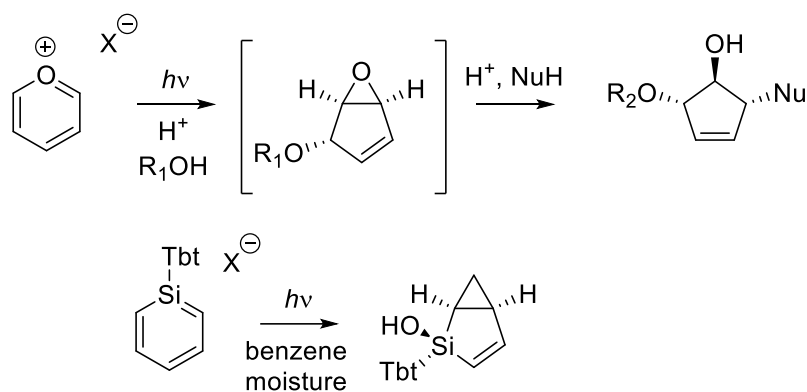

Tbt = 2-{2,4,6-tris[bis(trimethylsilyl)methyl]phenyl}

**Scheme S6:** Photochemistry of pyrylium salts and silabenzene.

## 7. Computational part

### 7.1 Computational details: DFT calculations

All DFT calculations were performed with the Gaussian 16 Revision B.01 program suite.<sup>5</sup> The geometries in the  $S_0$ ,  $T_1$ , and  $S_1$  states were optimized using, respectively, restricted B3LYP, unrestricted B3LYP (UB3LYP) and time-dependent (TD)-B3LYP with the 6-311+G(d,p) valence triple-zeta basis set of Pople and co-workers.<sup>38,39</sup> In calculations of the addition of MeOH and  $\text{MeOH}_2^+$  to benzvalene in the  $S_0$  state, implicit solvation was taken into account using the SMD model<sup>40</sup> simulating methanol as solvent. Dispersion corrections were added using Grimme's D3 model in calculations of activation energies for the proton transfer in the methanol cluster  $(\text{MeOH})_8\text{H}^+$  corresponding to a saturated cluster (see ref <sup>41</sup>).<sup>42</sup> All stationary points were verified by frequency calculations.

Proton affinities in the gas phase were computed at the same level as the geometry optimization. By definition, proton affinity (PA) is the negative of the reaction enthalpy for the gas phase addition of a proton to the chemical species in question.<sup>43</sup> It is calculated at 298.15 K according to the following Equation S4:

$$\text{PA} = -[H(\text{MH}^+) - (H(\text{M}) + H(\text{H}^+))] \quad \text{Eq. S4}$$

## 7.2 Computational details: Calculations using multiconfigurational methods:

Geometry optimizations and energy calculations using multiconfigurational methods were performed using the OpenMolcas version 18.09 program (tag 50-g6d6e5e5).<sup>44</sup> In these calculations, all the optimized geometries were obtained through usage of state-average complete active space self-consistent field (SA-CASSCF)<sup>45</sup> using the ANO-RCC type basis set.<sup>46</sup> The dynamic electron correlation was included by single-point calculations using multi-state complete active space second-order perturbation (MS-CASPT2)<sup>47</sup> level at the optimized CASSCF geometries. Default IPEA<sup>48</sup> shift (0.25 a.u.) and imaginary shift<sup>49</sup> of 0.1 a.u. were applied to deal with intruder states at MS-CASPT2 level.

For benzene in the  $S_0$  and  $T_1$  states and for the  $S_1$  state potential energy surface (PES) the ANO-RCC-VTZP basis set and an active space of six electrons and six orbitals including all the  $\pi$  orbitals were used. State average including three states (SA3-CASSCF) was used for optimizations of the  $S_0$  and  $T_1$  states. Due to the switch in the order of  $B_{1u}$  and  $E_g$  symmetric excited states at the  $S_1$   $D_{6h}$  minimum ( $1^1B_{2u}$ ), four states were included in the average (SA4-CASSCF) for computation of the  $S_1$  PES.<sup>50</sup> In the  $S_1$  PES we computed the minimum energy path (MEP) from the vertically excited  $S_1$  state, the transition state (TS) structure, the intrinsic reaction coordinate (IRC) path, and the  $S_1/S_0$  conical intersection (CI). Frequency calculations were performed for all the stationary points to confirm that they were minima or saddle-points. For the IRC calculations steps of 0.1 a.u. and 0.025 a.u. were used in the reverse (towards the  $D_{6h}$  minimum) and forward (towards the CI) directions, respectively, since the TS structure is located near the CI. The same level of theory (MS3-CASPT2/ANO-RCC-VTZP//SA3-CASSCF/ANO-RCC-VTZP) was used to compute the  $C_{2v}$  symmetric  $S_0$ ,  $S_1$ , and  $T_1$  states of the benzenium cation. For those molecules, the active space was composed of four electrons in five  $\pi$  orbitals. Three states were included in the SA-CASSCF and MS-CASPT2 calculations.

The optimized geometries of the  $S_0$  and  $S_1$  states ( $S_1$  minimum, TS, and conical intersections) for the pyridinium ion and silabenzene were obtained at SA3-CASSCF(6,6)/ANO-RCC-VTZP level and the dynamic electron correlation was included by single point calculations using MS3-CASPT2(6,6)/ANO-RCC-VTZP. For silabenzene, the reaction path was computed following the intrinsic reaction coordinate at CASSCF level, from the TS to the  $S_1$  minimum, using 0.1 a.u. as step size. For the pyridinium ion it was not possible to find a TS leading from the  $S_1$  minimum to the  $S_1/S_0$  conical intersection because at CASSCF level the barrier towards the CI is too shallow or inexistent. Instead, linear interpolations in

internal coordinates were used to build the PES in the  $S_1$  state. The IPEA and imaginary shifts were the same as described for benzene. For cyclooctatetraene (COT) and protonated COT (CO $TH^+$ ) the geometries of the  $S_0$ ,  $S_1$ , and  $T_1$  states were optimized at the same level described for the molecules above (MS3-CASPT2/ANO-RCC-VTZP//SA3-CASSCF/ANO-RCC-VTZP). The active space was composed by the  $\pi$  system, *i.e.*, 8 electrons in 8 orbitals for COT and 6 electrons in 7 orbitals for CO $TH^+$ .

Due to increase of the number of atoms, geometry optimizations and energy calculations for the substituted benzenes (TMS-benzene and *t*Bu-benzene) were performed using the ANO-RCC-VDZP basis set. Frequency calculations were done at the same level. For each one of the molecules, four different prefulvenic transition state structures in the  $S_1$  state were computed, having the substituent group at either the *ipso*, *ortho*, *meta*, or *para* position relative to the puckered carbon atom of the ring. To be able to compare the energy barriers, stationary points of benzene in the different states were also computed using the ANO-RCC-VDZP basis set.

The potential energy surface for the protonation of benzene in the  $S_1$  state by MeOH $_2^+$  was calculated using SA4-CASSCF(8,8)/ANO-RCC-VTZP optimizations followed by single-point energy calculations at MS4-CASPT2(8,8)/ANO-RCC-VTZP level. The active space includes the six benzene  $\pi$  and  $\pi^*$  orbitals and one pair of  $\sigma$  and  $\sigma^*$  orbitals corresponding to the O–H bond which will be broken. The starting geometry corresponds to an equilibrium geometry for the complex where the (O)H---C nonbonded distance is 2.561 Å. From this geometry, constrained optimizations were done reducing the OH–C distance in steps of 0.1 Å. The optimized complex between benzene and non-protonated methanol in the  $S_1$  state was calculated at the same level of theory and used as a starting point for the calculation with protonated methanol. This optimization was done without geometric constraints and including eight electrons in eight orbitals, as described above.

### 7.3 Computational details: Aromaticity indices (NMR chemical shifts and electronic indices)

NMR chemical shifts ( $^1H$  and nucleus independent chemical shifts (NICS)) were obtained in the  $S_0$  and  $T_1$  states through calculations using the GIAO method<sup>51</sup> in Gaussian 16 Revision B.01 at B3LYP/6-311+G(d,p) level and in the  $S_1$  state through the GIAO method using Dalton 16.02<sup>52</sup> at CASSCF/6-31++G(d,p) level. Restricted calculations were used for the  $S_0$  state and unrestricted for the  $T_1$  state. In order to take into account the multiconfigurational character of the  $S_1$  states, NICS values were obtained using Dalton 16.02<sup>52</sup> at CASSCF/6-31++G(d,p) level.

NICS(1)<sub>zz</sub> values in the S<sub>0</sub> and T<sub>1</sub> states were also computed at the latter level of theory in a few cases. (U)DFT geometries were used for GIAO calculations at (U)DFT and at CASSCF levels, and SA-CASSCF geometries were used to obtain NICS(1)<sub>zz</sub> values at the CASSCF level. In all cases, the active spaces were kept as described for the molecules in the previous section.

The NICS values are the negative of the magnetic shieldings at specific positions, originally at the center of the rings. When probe atoms are inserted 1.0 Å above or below the molecular plane, along the z-axis of the coordinate system, the NICS values obtained at these points are called NICS(1)<sub>zz</sub>. NICS(1)<sub>zz</sub> values were computed along the S<sub>1</sub> state PES of benzene, pyridinium ion, and silabenzene. NICS(1)<sub>zz</sub> were also computed for benzene, benzenium cation, COT, and COTh<sup>+</sup> in their S<sub>0</sub>, S<sub>1</sub>, and T<sub>1</sub> states, and for TMS-benzene and *t*-Bu-benzene in their S<sub>1</sub> vertical and S<sub>1</sub> minimum states.

For the prefulvenic structures of benzene, the position of the probe atom was chosen as the central position between the C1, C2, C4, and C5 atoms and the xy-plane was defined by these four atoms whereby the NICS(1)<sub>zz</sub> values were computed above and below that plane. For silabenzene and pyridinium ion the place of the probe atom was also chosen based on the plane comprising the corresponding four carbon atom. The NICS(1)<sub>zz</sub> values along the S<sub>1</sub> puckering coordinate from the S<sub>1</sub> minimum towards the CI (see Figure 1 in the manuscript and Figure S) were computed for each of the geometries along the PES. For the structures at (near) conical intersection it is not possible to compute NICS values due to the degeneracy of the states.

Finally, to help in the interpretation of the NMR data obtained experimentally, NMR chemical shift calculations of possible bicyclo[3.1.0]hexenyl photoproducts (**1a** - **f**) were performed with the GIAO method at B3LYP/6-311+G(2d,p) level.

Additionally, we also computed electronic aromaticity indices for benzene, benzenium cation, COT, and COTh<sup>+</sup> in the S<sub>0</sub> and S<sub>1</sub> states. The multicenter index (MCI)<sup>53</sup> and aromatic fluctuation index (FLU)<sup>54</sup> were obtained from SA-CASSCF/ANO-RCC-VTZP wavefunctions using the B3LYP/6-311+G(d,p) geometry. MCI quantifies the extent of cyclic delocalized conjugation while FLU describes the fluctuation of electronic charge between adjacent atoms in a given ring. Higher MCI values and smaller FLU values (typically close to zero) indicate increased aromaticity. These indices were computed using the AIMAll<sup>55</sup> and ESI<sup>56</sup> programs. For more details about these indices please check the references cited above.

## 7.4 Geometries, Cartesian coordinates, and energies

**Table S13.** Electronic energies (in a.u.), configurations, and configuration weights of benzene in the  $S_0$  and along of puckering coordinate at SA-CASSCF(6,6)/ANO-RCC-VTZP level. Absolute energies at MS-CASPT2(6,6)/ANO-RCC-VTZP level. Three and four states were included in the average for the optimizations of the  $S_0$  and  $S_1$  species ( $S_1$  minimum, TS, and CI). The optimized state is shown in italics while the remaining states are single point calculations at the respective optimized geometry.

| Optimized Geometry | State                   | SA-CASSCF          | MS-CASPT2          | Conf          | weight      | Conf          | weight      |
|--------------------|-------------------------|--------------------|--------------------|---------------|-------------|---------------|-------------|
| $S_0$              | <i><math>S_0</math></i> | <i>-230.946618</i> | <i>-231.832480</i> | <i>222000</i> | <i>0.89</i> |               |             |
|                    | $S_1$                   | -230.765931        | -231.645541        | 2u2d00        | 0.40        | u2200d        | 0.40        |
| $S_1$              | $S_0$                   | -230.939701        | -231.825559        | 222000        | 0.87        |               |             |
|                    | <i><math>S_1</math></i> | <i>-230.774286</i> | <i>-231.652490</i> | <i>2u200d</i> | <i>0.38</i> | <i>u22d00</i> | <i>0.38</i> |
| TS                 | $S_0$                   | -230.788360        | -231.691329        | 222000        | 0.72        |               |             |
|                    | <i><math>S_1</math></i> | <i>-230.742454</i> | <i>-231.637536</i> | <i>22ud00</i> | <i>0.74</i> |               |             |
| CI                 | $S_0$                   | -230.744013        | -231.655302        | u2200d        | 0.76        |               |             |
|                    | $S_1$                   | -230.744012        | -231.640988        | 222000        | 0.69        |               |             |

**Table S14.** Cartesian coordinates of benzene in the  $S_0$  state and along of puckering coordinate in the  $S_1$  state ( $S_1$  minimum, prefulvene TS and  $S_1/S_0$  conical intersection) at SA-CASSCF(6,6)/ANO-RCC-VTZP level. Absolute energies at MS4-CASPT2(6,6)/ANO-RCC-VTZP level. Three and four states were included in the optimizations of the  $S_0$  state and  $S_1$  structures.

| Benzene in the $S_0$ state      |             |             |             | Benzene in the $S_1$ state     |             |             |             |
|---------------------------------|-------------|-------------|-------------|--------------------------------|-------------|-------------|-------------|
| E : -231.83248030 a.u.          |             |             |             | E : -231.65249029 a.u.         |             |             |             |
| C                               | -0.69626440 | -1.20596594 | -0.00021885 | C                              | -0.71521166 | -1.23878523 | -0.00002688 |
| C                               | 0.69626601  | -1.20596434 | 0.00022742  | C                              | 0.71521158  | -1.23878515 | 0.00002359  |
| C                               | 1.39253068  | 0.00000376  | -0.00000344 | C                              | 1.43042486  | 0.00000004  | 0.00000327  |
| C                               | 0.69626437  | 1.20596555  | -0.00022911 | C                              | 0.71521159  | 1.23878510  | -0.00002686 |
| C                               | -0.69626586 | 1.20596532  | 0.00023768  | C                              | -0.71521155 | 1.23878509  | 0.00002360  |
| C                               | -1.39252982 | -0.00000272 | -0.00001370 | C                              | -1.43042483 | 0.00000006  | 0.00000326  |
| H                               | -1.23271763 | -2.13512115 | -0.00073796 | H                              | -1.25056433 | -2.16603578 | -0.00010249 |
| H                               | 1.23271198  | -2.13512387 | 0.00076700  | H                              | 1.25056438  | -2.16603576 | 0.00009016  |
| H                               | 2.46542942  | 0.00000224  | -0.00000804 | H                              | 2.50112523  | -0.00000002 | 0.00001234  |
| H                               | 1.23271838  | 2.13512072  | -0.00077995 | H                              | 1.25056404  | 2.16603583  | -0.00010250 |
| H                               | -1.23271451 | 2.13512352  | 0.00080899  | H                              | -1.25056411 | 2.16603583  | 0.00009015  |
| H                               | -2.46542863 | -0.00000307 | -0.00005003 | H                              | -2.50112520 | 0.00000003  | 0.00001235  |
| Pefulvene TS in the $S_1$ state |             |             |             | $S_1/S_0$ conical intersection |             |             |             |
| E : -231.63753599 a.u.          |             |             |             | E : -231.64098849 a.u.         |             |             |             |
| C                               | -0.75113820 | -1.03504388 | -0.02959979 | C                              | -0.74693586 | -0.96731268 | -0.06797895 |
| C                               | 0.69802420  | -1.16727634 | -0.02324307 | C                              | 0.70199906  | -1.15841480 | -0.02507421 |
| C                               | 1.44913370  | 0.00057440  | 0.08887811  | C                              | 1.46167420  | 0.00057453  | 0.08683577  |
| C                               | 0.69737474  | 1.16801573  | -0.02318332 | C                              | 0.70134090  | 1.15914677  | -0.02502981 |
| C                               | -0.75171068 | 1.03496600  | -0.02958438 | C                              | -0.74750214 | 0.96725396  | -0.06789220 |
| C                               | -1.39929186 | -0.00022324 | 0.75780701  | C                              | -1.39019823 | -0.00024181 | 0.80159738  |

|   |             |             |             |   |             |             |             |
|---|-------------|-------------|-------------|---|-------------|-------------|-------------|
| H | -1.33625813 | -1.69441821 | -0.64421693 | H | -1.34540764 | -1.60607093 | -0.69158605 |
| H | 1.14633676  | -2.13304315 | -0.14984932 | H | 1.12527551  | -2.13732177 | -0.12916580 |
| H | 2.51699374  | 0.00086847  | 0.16843638  | H | 2.52780219  | 0.00087696  | 0.18942845  |
| H | 1.14515163  | 2.13403720  | -0.14974395 | H | 1.12406294  | 2.13829750  | -0.12909337 |
| H | -1.33719827 | 1.69405137  | -0.64416017 | H | -1.34631907 | 1.60576122  | -0.69142322 |
| H | -2.46970064 | -0.00051837 | 0.83731570  | H | -2.45807487 | -0.00055898 | 0.90823828  |

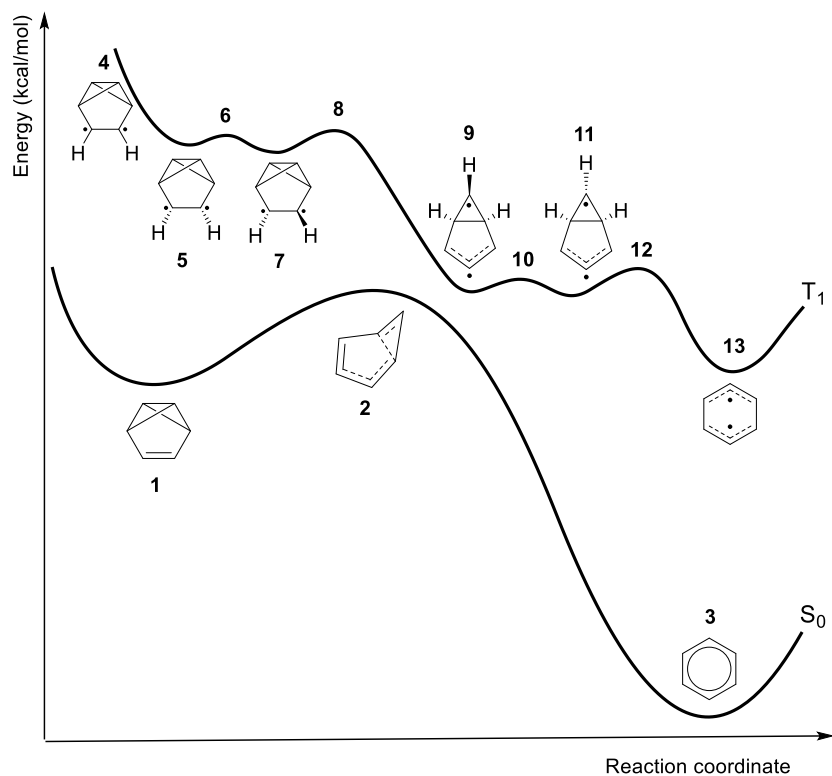

**Figure S36:** Compound numbering of minima and transition state structures on the  $T_1$  and  $S_0$  potential energy curves for the **rearrangement of  $T_1$  state benzvalene to  $T_1$  state benzene**. Structure **4** is the benzvalene vertically excited from its  $S_0$  state structure to the  $T_1$  state. It is worth to be noted that the rearrangement of  $T_1$  state benzvalene to  $T_1$  state benzene is highly exothermic ( $\sim 60$  kcal/mol). Moreover, the rearrangement in the  $S_0$  state has a computed activation barrier of  $\sim 24$  kcal/mol, resembling both previous experimental findings ( $26.7$  kcal/mol)<sup>57</sup> and earlier computed results.<sup>58,59</sup>



**Table S15.** Electronic energies (without ZPE corrections) and cartesian coordinates for the structures shown in Figure S36 (rearrangement of T<sub>1</sub> state benzvalene to T<sub>1</sub> state benzene) calculated at B3LYP/6-311+G(d,p) level in the gas phase.

|                                                                                                                                                                                                                                                                                                                                                                                                                                                                                                                                                                                                                                                                                                                                                                                                                                                                                                                                                                                                                                                                                                                                                                    |              |              |              |              |   |              |              |              |   |             |              |              |                                                                                                                                                                                                                                                                                                                        |             |              |              |             |              |              |              |             |              |              |              |   |              |              |              |   |              |              |              |   |             |              |              |   |             |              |              |   |              |              |             |   |              |              |              |                                                                                                                                                                                                                                                                                                                                                                                                                                                                                                                                                                                                                                                                                                                                                                                                                                                                                                                                                                                                                                                                                                                                                                                                                                      |   |             |              |              |   |              |             |              |   |              |             |              |   |              |              |              |   |             |              |             |   |              |              |              |   |             |              |              |   |              |             |              |   |              |             |              |   |              |              |              |   |              |              |             |   |              |              |              |
|--------------------------------------------------------------------------------------------------------------------------------------------------------------------------------------------------------------------------------------------------------------------------------------------------------------------------------------------------------------------------------------------------------------------------------------------------------------------------------------------------------------------------------------------------------------------------------------------------------------------------------------------------------------------------------------------------------------------------------------------------------------------------------------------------------------------------------------------------------------------------------------------------------------------------------------------------------------------------------------------------------------------------------------------------------------------------------------------------------------------------------------------------------------------|--------------|--------------|--------------|--------------|---|--------------|--------------|--------------|---|-------------|--------------|--------------|------------------------------------------------------------------------------------------------------------------------------------------------------------------------------------------------------------------------------------------------------------------------------------------------------------------------|-------------|--------------|--------------|-------------|--------------|--------------|--------------|-------------|--------------|--------------|--------------|---|--------------|--------------|--------------|---|--------------|--------------|--------------|---|-------------|--------------|--------------|---|-------------|--------------|--------------|---|--------------|--------------|-------------|---|--------------|--------------|--------------|--------------------------------------------------------------------------------------------------------------------------------------------------------------------------------------------------------------------------------------------------------------------------------------------------------------------------------------------------------------------------------------------------------------------------------------------------------------------------------------------------------------------------------------------------------------------------------------------------------------------------------------------------------------------------------------------------------------------------------------------------------------------------------------------------------------------------------------------------------------------------------------------------------------------------------------------------------------------------------------------------------------------------------------------------------------------------------------------------------------------------------------------------------------------------------------------------------------------------------------|---|-------------|--------------|--------------|---|--------------|-------------|--------------|---|--------------|-------------|--------------|---|--------------|--------------|--------------|---|-------------|--------------|-------------|---|--------------|--------------|--------------|---|-------------|--------------|--------------|---|--------------|-------------|--------------|---|--------------|-------------|--------------|---|--------------|--------------|--------------|---|--------------|--------------|-------------|---|--------------|--------------|--------------|
| <p><b>1 (Benzvalene (C<sub>2v</sub>) in the S<sub>0</sub> state)</b></p> <p>E : -232.180434003 a.u.</p> <table border="1"> <tbody> <tr><td>C</td><td>0.723750000</td><td>0.000000000</td><td>-1.011675000</td></tr> <tr><td>C</td><td>-0.723750000</td><td>0.000000000</td><td>-1.011675000</td></tr> <tr><td>C</td><td>0.000000000</td><td>1.076234000</td><td>-0.202173000</td></tr> <tr><td>C</td><td>0.000000000</td><td>-1.076234000</td><td>-0.202173000</td></tr> <tr><td>C</td><td>0.000000000</td><td>0.668799000</td><td>1.251754000</td></tr> <tr><td>C</td><td>0.000000000</td><td>-0.668799000</td><td>1.251754000</td></tr> <tr><td>H</td><td>1.482139000</td><td>0.000000000</td><td>-1.782197000</td></tr> <tr><td>H</td><td>-1.482139000</td><td>0.000000000</td><td>-1.782197000</td></tr> <tr><td>H</td><td>0.000000000</td><td>2.105997000</td><td>-0.537881000</td></tr> <tr><td>H</td><td>0.000000000</td><td>-2.105997000</td><td>-0.537881000</td></tr> <tr><td>H</td><td>0.000000000</td><td>1.347232000</td><td>2.092641000</td></tr> <tr><td>H</td><td>0.000000000</td><td>-1.347232000</td><td>2.092641000</td></tr> </tbody> </table> | C            | 0.723750000  | 0.000000000  | -1.011675000 | C | -0.723750000 | 0.000000000  | -1.011675000 | C | 0.000000000 | 1.076234000  | -0.202173000 | C                                                                                                                                                                                                                                                                                                                      | 0.000000000 | -1.076234000 | -0.202173000 | C           | 0.000000000  | 0.668799000  | 1.251754000  | C           | 0.000000000  | -0.668799000 | 1.251754000  | H | 1.482139000  | 0.000000000  | -1.782197000 | H | -1.482139000 | 0.000000000  | -1.782197000 | H | 0.000000000 | 2.105997000  | -0.537881000 | H | 0.000000000 | -2.105997000 | -0.537881000 | H | 0.000000000  | 1.347232000  | 2.092641000 | H | 0.000000000  | -1.347232000 | 2.092641000  | <p><b>2 (TS benzvalene to benzene in the S<sub>0</sub> state)</b></p> <p>E: -232.138507741 a.u.</p> <table border="1"> <tbody> <tr><td>C</td><td>0.543781000</td><td>-0.101597000</td><td>-1.010965000</td></tr> <tr><td>C</td><td>-0.753460000</td><td>0.306817000</td><td>-1.335305000</td></tr> <tr><td>C</td><td>-0.210293000</td><td>1.115596000</td><td>-0.143614000</td></tr> <tr><td>C</td><td>-0.080547000</td><td>0.682619000</td><td>1.193401000</td></tr> <tr><td>C</td><td>0.093878000</td><td>-0.712569000</td><td>1.257136000</td></tr> <tr><td>C</td><td>0.327652000</td><td>-1.197081000</td><td>-0.006624000</td></tr> <tr><td>H</td><td>1.493283000</td><td>0.062772000</td><td>-1.526624000</td></tr> <tr><td>H</td><td>-1.003958000</td><td>0.814092000</td><td>-2.265718000</td></tr> <tr><td>H</td><td>-0.087425000</td><td>2.166046000</td><td>-0.390957000</td></tr> <tr><td>H</td><td>-0.126925000</td><td>1.357344000</td><td>2.038379000</td></tr> <tr><td>H</td><td>-0.074972000</td><td>-1.315851000</td><td>2.139923000</td></tr> <tr><td>H</td><td>0.254131000</td><td>-2.227820000</td><td>-0.328092000</td></tr> </tbody> </table> <p>Imaginary frequency : 264i cm<sup>-1</sup></p>               | C | 0.543781000 | -0.101597000 | -1.010965000 | C | -0.753460000 | 0.306817000 | -1.335305000 | C | -0.210293000 | 1.115596000 | -0.143614000 | C | -0.080547000 | 0.682619000  | 1.193401000  | C | 0.093878000 | -0.712569000 | 1.257136000 | C | 0.327652000  | -1.197081000 | -0.006624000 | H | 1.493283000 | 0.062772000  | -1.526624000 | H | -1.003958000 | 0.814092000 | -2.265718000 | H | -0.087425000 | 2.166046000 | -0.390957000 | H | -0.126925000 | 1.357344000  | 2.038379000  | H | -0.074972000 | -1.315851000 | 2.139923000 | H | 0.254131000  | -2.227820000 | -0.328092000 |
| C                                                                                                                                                                                                                                                                                                                                                                                                                                                                                                                                                                                                                                                                                                                                                                                                                                                                                                                                                                                                                                                                                                                                                                  | 0.723750000  | 0.000000000  | -1.011675000 |              |   |              |              |              |   |             |              |              |                                                                                                                                                                                                                                                                                                                        |             |              |              |             |              |              |              |             |              |              |              |   |              |              |              |   |              |              |              |   |             |              |              |   |             |              |              |   |              |              |             |   |              |              |              |                                                                                                                                                                                                                                                                                                                                                                                                                                                                                                                                                                                                                                                                                                                                                                                                                                                                                                                                                                                                                                                                                                                                                                                                                                      |   |             |              |              |   |              |             |              |   |              |             |              |   |              |              |              |   |             |              |             |   |              |              |              |   |             |              |              |   |              |             |              |   |              |             |              |   |              |              |              |   |              |              |             |   |              |              |              |
| C                                                                                                                                                                                                                                                                                                                                                                                                                                                                                                                                                                                                                                                                                                                                                                                                                                                                                                                                                                                                                                                                                                                                                                  | -0.723750000 | 0.000000000  | -1.011675000 |              |   |              |              |              |   |             |              |              |                                                                                                                                                                                                                                                                                                                        |             |              |              |             |              |              |              |             |              |              |              |   |              |              |              |   |              |              |              |   |             |              |              |   |             |              |              |   |              |              |             |   |              |              |              |                                                                                                                                                                                                                                                                                                                                                                                                                                                                                                                                                                                                                                                                                                                                                                                                                                                                                                                                                                                                                                                                                                                                                                                                                                      |   |             |              |              |   |              |             |              |   |              |             |              |   |              |              |              |   |             |              |             |   |              |              |              |   |             |              |              |   |              |             |              |   |              |             |              |   |              |              |              |   |              |              |             |   |              |              |              |
| C                                                                                                                                                                                                                                                                                                                                                                                                                                                                                                                                                                                                                                                                                                                                                                                                                                                                                                                                                                                                                                                                                                                                                                  | 0.000000000  | 1.076234000  | -0.202173000 |              |   |              |              |              |   |             |              |              |                                                                                                                                                                                                                                                                                                                        |             |              |              |             |              |              |              |             |              |              |              |   |              |              |              |   |              |              |              |   |             |              |              |   |             |              |              |   |              |              |             |   |              |              |              |                                                                                                                                                                                                                                                                                                                                                                                                                                                                                                                                                                                                                                                                                                                                                                                                                                                                                                                                                                                                                                                                                                                                                                                                                                      |   |             |              |              |   |              |             |              |   |              |             |              |   |              |              |              |   |             |              |             |   |              |              |              |   |             |              |              |   |              |             |              |   |              |             |              |   |              |              |              |   |              |              |             |   |              |              |              |
| C                                                                                                                                                                                                                                                                                                                                                                                                                                                                                                                                                                                                                                                                                                                                                                                                                                                                                                                                                                                                                                                                                                                                                                  | 0.000000000  | -1.076234000 | -0.202173000 |              |   |              |              |              |   |             |              |              |                                                                                                                                                                                                                                                                                                                        |             |              |              |             |              |              |              |             |              |              |              |   |              |              |              |   |              |              |              |   |             |              |              |   |             |              |              |   |              |              |             |   |              |              |              |                                                                                                                                                                                                                                                                                                                                                                                                                                                                                                                                                                                                                                                                                                                                                                                                                                                                                                                                                                                                                                                                                                                                                                                                                                      |   |             |              |              |   |              |             |              |   |              |             |              |   |              |              |              |   |             |              |             |   |              |              |              |   |             |              |              |   |              |             |              |   |              |             |              |   |              |              |              |   |              |              |             |   |              |              |              |
| C                                                                                                                                                                                                                                                                                                                                                                                                                                                                                                                                                                                                                                                                                                                                                                                                                                                                                                                                                                                                                                                                                                                                                                  | 0.000000000  | 0.668799000  | 1.251754000  |              |   |              |              |              |   |             |              |              |                                                                                                                                                                                                                                                                                                                        |             |              |              |             |              |              |              |             |              |              |              |   |              |              |              |   |              |              |              |   |             |              |              |   |             |              |              |   |              |              |             |   |              |              |              |                                                                                                                                                                                                                                                                                                                                                                                                                                                                                                                                                                                                                                                                                                                                                                                                                                                                                                                                                                                                                                                                                                                                                                                                                                      |   |             |              |              |   |              |             |              |   |              |             |              |   |              |              |              |   |             |              |             |   |              |              |              |   |             |              |              |   |              |             |              |   |              |             |              |   |              |              |              |   |              |              |             |   |              |              |              |
| C                                                                                                                                                                                                                                                                                                                                                                                                                                                                                                                                                                                                                                                                                                                                                                                                                                                                                                                                                                                                                                                                                                                                                                  | 0.000000000  | -0.668799000 | 1.251754000  |              |   |              |              |              |   |             |              |              |                                                                                                                                                                                                                                                                                                                        |             |              |              |             |              |              |              |             |              |              |              |   |              |              |              |   |              |              |              |   |             |              |              |   |             |              |              |   |              |              |             |   |              |              |              |                                                                                                                                                                                                                                                                                                                                                                                                                                                                                                                                                                                                                                                                                                                                                                                                                                                                                                                                                                                                                                                                                                                                                                                                                                      |   |             |              |              |   |              |             |              |   |              |             |              |   |              |              |              |   |             |              |             |   |              |              |              |   |             |              |              |   |              |             |              |   |              |             |              |   |              |              |              |   |              |              |             |   |              |              |              |
| H                                                                                                                                                                                                                                                                                                                                                                                                                                                                                                                                                                                                                                                                                                                                                                                                                                                                                                                                                                                                                                                                                                                                                                  | 1.482139000  | 0.000000000  | -1.782197000 |              |   |              |              |              |   |             |              |              |                                                                                                                                                                                                                                                                                                                        |             |              |              |             |              |              |              |             |              |              |              |   |              |              |              |   |              |              |              |   |             |              |              |   |             |              |              |   |              |              |             |   |              |              |              |                                                                                                                                                                                                                                                                                                                                                                                                                                                                                                                                                                                                                                                                                                                                                                                                                                                                                                                                                                                                                                                                                                                                                                                                                                      |   |             |              |              |   |              |             |              |   |              |             |              |   |              |              |              |   |             |              |             |   |              |              |              |   |             |              |              |   |              |             |              |   |              |             |              |   |              |              |              |   |              |              |             |   |              |              |              |
| H                                                                                                                                                                                                                                                                                                                                                                                                                                                                                                                                                                                                                                                                                                                                                                                                                                                                                                                                                                                                                                                                                                                                                                  | -1.482139000 | 0.000000000  | -1.782197000 |              |   |              |              |              |   |             |              |              |                                                                                                                                                                                                                                                                                                                        |             |              |              |             |              |              |              |             |              |              |              |   |              |              |              |   |              |              |              |   |             |              |              |   |             |              |              |   |              |              |             |   |              |              |              |                                                                                                                                                                                                                                                                                                                                                                                                                                                                                                                                                                                                                                                                                                                                                                                                                                                                                                                                                                                                                                                                                                                                                                                                                                      |   |             |              |              |   |              |             |              |   |              |             |              |   |              |              |              |   |             |              |             |   |              |              |              |   |             |              |              |   |              |             |              |   |              |             |              |   |              |              |              |   |              |              |             |   |              |              |              |
| H                                                                                                                                                                                                                                                                                                                                                                                                                                                                                                                                                                                                                                                                                                                                                                                                                                                                                                                                                                                                                                                                                                                                                                  | 0.000000000  | 2.105997000  | -0.537881000 |              |   |              |              |              |   |             |              |              |                                                                                                                                                                                                                                                                                                                        |             |              |              |             |              |              |              |             |              |              |              |   |              |              |              |   |              |              |              |   |             |              |              |   |             |              |              |   |              |              |             |   |              |              |              |                                                                                                                                                                                                                                                                                                                                                                                                                                                                                                                                                                                                                                                                                                                                                                                                                                                                                                                                                                                                                                                                                                                                                                                                                                      |   |             |              |              |   |              |             |              |   |              |             |              |   |              |              |              |   |             |              |             |   |              |              |              |   |             |              |              |   |              |             |              |   |              |             |              |   |              |              |              |   |              |              |             |   |              |              |              |
| H                                                                                                                                                                                                                                                                                                                                                                                                                                                                                                                                                                                                                                                                                                                                                                                                                                                                                                                                                                                                                                                                                                                                                                  | 0.000000000  | -2.105997000 | -0.537881000 |              |   |              |              |              |   |             |              |              |                                                                                                                                                                                                                                                                                                                        |             |              |              |             |              |              |              |             |              |              |              |   |              |              |              |   |              |              |              |   |             |              |              |   |             |              |              |   |              |              |             |   |              |              |              |                                                                                                                                                                                                                                                                                                                                                                                                                                                                                                                                                                                                                                                                                                                                                                                                                                                                                                                                                                                                                                                                                                                                                                                                                                      |   |             |              |              |   |              |             |              |   |              |             |              |   |              |              |              |   |             |              |             |   |              |              |              |   |             |              |              |   |              |             |              |   |              |             |              |   |              |              |              |   |              |              |             |   |              |              |              |
| H                                                                                                                                                                                                                                                                                                                                                                                                                                                                                                                                                                                                                                                                                                                                                                                                                                                                                                                                                                                                                                                                                                                                                                  | 0.000000000  | 1.347232000  | 2.092641000  |              |   |              |              |              |   |             |              |              |                                                                                                                                                                                                                                                                                                                        |             |              |              |             |              |              |              |             |              |              |              |   |              |              |              |   |              |              |              |   |             |              |              |   |             |              |              |   |              |              |             |   |              |              |              |                                                                                                                                                                                                                                                                                                                                                                                                                                                                                                                                                                                                                                                                                                                                                                                                                                                                                                                                                                                                                                                                                                                                                                                                                                      |   |             |              |              |   |              |             |              |   |              |             |              |   |              |              |              |   |             |              |             |   |              |              |              |   |             |              |              |   |              |             |              |   |              |             |              |   |              |              |              |   |              |              |             |   |              |              |              |
| H                                                                                                                                                                                                                                                                                                                                                                                                                                                                                                                                                                                                                                                                                                                                                                                                                                                                                                                                                                                                                                                                                                                                                                  | 0.000000000  | -1.347232000 | 2.092641000  |              |   |              |              |              |   |             |              |              |                                                                                                                                                                                                                                                                                                                        |             |              |              |             |              |              |              |             |              |              |              |   |              |              |              |   |              |              |              |   |             |              |              |   |             |              |              |   |              |              |             |   |              |              |              |                                                                                                                                                                                                                                                                                                                                                                                                                                                                                                                                                                                                                                                                                                                                                                                                                                                                                                                                                                                                                                                                                                                                                                                                                                      |   |             |              |              |   |              |             |              |   |              |             |              |   |              |              |              |   |             |              |             |   |              |              |              |   |             |              |              |   |              |             |              |   |              |             |              |   |              |              |              |   |              |              |             |   |              |              |              |
| C                                                                                                                                                                                                                                                                                                                                                                                                                                                                                                                                                                                                                                                                                                                                                                                                                                                                                                                                                                                                                                                                                                                                                                  | 0.543781000  | -0.101597000 | -1.010965000 |              |   |              |              |              |   |             |              |              |                                                                                                                                                                                                                                                                                                                        |             |              |              |             |              |              |              |             |              |              |              |   |              |              |              |   |              |              |              |   |             |              |              |   |             |              |              |   |              |              |             |   |              |              |              |                                                                                                                                                                                                                                                                                                                                                                                                                                                                                                                                                                                                                                                                                                                                                                                                                                                                                                                                                                                                                                                                                                                                                                                                                                      |   |             |              |              |   |              |             |              |   |              |             |              |   |              |              |              |   |             |              |             |   |              |              |              |   |             |              |              |   |              |             |              |   |              |             |              |   |              |              |              |   |              |              |             |   |              |              |              |
| C                                                                                                                                                                                                                                                                                                                                                                                                                                                                                                                                                                                                                                                                                                                                                                                                                                                                                                                                                                                                                                                                                                                                                                  | -0.753460000 | 0.306817000  | -1.335305000 |              |   |              |              |              |   |             |              |              |                                                                                                                                                                                                                                                                                                                        |             |              |              |             |              |              |              |             |              |              |              |   |              |              |              |   |              |              |              |   |             |              |              |   |             |              |              |   |              |              |             |   |              |              |              |                                                                                                                                                                                                                                                                                                                                                                                                                                                                                                                                                                                                                                                                                                                                                                                                                                                                                                                                                                                                                                                                                                                                                                                                                                      |   |             |              |              |   |              |             |              |   |              |             |              |   |              |              |              |   |             |              |             |   |              |              |              |   |             |              |              |   |              |             |              |   |              |             |              |   |              |              |              |   |              |              |             |   |              |              |              |
| C                                                                                                                                                                                                                                                                                                                                                                                                                                                                                                                                                                                                                                                                                                                                                                                                                                                                                                                                                                                                                                                                                                                                                                  | -0.210293000 | 1.115596000  | -0.143614000 |              |   |              |              |              |   |             |              |              |                                                                                                                                                                                                                                                                                                                        |             |              |              |             |              |              |              |             |              |              |              |   |              |              |              |   |              |              |              |   |             |              |              |   |             |              |              |   |              |              |             |   |              |              |              |                                                                                                                                                                                                                                                                                                                                                                                                                                                                                                                                                                                                                                                                                                                                                                                                                                                                                                                                                                                                                                                                                                                                                                                                                                      |   |             |              |              |   |              |             |              |   |              |             |              |   |              |              |              |   |             |              |             |   |              |              |              |   |             |              |              |   |              |             |              |   |              |             |              |   |              |              |              |   |              |              |             |   |              |              |              |
| C                                                                                                                                                                                                                                                                                                                                                                                                                                                                                                                                                                                                                                                                                                                                                                                                                                                                                                                                                                                                                                                                                                                                                                  | -0.080547000 | 0.682619000  | 1.193401000  |              |   |              |              |              |   |             |              |              |                                                                                                                                                                                                                                                                                                                        |             |              |              |             |              |              |              |             |              |              |              |   |              |              |              |   |              |              |              |   |             |              |              |   |             |              |              |   |              |              |             |   |              |              |              |                                                                                                                                                                                                                                                                                                                                                                                                                                                                                                                                                                                                                                                                                                                                                                                                                                                                                                                                                                                                                                                                                                                                                                                                                                      |   |             |              |              |   |              |             |              |   |              |             |              |   |              |              |              |   |             |              |             |   |              |              |              |   |             |              |              |   |              |             |              |   |              |             |              |   |              |              |              |   |              |              |             |   |              |              |              |
| C                                                                                                                                                                                                                                                                                                                                                                                                                                                                                                                                                                                                                                                                                                                                                                                                                                                                                                                                                                                                                                                                                                                                                                  | 0.093878000  | -0.712569000 | 1.257136000  |              |   |              |              |              |   |             |              |              |                                                                                                                                                                                                                                                                                                                        |             |              |              |             |              |              |              |             |              |              |              |   |              |              |              |   |              |              |              |   |             |              |              |   |             |              |              |   |              |              |             |   |              |              |              |                                                                                                                                                                                                                                                                                                                                                                                                                                                                                                                                                                                                                                                                                                                                                                                                                                                                                                                                                                                                                                                                                                                                                                                                                                      |   |             |              |              |   |              |             |              |   |              |             |              |   |              |              |              |   |             |              |             |   |              |              |              |   |             |              |              |   |              |             |              |   |              |             |              |   |              |              |              |   |              |              |             |   |              |              |              |
| C                                                                                                                                                                                                                                                                                                                                                                                                                                                                                                                                                                                                                                                                                                                                                                                                                                                                                                                                                                                                                                                                                                                                                                  | 0.327652000  | -1.197081000 | -0.006624000 |              |   |              |              |              |   |             |              |              |                                                                                                                                                                                                                                                                                                                        |             |              |              |             |              |              |              |             |              |              |              |   |              |              |              |   |              |              |              |   |             |              |              |   |             |              |              |   |              |              |             |   |              |              |              |                                                                                                                                                                                                                                                                                                                                                                                                                                                                                                                                                                                                                                                                                                                                                                                                                                                                                                                                                                                                                                                                                                                                                                                                                                      |   |             |              |              |   |              |             |              |   |              |             |              |   |              |              |              |   |             |              |             |   |              |              |              |   |             |              |              |   |              |             |              |   |              |             |              |   |              |              |              |   |              |              |             |   |              |              |              |
| H                                                                                                                                                                                                                                                                                                                                                                                                                                                                                                                                                                                                                                                                                                                                                                                                                                                                                                                                                                                                                                                                                                                                                                  | 1.493283000  | 0.062772000  | -1.526624000 |              |   |              |              |              |   |             |              |              |                                                                                                                                                                                                                                                                                                                        |             |              |              |             |              |              |              |             |              |              |              |   |              |              |              |   |              |              |              |   |             |              |              |   |             |              |              |   |              |              |             |   |              |              |              |                                                                                                                                                                                                                                                                                                                                                                                                                                                                                                                                                                                                                                                                                                                                                                                                                                                                                                                                                                                                                                                                                                                                                                                                                                      |   |             |              |              |   |              |             |              |   |              |             |              |   |              |              |              |   |             |              |             |   |              |              |              |   |             |              |              |   |              |             |              |   |              |             |              |   |              |              |              |   |              |              |             |   |              |              |              |
| H                                                                                                                                                                                                                                                                                                                                                                                                                                                                                                                                                                                                                                                                                                                                                                                                                                                                                                                                                                                                                                                                                                                                                                  | -1.003958000 | 0.814092000  | -2.265718000 |              |   |              |              |              |   |             |              |              |                                                                                                                                                                                                                                                                                                                        |             |              |              |             |              |              |              |             |              |              |              |   |              |              |              |   |              |              |              |   |             |              |              |   |             |              |              |   |              |              |             |   |              |              |              |                                                                                                                                                                                                                                                                                                                                                                                                                                                                                                                                                                                                                                                                                                                                                                                                                                                                                                                                                                                                                                                                                                                                                                                                                                      |   |             |              |              |   |              |             |              |   |              |             |              |   |              |              |              |   |             |              |             |   |              |              |              |   |             |              |              |   |              |             |              |   |              |             |              |   |              |              |              |   |              |              |             |   |              |              |              |
| H                                                                                                                                                                                                                                                                                                                                                                                                                                                                                                                                                                                                                                                                                                                                                                                                                                                                                                                                                                                                                                                                                                                                                                  | -0.087425000 | 2.166046000  | -0.390957000 |              |   |              |              |              |   |             |              |              |                                                                                                                                                                                                                                                                                                                        |             |              |              |             |              |              |              |             |              |              |              |   |              |              |              |   |              |              |              |   |             |              |              |   |             |              |              |   |              |              |             |   |              |              |              |                                                                                                                                                                                                                                                                                                                                                                                                                                                                                                                                                                                                                                                                                                                                                                                                                                                                                                                                                                                                                                                                                                                                                                                                                                      |   |             |              |              |   |              |             |              |   |              |             |              |   |              |              |              |   |             |              |             |   |              |              |              |   |             |              |              |   |              |             |              |   |              |             |              |   |              |              |              |   |              |              |             |   |              |              |              |
| H                                                                                                                                                                                                                                                                                                                                                                                                                                                                                                                                                                                                                                                                                                                                                                                                                                                                                                                                                                                                                                                                                                                                                                  | -0.126925000 | 1.357344000  | 2.038379000  |              |   |              |              |              |   |             |              |              |                                                                                                                                                                                                                                                                                                                        |             |              |              |             |              |              |              |             |              |              |              |   |              |              |              |   |              |              |              |   |             |              |              |   |             |              |              |   |              |              |             |   |              |              |              |                                                                                                                                                                                                                                                                                                                                                                                                                                                                                                                                                                                                                                                                                                                                                                                                                                                                                                                                                                                                                                                                                                                                                                                                                                      |   |             |              |              |   |              |             |              |   |              |             |              |   |              |              |              |   |             |              |             |   |              |              |              |   |             |              |              |   |              |             |              |   |              |             |              |   |              |              |              |   |              |              |             |   |              |              |              |
| H                                                                                                                                                                                                                                                                                                                                                                                                                                                                                                                                                                                                                                                                                                                                                                                                                                                                                                                                                                                                                                                                                                                                                                  | -0.074972000 | -1.315851000 | 2.139923000  |              |   |              |              |              |   |             |              |              |                                                                                                                                                                                                                                                                                                                        |             |              |              |             |              |              |              |             |              |              |              |   |              |              |              |   |              |              |              |   |             |              |              |   |             |              |              |   |              |              |             |   |              |              |              |                                                                                                                                                                                                                                                                                                                                                                                                                                                                                                                                                                                                                                                                                                                                                                                                                                                                                                                                                                                                                                                                                                                                                                                                                                      |   |             |              |              |   |              |             |              |   |              |             |              |   |              |              |              |   |             |              |             |   |              |              |              |   |             |              |              |   |              |             |              |   |              |             |              |   |              |              |              |   |              |              |             |   |              |              |              |
| H                                                                                                                                                                                                                                                                                                                                                                                                                                                                                                                                                                                                                                                                                                                                                                                                                                                                                                                                                                                                                                                                                                                                                                  | 0.254131000  | -2.227820000 | -0.328092000 |              |   |              |              |              |   |             |              |              |                                                                                                                                                                                                                                                                                                                        |             |              |              |             |              |              |              |             |              |              |              |   |              |              |              |   |              |              |              |   |             |              |              |   |             |              |              |   |              |              |             |   |              |              |              |                                                                                                                                                                                                                                                                                                                                                                                                                                                                                                                                                                                                                                                                                                                                                                                                                                                                                                                                                                                                                                                                                                                                                                                                                                      |   |             |              |              |   |              |             |              |   |              |             |              |   |              |              |              |   |             |              |             |   |              |              |              |   |             |              |              |   |              |             |              |   |              |             |              |   |              |              |              |   |              |              |             |   |              |              |              |
| <p><b>3 (Benzene in the S<sub>0</sub> state)</b></p> <p>E: -232.311270767 a.u.</p> <table border="1"> <tbody> <tr><td>C</td><td>0.000000000</td><td>1.394724000</td><td>0.000000000</td></tr> <tr><td>C</td><td>1.207866000</td><td>0.697362000</td><td>0.000000000</td></tr> <tr><td>C</td><td>1.207866000</td><td>-0.697362000</td><td>0.000000000</td></tr> <tr><td>C</td><td>0.000000000</td><td>-1.394724000</td><td>0.000000000</td></tr> <tr><td>C</td><td>-1.207866000</td><td>-0.697362000</td><td>0.000000000</td></tr> <tr><td>C</td><td>-1.207866000</td><td>0.697362000</td><td>0.000000000</td></tr> <tr><td>H</td><td>0.000000000</td><td>2.479163000</td><td>0.000000000</td></tr> <tr><td>H</td><td>2.147018000</td><td>1.239581000</td><td>0.000000000</td></tr> <tr><td>H</td><td>2.147018000</td><td>-1.239581000</td><td>0.000000000</td></tr> <tr><td>H</td><td>0.000000000</td><td>-2.479163000</td><td>0.000000000</td></tr> <tr><td>H</td><td>-2.147018000</td><td>-1.239581000</td><td>0.000000000</td></tr> <tr><td>H</td><td>-2.147018000</td><td>1.239581000</td><td>0.000000000</td></tr> </tbody> </table>                          | C            | 0.000000000  | 1.394724000  | 0.000000000  | C | 1.207866000  | 0.697362000  | 0.000000000  | C | 1.207866000 | -0.697362000 | 0.000000000  | C                                                                                                                                                                                                                                                                                                                      | 0.000000000 | -1.394724000 | 0.000000000  | C           | -1.207866000 | -0.697362000 | 0.000000000  | C           | -1.207866000 | 0.697362000  | 0.000000000  | H | 0.000000000  | 2.479163000  | 0.000000000  | H | 2.147018000  | 1.239581000  | 0.000000000  | H | 2.147018000 | -1.239581000 | 0.000000000  | H | 0.000000000 | -2.479163000 | 0.000000000  | H | -2.147018000 | -1.239581000 | 0.000000000 | H | -2.147018000 | 1.239581000  | 0.000000000  | <p><b>4 (Benzvalene vertically excited to the T<sub>1</sub> state)</b></p> <p>E : -232.047580612 a.u.</p> <table border="1"> <tbody> <tr><td>C</td><td>0.723750000</td><td>0.000000000</td><td>-1.011675000</td></tr> <tr><td>C</td><td>-0.723750000</td><td>0.000000000</td><td>-1.011675000</td></tr> <tr><td>C</td><td>0.000000000</td><td>1.076234000</td><td>-0.202173000</td></tr> <tr><td>C</td><td>0.000000000</td><td>-1.076234000</td><td>-0.202173000</td></tr> <tr><td>C</td><td>0.000000000</td><td>0.668799000</td><td>1.251754000</td></tr> <tr><td>C</td><td>0.000000000</td><td>-0.668799000</td><td>1.251754000</td></tr> <tr><td>H</td><td>1.482139000</td><td>0.000000000</td><td>-1.782197000</td></tr> <tr><td>H</td><td>-1.482139000</td><td>0.000000000</td><td>-1.782197000</td></tr> <tr><td>H</td><td>0.000000000</td><td>2.105997000</td><td>-0.537881000</td></tr> <tr><td>H</td><td>0.000000000</td><td>-2.105997000</td><td>-0.537881000</td></tr> <tr><td>H</td><td>0.000000000</td><td>1.347232000</td><td>2.092641000</td></tr> <tr><td>H</td><td>0.000000000</td><td>-1.347232000</td><td>2.092641000</td></tr> </tbody> </table> <p>Imaginary frequencies : 652i, 350i, 273i cm<sup>-1</sup></p> | C | 0.723750000 | 0.000000000  | -1.011675000 | C | -0.723750000 | 0.000000000 | -1.011675000 | C | 0.000000000  | 1.076234000 | -0.202173000 | C | 0.000000000  | -1.076234000 | -0.202173000 | C | 0.000000000 | 0.668799000  | 1.251754000 | C | 0.000000000  | -0.668799000 | 1.251754000  | H | 1.482139000 | 0.000000000  | -1.782197000 | H | -1.482139000 | 0.000000000 | -1.782197000 | H | 0.000000000  | 2.105997000 | -0.537881000 | H | 0.000000000  | -2.105997000 | -0.537881000 | H | 0.000000000  | 1.347232000  | 2.092641000 | H | 0.000000000  | -1.347232000 | 2.092641000  |
| C                                                                                                                                                                                                                                                                                                                                                                                                                                                                                                                                                                                                                                                                                                                                                                                                                                                                                                                                                                                                                                                                                                                                                                  | 0.000000000  | 1.394724000  | 0.000000000  |              |   |              |              |              |   |             |              |              |                                                                                                                                                                                                                                                                                                                        |             |              |              |             |              |              |              |             |              |              |              |   |              |              |              |   |              |              |              |   |             |              |              |   |             |              |              |   |              |              |             |   |              |              |              |                                                                                                                                                                                                                                                                                                                                                                                                                                                                                                                                                                                                                                                                                                                                                                                                                                                                                                                                                                                                                                                                                                                                                                                                                                      |   |             |              |              |   |              |             |              |   |              |             |              |   |              |              |              |   |             |              |             |   |              |              |              |   |             |              |              |   |              |             |              |   |              |             |              |   |              |              |              |   |              |              |             |   |              |              |              |
| C                                                                                                                                                                                                                                                                                                                                                                                                                                                                                                                                                                                                                                                                                                                                                                                                                                                                                                                                                                                                                                                                                                                                                                  | 1.207866000  | 0.697362000  | 0.000000000  |              |   |              |              |              |   |             |              |              |                                                                                                                                                                                                                                                                                                                        |             |              |              |             |              |              |              |             |              |              |              |   |              |              |              |   |              |              |              |   |             |              |              |   |             |              |              |   |              |              |             |   |              |              |              |                                                                                                                                                                                                                                                                                                                                                                                                                                                                                                                                                                                                                                                                                                                                                                                                                                                                                                                                                                                                                                                                                                                                                                                                                                      |   |             |              |              |   |              |             |              |   |              |             |              |   |              |              |              |   |             |              |             |   |              |              |              |   |             |              |              |   |              |             |              |   |              |             |              |   |              |              |              |   |              |              |             |   |              |              |              |
| C                                                                                                                                                                                                                                                                                                                                                                                                                                                                                                                                                                                                                                                                                                                                                                                                                                                                                                                                                                                                                                                                                                                                                                  | 1.207866000  | -0.697362000 | 0.000000000  |              |   |              |              |              |   |             |              |              |                                                                                                                                                                                                                                                                                                                        |             |              |              |             |              |              |              |             |              |              |              |   |              |              |              |   |              |              |              |   |             |              |              |   |             |              |              |   |              |              |             |   |              |              |              |                                                                                                                                                                                                                                                                                                                                                                                                                                                                                                                                                                                                                                                                                                                                                                                                                                                                                                                                                                                                                                                                                                                                                                                                                                      |   |             |              |              |   |              |             |              |   |              |             |              |   |              |              |              |   |             |              |             |   |              |              |              |   |             |              |              |   |              |             |              |   |              |             |              |   |              |              |              |   |              |              |             |   |              |              |              |
| C                                                                                                                                                                                                                                                                                                                                                                                                                                                                                                                                                                                                                                                                                                                                                                                                                                                                                                                                                                                                                                                                                                                                                                  | 0.000000000  | -1.394724000 | 0.000000000  |              |   |              |              |              |   |             |              |              |                                                                                                                                                                                                                                                                                                                        |             |              |              |             |              |              |              |             |              |              |              |   |              |              |              |   |              |              |              |   |             |              |              |   |             |              |              |   |              |              |             |   |              |              |              |                                                                                                                                                                                                                                                                                                                                                                                                                                                                                                                                                                                                                                                                                                                                                                                                                                                                                                                                                                                                                                                                                                                                                                                                                                      |   |             |              |              |   |              |             |              |   |              |             |              |   |              |              |              |   |             |              |             |   |              |              |              |   |             |              |              |   |              |             |              |   |              |             |              |   |              |              |              |   |              |              |             |   |              |              |              |
| C                                                                                                                                                                                                                                                                                                                                                                                                                                                                                                                                                                                                                                                                                                                                                                                                                                                                                                                                                                                                                                                                                                                                                                  | -1.207866000 | -0.697362000 | 0.000000000  |              |   |              |              |              |   |             |              |              |                                                                                                                                                                                                                                                                                                                        |             |              |              |             |              |              |              |             |              |              |              |   |              |              |              |   |              |              |              |   |             |              |              |   |             |              |              |   |              |              |             |   |              |              |              |                                                                                                                                                                                                                                                                                                                                                                                                                                                                                                                                                                                                                                                                                                                                                                                                                                                                                                                                                                                                                                                                                                                                                                                                                                      |   |             |              |              |   |              |             |              |   |              |             |              |   |              |              |              |   |             |              |             |   |              |              |              |   |             |              |              |   |              |             |              |   |              |             |              |   |              |              |              |   |              |              |             |   |              |              |              |
| C                                                                                                                                                                                                                                                                                                                                                                                                                                                                                                                                                                                                                                                                                                                                                                                                                                                                                                                                                                                                                                                                                                                                                                  | -1.207866000 | 0.697362000  | 0.000000000  |              |   |              |              |              |   |             |              |              |                                                                                                                                                                                                                                                                                                                        |             |              |              |             |              |              |              |             |              |              |              |   |              |              |              |   |              |              |              |   |             |              |              |   |             |              |              |   |              |              |             |   |              |              |              |                                                                                                                                                                                                                                                                                                                                                                                                                                                                                                                                                                                                                                                                                                                                                                                                                                                                                                                                                                                                                                                                                                                                                                                                                                      |   |             |              |              |   |              |             |              |   |              |             |              |   |              |              |              |   |             |              |             |   |              |              |              |   |             |              |              |   |              |             |              |   |              |             |              |   |              |              |              |   |              |              |             |   |              |              |              |
| H                                                                                                                                                                                                                                                                                                                                                                                                                                                                                                                                                                                                                                                                                                                                                                                                                                                                                                                                                                                                                                                                                                                                                                  | 0.000000000  | 2.479163000  | 0.000000000  |              |   |              |              |              |   |             |              |              |                                                                                                                                                                                                                                                                                                                        |             |              |              |             |              |              |              |             |              |              |              |   |              |              |              |   |              |              |              |   |             |              |              |   |             |              |              |   |              |              |             |   |              |              |              |                                                                                                                                                                                                                                                                                                                                                                                                                                                                                                                                                                                                                                                                                                                                                                                                                                                                                                                                                                                                                                                                                                                                                                                                                                      |   |             |              |              |   |              |             |              |   |              |             |              |   |              |              |              |   |             |              |             |   |              |              |              |   |             |              |              |   |              |             |              |   |              |             |              |   |              |              |              |   |              |              |             |   |              |              |              |
| H                                                                                                                                                                                                                                                                                                                                                                                                                                                                                                                                                                                                                                                                                                                                                                                                                                                                                                                                                                                                                                                                                                                                                                  | 2.147018000  | 1.239581000  | 0.000000000  |              |   |              |              |              |   |             |              |              |                                                                                                                                                                                                                                                                                                                        |             |              |              |             |              |              |              |             |              |              |              |   |              |              |              |   |              |              |              |   |             |              |              |   |             |              |              |   |              |              |             |   |              |              |              |                                                                                                                                                                                                                                                                                                                                                                                                                                                                                                                                                                                                                                                                                                                                                                                                                                                                                                                                                                                                                                                                                                                                                                                                                                      |   |             |              |              |   |              |             |              |   |              |             |              |   |              |              |              |   |             |              |             |   |              |              |              |   |             |              |              |   |              |             |              |   |              |             |              |   |              |              |              |   |              |              |             |   |              |              |              |
| H                                                                                                                                                                                                                                                                                                                                                                                                                                                                                                                                                                                                                                                                                                                                                                                                                                                                                                                                                                                                                                                                                                                                                                  | 2.147018000  | -1.239581000 | 0.000000000  |              |   |              |              |              |   |             |              |              |                                                                                                                                                                                                                                                                                                                        |             |              |              |             |              |              |              |             |              |              |              |   |              |              |              |   |              |              |              |   |             |              |              |   |             |              |              |   |              |              |             |   |              |              |              |                                                                                                                                                                                                                                                                                                                                                                                                                                                                                                                                                                                                                                                                                                                                                                                                                                                                                                                                                                                                                                                                                                                                                                                                                                      |   |             |              |              |   |              |             |              |   |              |             |              |   |              |              |              |   |             |              |             |   |              |              |              |   |             |              |              |   |              |             |              |   |              |             |              |   |              |              |              |   |              |              |             |   |              |              |              |
| H                                                                                                                                                                                                                                                                                                                                                                                                                                                                                                                                                                                                                                                                                                                                                                                                                                                                                                                                                                                                                                                                                                                                                                  | 0.000000000  | -2.479163000 | 0.000000000  |              |   |              |              |              |   |             |              |              |                                                                                                                                                                                                                                                                                                                        |             |              |              |             |              |              |              |             |              |              |              |   |              |              |              |   |              |              |              |   |             |              |              |   |             |              |              |   |              |              |             |   |              |              |              |                                                                                                                                                                                                                                                                                                                                                                                                                                                                                                                                                                                                                                                                                                                                                                                                                                                                                                                                                                                                                                                                                                                                                                                                                                      |   |             |              |              |   |              |             |              |   |              |             |              |   |              |              |              |   |             |              |             |   |              |              |              |   |             |              |              |   |              |             |              |   |              |             |              |   |              |              |              |   |              |              |             |   |              |              |              |
| H                                                                                                                                                                                                                                                                                                                                                                                                                                                                                                                                                                                                                                                                                                                                                                                                                                                                                                                                                                                                                                                                                                                                                                  | -2.147018000 | -1.239581000 | 0.000000000  |              |   |              |              |              |   |             |              |              |                                                                                                                                                                                                                                                                                                                        |             |              |              |             |              |              |              |             |              |              |              |   |              |              |              |   |              |              |              |   |             |              |              |   |             |              |              |   |              |              |             |   |              |              |              |                                                                                                                                                                                                                                                                                                                                                                                                                                                                                                                                                                                                                                                                                                                                                                                                                                                                                                                                                                                                                                                                                                                                                                                                                                      |   |             |              |              |   |              |             |              |   |              |             |              |   |              |              |              |   |             |              |             |   |              |              |              |   |             |              |              |   |              |             |              |   |              |             |              |   |              |              |              |   |              |              |             |   |              |              |              |
| H                                                                                                                                                                                                                                                                                                                                                                                                                                                                                                                                                                                                                                                                                                                                                                                                                                                                                                                                                                                                                                                                                                                                                                  | -2.147018000 | 1.239581000  | 0.000000000  |              |   |              |              |              |   |             |              |              |                                                                                                                                                                                                                                                                                                                        |             |              |              |             |              |              |              |             |              |              |              |   |              |              |              |   |              |              |              |   |             |              |              |   |             |              |              |   |              |              |             |   |              |              |              |                                                                                                                                                                                                                                                                                                                                                                                                                                                                                                                                                                                                                                                                                                                                                                                                                                                                                                                                                                                                                                                                                                                                                                                                                                      |   |             |              |              |   |              |             |              |   |              |             |              |   |              |              |              |   |             |              |             |   |              |              |              |   |             |              |              |   |              |             |              |   |              |             |              |   |              |              |              |   |              |              |             |   |              |              |              |
| C                                                                                                                                                                                                                                                                                                                                                                                                                                                                                                                                                                                                                                                                                                                                                                                                                                                                                                                                                                                                                                                                                                                                                                  | 0.723750000  | 0.000000000  | -1.011675000 |              |   |              |              |              |   |             |              |              |                                                                                                                                                                                                                                                                                                                        |             |              |              |             |              |              |              |             |              |              |              |   |              |              |              |   |              |              |              |   |             |              |              |   |             |              |              |   |              |              |             |   |              |              |              |                                                                                                                                                                                                                                                                                                                                                                                                                                                                                                                                                                                                                                                                                                                                                                                                                                                                                                                                                                                                                                                                                                                                                                                                                                      |   |             |              |              |   |              |             |              |   |              |             |              |   |              |              |              |   |             |              |             |   |              |              |              |   |             |              |              |   |              |             |              |   |              |             |              |   |              |              |              |   |              |              |             |   |              |              |              |
| C                                                                                                                                                                                                                                                                                                                                                                                                                                                                                                                                                                                                                                                                                                                                                                                                                                                                                                                                                                                                                                                                                                                                                                  | -0.723750000 | 0.000000000  | -1.011675000 |              |   |              |              |              |   |             |              |              |                                                                                                                                                                                                                                                                                                                        |             |              |              |             |              |              |              |             |              |              |              |   |              |              |              |   |              |              |              |   |             |              |              |   |             |              |              |   |              |              |             |   |              |              |              |                                                                                                                                                                                                                                                                                                                                                                                                                                                                                                                                                                                                                                                                                                                                                                                                                                                                                                                                                                                                                                                                                                                                                                                                                                      |   |             |              |              |   |              |             |              |   |              |             |              |   |              |              |              |   |             |              |             |   |              |              |              |   |             |              |              |   |              |             |              |   |              |             |              |   |              |              |              |   |              |              |             |   |              |              |              |
| C                                                                                                                                                                                                                                                                                                                                                                                                                                                                                                                                                                                                                                                                                                                                                                                                                                                                                                                                                                                                                                                                                                                                                                  | 0.000000000  | 1.076234000  | -0.202173000 |              |   |              |              |              |   |             |              |              |                                                                                                                                                                                                                                                                                                                        |             |              |              |             |              |              |              |             |              |              |              |   |              |              |              |   |              |              |              |   |             |              |              |   |             |              |              |   |              |              |             |   |              |              |              |                                                                                                                                                                                                                                                                                                                                                                                                                                                                                                                                                                                                                                                                                                                                                                                                                                                                                                                                                                                                                                                                                                                                                                                                                                      |   |             |              |              |   |              |             |              |   |              |             |              |   |              |              |              |   |             |              |             |   |              |              |              |   |             |              |              |   |              |             |              |   |              |             |              |   |              |              |              |   |              |              |             |   |              |              |              |
| C                                                                                                                                                                                                                                                                                                                                                                                                                                                                                                                                                                                                                                                                                                                                                                                                                                                                                                                                                                                                                                                                                                                                                                  | 0.000000000  | -1.076234000 | -0.202173000 |              |   |              |              |              |   |             |              |              |                                                                                                                                                                                                                                                                                                                        |             |              |              |             |              |              |              |             |              |              |              |   |              |              |              |   |              |              |              |   |             |              |              |   |             |              |              |   |              |              |             |   |              |              |              |                                                                                                                                                                                                                                                                                                                                                                                                                                                                                                                                                                                                                                                                                                                                                                                                                                                                                                                                                                                                                                                                                                                                                                                                                                      |   |             |              |              |   |              |             |              |   |              |             |              |   |              |              |              |   |             |              |             |   |              |              |              |   |             |              |              |   |              |             |              |   |              |             |              |   |              |              |              |   |              |              |             |   |              |              |              |
| C                                                                                                                                                                                                                                                                                                                                                                                                                                                                                                                                                                                                                                                                                                                                                                                                                                                                                                                                                                                                                                                                                                                                                                  | 0.000000000  | 0.668799000  | 1.251754000  |              |   |              |              |              |   |             |              |              |                                                                                                                                                                                                                                                                                                                        |             |              |              |             |              |              |              |             |              |              |              |   |              |              |              |   |              |              |              |   |             |              |              |   |             |              |              |   |              |              |             |   |              |              |              |                                                                                                                                                                                                                                                                                                                                                                                                                                                                                                                                                                                                                                                                                                                                                                                                                                                                                                                                                                                                                                                                                                                                                                                                                                      |   |             |              |              |   |              |             |              |   |              |             |              |   |              |              |              |   |             |              |             |   |              |              |              |   |             |              |              |   |              |             |              |   |              |             |              |   |              |              |              |   |              |              |             |   |              |              |              |
| C                                                                                                                                                                                                                                                                                                                                                                                                                                                                                                                                                                                                                                                                                                                                                                                                                                                                                                                                                                                                                                                                                                                                                                  | 0.000000000  | -0.668799000 | 1.251754000  |              |   |              |              |              |   |             |              |              |                                                                                                                                                                                                                                                                                                                        |             |              |              |             |              |              |              |             |              |              |              |   |              |              |              |   |              |              |              |   |             |              |              |   |             |              |              |   |              |              |             |   |              |              |              |                                                                                                                                                                                                                                                                                                                                                                                                                                                                                                                                                                                                                                                                                                                                                                                                                                                                                                                                                                                                                                                                                                                                                                                                                                      |   |             |              |              |   |              |             |              |   |              |             |              |   |              |              |              |   |             |              |             |   |              |              |              |   |             |              |              |   |              |             |              |   |              |             |              |   |              |              |              |   |              |              |             |   |              |              |              |
| H                                                                                                                                                                                                                                                                                                                                                                                                                                                                                                                                                                                                                                                                                                                                                                                                                                                                                                                                                                                                                                                                                                                                                                  | 1.482139000  | 0.000000000  | -1.782197000 |              |   |              |              |              |   |             |              |              |                                                                                                                                                                                                                                                                                                                        |             |              |              |             |              |              |              |             |              |              |              |   |              |              |              |   |              |              |              |   |             |              |              |   |             |              |              |   |              |              |             |   |              |              |              |                                                                                                                                                                                                                                                                                                                                                                                                                                                                                                                                                                                                                                                                                                                                                                                                                                                                                                                                                                                                                                                                                                                                                                                                                                      |   |             |              |              |   |              |             |              |   |              |             |              |   |              |              |              |   |             |              |             |   |              |              |              |   |             |              |              |   |              |             |              |   |              |             |              |   |              |              |              |   |              |              |             |   |              |              |              |
| H                                                                                                                                                                                                                                                                                                                                                                                                                                                                                                                                                                                                                                                                                                                                                                                                                                                                                                                                                                                                                                                                                                                                                                  | -1.482139000 | 0.000000000  | -1.782197000 |              |   |              |              |              |   |             |              |              |                                                                                                                                                                                                                                                                                                                        |             |              |              |             |              |              |              |             |              |              |              |   |              |              |              |   |              |              |              |   |             |              |              |   |             |              |              |   |              |              |             |   |              |              |              |                                                                                                                                                                                                                                                                                                                                                                                                                                                                                                                                                                                                                                                                                                                                                                                                                                                                                                                                                                                                                                                                                                                                                                                                                                      |   |             |              |              |   |              |             |              |   |              |             |              |   |              |              |              |   |             |              |             |   |              |              |              |   |             |              |              |   |              |             |              |   |              |             |              |   |              |              |              |   |              |              |             |   |              |              |              |
| H                                                                                                                                                                                                                                                                                                                                                                                                                                                                                                                                                                                                                                                                                                                                                                                                                                                                                                                                                                                                                                                                                                                                                                  | 0.000000000  | 2.105997000  | -0.537881000 |              |   |              |              |              |   |             |              |              |                                                                                                                                                                                                                                                                                                                        |             |              |              |             |              |              |              |             |              |              |              |   |              |              |              |   |              |              |              |   |             |              |              |   |             |              |              |   |              |              |             |   |              |              |              |                                                                                                                                                                                                                                                                                                                                                                                                                                                                                                                                                                                                                                                                                                                                                                                                                                                                                                                                                                                                                                                                                                                                                                                                                                      |   |             |              |              |   |              |             |              |   |              |             |              |   |              |              |              |   |             |              |             |   |              |              |              |   |             |              |              |   |              |             |              |   |              |             |              |   |              |              |              |   |              |              |             |   |              |              |              |
| H                                                                                                                                                                                                                                                                                                                                                                                                                                                                                                                                                                                                                                                                                                                                                                                                                                                                                                                                                                                                                                                                                                                                                                  | 0.000000000  | -2.105997000 | -0.537881000 |              |   |              |              |              |   |             |              |              |                                                                                                                                                                                                                                                                                                                        |             |              |              |             |              |              |              |             |              |              |              |   |              |              |              |   |              |              |              |   |             |              |              |   |             |              |              |   |              |              |             |   |              |              |              |                                                                                                                                                                                                                                                                                                                                                                                                                                                                                                                                                                                                                                                                                                                                                                                                                                                                                                                                                                                                                                                                                                                                                                                                                                      |   |             |              |              |   |              |             |              |   |              |             |              |   |              |              |              |   |             |              |             |   |              |              |              |   |             |              |              |   |              |             |              |   |              |             |              |   |              |              |              |   |              |              |             |   |              |              |              |
| H                                                                                                                                                                                                                                                                                                                                                                                                                                                                                                                                                                                                                                                                                                                                                                                                                                                                                                                                                                                                                                                                                                                                                                  | 0.000000000  | 1.347232000  | 2.092641000  |              |   |              |              |              |   |             |              |              |                                                                                                                                                                                                                                                                                                                        |             |              |              |             |              |              |              |             |              |              |              |   |              |              |              |   |              |              |              |   |             |              |              |   |             |              |              |   |              |              |             |   |              |              |              |                                                                                                                                                                                                                                                                                                                                                                                                                                                                                                                                                                                                                                                                                                                                                                                                                                                                                                                                                                                                                                                                                                                                                                                                                                      |   |             |              |              |   |              |             |              |   |              |             |              |   |              |              |              |   |             |              |             |   |              |              |              |   |             |              |              |   |              |             |              |   |              |             |              |   |              |              |              |   |              |              |             |   |              |              |              |
| H                                                                                                                                                                                                                                                                                                                                                                                                                                                                                                                                                                                                                                                                                                                                                                                                                                                                                                                                                                                                                                                                                                                                                                  | 0.000000000  | -1.347232000 | 2.092641000  |              |   |              |              |              |   |             |              |              |                                                                                                                                                                                                                                                                                                                        |             |              |              |             |              |              |              |             |              |              |              |   |              |              |              |   |              |              |              |   |             |              |              |   |             |              |              |   |              |              |             |   |              |              |              |                                                                                                                                                                                                                                                                                                                                                                                                                                                                                                                                                                                                                                                                                                                                                                                                                                                                                                                                                                                                                                                                                                                                                                                                                                      |   |             |              |              |   |              |             |              |   |              |             |              |   |              |              |              |   |             |              |             |   |              |              |              |   |             |              |              |   |              |             |              |   |              |             |              |   |              |              |              |   |              |              |             |   |              |              |              |
| <p><b>5 (Benzvalene in the T<sub>1</sub> state - conformer 1)</b></p> <p>E : -232.078530858 a.u.</p> <table border="1"> <tbody> <tr><td>C</td><td>-0.729612000</td><td>-0.965909000</td><td>0.000000000</td></tr> <tr><td>C</td><td>0.715704000</td><td>-1.001633000</td><td>0.000000000</td></tr> <tr><td>C</td><td>0.044302000</td><td>-0.198204000</td><td>1.100249000</td></tr> <tr><td>C</td><td>0.044302000</td><td>-0.198204000</td><td>-1.100249000</td></tr> <tr><td>C</td><td>0.044302000</td><td>1.234380000</td><td>0.768278000</td></tr> <tr><td>C</td><td>0.044302000</td><td>1.234380000</td><td>-0.768278000</td></tr> <tr><td>H</td><td>-1.564063000</td><td>-1.647769000</td><td>0.000000000</td></tr> <tr><td>H</td><td>1.468299000</td><td>-1.773460000</td><td>0.000000000</td></tr> <tr><td>H</td><td>0.027981000</td><td>-0.582509000</td><td>2.112134000</td></tr> <tr><td>H</td><td>0.027981000</td><td>-0.582509000</td><td>-2.112134000</td></tr> <tr><td>H</td><td>-0.470005000</td><td>1.978691000</td><td>1.366220000</td></tr> <tr><td>H</td><td>-0.470005000</td><td>1.978691000</td><td>-1.366220000</td></tr> </tbody> </table>  | C            | -0.729612000 | -0.965909000 | 0.000000000  | C | 0.715704000  | -1.001633000 | 0.000000000  | C | 0.044302000 | -0.198204000 | 1.100249000  | C                                                                                                                                                                                                                                                                                                                      | 0.044302000 | -0.198204000 | -1.100249000 | C           | 0.044302000  | 1.234380000  | 0.768278000  | C           | 0.044302000  | 1.234380000  | -0.768278000 | H | -1.564063000 | -1.647769000 | 0.000000000  | H | 1.468299000  | -1.773460000 | 0.000000000  | H | 0.027981000 | -0.582509000 | 2.112134000  | H | 0.027981000 | -0.582509000 | -2.112134000 | H | -0.470005000 | 1.978691000  | 1.366220000 | H | -0.470005000 | 1.978691000  | -1.366220000 | <p><b>6 (TS Benzvalene conf. 1 to conf. 2 in the T<sub>1</sub> state)</b></p> <p>E : -232.075194849 a.u.</p> <table border="1"> <tbody> <tr><td>C</td><td>0.038251000</td><td>-0.722492000</td><td>-1.046256000</td></tr> <tr><td>C</td><td>-0.052113000</td><td>0.714976000</td><td>-0.954612000</td></tr> <tr><td>C</td><td>1.094721000</td><td>0.004993000</td><td>-0.209536000</td></tr> <tr><td>C</td><td>-1.097997000</td><td>-0.154917000</td><td>-0.215775000</td></tr> <tr><td>C</td><td>0.759920000</td><td>-0.118009000</td><td>1.210571000</td></tr> <tr><td>C</td><td>-0.770137000</td><td>-0.160588000</td><td>1.221827000</td></tr> <tr><td>H</td><td>0.094558000</td><td>-1.453582000</td><td>-1.836339000</td></tr> <tr><td>H</td><td>-0.119475000</td><td>1.570551000</td><td>-1.606192000</td></tr> <tr><td>H</td><td>2.103974000</td><td>0.091916000</td><td>-0.591360000</td></tr> <tr><td>H</td><td>-2.109857000</td><td>-0.181656000</td><td>-0.599946000</td></tr> <tr><td>H</td><td>1.420145000</td><td>-0.008613000</td><td>2.056198000</td></tr> <tr><td>H</td><td>-1.361991000</td><td>0.417420000</td><td>1.928286000</td></tr> </tbody> </table> <p>Imaginary frequency: 332i cm<sup>-1</sup></p>      | C | 0.038251000 | -0.722492000 | -1.046256000 | C | -0.052113000 | 0.714976000 | -0.954612000 | C | 1.094721000  | 0.004993000 | -0.209536000 | C | -1.097997000 | -0.154917000 | -0.215775000 | C | 0.759920000 | -0.118009000 | 1.210571000 | C | -0.770137000 | -0.160588000 | 1.221827000  | H | 0.094558000 | -1.453582000 | -1.836339000 | H | -0.119475000 | 1.570551000 | -1.606192000 | H | 2.103974000  | 0.091916000 | -0.591360000 | H | -2.109857000 | -0.181656000 | -0.599946000 | H | 1.420145000  | -0.008613000 | 2.056198000 | H | -1.361991000 | 0.417420000  | 1.928286000  |
| C                                                                                                                                                                                                                                                                                                                                                                                                                                                                                                                                                                                                                                                                                                                                                                                                                                                                                                                                                                                                                                                                                                                                                                  | -0.729612000 | -0.965909000 | 0.000000000  |              |   |              |              |              |   |             |              |              |                                                                                                                                                                                                                                                                                                                        |             |              |              |             |              |              |              |             |              |              |              |   |              |              |              |   |              |              |              |   |             |              |              |   |             |              |              |   |              |              |             |   |              |              |              |                                                                                                                                                                                                                                                                                                                                                                                                                                                                                                                                                                                                                                                                                                                                                                                                                                                                                                                                                                                                                                                                                                                                                                                                                                      |   |             |              |              |   |              |             |              |   |              |             |              |   |              |              |              |   |             |              |             |   |              |              |              |   |             |              |              |   |              |             |              |   |              |             |              |   |              |              |              |   |              |              |             |   |              |              |              |
| C                                                                                                                                                                                                                                                                                                                                                                                                                                                                                                                                                                                                                                                                                                                                                                                                                                                                                                                                                                                                                                                                                                                                                                  | 0.715704000  | -1.001633000 | 0.000000000  |              |   |              |              |              |   |             |              |              |                                                                                                                                                                                                                                                                                                                        |             |              |              |             |              |              |              |             |              |              |              |   |              |              |              |   |              |              |              |   |             |              |              |   |             |              |              |   |              |              |             |   |              |              |              |                                                                                                                                                                                                                                                                                                                                                                                                                                                                                                                                                                                                                                                                                                                                                                                                                                                                                                                                                                                                                                                                                                                                                                                                                                      |   |             |              |              |   |              |             |              |   |              |             |              |   |              |              |              |   |             |              |             |   |              |              |              |   |             |              |              |   |              |             |              |   |              |             |              |   |              |              |              |   |              |              |             |   |              |              |              |
| C                                                                                                                                                                                                                                                                                                                                                                                                                                                                                                                                                                                                                                                                                                                                                                                                                                                                                                                                                                                                                                                                                                                                                                  | 0.044302000  | -0.198204000 | 1.100249000  |              |   |              |              |              |   |             |              |              |                                                                                                                                                                                                                                                                                                                        |             |              |              |             |              |              |              |             |              |              |              |   |              |              |              |   |              |              |              |   |             |              |              |   |             |              |              |   |              |              |             |   |              |              |              |                                                                                                                                                                                                                                                                                                                                                                                                                                                                                                                                                                                                                                                                                                                                                                                                                                                                                                                                                                                                                                                                                                                                                                                                                                      |   |             |              |              |   |              |             |              |   |              |             |              |   |              |              |              |   |             |              |             |   |              |              |              |   |             |              |              |   |              |             |              |   |              |             |              |   |              |              |              |   |              |              |             |   |              |              |              |
| C                                                                                                                                                                                                                                                                                                                                                                                                                                                                                                                                                                                                                                                                                                                                                                                                                                                                                                                                                                                                                                                                                                                                                                  | 0.044302000  | -0.198204000 | -1.100249000 |              |   |              |              |              |   |             |              |              |                                                                                                                                                                                                                                                                                                                        |             |              |              |             |              |              |              |             |              |              |              |   |              |              |              |   |              |              |              |   |             |              |              |   |             |              |              |   |              |              |             |   |              |              |              |                                                                                                                                                                                                                                                                                                                                                                                                                                                                                                                                                                                                                                                                                                                                                                                                                                                                                                                                                                                                                                                                                                                                                                                                                                      |   |             |              |              |   |              |             |              |   |              |             |              |   |              |              |              |   |             |              |             |   |              |              |              |   |             |              |              |   |              |             |              |   |              |             |              |   |              |              |              |   |              |              |             |   |              |              |              |
| C                                                                                                                                                                                                                                                                                                                                                                                                                                                                                                                                                                                                                                                                                                                                                                                                                                                                                                                                                                                                                                                                                                                                                                  | 0.044302000  | 1.234380000  | 0.768278000  |              |   |              |              |              |   |             |              |              |                                                                                                                                                                                                                                                                                                                        |             |              |              |             |              |              |              |             |              |              |              |   |              |              |              |   |              |              |              |   |             |              |              |   |             |              |              |   |              |              |             |   |              |              |              |                                                                                                                                                                                                                                                                                                                                                                                                                                                                                                                                                                                                                                                                                                                                                                                                                                                                                                                                                                                                                                                                                                                                                                                                                                      |   |             |              |              |   |              |             |              |   |              |             |              |   |              |              |              |   |             |              |             |   |              |              |              |   |             |              |              |   |              |             |              |   |              |             |              |   |              |              |              |   |              |              |             |   |              |              |              |
| C                                                                                                                                                                                                                                                                                                                                                                                                                                                                                                                                                                                                                                                                                                                                                                                                                                                                                                                                                                                                                                                                                                                                                                  | 0.044302000  | 1.234380000  | -0.768278000 |              |   |              |              |              |   |             |              |              |                                                                                                                                                                                                                                                                                                                        |             |              |              |             |              |              |              |             |              |              |              |   |              |              |              |   |              |              |              |   |             |              |              |   |             |              |              |   |              |              |             |   |              |              |              |                                                                                                                                                                                                                                                                                                                                                                                                                                                                                                                                                                                                                                                                                                                                                                                                                                                                                                                                                                                                                                                                                                                                                                                                                                      |   |             |              |              |   |              |             |              |   |              |             |              |   |              |              |              |   |             |              |             |   |              |              |              |   |             |              |              |   |              |             |              |   |              |             |              |   |              |              |              |   |              |              |             |   |              |              |              |
| H                                                                                                                                                                                                                                                                                                                                                                                                                                                                                                                                                                                                                                                                                                                                                                                                                                                                                                                                                                                                                                                                                                                                                                  | -1.564063000 | -1.647769000 | 0.000000000  |              |   |              |              |              |   |             |              |              |                                                                                                                                                                                                                                                                                                                        |             |              |              |             |              |              |              |             |              |              |              |   |              |              |              |   |              |              |              |   |             |              |              |   |             |              |              |   |              |              |             |   |              |              |              |                                                                                                                                                                                                                                                                                                                                                                                                                                                                                                                                                                                                                                                                                                                                                                                                                                                                                                                                                                                                                                                                                                                                                                                                                                      |   |             |              |              |   |              |             |              |   |              |             |              |   |              |              |              |   |             |              |             |   |              |              |              |   |             |              |              |   |              |             |              |   |              |             |              |   |              |              |              |   |              |              |             |   |              |              |              |
| H                                                                                                                                                                                                                                                                                                                                                                                                                                                                                                                                                                                                                                                                                                                                                                                                                                                                                                                                                                                                                                                                                                                                                                  | 1.468299000  | -1.773460000 | 0.000000000  |              |   |              |              |              |   |             |              |              |                                                                                                                                                                                                                                                                                                                        |             |              |              |             |              |              |              |             |              |              |              |   |              |              |              |   |              |              |              |   |             |              |              |   |             |              |              |   |              |              |             |   |              |              |              |                                                                                                                                                                                                                                                                                                                                                                                                                                                                                                                                                                                                                                                                                                                                                                                                                                                                                                                                                                                                                                                                                                                                                                                                                                      |   |             |              |              |   |              |             |              |   |              |             |              |   |              |              |              |   |             |              |             |   |              |              |              |   |             |              |              |   |              |             |              |   |              |             |              |   |              |              |              |   |              |              |             |   |              |              |              |
| H                                                                                                                                                                                                                                                                                                                                                                                                                                                                                                                                                                                                                                                                                                                                                                                                                                                                                                                                                                                                                                                                                                                                                                  | 0.027981000  | -0.582509000 | 2.112134000  |              |   |              |              |              |   |             |              |              |                                                                                                                                                                                                                                                                                                                        |             |              |              |             |              |              |              |             |              |              |              |   |              |              |              |   |              |              |              |   |             |              |              |   |             |              |              |   |              |              |             |   |              |              |              |                                                                                                                                                                                                                                                                                                                                                                                                                                                                                                                                                                                                                                                                                                                                                                                                                                                                                                                                                                                                                                                                                                                                                                                                                                      |   |             |              |              |   |              |             |              |   |              |             |              |   |              |              |              |   |             |              |             |   |              |              |              |   |             |              |              |   |              |             |              |   |              |             |              |   |              |              |              |   |              |              |             |   |              |              |              |
| H                                                                                                                                                                                                                                                                                                                                                                                                                                                                                                                                                                                                                                                                                                                                                                                                                                                                                                                                                                                                                                                                                                                                                                  | 0.027981000  | -0.582509000 | -2.112134000 |              |   |              |              |              |   |             |              |              |                                                                                                                                                                                                                                                                                                                        |             |              |              |             |              |              |              |             |              |              |              |   |              |              |              |   |              |              |              |   |             |              |              |   |             |              |              |   |              |              |             |   |              |              |              |                                                                                                                                                                                                                                                                                                                                                                                                                                                                                                                                                                                                                                                                                                                                                                                                                                                                                                                                                                                                                                                                                                                                                                                                                                      |   |             |              |              |   |              |             |              |   |              |             |              |   |              |              |              |   |             |              |             |   |              |              |              |   |             |              |              |   |              |             |              |   |              |             |              |   |              |              |              |   |              |              |             |   |              |              |              |
| H                                                                                                                                                                                                                                                                                                                                                                                                                                                                                                                                                                                                                                                                                                                                                                                                                                                                                                                                                                                                                                                                                                                                                                  | -0.470005000 | 1.978691000  | 1.366220000  |              |   |              |              |              |   |             |              |              |                                                                                                                                                                                                                                                                                                                        |             |              |              |             |              |              |              |             |              |              |              |   |              |              |              |   |              |              |              |   |             |              |              |   |             |              |              |   |              |              |             |   |              |              |              |                                                                                                                                                                                                                                                                                                                                                                                                                                                                                                                                                                                                                                                                                                                                                                                                                                                                                                                                                                                                                                                                                                                                                                                                                                      |   |             |              |              |   |              |             |              |   |              |             |              |   |              |              |              |   |             |              |             |   |              |              |              |   |             |              |              |   |              |             |              |   |              |             |              |   |              |              |              |   |              |              |             |   |              |              |              |
| H                                                                                                                                                                                                                                                                                                                                                                                                                                                                                                                                                                                                                                                                                                                                                                                                                                                                                                                                                                                                                                                                                                                                                                  | -0.470005000 | 1.978691000  | -1.366220000 |              |   |              |              |              |   |             |              |              |                                                                                                                                                                                                                                                                                                                        |             |              |              |             |              |              |              |             |              |              |              |   |              |              |              |   |              |              |              |   |             |              |              |   |             |              |              |   |              |              |             |   |              |              |              |                                                                                                                                                                                                                                                                                                                                                                                                                                                                                                                                                                                                                                                                                                                                                                                                                                                                                                                                                                                                                                                                                                                                                                                                                                      |   |             |              |              |   |              |             |              |   |              |             |              |   |              |              |              |   |             |              |             |   |              |              |              |   |             |              |              |   |              |             |              |   |              |             |              |   |              |              |              |   |              |              |             |   |              |              |              |
| C                                                                                                                                                                                                                                                                                                                                                                                                                                                                                                                                                                                                                                                                                                                                                                                                                                                                                                                                                                                                                                                                                                                                                                  | 0.038251000  | -0.722492000 | -1.046256000 |              |   |              |              |              |   |             |              |              |                                                                                                                                                                                                                                                                                                                        |             |              |              |             |              |              |              |             |              |              |              |   |              |              |              |   |              |              |              |   |             |              |              |   |             |              |              |   |              |              |             |   |              |              |              |                                                                                                                                                                                                                                                                                                                                                                                                                                                                                                                                                                                                                                                                                                                                                                                                                                                                                                                                                                                                                                                                                                                                                                                                                                      |   |             |              |              |   |              |             |              |   |              |             |              |   |              |              |              |   |             |              |             |   |              |              |              |   |             |              |              |   |              |             |              |   |              |             |              |   |              |              |              |   |              |              |             |   |              |              |              |
| C                                                                                                                                                                                                                                                                                                                                                                                                                                                                                                                                                                                                                                                                                                                                                                                                                                                                                                                                                                                                                                                                                                                                                                  | -0.052113000 | 0.714976000  | -0.954612000 |              |   |              |              |              |   |             |              |              |                                                                                                                                                                                                                                                                                                                        |             |              |              |             |              |              |              |             |              |              |              |   |              |              |              |   |              |              |              |   |             |              |              |   |             |              |              |   |              |              |             |   |              |              |              |                                                                                                                                                                                                                                                                                                                                                                                                                                                                                                                                                                                                                                                                                                                                                                                                                                                                                                                                                                                                                                                                                                                                                                                                                                      |   |             |              |              |   |              |             |              |   |              |             |              |   |              |              |              |   |             |              |             |   |              |              |              |   |             |              |              |   |              |             |              |   |              |             |              |   |              |              |              |   |              |              |             |   |              |              |              |
| C                                                                                                                                                                                                                                                                                                                                                                                                                                                                                                                                                                                                                                                                                                                                                                                                                                                                                                                                                                                                                                                                                                                                                                  | 1.094721000  | 0.004993000  | -0.209536000 |              |   |              |              |              |   |             |              |              |                                                                                                                                                                                                                                                                                                                        |             |              |              |             |              |              |              |             |              |              |              |   |              |              |              |   |              |              |              |   |             |              |              |   |             |              |              |   |              |              |             |   |              |              |              |                                                                                                                                                                                                                                                                                                                                                                                                                                                                                                                                                                                                                                                                                                                                                                                                                                                                                                                                                                                                                                                                                                                                                                                                                                      |   |             |              |              |   |              |             |              |   |              |             |              |   |              |              |              |   |             |              |             |   |              |              |              |   |             |              |              |   |              |             |              |   |              |             |              |   |              |              |              |   |              |              |             |   |              |              |              |
| C                                                                                                                                                                                                                                                                                                                                                                                                                                                                                                                                                                                                                                                                                                                                                                                                                                                                                                                                                                                                                                                                                                                                                                  | -1.097997000 | -0.154917000 | -0.215775000 |              |   |              |              |              |   |             |              |              |                                                                                                                                                                                                                                                                                                                        |             |              |              |             |              |              |              |             |              |              |              |   |              |              |              |   |              |              |              |   |             |              |              |   |             |              |              |   |              |              |             |   |              |              |              |                                                                                                                                                                                                                                                                                                                                                                                                                                                                                                                                                                                                                                                                                                                                                                                                                                                                                                                                                                                                                                                                                                                                                                                                                                      |   |             |              |              |   |              |             |              |   |              |             |              |   |              |              |              |   |             |              |             |   |              |              |              |   |             |              |              |   |              |             |              |   |              |             |              |   |              |              |              |   |              |              |             |   |              |              |              |
| C                                                                                                                                                                                                                                                                                                                                                                                                                                                                                                                                                                                                                                                                                                                                                                                                                                                                                                                                                                                                                                                                                                                                                                  | 0.759920000  | -0.118009000 | 1.210571000  |              |   |              |              |              |   |             |              |              |                                                                                                                                                                                                                                                                                                                        |             |              |              |             |              |              |              |             |              |              |              |   |              |              |              |   |              |              |              |   |             |              |              |   |             |              |              |   |              |              |             |   |              |              |              |                                                                                                                                                                                                                                                                                                                                                                                                                                                                                                                                                                                                                                                                                                                                                                                                                                                                                                                                                                                                                                                                                                                                                                                                                                      |   |             |              |              |   |              |             |              |   |              |             |              |   |              |              |              |   |             |              |             |   |              |              |              |   |             |              |              |   |              |             |              |   |              |             |              |   |              |              |              |   |              |              |             |   |              |              |              |
| C                                                                                                                                                                                                                                                                                                                                                                                                                                                                                                                                                                                                                                                                                                                                                                                                                                                                                                                                                                                                                                                                                                                                                                  | -0.770137000 | -0.160588000 | 1.221827000  |              |   |              |              |              |   |             |              |              |                                                                                                                                                                                                                                                                                                                        |             |              |              |             |              |              |              |             |              |              |              |   |              |              |              |   |              |              |              |   |             |              |              |   |             |              |              |   |              |              |             |   |              |              |              |                                                                                                                                                                                                                                                                                                                                                                                                                                                                                                                                                                                                                                                                                                                                                                                                                                                                                                                                                                                                                                                                                                                                                                                                                                      |   |             |              |              |   |              |             |              |   |              |             |              |   |              |              |              |   |             |              |             |   |              |              |              |   |             |              |              |   |              |             |              |   |              |             |              |   |              |              |              |   |              |              |             |   |              |              |              |
| H                                                                                                                                                                                                                                                                                                                                                                                                                                                                                                                                                                                                                                                                                                                                                                                                                                                                                                                                                                                                                                                                                                                                                                  | 0.094558000  | -1.453582000 | -1.836339000 |              |   |              |              |              |   |             |              |              |                                                                                                                                                                                                                                                                                                                        |             |              |              |             |              |              |              |             |              |              |              |   |              |              |              |   |              |              |              |   |             |              |              |   |             |              |              |   |              |              |             |   |              |              |              |                                                                                                                                                                                                                                                                                                                                                                                                                                                                                                                                                                                                                                                                                                                                                                                                                                                                                                                                                                                                                                                                                                                                                                                                                                      |   |             |              |              |   |              |             |              |   |              |             |              |   |              |              |              |   |             |              |             |   |              |              |              |   |             |              |              |   |              |             |              |   |              |             |              |   |              |              |              |   |              |              |             |   |              |              |              |
| H                                                                                                                                                                                                                                                                                                                                                                                                                                                                                                                                                                                                                                                                                                                                                                                                                                                                                                                                                                                                                                                                                                                                                                  | -0.119475000 | 1.570551000  | -1.606192000 |              |   |              |              |              |   |             |              |              |                                                                                                                                                                                                                                                                                                                        |             |              |              |             |              |              |              |             |              |              |              |   |              |              |              |   |              |              |              |   |             |              |              |   |             |              |              |   |              |              |             |   |              |              |              |                                                                                                                                                                                                                                                                                                                                                                                                                                                                                                                                                                                                                                                                                                                                                                                                                                                                                                                                                                                                                                                                                                                                                                                                                                      |   |             |              |              |   |              |             |              |   |              |             |              |   |              |              |              |   |             |              |             |   |              |              |              |   |             |              |              |   |              |             |              |   |              |             |              |   |              |              |              |   |              |              |             |   |              |              |              |
| H                                                                                                                                                                                                                                                                                                                                                                                                                                                                                                                                                                                                                                                                                                                                                                                                                                                                                                                                                                                                                                                                                                                                                                  | 2.103974000  | 0.091916000  | -0.591360000 |              |   |              |              |              |   |             |              |              |                                                                                                                                                                                                                                                                                                                        |             |              |              |             |              |              |              |             |              |              |              |   |              |              |              |   |              |              |              |   |             |              |              |   |             |              |              |   |              |              |             |   |              |              |              |                                                                                                                                                                                                                                                                                                                                                                                                                                                                                                                                                                                                                                                                                                                                                                                                                                                                                                                                                                                                                                                                                                                                                                                                                                      |   |             |              |              |   |              |             |              |   |              |             |              |   |              |              |              |   |             |              |             |   |              |              |              |   |             |              |              |   |              |             |              |   |              |             |              |   |              |              |              |   |              |              |             |   |              |              |              |
| H                                                                                                                                                                                                                                                                                                                                                                                                                                                                                                                                                                                                                                                                                                                                                                                                                                                                                                                                                                                                                                                                                                                                                                  | -2.109857000 | -0.181656000 | -0.599946000 |              |   |              |              |              |   |             |              |              |                                                                                                                                                                                                                                                                                                                        |             |              |              |             |              |              |              |             |              |              |              |   |              |              |              |   |              |              |              |   |             |              |              |   |             |              |              |   |              |              |             |   |              |              |              |                                                                                                                                                                                                                                                                                                                                                                                                                                                                                                                                                                                                                                                                                                                                                                                                                                                                                                                                                                                                                                                                                                                                                                                                                                      |   |             |              |              |   |              |             |              |   |              |             |              |   |              |              |              |   |             |              |             |   |              |              |              |   |             |              |              |   |              |             |              |   |              |             |              |   |              |              |              |   |              |              |             |   |              |              |              |
| H                                                                                                                                                                                                                                                                                                                                                                                                                                                                                                                                                                                                                                                                                                                                                                                                                                                                                                                                                                                                                                                                                                                                                                  | 1.420145000  | -0.008613000 | 2.056198000  |              |   |              |              |              |   |             |              |              |                                                                                                                                                                                                                                                                                                                        |             |              |              |             |              |              |              |             |              |              |              |   |              |              |              |   |              |              |              |   |             |              |              |   |             |              |              |   |              |              |             |   |              |              |              |                                                                                                                                                                                                                                                                                                                                                                                                                                                                                                                                                                                                                                                                                                                                                                                                                                                                                                                                                                                                                                                                                                                                                                                                                                      |   |             |              |              |   |              |             |              |   |              |             |              |   |              |              |              |   |             |              |             |   |              |              |              |   |             |              |              |   |              |             |              |   |              |             |              |   |              |              |              |   |              |              |             |   |              |              |              |
| H                                                                                                                                                                                                                                                                                                                                                                                                                                                                                                                                                                                                                                                                                                                                                                                                                                                                                                                                                                                                                                                                                                                                                                  | -1.361991000 | 0.417420000  | 1.928286000  |              |   |              |              |              |   |             |              |              |                                                                                                                                                                                                                                                                                                                        |             |              |              |             |              |              |              |             |              |              |              |   |              |              |              |   |              |              |              |   |             |              |              |   |             |              |              |   |              |              |             |   |              |              |              |                                                                                                                                                                                                                                                                                                                                                                                                                                                                                                                                                                                                                                                                                                                                                                                                                                                                                                                                                                                                                                                                                                                                                                                                                                      |   |             |              |              |   |              |             |              |   |              |             |              |   |              |              |              |   |             |              |             |   |              |              |              |   |             |              |              |   |              |             |              |   |              |             |              |   |              |              |              |   |              |              |             |   |              |              |              |
| <p><b>7 (Benzvalene in the T<sub>1</sub> state - conformer 2)</b></p> <p>E : -232.080902301 a.u.</p> <table border="1"> <tbody> <tr><td>C</td><td>0.003326000</td><td>0.722534000</td><td>0.967125000</td></tr> <tr><td>C</td><td>-0.003615000</td><td>-0.722578000</td><td>0.967084000</td></tr> <tr><td>C</td><td>1.097619000</td><td>-0.033469000</td><td>0.178949000</td></tr> </tbody> </table>                                                                                                                                                                                                                                                                                                                                                                                                                                                                                                                                                                                                                                                                                                                                                               | C            | 0.003326000  | 0.722534000  | 0.967125000  | C | -0.003615000 | -0.722578000 | 0.967084000  | C | 1.097619000 | -0.033469000 | 0.178949000  | <p><b>8 (TS Benzvalene to prefulvene in the T<sub>1</sub> state)</b></p> <p>E : -232.073965923 a.u.</p> <table border="1"> <tbody> <tr><td>C</td><td>-0.130598000</td><td>0.746684000</td><td>1.045041000</td></tr> <tr><td>C</td><td>0.060593000</td><td>-0.673130000</td><td>1.003091000</td></tr> </tbody> </table> | C           | -0.130598000 | 0.746684000  | 1.045041000 | C            | 0.060593000  | -0.673130000 | 1.003091000 |              |              |              |   |              |              |              |   |              |              |              |   |             |              |              |   |             |              |              |   |              |              |             |   |              |              |              |                                                                                                                                                                                                                                                                                                                                                                                                                                                                                                                                                                                                                                                                                                                                                                                                                                                                                                                                                                                                                                                                                                                                                                                                                                      |   |             |              |              |   |              |             |              |   |              |             |              |   |              |              |              |   |             |              |             |   |              |              |              |   |             |              |              |   |              |             |              |   |              |             |              |   |              |              |              |   |              |              |             |   |              |              |              |
| C                                                                                                                                                                                                                                                                                                                                                                                                                                                                                                                                                                                                                                                                                                                                                                                                                                                                                                                                                                                                                                                                                                                                                                  | 0.003326000  | 0.722534000  | 0.967125000  |              |   |              |              |              |   |             |              |              |                                                                                                                                                                                                                                                                                                                        |             |              |              |             |              |              |              |             |              |              |              |   |              |              |              |   |              |              |              |   |             |              |              |   |             |              |              |   |              |              |             |   |              |              |              |                                                                                                                                                                                                                                                                                                                                                                                                                                                                                                                                                                                                                                                                                                                                                                                                                                                                                                                                                                                                                                                                                                                                                                                                                                      |   |             |              |              |   |              |             |              |   |              |             |              |   |              |              |              |   |             |              |             |   |              |              |              |   |             |              |              |   |              |             |              |   |              |             |              |   |              |              |              |   |              |              |             |   |              |              |              |
| C                                                                                                                                                                                                                                                                                                                                                                                                                                                                                                                                                                                                                                                                                                                                                                                                                                                                                                                                                                                                                                                                                                                                                                  | -0.003615000 | -0.722578000 | 0.967084000  |              |   |              |              |              |   |             |              |              |                                                                                                                                                                                                                                                                                                                        |             |              |              |             |              |              |              |             |              |              |              |   |              |              |              |   |              |              |              |   |             |              |              |   |             |              |              |   |              |              |             |   |              |              |              |                                                                                                                                                                                                                                                                                                                                                                                                                                                                                                                                                                                                                                                                                                                                                                                                                                                                                                                                                                                                                                                                                                                                                                                                                                      |   |             |              |              |   |              |             |              |   |              |             |              |   |              |              |              |   |             |              |             |   |              |              |              |   |             |              |              |   |              |             |              |   |              |             |              |   |              |              |              |   |              |              |             |   |              |              |              |
| C                                                                                                                                                                                                                                                                                                                                                                                                                                                                                                                                                                                                                                                                                                                                                                                                                                                                                                                                                                                                                                                                                                                                                                  | 1.097619000  | -0.033469000 | 0.178949000  |              |   |              |              |              |   |             |              |              |                                                                                                                                                                                                                                                                                                                        |             |              |              |             |              |              |              |             |              |              |              |   |              |              |              |   |              |              |              |   |             |              |              |   |             |              |              |   |              |              |             |   |              |              |              |                                                                                                                                                                                                                                                                                                                                                                                                                                                                                                                                                                                                                                                                                                                                                                                                                                                                                                                                                                                                                                                                                                                                                                                                                                      |   |             |              |              |   |              |             |              |   |              |             |              |   |              |              |              |   |             |              |             |   |              |              |              |   |             |              |              |   |              |             |              |   |              |             |              |   |              |              |              |   |              |              |             |   |              |              |              |
| C                                                                                                                                                                                                                                                                                                                                                                                                                                                                                                                                                                                                                                                                                                                                                                                                                                                                                                                                                                                                                                                                                                                                                                  | -0.130598000 | 0.746684000  | 1.045041000  |              |   |              |              |              |   |             |              |              |                                                                                                                                                                                                                                                                                                                        |             |              |              |             |              |              |              |             |              |              |              |   |              |              |              |   |              |              |              |   |             |              |              |   |             |              |              |   |              |              |             |   |              |              |              |                                                                                                                                                                                                                                                                                                                                                                                                                                                                                                                                                                                                                                                                                                                                                                                                                                                                                                                                                                                                                                                                                                                                                                                                                                      |   |             |              |              |   |              |             |              |   |              |             |              |   |              |              |              |   |             |              |             |   |              |              |              |   |             |              |              |   |              |             |              |   |              |             |              |   |              |              |              |   |              |              |             |   |              |              |              |
| C                                                                                                                                                                                                                                                                                                                                                                                                                                                                                                                                                                                                                                                                                                                                                                                                                                                                                                                                                                                                                                                                                                                                                                  | 0.060593000  | -0.673130000 | 1.003091000  |              |   |              |              |              |   |             |              |              |                                                                                                                                                                                                                                                                                                                        |             |              |              |             |              |              |              |             |              |              |              |   |              |              |              |   |              |              |              |   |             |              |              |   |             |              |              |   |              |              |             |   |              |              |              |                                                                                                                                                                                                                                                                                                                                                                                                                                                                                                                                                                                                                                                                                                                                                                                                                                                                                                                                                                                                                                                                                                                                                                                                                                      |   |             |              |              |   |              |             |              |   |              |             |              |   |              |              |              |   |             |              |             |   |              |              |              |   |             |              |              |   |              |             |              |   |              |             |              |   |              |              |              |   |              |              |             |   |              |              |              |

|                                                                                                                                                                                                                                                                                                                                                                                                                                                                                                                                                                                                                          |                                                                                                                                                                                                                                                                                                                                                                                                                                                                                                                                                                                                                                  |
|--------------------------------------------------------------------------------------------------------------------------------------------------------------------------------------------------------------------------------------------------------------------------------------------------------------------------------------------------------------------------------------------------------------------------------------------------------------------------------------------------------------------------------------------------------------------------------------------------------------------------|----------------------------------------------------------------------------------------------------------------------------------------------------------------------------------------------------------------------------------------------------------------------------------------------------------------------------------------------------------------------------------------------------------------------------------------------------------------------------------------------------------------------------------------------------------------------------------------------------------------------------------|
| C -1.097671000 0.033489000 0.178608000<br>C 0.757077000 0.035200000 -1.255513000<br>C -0.756690000 -0.035109000 -1.255754000<br>H 0.030049000 1.513439000 1.698752000<br>H -0.030565000 -1.513536000 1.698645000<br>H 2.110701000 -0.026791000 0.561317000<br>H -2.110869000 0.026792000 0.560666000<br>H 1.316949000 0.666680000 -1.940041000<br>H -1.316309000 -0.666650000 -1.940435000                                                                                                                                                                                                                               | C 1.146007000 -0.144688000 0.128292000<br>C -1.108134000 -0.028724000 0.202962000<br>C 0.760889000 0.014344000 -1.221538000<br>C -0.744893000 -0.008874000 -1.220569000<br>H -0.040236000 1.621427000 1.664433000<br>H 0.030432000 -1.478909000 1.723381000<br>H 2.153248000 -0.032868000 0.508452000<br>H -2.120068000 -0.171764000 0.561187000<br>H 1.364338000 0.536935000 -1.953727000<br>H -1.371574000 -0.380430000 -2.021603000                                                                                                                                                                                           |
| Imaginary frequency : 519i cm <sup>-1</sup>                                                                                                                                                                                                                                                                                                                                                                                                                                                                                                                                                                              |                                                                                                                                                                                                                                                                                                                                                                                                                                                                                                                                                                                                                                  |
| <b>9 (Prefulvene in the T<sub>1</sub> state - conformer 1)</b><br>E : -232.138529837 a.u.<br>C 1.430413000 0.000279000 -0.647324000<br>C 0.682220000 -0.783883000 0.364333000<br>C -0.728875000 -1.145945000 0.061866000<br>C 0.681843000 0.784269000 0.364187000<br>C -1.494720000 -0.000377000 -0.126492000<br>C -0.729427000 1.145595000 0.061654000<br>H 2.494498000 0.000517000 -0.844595000<br>H 1.248371000 -1.378038000 1.077527000<br>H -1.073034000 -2.167336000 -0.029659000<br>H 1.247707000 1.378828000 1.077272000<br>H -2.539463000 -0.000655000 -0.411225000<br>H -1.074077000 2.166803000 -0.030061000  | <b>10 (TS Prefulvene conf. 1 to conf.2 in the T<sub>1</sub> state)</b><br>E : -232.134377925 a.u.<br>C -0.456150000 0.889998000 1.178158000<br>C 0.251357000 -0.380783000 0.974262000<br>C 1.310070000 -0.411410000 -0.079033000<br>C -1.056345000 -0.022795000 0.196307000<br>C 0.757382000 -0.102287000 -1.318581000<br>C -0.614417000 0.115318000 -1.223600000<br>H -0.525778000 1.814786000 1.722530000<br>H 0.266926000 -1.119760000 1.773861000<br>H 2.353388000 -0.615288000 0.121119000<br>H -2.011581000 -0.495719000 0.418896000<br>H 1.326435000 -0.016844000 -2.236405000<br>H -1.275951000 0.378030000 -2.038148000 |
| Imaginary frequency : 519i cm <sup>-1</sup>                                                                                                                                                                                                                                                                                                                                                                                                                                                                                                                                                                              |                                                                                                                                                                                                                                                                                                                                                                                                                                                                                                                                                                                                                                  |
| <b>11 (Prefulvene in the T<sub>1</sub> state - conformer 2)</b><br>E : -232.138784256 a.u.<br>C -0.524687000 0.825176000 1.249082000<br>C 0.206196000 -0.447864000 1.002979000<br>C 1.286056000 -0.382538000 -0.017325000<br>C -1.088206000 -0.101793000 0.229731000<br>C 0.741478000 -0.021246000 -1.248704000<br>C -0.641794000 0.133186000 -1.169114000<br>H -0.199181000 1.854816000 1.164131000<br>H 0.218679000 -1.204988000 1.782161000<br>H 2.332740000 -0.559551000 0.188836000<br>H -2.028133000 -0.604499000 0.440286000<br>H 1.320979000 0.129743000 -2.151424000<br>H -1.298795000 0.412805000 -1.981272000 | <b>12 (TS Prefulvene to benzene in the T<sub>1</sub> state)</b><br>E : -232.129259148 a.u.<br>C 1.451129000 0.000294000 -0.557030000<br>C 0.707657000 -0.975380000 0.218484000<br>C -0.717244000 -1.154432000 0.042651000<br>C 0.707176000 0.975755000 0.218308000<br>C -1.470181000 -0.000364000 -0.160803000<br>C -0.717813000 1.154100000 0.042410000<br>H 2.534729000 0.000556000 -0.515227000<br>H 1.243627000 -1.644544000 0.890637000<br>H -1.152915000 -2.145414000 0.113077000<br>H 1.242811000 1.645242000 0.890404000<br>H -2.529562000 -0.000646000 -0.378035000<br>H -1.153956000 2.144890000 0.112607000           |
| Imaginary frequency : 369i cm <sup>-1</sup>                                                                                                                                                                                                                                                                                                                                                                                                                                                                                                                                                                              |                                                                                                                                                                                                                                                                                                                                                                                                                                                                                                                                                                                                                                  |
| <b>13 (Benzene in the T<sub>1</sub> state - antiquinoid)</b><br>E : -232.1699201 a.u.<br>C -0.759873000 1.208112000 0.000000000<br>C -1.440967000 0.000000000 0.000000000<br>C -0.759873000 -1.208112000 0.000000000<br>C 0.759873000 -1.208112000 0.000000000<br>C 1.440967000 0.000000000 0.000000000<br>C 0.759873000 1.208112000 0.000000000<br>H -1.286726000 2.153140000 0.000000000<br>H -2.526366000 0.000000000 0.000000000<br>H -1.286726000 -2.153140000 0.000000000<br>H 1.286726000 -2.153140000 0.000000000<br>H 2.526366000 0.000000000 0.000000000<br>H 1.286726000 2.153140000 0.000000000              |                                                                                                                                                                                                                                                                                                                                                                                                                                                                                                                                                                                                                                  |

## 7.5 Protonation of benzene

The vertical excitation energy of **2** (benzenium cation) is calculated to be 310 – 315 nm (at TD-B3LYP and CASPT2//CASSCF levels), in agreement with earlier experimental results (325 – 330 nm).<sup>60,61</sup> Methylated derivatives of **1** (bicyclo[3.1.0]hexene) have markedly red-shifted absorption maxima.<sup>62</sup> Interestingly, Olah *et al.* found that one of those, upon irradiation at its absorption maximum (390 nm)<sup>63</sup> rearranges to a bicyclo[3.1.0]hexenium cation **3** and this cation is further nucleophilically attacked by solvent from the *exo* face.<sup>64</sup>

**Table S16.** Cartesian coordinates and absolute energies of **protonated benzene** (C<sub>6</sub>H<sub>7</sub><sup>+</sup>): stationary points in the S<sub>0</sub>, S<sub>1</sub>, and T<sub>1</sub> states calculated with (TD/U)-B3LYP/6-311+G(d,p) in the gas phase (see Figure 2 in the main text).

|                                                                                                                                                                                                                                                                                                                                                                                                                                                                                                                                                                                                                                                                                                                                                                 |                                                                                                                                                                                                                                                                                                                                                                                                                                                                                                                                                                                                                                                                                                                                            |
|-----------------------------------------------------------------------------------------------------------------------------------------------------------------------------------------------------------------------------------------------------------------------------------------------------------------------------------------------------------------------------------------------------------------------------------------------------------------------------------------------------------------------------------------------------------------------------------------------------------------------------------------------------------------------------------------------------------------------------------------------------------------|--------------------------------------------------------------------------------------------------------------------------------------------------------------------------------------------------------------------------------------------------------------------------------------------------------------------------------------------------------------------------------------------------------------------------------------------------------------------------------------------------------------------------------------------------------------------------------------------------------------------------------------------------------------------------------------------------------------------------------------------|
| <p><b>2 Benzenium cation in the S<sub>0</sub> state</b></p> <p>E : -232.611193322 a.u.</p> <pre> C   0.000000000    1.253008000    0.628502000 C   0.000000000    0.000000000    1.394693000 C   0.000000000   -1.253008000    0.628502000 C   0.000000000   -1.239290000   -0.740100000 C   0.000000000    0.000000000   -1.413014000 C   0.000000000    1.239290000   -0.740100000 H   0.000000000    0.000000000   -2.499042000 H   0.000000000    2.160328000   -1.309415000 H   0.000000000    2.188981000    1.177322000 H   0.000000000   -2.188981000    1.177322000 H   0.000000000   -2.160328000   -1.309415000 H  -0.849235000    0.000000000    2.106163000 H   0.849235000    0.000000000    2.106163000 </pre>                                   | <p><b>3 Bicyclo[3.1.0]hexenium cation in the S<sub>0</sub> state</b></p> <p>E : -232.568648213 a.u.</p> <pre> C   0.251961000   -0.749494000    0.743027000 C  -1.068866000   -1.112001000    0.000000000 C   0.251961000   -0.749494000   -0.743027000 C   0.251961000    0.655309000   -1.126982000 C   0.281886000    1.474598000    0.000000000 C   0.251961000    0.655309000    1.126982000 H   0.226366000    2.554010000    0.000000000 H   0.158387000    1.002855000    2.150408000 H   0.683817000   -1.529995000    1.356723000 H   0.683817000   -1.529995000   -1.356723000 H   0.158387000    1.002855000   -2.150408000 H  -1.361474000   -2.155879000    0.000000000 H  -1.874475000   -0.389209000    0.000000000 </pre> |
| <p><b>TS Benzenium cation to bicyclo[3.1.0]hexenium cation in the S<sub>0</sub> state</b></p> <p>E : -232.534026829 a.u.</p> <pre> C  -0.244399000    1.128504000    0.631042000 C   0.309306000   -0.127223000    1.508319000 C  -0.330475000   -1.031586000    0.628683000 C   0.185721000   -1.212192000   -0.722788000 C   0.246146000   -0.072266000   -1.428342000 C  -0.146821000    1.157668000   -0.698155000 H   0.525169000   -0.044343000   -2.473933000 H  -0.346638000    2.074940000   -1.241121000 H  -0.580685000    1.936409000    1.269305000 H  -1.296074000   -1.468668000    0.896247000 H   0.355981000   -2.205770000   -1.125770000 H  -0.075644000   -0.071645000    2.521567000 H   1.398412000   -0.063830000    1.440855000 </pre> |                                                                                                                                                                                                                                                                                                                                                                                                                                                                                                                                                                                                                                                                                                                                            |
| <p><b>Benzenium cation in the S<sub>1</sub> state (C<sub>2v</sub>)</b></p> <p>E : -232.466753410 a.u.</p>                                                                                                                                                                                                                                                                                                                                                                                                                                                                                                                                                                                                                                                       | <p><b>Benzenium cation in the S<sub>1</sub> state (C<sub>s</sub>)</b></p> <p>E : -232.471728622 a.u.</p>                                                                                                                                                                                                                                                                                                                                                                                                                                                                                                                                                                                                                                   |

|                                                                        |              |              |              |                                                                            |              |              |              |
|------------------------------------------------------------------------|--------------|--------------|--------------|----------------------------------------------------------------------------|--------------|--------------|--------------|
| C                                                                      | 0.000000000  | 1.221113000  | -0.644594000 | C                                                                          | 0.146977000  | 0.725876000  | 1.194069000  |
| C                                                                      | 0.000000000  | 0.000000000  | -1.488474000 | C                                                                          | 0.146977000  | -0.689396000 | 1.088310000  |
| C                                                                      | 0.000000000  | -1.221113000 | -0.644594000 | C                                                                          | 0.146977000  | -0.689396000 | -1.088310000 |
| C                                                                      | 0.000000000  | -1.209031000 | 0.765741000  | C                                                                          | 0.146977000  | 0.725876000  | -1.194069000 |
| C                                                                      | 0.000000000  | 0.000000000  | 1.503019000  | C                                                                          | 0.065429000  | 1.466286000  | 0.000000000  |
| C                                                                      | 0.000000000  | 1.209031000  | 0.765741000  | H                                                                          | 0.044718000  | 2.548302000  | 0.000000000  |
| H                                                                      | 0.000000000  | 0.000000000  | 2.583879000  | H                                                                          | 0.284328000  | 1.202207000  | 2.158190000  |
| H                                                                      | 0.000000000  | 2.159785000  | 1.286606000  | H                                                                          | 0.741289000  | -1.307670000 | 1.757490000  |
| H                                                                      | 0.000000000  | 2.185455000  | -1.145698000 | H                                                                          | 0.741289000  | -1.307670000 | -1.757490000 |
| H                                                                      | 0.000000000  | -2.185455000 | -1.145698000 | H                                                                          | 0.284328000  | 1.202207000  | -2.158190000 |
| H                                                                      | 0.000000000  | -2.159785000 | 1.286606000  | C                                                                          | -0.630895000 | -1.351330000 | 0.000000000  |
| H                                                                      | 0.855602000  | 0.000000000  | -2.203367000 | H                                                                          | -0.548557000 | -2.434386000 | 0.000000000  |
| H                                                                      | -0.855602000 | 0.000000000  | -2.203367000 | H                                                                          | -1.682055000 | -1.030488000 | 0.000000000  |
| Imaginary frequencies : 774i cm <sup>-1</sup> and 55i cm <sup>-1</sup> |              |              |              |                                                                            |              |              |              |
| <b>Benzenium cation in the T<sub>1</sub> state (C<sub>2v</sub>)</b>    |              |              |              | <b>Benzenium cation minimum in the T<sub>1</sub> state (C<sub>s</sub>)</b> |              |              |              |
| E : -232.527660223 a.u.                                                |              |              |              | E : -232.530897144 a.u.                                                    |              |              |              |
| C                                                                      | 0.000000000  | 1.239300000  | -0.650703000 | C                                                                          | -0.655223000 | -1.195379000 | -0.168952000 |
| C                                                                      | 0.000000000  | 0.000000000  | -1.488010000 | C                                                                          | -1.452195000 | 0.000000000  | 0.263789000  |
| C                                                                      | 0.000000000  | -1.239300000 | -0.650703000 | C                                                                          | -0.655223000 | 1.195379000  | -0.168952000 |
| C                                                                      | 0.000000000  | -1.201567000 | 0.770419000  | C                                                                          | 0.751401000  | 1.198343000  | -0.029433000 |
| C                                                                      | 0.000000000  | 0.000000000  | 1.491705000  | C                                                                          | 1.466649000  | 0.000000000  | 0.120738000  |
| C                                                                      | 0.000000000  | 1.201567000  | 0.770419000  | C                                                                          | 0.751401000  | -1.198343000 | -0.029433000 |
| H                                                                      | 0.000000000  | 0.000000000  | 2.572576000  | H                                                                          | 2.539583000  | 0.000000000  | 0.256290000  |
| H                                                                      | 0.000000000  | 2.145956000  | 1.306116000  | H                                                                          | 1.282060000  | -2.145510000 | -0.069342000 |
| H                                                                      | 0.000000000  | 2.203525000  | -1.146559000 | H                                                                          | -1.158761000 | -2.043934000 | -0.621317000 |
| H                                                                      | 0.000000000  | -2.203525000 | -1.146559000 | H                                                                          | -1.158761000 | 2.043934000  | -0.621317000 |
| H                                                                      | 0.000000000  | -2.145956000 | 1.306116000  | H                                                                          | 1.282060000  | 2.145510000  | -0.069342000 |
| H                                                                      | 0.863174000  | 0.000000000  | -2.175227000 | H                                                                          | -1.572181000 | 0.000000000  | 1.361838000  |
| H                                                                      | -0.863174000 | 0.000000000  | -2.175227000 | H                                                                          | -2.454860000 | 0.000000000  | -0.163351000 |
| Imaginary frequency : 195i cm <sup>-1</sup>                            |              |              |              |                                                                            |              |              |              |

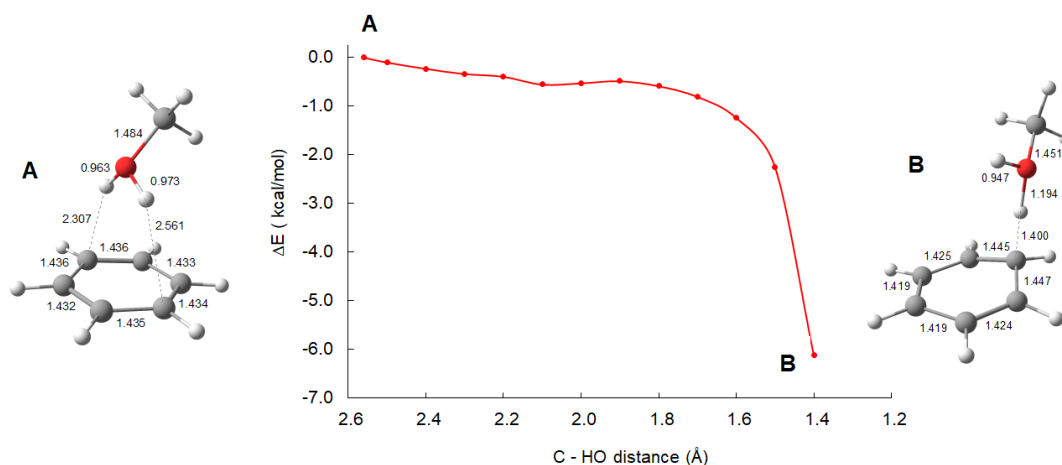

**Figure S37.** PES for protonation of benzene in the S<sub>1</sub> state by MeOH<sub>2</sub><sup>+</sup> calculated at MS4-CASPT2(8,8)/ANO-RCC-VTZP//SA4-CASSCF(8,8)/ANO-RCC-VTZP level. The starting point (structure A) corresponds to the equilibrium geometry (without constraints) and the last point (structure B) corresponds to the last converged optimization with the C–OH distance constrained.

**Table S17.** Cartesian coordinates and energies for the first and last points of the PES for protonation of benzene in the  $S_1$  state by  $\text{MeOH}_2^+$  calculated at MS4-CASPT2(8,8)/ANO-RCC-VTZP//SA4-CASSCF(8,8)/ANO-RCC-VTZP level.

| Benzene + $\text{MeOH}_2^+$ (r C-OH = 2.561 Å) |             |             |             | Benzene + $\text{MeOH}_2^+$ (r C-OH = 1.400 Å) |             |             |             |
|------------------------------------------------|-------------|-------------|-------------|------------------------------------------------|-------------|-------------|-------------|
| E : -347.58058175 a.u.                         |             |             |             | E : -347.5903285 a.u.                          |             |             |             |
| C                                              | -0.73832978 | 1.54526871  | -0.73992927 | C                                              | -1.21132059 | 1.60732246  | -0.86801895 |
| C                                              | -0.85261014 | 1.49948641  | 0.68678267  | C                                              | -0.60988753 | 1.43103125  | 0.41078905  |
| C                                              | -1.02604109 | 0.24123028  | 1.35536011  | C                                              | -0.22360544 | 0.12143738  | 0.88853108  |
| C                                              | -1.16314662 | -0.96038237 | 0.58416120  | C                                              | -0.97171208 | -0.94847314 | 0.26919224  |
| C                                              | -1.04360158 | -0.91616600 | -0.84321013 | C                                              | -1.57616538 | -0.78868382 | -1.01159654 |
| C                                              | -0.78816178 | 0.33165218  | -1.50572210 | C                                              | -1.63299579 | 0.48668994  | -1.63045322 |
| O                                              | 1.99174355  | 0.04314713  | 0.02222446  | O                                              | 2.24611233  | -0.06726469 | 0.12176769  |
| C                                              | 2.84529579  | -1.17097299 | 0.00649127  | C                                              | 3.03540648  | -1.17354333 | 0.62925585  |
| H                                              | -0.64686314 | 2.48743569  | -1.23932722 | H                                              | -1.37276642 | 2.60304731  | -1.22654410 |
| H                                              | -0.84989614 | 2.40925918  | 1.25045643  | H                                              | -0.43698555 | 2.28605099  | 1.03373158  |
| H                                              | -1.18217651 | 0.21678747  | 2.41417369  | H                                              | -0.03202609 | 0.03070522  | 1.94770074  |
| H                                              | -1.39589505 | -1.88486732 | 1.07088088  | H                                              | -1.08055314 | -1.88052790 | 0.78787354  |
| H                                              | -1.19108489 | -1.80550185 | -1.42061749 | H                                              | -2.02100398 | -1.64264886 | -1.47962583 |
| H                                              | -0.77961346 | 0.37586455  | -2.57569662 | H                                              | -2.08529464 | 0.61270639  | -2.59013674 |
| H                                              | 1.48129606  | 0.16296167  | 0.84205679  | H                                              | 1.10492623  | -0.01725613 | 0.46928447  |
| H                                              | 1.36397615  | 0.11321020  | -0.70451307 | H                                              | 2.32589712  | 0.05003639  | -0.81497298 |
| H                                              | 2.20883985  | -2.03331202 | 0.09247173  | H                                              | 2.69981714  | -2.09627738 | 0.18555106  |
| H                                              | 3.37023093  | -1.13255452 | -0.92990392 | H                                              | 4.06512186  | -0.97295841 | 0.38927877  |
| H                                              | 3.51272601  | -1.05945710 | 0.84074175  | H                                              | 2.89372364  | -1.17830438 | 1.69527349  |

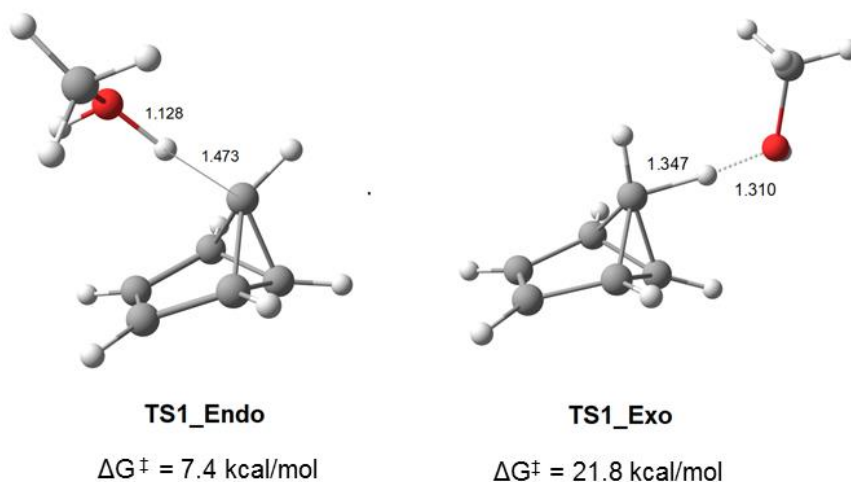

**Figure S38.** *Endo* and *exo* transition state structures for protonation of benzvalene in the  $S_0$  state by  $\text{MeOH}_2^+$  calculated with B3LYP/6-311+G(d,p) using SMD model and methanol as implicit solvent. The most stable transition state structure gives rise to the bicyclo[3.1.0]hexenium ion with the H atom incorporated in the 6-*endo* position.

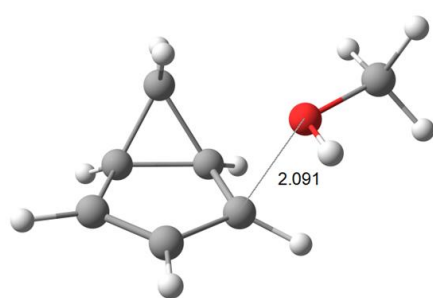

**TS2\_Endo**

$\Delta G^\ddagger = 15.5$  kcal/mol

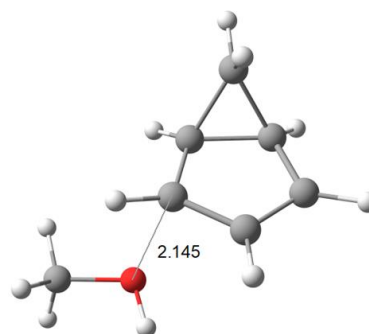

**TS2\_Exo**

$\Delta G^\ddagger = 10.9$  kcal/mol

**Figure S39.** *Endo* and *exo* transition state structures for **nucleophilic attack of MeOH on the protonated bicyclo[3.1.0]hexenium ion** (primary photoproduct from protonation of benzvalene) in the  $S_0$  state calculated with B3LYP/6-311+G(d,p) using SMD model and methanol as implicit solvent.

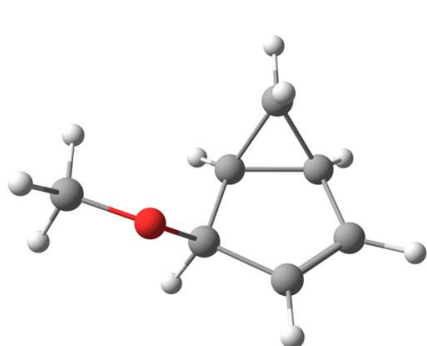

**PROD2\_Endo**

$\Delta G_r = -37.1$  kcal/mol

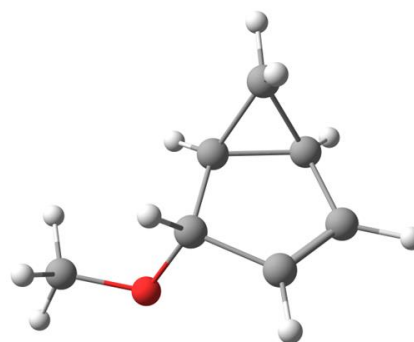

**PROD2\_Exo**

$\Delta G_r = -38.5$  kcal/mol

**Figure S40.** The most stable *endo* and *exo* products resulting from the **addition of MeOH to the bicyclo[3.1.0]hexenium cation** in the  $S_0$  state calculated with B3LYP/6-311+G(d,p) using SMD model and methanol as implicit solvent.

**Table S18.** Geometries of the transition state for **protonation of benzvalene by MeOH<sub>2</sub><sup>+</sup>** (TS1), transition state for nucleophilic attack of MeOH to the protonated benzvalene (TS2), and the products resulted from these reactions calculated at B3LYP/6-311+G(d,p) using SMD model and methanol as implicit solvent.

| TS1_ENDO             | TS1_EXO              |
|----------------------|----------------------|
| E : -348.384164 a.u. | E : -348.359257 a.u. |
| G : -348.259382 a.u. | G : -348.236402 a.u. |

|                                               |                   |              |              |                                                 |                   |              |              |
|-----------------------------------------------|-------------------|--------------|--------------|-------------------------------------------------|-------------------|--------------|--------------|
| C                                             | 1.872132000       | -0.823711000 | -0.174137000 | C                                               | -0.084010000      | 0.053376000  | -0.403389000 |
| C                                             | 0.414133000       | -1.041338000 | 0.218670000  | C                                               | -0.564768000      | -0.128318000 | 1.023671000  |
| C                                             | 0.890924000       | -0.289828000 | -1.132554000 | C                                               | -1.085935000      | -1.086014000 | 0.002138000  |
| C                                             | 1.421810000       | -0.025707000 | 0.976587000  | C                                               | -1.085434000      | 1.056820000  | 0.286399000  |
| C                                             | 0.713644000       | 1.169108000  | -0.830323000 | C                                               | -2.453819000      | -0.612545000 | -0.429215000 |
| C                                             | 1.039192000       | 1.330910000  | 0.462162000  | C                                               | -2.452828000      | 0.712133000  | -0.254796000 |
| H                                             | 2.542525000       | -1.666651000 | -0.236784000 | H                                               | 0.399058000       | 0.194926000  | -1.366536000 |
| H                                             | 0.214076000       | -2.094354000 | 0.400299000  | H                                               | 0.055366000       | -0.241514000 | 1.904952000  |
| H                                             | 0.714653000       | -0.746301000 | -2.096502000 | H                                               | -0.763155000      | -2.118370000 | -0.016423000 |
| H                                             | 1.739405000       | -0.234762000 | 1.988577000  | H                                               | -0.758833000      | 2.059161000  | 0.529149000  |
| H                                             | 0.329215000       | 1.898117000  | -1.529425000 | H                                               | -3.231077000      | -1.255972000 | -0.815252000 |
| H                                             | 0.983713000       | 2.223329000  | 1.069324000  | H                                               | -3.229160000      | 1.434703000  | -0.460392000 |
| H                                             | -2.538816000      | 0.610770000  | -1.146526000 | H                                               | 3.124746000       | 1.155292000  | -0.970691000 |
| C                                             | -2.856204000      | -0.111892000 | -0.396745000 | C                                               | 3.355406000       | 0.163442000  | -0.587124000 |
| H                                             | -2.813849000      | -1.127171000 | -0.782621000 | H                                               | 4.363193000       | 0.147303000  | -0.173555000 |
| H                                             | -3.850235000      | 0.116016000  | -0.018773000 | H                                               | 3.248707000       | -0.586738000 | -1.371942000 |
| O                                             | -1.939604000      | -0.075478000 | 0.748161000  | O                                               | 2.410238000       | -0.092869000 | 0.489772000  |
| H                                             | -0.900391000      | -0.440862000 | 0.503862000  | H                                               | 1.156041000       | -0.035108000 | 0.115586000  |
| H                                             | -1.877246000      | 0.820440000  | 1.121318000  | H                                               | 2.581532000       | -0.964098000 | 0.880830000  |
| Imaginary frequency: $-676i$ $\text{cm}^{-1}$ |                   |              |              | Imaginary frequency : $-1237i$ $\text{cm}^{-1}$ |                   |              |              |
| <b>TS2_ENDO</b>                               |                   |              |              | <b>TS2_EXO</b>                                  |                   |              |              |
| E                                             | :-348.435965 a.u. |              |              | E                                               | :-348.440787 a.u. |              |              |
| G                                             | :-348.304913 a.u. |              |              | G                                               | :-348.311916 a.u. |              |              |
| C                                             | -0.005440000      | 1.431527000  | -1.372499000 | C                                               | -1.532922000      | -2.289139000 | 0.507757000  |
| C                                             | 0.049779000       | -0.111898000 | -1.166273000 | C                                               | -2.091959000      | -1.093497000 | -0.279982000 |
| C                                             | -1.245994000      | 0.605023000  | -1.485000000 | C                                               | -0.612669000      | -1.332519000 | -0.261719000 |
| C                                             | -0.105786000      | -0.597168000 | 0.200084000  | C                                               | -2.295154000      | 0.073528000  | 0.589352000  |
| C                                             | -2.034105000      | 0.535076000  | -0.226507000 | C                                               | -0.055302000      | -0.278335000 | 0.590957000  |
| C                                             | -1.377170000      | -0.169975000 | 0.726956000  | C                                               | -1.109058000      | 0.536698000  | 1.089522000  |
| H                                             | 0.454683000       | 1.785326000  | -2.287270000 | H                                               | -1.659597000      | -3.273247000 | 0.071652000  |
| H                                             | 0.610879000       | -0.682469000 | -1.892273000 | H                                               | -2.725332000      | -1.296961000 | -1.132857000 |
| H                                             | -1.719689000      | 0.476263000  | -2.450171000 | H                                               | -0.059284000      | -1.746107000 | -1.092657000 |
| H                                             | 0.445268000       | -1.446339000 | 0.580362000  | H                                               | -3.274370000      | 0.451252000  | 0.860214000  |
| H                                             | -2.989767000      | 1.029576000  | -0.098080000 | H                                               | -0.987248000      | 1.323540000  | 1.820397000  |
| H                                             | -1.708945000      | -0.350911000 | 1.739791000  | H                                               | 2.606090000       | 1.354928000  | -1.956702000 |
| H                                             | 2.878731000       | -0.689374000 | 1.101636000  | C                                               | 2.239537000       | 0.665388000  | -1.192472000 |
| C                                             | 2.600526000       | 0.363059000  | 1.010720000  | H                                               | 2.849841000       | 0.751418000  | -0.290274000 |
| H                                             | 2.732470000       | 0.700347000  | -0.016076000 | H                                               | 2.280410000       | -0.353953000 | -1.574191000 |
| H                                             | 3.215022000       | 0.972251000  | 1.677061000  | H                                               | -1.558345000      | -2.238044000 | 1.588882000  |
| H                                             | 0.143458000       | 2.042391000  | -0.491418000 | H                                               | 0.921933000       | -0.346520000 | 1.049990000  |
| O                                             | 1.207872000       | 0.559689000  | 1.344342000  | O                                               | 0.853989000       | 0.955316000  | -0.910023000 |
| H                                             | 1.060140000       | 0.266706000  | 2.256956000  | H                                               | 0.790400000       | 1.847886000  | -0.539083000 |
| Imaginary frequency: $166i$ $\text{cm}^{-1}$  |                   |              |              | Imaginary frequency : $93i$ $\text{cm}^{-1}$    |                   |              |              |
| <b>PROD2_ENDO</b>                             |                   |              |              | <b>PROD2_EXO</b>                                |                   |              |              |
| E                                             | :-348.021987 a.u. |              |              | E                                               | :-348.024163 a.u. |              |              |
| G                                             | :-347.899957 a.u. |              |              | G                                               | :-347.902211 a.u. |              |              |
| C                                             | -0.997086000      | -1.784201000 | -0.197083000 | C                                               | -1.127434000      | -1.788671000 | -0.113083000 |
| C                                             | -1.773886000      | -0.596187000 | -0.729552000 | C                                               | -1.781849000      | -0.584857000 | -0.777433000 |
| C                                             | -0.319526000      | -0.793076000 | -1.113461000 | C                                               | -0.309657000      | -0.892203000 | -1.001067000 |
| C                                             | -1.787717000      | 0.603397000  | 0.162504000  | C                                               | -1.794283000      | 0.653181000  | 0.048995000  |
| C                                             | 0.479160000       | 0.347765000  | -0.464443000 | C                                               | 0.496354000       | 0.230333000  | -0.339583000 |
| C                                             | -0.563776000      | 1.104885000  | 0.333915000  | C                                               | -0.557582000      | 1.087680000  | 0.321376000  |
| H                                             | -1.222937000      | -2.759187000 | -0.614291000 | H                                               | -1.376652000      | -2.770536000 | -0.501937000 |
| H                                             | -2.576625000      | -0.764484000 | -1.437551000 | H                                               | -2.538260000      | -0.752038000 | -1.535124000 |
| H                                             | -0.058093000      | -1.114156000 | -2.113747000 | H                                               | 0.040595000       | -1.284087000 | -1.947914000 |
| H                                             | -2.689063000      | 0.974762000  | 0.636490000  | H                                               | -2.709148000      | 1.106011000  | 0.416262000  |
| H                                             | 0.919199000       | 0.986690000  | -1.248125000 | H                                               | -0.301269000      | 1.926232000  | 0.958724000  |
| H                                             | -0.290623000      | 1.922804000  | 0.988508000  | H                                               | 2.914935000       | 1.148910000  | -2.411347000 |
| H                                             | 3.375360000       | -0.879046000 | 0.501984000  | C                                               | 2.453238000       | 0.446726000  | -1.715403000 |

|   |              |              |              |   |              |              |              |
|---|--------------|--------------|--------------|---|--------------|--------------|--------------|
| C | 2.615370000  | -0.672091000 | -0.252112000 | H | 3.123076000  | 0.292120000  | -0.860482000 |
| H | 2.321751000  | -1.615440000 | -0.730291000 | H | 2.299317000  | -0.510499000 | -2.226530000 |
| H | 3.041922000  | -0.005969000 | -1.016255000 | O | 1.218415000  | 1.029340000  | -1.296090000 |
| O | 1.526818000  | -0.059615000 | 0.413455000  | H | -0.974435000 | -1.745767000 | 0.960805000  |
| H | -0.725340000 | -1.781597000 | 0.851888000  | H | 1.220373000  | -0.158228000 | 0.389632000  |

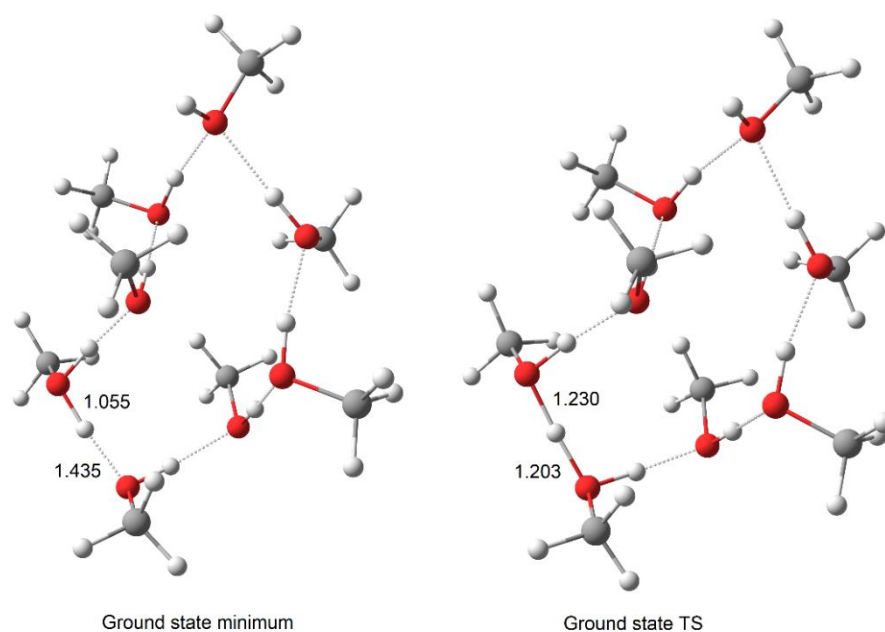

**Figure S41.** Protonation of **methanol cluster**. Ground state minimum and ground state transition state for proton transfer within a  $(\text{MeOH})_8\text{H}^+$  cluster calculated at B3LYP-D3/6-311+g(d,p) using SMD implicit solvation model and methanol as implicit solvent. The O–H bond lengths (in Å) involved in the proton transfer are also shown. The methanol cluster containing eight molecules of methanol was based conclusions drawn in reference 41 that this number corresponds to a saturated cluster with regard to the number of MeOH molecules.

**Table S19.** Vertical energies, adiabatic energies, and activation barriers, in kcal/mol, for **benzene**, **pyridinium ion**, and **silabenzene** optimized at SA-CASSCF(6,6)/ANO-RCC-VTZP level. Single point energies were computed at MS-CASPT2(6,6)/ANO-RCC-VTZP.

| Energies (kcal/mol)      | Benzene | Silabenzene | Pyridinium ion |
|--------------------------|---------|-------------|----------------|
| <b>SA-CASSCF(6,6)</b>    |         |             |                |
| Vertical excitation      | 113.4   | 95.1        | 122.5          |
| Adiabatic $S_1$ energy   | 108.1   | 78.4        | 117.4          |
| $S_1$ Activation barrier | 20.0    | 6.6         | 8.8            |
| Adiabatic CI energy      | 127.1   | 85.0        | 126.1          |



---

**MS-CASPT2(6,6)**

|                                   |       |      |       |
|-----------------------------------|-------|------|-------|
| Vertical excitation               | 117.3 | 98.5 | 119.4 |
| Adiabatic S <sub>1</sub> energy   | 112.9 | 93.6 | 114.2 |
| S <sub>1</sub> Activation barrier | 9.4   | -3.5 | -3.2  |
| Adiabatic CI energy               | 120.2 | 89.9 | 111.0 |

---

**Table S20.** Electronic energies (in a.u.), configurations, and configuration weights for **silabenzene** in the S<sub>0</sub> and along of the puckering coordinate calculated at SA3-CASSCF(6,6)/ANO-RCC-VTZP level. Absolute energies at MS3-CASPT2(6,6)/ANO-RCC-VTZP level. The optimized state is shown in italics while the remaining states are single point calculations at the respective optimized geometry.

| <b>Optimized Geometry</b>          | <b>State</b>         | <b>SA-CASSCF</b> | <b>MS-CASPT2</b> | <b>Conf</b> | <b>weight</b> | <b>Conf</b> | <b>weight</b> |
|------------------------------------|----------------------|------------------|------------------|-------------|---------------|-------------|---------------|
| <b>S<sub>0</sub></b>               | <i>S<sub>0</sub></i> | -482.544272      | -483.422567      | 222000      | 0.80          |             |               |
|                                    | S <sub>1</sub>       | -482.392794      | -483.265575      | 2u2d00      | 0.34          | u220d0      | 0.40          |
| <b>S<sub>1</sub></b>               | S <sub>0</sub>       | -482.529189      | -483.393063      | 222000      | 0.76          |             |               |
|                                    | <i>S<sub>1</sub></i> | -482.419347      | -483.273376      | 2u2d00      | 0.46          | u220d0      | 0.20          |
| <b>TS</b>                          | S <sub>0</sub>       | -482.415562      | -483.294379      | 222000      | 0.58          |             |               |
|                                    | S <sub>1</sub>       | -482.408812      | -483.278886      | 2u2d00      | 0.74          |             |               |
| <b>CI</b>                          | S <sub>0</sub>       | -482.408836      | -483.288959      | 222000      | 0.57          |             |               |
|                                    | S <sub>1</sub>       | -482.408835      | -483.279362      | 2u2d00      | 0.74          |             |               |
| <b>C<sub>2v</sub><sup>a)</sup></b> | S <sub>0</sub>       | -482.540184      | -483.418446      | 222000      | 0.78          | u22d00      | 0.10          |
|                                    | <i>S<sub>1</sub></i> | -482.397471      | -483.269465      | u220d0      | 0.40          | 2u2d00      | 0.32          |

<sup>a)</sup> Optimized at B3LYP/6-311+G(d,p) level. Single point calculation at CASPT2//CASSCF level.

**Table S21.** Electronic energies (in a.u.), configurations, and configuration weights for **pyridinium ion** in the S<sub>0</sub> and along of puckering coordinate calculated at SA3-CASSCF(6,6)/ANO-RCC-VTZP level. Absolute energies at MS3-CASPT2(6,6)/ANO-RCC-VTZP level. The optimized state is shown in italics while the remaining states are single point calculations at the respective optimized geometry.

| <b>Optimized Geometry</b>         | <b>State</b>         | <b>SA-CASSCF</b> | <b>MS-CASPT2</b> | <b>Conf</b> | <b>weight</b> | <b>Conf</b> | <b>weight</b> |
|-----------------------------------|----------------------|------------------|------------------|-------------|---------------|-------------|---------------|
| <b>S<sub>0</sub></b>              | <i>S<sub>0</sub></i> | -247.335750      | -248.244749      | 222000      | 0.90          |             |               |
|                                   | S <sub>1</sub>       | -247.140539      | -248.054463      | 2u200d      | 0.59          | 22ud00      | 0.20          |
| <b>S<sub>1</sub><sup>a)</sup></b> | S <sub>0</sub>       | -247.327264      | -248.238218      | 222000      | 0.88          |             |               |
|                                   | <i>S<sub>1</sub></i> | -247.148692      | -248.062765      | 2u200d      | 0.59          | 22ud00      | 0.18          |

---

|           |                |             |             |        |      |
|-----------|----------------|-------------|-------------|--------|------|
| <b>TS</b> | S <sub>0</sub> |             |             |        |      |
|           | S <sub>1</sub> | Not found   |             |        |      |
| <b>CI</b> | S <sub>0</sub> | -247.134735 | -248.076631 | 2u200d | 0.85 |
|           | S <sub>1</sub> | -247.134735 | -248.067935 | 222000 | 0.83 |

a) At B3LYP/6-311+G(d,p) level S<sub>1</sub> minimum is puckered (C<sub>s</sub> symmetric) and the planar structure (C<sub>2v</sub>) has 2 imaginary frequencies corresponding to the out-of-plane vibrations.

| <b>Benzene</b>                                                                                                                                                                                                                                                                                                                                                                                                             | <b>Silabenzene</b> | <b>Pyridinium ion</b> |          |       |          |       |          |       |                                                                                                                                                                                                                                                                                                                                                                                                                              |           |       |          |       |          |       |           |       |                                                                                                                                                                                                                                                                                                                                                                                                                                |          |       |          |       |          |       |          |       |
|----------------------------------------------------------------------------------------------------------------------------------------------------------------------------------------------------------------------------------------------------------------------------------------------------------------------------------------------------------------------------------------------------------------------------|--------------------|-----------------------|----------|-------|----------|-------|----------|-------|------------------------------------------------------------------------------------------------------------------------------------------------------------------------------------------------------------------------------------------------------------------------------------------------------------------------------------------------------------------------------------------------------------------------------|-----------|-------|----------|-------|----------|-------|-----------|-------|--------------------------------------------------------------------------------------------------------------------------------------------------------------------------------------------------------------------------------------------------------------------------------------------------------------------------------------------------------------------------------------------------------------------------------|----------|-------|----------|-------|----------|-------|----------|-------|
| <p><b>S<sub>0</sub> state</b></p> 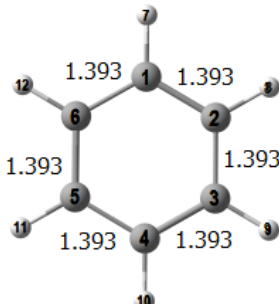 <p>Angles (in degrees):</p> <table> <tr><td>C1-C2-C3</td><td>120.0</td></tr> <tr><td>C2-C3-C4</td><td>120.0</td></tr> <tr><td>C4-C5-C6</td><td>120.0</td></tr> <tr><td>C6-C1-C2</td><td>120.0</td></tr> </table>                                                                                      | C1-C2-C3           | 120.0                 | C2-C3-C4 | 120.0 | C4-C5-C6 | 120.0 | C6-C1-C2 | 120.0 | <p><b>S<sub>0</sub> state</b></p>  <p>Angles (in degrees):</p> <table> <tr><td>Si1-C2-C3</td><td>116.8</td></tr> <tr><td>C2-C3-C4</td><td>125.5</td></tr> <tr><td>C4-C5-C6</td><td>125.7</td></tr> <tr><td>C6-Si1-C2</td><td>109.6</td></tr> </table>                                                                                      | Si1-C2-C3 | 116.8 | C2-C3-C4 | 125.5 | C4-C5-C6 | 125.7 | C6-Si1-C2 | 109.6 | <p><b>S<sub>0</sub> state</b></p>  <p>Angles (in degrees):</p> <table> <tr><td>N1-C2-C3</td><td>119.4</td></tr> <tr><td>C2-C3-C4</td><td>118.9</td></tr> <tr><td>C4-C5-C6</td><td>119.9</td></tr> <tr><td>C6-N1-C2</td><td>123.5</td></tr> </table>                                                                                        | N1-C2-C3 | 119.4 | C2-C3-C4 | 118.9 | C4-C5-C6 | 119.9 | C6-N1-C2 | 123.5 |
| C1-C2-C3                                                                                                                                                                                                                                                                                                                                                                                                                   | 120.0              |                       |          |       |          |       |          |       |                                                                                                                                                                                                                                                                                                                                                                                                                              |           |       |          |       |          |       |           |       |                                                                                                                                                                                                                                                                                                                                                                                                                                |          |       |          |       |          |       |          |       |
| C2-C3-C4                                                                                                                                                                                                                                                                                                                                                                                                                   | 120.0              |                       |          |       |          |       |          |       |                                                                                                                                                                                                                                                                                                                                                                                                                              |           |       |          |       |          |       |           |       |                                                                                                                                                                                                                                                                                                                                                                                                                                |          |       |          |       |          |       |          |       |
| C4-C5-C6                                                                                                                                                                                                                                                                                                                                                                                                                   | 120.0              |                       |          |       |          |       |          |       |                                                                                                                                                                                                                                                                                                                                                                                                                              |           |       |          |       |          |       |           |       |                                                                                                                                                                                                                                                                                                                                                                                                                                |          |       |          |       |          |       |          |       |
| C6-C1-C2                                                                                                                                                                                                                                                                                                                                                                                                                   | 120.0              |                       |          |       |          |       |          |       |                                                                                                                                                                                                                                                                                                                                                                                                                              |           |       |          |       |          |       |           |       |                                                                                                                                                                                                                                                                                                                                                                                                                                |          |       |          |       |          |       |          |       |
| Si1-C2-C3                                                                                                                                                                                                                                                                                                                                                                                                                  | 116.8              |                       |          |       |          |       |          |       |                                                                                                                                                                                                                                                                                                                                                                                                                              |           |       |          |       |          |       |           |       |                                                                                                                                                                                                                                                                                                                                                                                                                                |          |       |          |       |          |       |          |       |
| C2-C3-C4                                                                                                                                                                                                                                                                                                                                                                                                                   | 125.5              |                       |          |       |          |       |          |       |                                                                                                                                                                                                                                                                                                                                                                                                                              |           |       |          |       |          |       |           |       |                                                                                                                                                                                                                                                                                                                                                                                                                                |          |       |          |       |          |       |          |       |
| C4-C5-C6                                                                                                                                                                                                                                                                                                                                                                                                                   | 125.7              |                       |          |       |          |       |          |       |                                                                                                                                                                                                                                                                                                                                                                                                                              |           |       |          |       |          |       |           |       |                                                                                                                                                                                                                                                                                                                                                                                                                                |          |       |          |       |          |       |          |       |
| C6-Si1-C2                                                                                                                                                                                                                                                                                                                                                                                                                  | 109.6              |                       |          |       |          |       |          |       |                                                                                                                                                                                                                                                                                                                                                                                                                              |           |       |          |       |          |       |           |       |                                                                                                                                                                                                                                                                                                                                                                                                                                |          |       |          |       |          |       |          |       |
| N1-C2-C3                                                                                                                                                                                                                                                                                                                                                                                                                   | 119.4              |                       |          |       |          |       |          |       |                                                                                                                                                                                                                                                                                                                                                                                                                              |           |       |          |       |          |       |           |       |                                                                                                                                                                                                                                                                                                                                                                                                                                |          |       |          |       |          |       |          |       |
| C2-C3-C4                                                                                                                                                                                                                                                                                                                                                                                                                   | 118.9              |                       |          |       |          |       |          |       |                                                                                                                                                                                                                                                                                                                                                                                                                              |           |       |          |       |          |       |           |       |                                                                                                                                                                                                                                                                                                                                                                                                                                |          |       |          |       |          |       |          |       |
| C4-C5-C6                                                                                                                                                                                                                                                                                                                                                                                                                   | 119.9              |                       |          |       |          |       |          |       |                                                                                                                                                                                                                                                                                                                                                                                                                              |           |       |          |       |          |       |           |       |                                                                                                                                                                                                                                                                                                                                                                                                                                |          |       |          |       |          |       |          |       |
| C6-N1-C2                                                                                                                                                                                                                                                                                                                                                                                                                   | 123.5              |                       |          |       |          |       |          |       |                                                                                                                                                                                                                                                                                                                                                                                                                              |           |       |          |       |          |       |           |       |                                                                                                                                                                                                                                                                                                                                                                                                                                |          |       |          |       |          |       |          |       |
| <p><b>S<sub>1</sub> state</b></p>   <p>Angles (in degrees):</p> <table> <tr><td>C1-C2-C3</td><td>120.0</td></tr> <tr><td>C2-C3-C4</td><td>120.0</td></tr> <tr><td>C4-C5-C6</td><td>120.0</td></tr> <tr><td>C6-C1-C2</td><td>120.0</td></tr> </table> | C1-C2-C3           | 120.0                 | C2-C3-C4 | 120.0 | C4-C5-C6 | 120.0 | C6-C1-C2 | 120.0 | <p><b>S<sub>1</sub> state</b></p>   <p>Angles (in degrees):</p> <table> <tr><td>Si1-C2-C3</td><td>120.7</td></tr> <tr><td>C2-C3-C4</td><td>124.8</td></tr> <tr><td>C4-C5-C6</td><td>125.2</td></tr> <tr><td>C6-Si1-C2</td><td>101.9</td></tr> </table> | Si1-C2-C3 | 120.7 | C2-C3-C4 | 124.8 | C4-C5-C6 | 125.2 | C6-Si1-C2 | 101.9 | <p><b>S<sub>1</sub> state</b></p>   <p>Angles (in degrees):</p> <table> <tr><td>N1-C2-C3</td><td>120.5</td></tr> <tr><td>C2-C3-C4</td><td>120.4</td></tr> <tr><td>C4-C5-C6</td><td>116.8</td></tr> <tr><td>C6-C1-C2</td><td>121.4</td></tr> </table> | N1-C2-C3 | 120.5 | C2-C3-C4 | 120.4 | C4-C5-C6 | 116.8 | C6-C1-C2 | 121.4 |
| C1-C2-C3                                                                                                                                                                                                                                                                                                                                                                                                                   | 120.0              |                       |          |       |          |       |          |       |                                                                                                                                                                                                                                                                                                                                                                                                                              |           |       |          |       |          |       |           |       |                                                                                                                                                                                                                                                                                                                                                                                                                                |          |       |          |       |          |       |          |       |
| C2-C3-C4                                                                                                                                                                                                                                                                                                                                                                                                                   | 120.0              |                       |          |       |          |       |          |       |                                                                                                                                                                                                                                                                                                                                                                                                                              |           |       |          |       |          |       |           |       |                                                                                                                                                                                                                                                                                                                                                                                                                                |          |       |          |       |          |       |          |       |
| C4-C5-C6                                                                                                                                                                                                                                                                                                                                                                                                                   | 120.0              |                       |          |       |          |       |          |       |                                                                                                                                                                                                                                                                                                                                                                                                                              |           |       |          |       |          |       |           |       |                                                                                                                                                                                                                                                                                                                                                                                                                                |          |       |          |       |          |       |          |       |
| C6-C1-C2                                                                                                                                                                                                                                                                                                                                                                                                                   | 120.0              |                       |          |       |          |       |          |       |                                                                                                                                                                                                                                                                                                                                                                                                                              |           |       |          |       |          |       |           |       |                                                                                                                                                                                                                                                                                                                                                                                                                                |          |       |          |       |          |       |          |       |
| Si1-C2-C3                                                                                                                                                                                                                                                                                                                                                                                                                  | 120.7              |                       |          |       |          |       |          |       |                                                                                                                                                                                                                                                                                                                                                                                                                              |           |       |          |       |          |       |           |       |                                                                                                                                                                                                                                                                                                                                                                                                                                |          |       |          |       |          |       |          |       |
| C2-C3-C4                                                                                                                                                                                                                                                                                                                                                                                                                   | 124.8              |                       |          |       |          |       |          |       |                                                                                                                                                                                                                                                                                                                                                                                                                              |           |       |          |       |          |       |           |       |                                                                                                                                                                                                                                                                                                                                                                                                                                |          |       |          |       |          |       |          |       |
| C4-C5-C6                                                                                                                                                                                                                                                                                                                                                                                                                   | 125.2              |                       |          |       |          |       |          |       |                                                                                                                                                                                                                                                                                                                                                                                                                              |           |       |          |       |          |       |           |       |                                                                                                                                                                                                                                                                                                                                                                                                                                |          |       |          |       |          |       |          |       |
| C6-Si1-C2                                                                                                                                                                                                                                                                                                                                                                                                                  | 101.9              |                       |          |       |          |       |          |       |                                                                                                                                                                                                                                                                                                                                                                                                                              |           |       |          |       |          |       |           |       |                                                                                                                                                                                                                                                                                                                                                                                                                                |          |       |          |       |          |       |          |       |
| N1-C2-C3                                                                                                                                                                                                                                                                                                                                                                                                                   | 120.5              |                       |          |       |          |       |          |       |                                                                                                                                                                                                                                                                                                                                                                                                                              |           |       |          |       |          |       |           |       |                                                                                                                                                                                                                                                                                                                                                                                                                                |          |       |          |       |          |       |          |       |
| C2-C3-C4                                                                                                                                                                                                                                                                                                                                                                                                                   | 120.4              |                       |          |       |          |       |          |       |                                                                                                                                                                                                                                                                                                                                                                                                                              |           |       |          |       |          |       |           |       |                                                                                                                                                                                                                                                                                                                                                                                                                                |          |       |          |       |          |       |          |       |
| C4-C5-C6                                                                                                                                                                                                                                                                                                                                                                                                                   | 116.8              |                       |          |       |          |       |          |       |                                                                                                                                                                                                                                                                                                                                                                                                                              |           |       |          |       |          |       |           |       |                                                                                                                                                                                                                                                                                                                                                                                                                                |          |       |          |       |          |       |          |       |
| C6-C1-C2                                                                                                                                                                                                                                                                                                                                                                                                                   | 121.4              |                       |          |       |          |       |          |       |                                                                                                                                                                                                                                                                                                                                                                                                                              |           |       |          |       |          |       |           |       |                                                                                                                                                                                                                                                                                                                                                                                                                                |          |       |          |       |          |       |          |       |

|                                                                                                                                                                                                                                                                                                                                                  |          |       |          |       |          |       |          |      |                                                                                                                                                                                                                                                                                                                                                   |           |       |          |       |          |       |          |      |                                                                                                                                                                                                                                                                                                                                                     |          |       |          |       |          |       |          |      |
|--------------------------------------------------------------------------------------------------------------------------------------------------------------------------------------------------------------------------------------------------------------------------------------------------------------------------------------------------|----------|-------|----------|-------|----------|-------|----------|------|---------------------------------------------------------------------------------------------------------------------------------------------------------------------------------------------------------------------------------------------------------------------------------------------------------------------------------------------------|-----------|-------|----------|-------|----------|-------|----------|------|-----------------------------------------------------------------------------------------------------------------------------------------------------------------------------------------------------------------------------------------------------------------------------------------------------------------------------------------------------|----------|-------|----------|-------|----------|-------|----------|------|
| <p>TS in the S<sub>1</sub> PES</p> 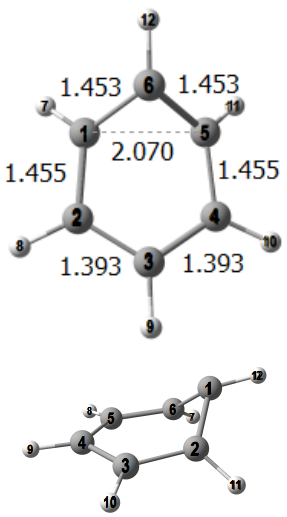 <p>Angles (in degrees):</p> <table border="0"> <tr><td>C1-C2-C3</td><td>120.4</td></tr> <tr><td>C2-C3-C4</td><td>117.5</td></tr> <tr><td>C4-C5-C6</td><td>113.9</td></tr> <tr><td>C6-C1-C2</td><td>90.9</td></tr> </table>  | C1-C2-C3 | 120.4 | C2-C3-C4 | 117.5 | C4-C5-C6 | 113.9 | C6-C1-C2 | 90.9 | <p>TS in the S<sub>1</sub> PES</p>  <p>Angles (in degrees):</p> <table border="0"> <tr><td>Si1-C2-C3</td><td>121.2</td></tr> <tr><td>C2-C3-C4</td><td>120.2</td></tr> <tr><td>C4-C5-C6</td><td>117.7</td></tr> <tr><td>C6-C1-C2</td><td>79.8</td></tr> </table>  | Si1-C2-C3 | 121.2 | C2-C3-C4 | 120.2 | C4-C5-C6 | 117.7 | C6-C1-C2 | 79.8 | <p>TS in the S<sub>1</sub> PES<br/>Not found</p>                                                                                                                                                                                                                                                                                                    |          |       |          |       |          |       |          |      |
| C1-C2-C3                                                                                                                                                                                                                                                                                                                                         | 120.4    |       |          |       |          |       |          |      |                                                                                                                                                                                                                                                                                                                                                   |           |       |          |       |          |       |          |      |                                                                                                                                                                                                                                                                                                                                                     |          |       |          |       |          |       |          |      |
| C2-C3-C4                                                                                                                                                                                                                                                                                                                                         | 117.5    |       |          |       |          |       |          |      |                                                                                                                                                                                                                                                                                                                                                   |           |       |          |       |          |       |          |      |                                                                                                                                                                                                                                                                                                                                                     |          |       |          |       |          |       |          |      |
| C4-C5-C6                                                                                                                                                                                                                                                                                                                                         | 113.9    |       |          |       |          |       |          |      |                                                                                                                                                                                                                                                                                                                                                   |           |       |          |       |          |       |          |      |                                                                                                                                                                                                                                                                                                                                                     |          |       |          |       |          |       |          |      |
| C6-C1-C2                                                                                                                                                                                                                                                                                                                                         | 90.9     |       |          |       |          |       |          |      |                                                                                                                                                                                                                                                                                                                                                   |           |       |          |       |          |       |          |      |                                                                                                                                                                                                                                                                                                                                                     |          |       |          |       |          |       |          |      |
| Si1-C2-C3                                                                                                                                                                                                                                                                                                                                        | 121.2    |       |          |       |          |       |          |      |                                                                                                                                                                                                                                                                                                                                                   |           |       |          |       |          |       |          |      |                                                                                                                                                                                                                                                                                                                                                     |          |       |          |       |          |       |          |      |
| C2-C3-C4                                                                                                                                                                                                                                                                                                                                         | 120.2    |       |          |       |          |       |          |      |                                                                                                                                                                                                                                                                                                                                                   |           |       |          |       |          |       |          |      |                                                                                                                                                                                                                                                                                                                                                     |          |       |          |       |          |       |          |      |
| C4-C5-C6                                                                                                                                                                                                                                                                                                                                         | 117.7    |       |          |       |          |       |          |      |                                                                                                                                                                                                                                                                                                                                                   |           |       |          |       |          |       |          |      |                                                                                                                                                                                                                                                                                                                                                     |          |       |          |       |          |       |          |      |
| C6-C1-C2                                                                                                                                                                                                                                                                                                                                         | 79.8     |       |          |       |          |       |          |      |                                                                                                                                                                                                                                                                                                                                                   |           |       |          |       |          |       |          |      |                                                                                                                                                                                                                                                                                                                                                     |          |       |          |       |          |       |          |      |
| <p>S<sub>1</sub>/S<sub>0</sub></p>  <p>Angles (in degrees):</p> <table border="0"> <tr><td>C1-C2-C3</td><td>120.6</td></tr> <tr><td>C2-C3-C4</td><td>115.8</td></tr> <tr><td>C4-C5-C6</td><td>112.9</td></tr> <tr><td>C6-C1-C2</td><td>83.6</td></tr> </table> | C1-C2-C3 | 120.6 | C2-C3-C4 | 115.8 | C4-C5-C6 | 112.9 | C6-C1-C2 | 83.6 | <p>S<sub>1</sub>/S<sub>0</sub></p>  <p>Angles (in degrees):</p> <table border="0"> <tr><td>Si1-C2-C3</td><td>121.3</td></tr> <tr><td>C2-C3-C4</td><td>119.9</td></tr> <tr><td>C4-C5-C6</td><td>117.4</td></tr> <tr><td>C6-C1-C2</td><td>78.7</td></tr> </table> | Si1-C2-C3 | 121.3 | C2-C3-C4 | 119.9 | C4-C5-C6 | 117.4 | C6-C1-C2 | 78.7 | <p>S<sub>1</sub>/S<sub>0</sub></p>  <p>Angles (in degrees):</p> <table border="0"> <tr><td>N1-C2-C3</td><td>120.2</td></tr> <tr><td>C2-C3-C4</td><td>115.4</td></tr> <tr><td>C4-C5-C6</td><td>112.8</td></tr> <tr><td>C6-C1-C2</td><td>88.9</td></tr> </table> | N1-C2-C3 | 120.2 | C2-C3-C4 | 115.4 | C4-C5-C6 | 112.8 | C6-C1-C2 | 88.9 |
| C1-C2-C3                                                                                                                                                                                                                                                                                                                                         | 120.6    |       |          |       |          |       |          |      |                                                                                                                                                                                                                                                                                                                                                   |           |       |          |       |          |       |          |      |                                                                                                                                                                                                                                                                                                                                                     |          |       |          |       |          |       |          |      |
| C2-C3-C4                                                                                                                                                                                                                                                                                                                                         | 115.8    |       |          |       |          |       |          |      |                                                                                                                                                                                                                                                                                                                                                   |           |       |          |       |          |       |          |      |                                                                                                                                                                                                                                                                                                                                                     |          |       |          |       |          |       |          |      |
| C4-C5-C6                                                                                                                                                                                                                                                                                                                                         | 112.9    |       |          |       |          |       |          |      |                                                                                                                                                                                                                                                                                                                                                   |           |       |          |       |          |       |          |      |                                                                                                                                                                                                                                                                                                                                                     |          |       |          |       |          |       |          |      |
| C6-C1-C2                                                                                                                                                                                                                                                                                                                                         | 83.6     |       |          |       |          |       |          |      |                                                                                                                                                                                                                                                                                                                                                   |           |       |          |       |          |       |          |      |                                                                                                                                                                                                                                                                                                                                                     |          |       |          |       |          |       |          |      |
| Si1-C2-C3                                                                                                                                                                                                                                                                                                                                        | 121.3    |       |          |       |          |       |          |      |                                                                                                                                                                                                                                                                                                                                                   |           |       |          |       |          |       |          |      |                                                                                                                                                                                                                                                                                                                                                     |          |       |          |       |          |       |          |      |
| C2-C3-C4                                                                                                                                                                                                                                                                                                                                         | 119.9    |       |          |       |          |       |          |      |                                                                                                                                                                                                                                                                                                                                                   |           |       |          |       |          |       |          |      |                                                                                                                                                                                                                                                                                                                                                     |          |       |          |       |          |       |          |      |
| C4-C5-C6                                                                                                                                                                                                                                                                                                                                         | 117.4    |       |          |       |          |       |          |      |                                                                                                                                                                                                                                                                                                                                                   |           |       |          |       |          |       |          |      |                                                                                                                                                                                                                                                                                                                                                     |          |       |          |       |          |       |          |      |
| C6-C1-C2                                                                                                                                                                                                                                                                                                                                         | 78.7     |       |          |       |          |       |          |      |                                                                                                                                                                                                                                                                                                                                                   |           |       |          |       |          |       |          |      |                                                                                                                                                                                                                                                                                                                                                     |          |       |          |       |          |       |          |      |
| N1-C2-C3                                                                                                                                                                                                                                                                                                                                         | 120.2    |       |          |       |          |       |          |      |                                                                                                                                                                                                                                                                                                                                                   |           |       |          |       |          |       |          |      |                                                                                                                                                                                                                                                                                                                                                     |          |       |          |       |          |       |          |      |
| C2-C3-C4                                                                                                                                                                                                                                                                                                                                         | 115.4    |       |          |       |          |       |          |      |                                                                                                                                                                                                                                                                                                                                                   |           |       |          |       |          |       |          |      |                                                                                                                                                                                                                                                                                                                                                     |          |       |          |       |          |       |          |      |
| C4-C5-C6                                                                                                                                                                                                                                                                                                                                         | 112.8    |       |          |       |          |       |          |      |                                                                                                                                                                                                                                                                                                                                                   |           |       |          |       |          |       |          |      |                                                                                                                                                                                                                                                                                                                                                     |          |       |          |       |          |       |          |      |
| C6-C1-C2                                                                                                                                                                                                                                                                                                                                         | 88.9     |       |          |       |          |       |          |      |                                                                                                                                                                                                                                                                                                                                                   |           |       |          |       |          |       |          |      |                                                                                                                                                                                                                                                                                                                                                     |          |       |          |       |          |       |          |      |

**Figure S42.** Bond lengths (in Ångstroms) and angles (in degrees) for benzene, silabenzene, and pyridinium ion in the S<sub>0</sub>, S<sub>1</sub>, TS, and CI. Geometries calculated at calculated at SA-CASSCF(6,6)/ANO-RCC-VTZP level.

**Table S22.** Cartesian coordinates of **silabenzene** in the  $S_0$  state and along of puckering coordinate in the  $S_1$  state ( $S_1$  minimum, prefulvenic TS, and  $S_1/S_0$  conical intersection) at SA3-CASSCF(6,6)/ANO-RCC-VTZP level. Absolute energies at MS3-CASPT2(6,6)/ANO-RCC-VTZP level.

|                                                                                                                                                                                                                                                                                                                                                                                                                                                                                                                                                                                                                                                                                                                                                                                                                                                                                                                                                                                                                                                                                                                                                 |             |             |             |            |   |             |             |            |   |            |             |             |   |            |             |             |   |            |             |             |   |            |             |             |   |             |             |             |   |             |            |            |   |            |            |             |   |            |             |             |   |            |             |             |   |            |             |             |                                                                                                                                                                                                                                                                                                                                                                                                                                                                                                                                                                                                                                                                                                                                                                                                                                                                                                                                                                                                                                                                                              |    |             |             |             |   |             |             |            |   |            |            |            |   |            |             |            |   |            |             |            |   |            |             |             |   |             |             |             |   |             |             |            |   |            |            |            |   |            |             |            |   |            |            |            |   |            |             |             |
|-------------------------------------------------------------------------------------------------------------------------------------------------------------------------------------------------------------------------------------------------------------------------------------------------------------------------------------------------------------------------------------------------------------------------------------------------------------------------------------------------------------------------------------------------------------------------------------------------------------------------------------------------------------------------------------------------------------------------------------------------------------------------------------------------------------------------------------------------------------------------------------------------------------------------------------------------------------------------------------------------------------------------------------------------------------------------------------------------------------------------------------------------|-------------|-------------|-------------|------------|---|-------------|-------------|------------|---|------------|-------------|-------------|---|------------|-------------|-------------|---|------------|-------------|-------------|---|------------|-------------|-------------|---|-------------|-------------|-------------|---|-------------|------------|------------|---|------------|------------|-------------|---|------------|-------------|-------------|---|------------|-------------|-------------|---|------------|-------------|-------------|----------------------------------------------------------------------------------------------------------------------------------------------------------------------------------------------------------------------------------------------------------------------------------------------------------------------------------------------------------------------------------------------------------------------------------------------------------------------------------------------------------------------------------------------------------------------------------------------------------------------------------------------------------------------------------------------------------------------------------------------------------------------------------------------------------------------------------------------------------------------------------------------------------------------------------------------------------------------------------------------------------------------------------------------------------------------------------------------|----|-------------|-------------|-------------|---|-------------|-------------|------------|---|------------|------------|------------|---|------------|-------------|------------|---|------------|-------------|------------|---|------------|-------------|-------------|---|-------------|-------------|-------------|---|-------------|-------------|------------|---|------------|------------|------------|---|------------|-------------|------------|---|------------|------------|------------|---|------------|-------------|-------------|
| <p><b>Silabenzene in the <math>S_0</math> state</b></p> <p>E : -483.422567 a.u.</p> <table> <tr><td>Si</td><td>0.00397010</td><td>0.00128188</td><td>0.00195789</td></tr> <tr><td>C</td><td>-0.00225813</td><td>0.00345701</td><td>1.77476131</td></tr> <tr><td>C</td><td>1.24191421</td><td>-0.00136847</td><td>2.40939506</td></tr> <tr><td>C</td><td>2.48440445</td><td>-0.00861271</td><td>1.76314063</td></tr> <tr><td>C</td><td>2.68489642</td><td>-0.01110276</td><td>0.37700159</td></tr> <tr><td>C</td><td>1.67555585</td><td>-0.00810153</td><td>-0.58837460</td></tr> <tr><td>H</td><td>-1.18847088</td><td>0.00402497</td><td>-0.84472580</td></tr> <tr><td>H</td><td>-0.88323459</td><td>0.00907411</td><td>2.38766145</td></tr> <tr><td>H</td><td>1.26140229</td><td>0.00027745</td><td>3.48509970</td></tr> <tr><td>H</td><td>3.35952524</td><td>-0.01120865</td><td>2.38448087</td></tr> <tr><td>H</td><td>3.70688610</td><td>-0.01620554</td><td>0.04078553</td></tr> <tr><td>H</td><td>1.96374994</td><td>-0.00976476</td><td>-1.62218863</td></tr> </table>                                                                  | Si          | 0.00397010  | 0.00128188  | 0.00195789 | C | -0.00225813 | 0.00345701  | 1.77476131 | C | 1.24191421 | -0.00136847 | 2.40939506  | C | 2.48440445 | -0.00861271 | 1.76314063  | C | 2.68489642 | -0.01110276 | 0.37700159  | C | 1.67555585 | -0.00810153 | -0.58837460 | H | -1.18847088 | 0.00402497  | -0.84472580 | H | -0.88323459 | 0.00907411 | 2.38766145 | H | 1.26140229 | 0.00027745 | 3.48509970  | H | 3.35952524 | -0.01120865 | 2.38448087  | H | 3.70688610 | -0.01620554 | 0.04078553  | H | 1.96374994 | -0.00976476 | -1.62218863 | <p><b>Silabenzene in the <math>S_1</math> state</b></p> <p>E : -483.273376 a.u.</p> <table> <tr><td>Si</td><td>-0.09928873</td><td>-0.41136517</td><td>-0.06949249</td></tr> <tr><td>C</td><td>-0.01686147</td><td>-0.09095587</td><td>1.74677910</td></tr> <tr><td>C</td><td>1.25663499</td><td>0.00064969</td><td>2.42294650</td></tr> <tr><td>C</td><td>2.50742218</td><td>0.02546843</td><td>1.77934031</td></tr> <tr><td>C</td><td>2.70258695</td><td>-0.00881777</td><td>0.38648612</td></tr> <tr><td>C</td><td>1.64399689</td><td>-0.10173672</td><td>-0.59235449</td></tr> <tr><td>H</td><td>-1.08872693</td><td>0.43513478</td><td>-0.77584949</td></tr> <tr><td>H</td><td>-0.89107193</td><td>-0.03603946</td><td>2.36884052</td></tr> <tr><td>H</td><td>1.25514786</td><td>0.05688237</td><td>3.49537256</td></tr> <tr><td>H</td><td>3.38030660</td><td>0.09662282</td><td>2.39878537</td></tr> <tr><td>H</td><td>3.71480322</td><td>0.04084847</td><td>0.03122127</td></tr> <tr><td>H</td><td>1.94339137</td><td>-0.05494058</td><td>-1.62308029</td></tr> </table>              | Si | -0.09928873 | -0.41136517 | -0.06949249 | C | -0.01686147 | -0.09095587 | 1.74677910 | C | 1.25663499 | 0.00064969 | 2.42294650 | C | 2.50742218 | 0.02546843  | 1.77934031 | C | 2.70258695 | -0.00881777 | 0.38648612 | C | 1.64399689 | -0.10173672 | -0.59235449 | H | -1.08872693 | 0.43513478  | -0.77584949 | H | -0.89107193 | -0.03603946 | 2.36884052 | H | 1.25514786 | 0.05688237 | 3.49537256 | H | 3.38030660 | 0.09662282  | 2.39878537 | H | 3.71480322 | 0.04084847 | 0.03122127 | H | 1.94339137 | -0.05494058 | -1.62308029 |
| Si                                                                                                                                                                                                                                                                                                                                                                                                                                                                                                                                                                                                                                                                                                                                                                                                                                                                                                                                                                                                                                                                                                                                              | 0.00397010  | 0.00128188  | 0.00195789  |            |   |             |             |            |   |            |             |             |   |            |             |             |   |            |             |             |   |            |             |             |   |             |             |             |   |             |            |            |   |            |            |             |   |            |             |             |   |            |             |             |   |            |             |             |                                                                                                                                                                                                                                                                                                                                                                                                                                                                                                                                                                                                                                                                                                                                                                                                                                                                                                                                                                                                                                                                                              |    |             |             |             |   |             |             |            |   |            |            |            |   |            |             |            |   |            |             |            |   |            |             |             |   |             |             |             |   |             |             |            |   |            |            |            |   |            |             |            |   |            |            |            |   |            |             |             |
| C                                                                                                                                                                                                                                                                                                                                                                                                                                                                                                                                                                                                                                                                                                                                                                                                                                                                                                                                                                                                                                                                                                                                               | -0.00225813 | 0.00345701  | 1.77476131  |            |   |             |             |            |   |            |             |             |   |            |             |             |   |            |             |             |   |            |             |             |   |             |             |             |   |             |            |            |   |            |            |             |   |            |             |             |   |            |             |             |   |            |             |             |                                                                                                                                                                                                                                                                                                                                                                                                                                                                                                                                                                                                                                                                                                                                                                                                                                                                                                                                                                                                                                                                                              |    |             |             |             |   |             |             |            |   |            |            |            |   |            |             |            |   |            |             |            |   |            |             |             |   |             |             |             |   |             |             |            |   |            |            |            |   |            |             |            |   |            |            |            |   |            |             |             |
| C                                                                                                                                                                                                                                                                                                                                                                                                                                                                                                                                                                                                                                                                                                                                                                                                                                                                                                                                                                                                                                                                                                                                               | 1.24191421  | -0.00136847 | 2.40939506  |            |   |             |             |            |   |            |             |             |   |            |             |             |   |            |             |             |   |            |             |             |   |             |             |             |   |             |            |            |   |            |            |             |   |            |             |             |   |            |             |             |   |            |             |             |                                                                                                                                                                                                                                                                                                                                                                                                                                                                                                                                                                                                                                                                                                                                                                                                                                                                                                                                                                                                                                                                                              |    |             |             |             |   |             |             |            |   |            |            |            |   |            |             |            |   |            |             |            |   |            |             |             |   |             |             |             |   |             |             |            |   |            |            |            |   |            |             |            |   |            |            |            |   |            |             |             |
| C                                                                                                                                                                                                                                                                                                                                                                                                                                                                                                                                                                                                                                                                                                                                                                                                                                                                                                                                                                                                                                                                                                                                               | 2.48440445  | -0.00861271 | 1.76314063  |            |   |             |             |            |   |            |             |             |   |            |             |             |   |            |             |             |   |            |             |             |   |             |             |             |   |             |            |            |   |            |            |             |   |            |             |             |   |            |             |             |   |            |             |             |                                                                                                                                                                                                                                                                                                                                                                                                                                                                                                                                                                                                                                                                                                                                                                                                                                                                                                                                                                                                                                                                                              |    |             |             |             |   |             |             |            |   |            |            |            |   |            |             |            |   |            |             |            |   |            |             |             |   |             |             |             |   |             |             |            |   |            |            |            |   |            |             |            |   |            |            |            |   |            |             |             |
| C                                                                                                                                                                                                                                                                                                                                                                                                                                                                                                                                                                                                                                                                                                                                                                                                                                                                                                                                                                                                                                                                                                                                               | 2.68489642  | -0.01110276 | 0.37700159  |            |   |             |             |            |   |            |             |             |   |            |             |             |   |            |             |             |   |            |             |             |   |             |             |             |   |             |            |            |   |            |            |             |   |            |             |             |   |            |             |             |   |            |             |             |                                                                                                                                                                                                                                                                                                                                                                                                                                                                                                                                                                                                                                                                                                                                                                                                                                                                                                                                                                                                                                                                                              |    |             |             |             |   |             |             |            |   |            |            |            |   |            |             |            |   |            |             |            |   |            |             |             |   |             |             |             |   |             |             |            |   |            |            |            |   |            |             |            |   |            |            |            |   |            |             |             |
| C                                                                                                                                                                                                                                                                                                                                                                                                                                                                                                                                                                                                                                                                                                                                                                                                                                                                                                                                                                                                                                                                                                                                               | 1.67555585  | -0.00810153 | -0.58837460 |            |   |             |             |            |   |            |             |             |   |            |             |             |   |            |             |             |   |            |             |             |   |             |             |             |   |             |            |            |   |            |            |             |   |            |             |             |   |            |             |             |   |            |             |             |                                                                                                                                                                                                                                                                                                                                                                                                                                                                                                                                                                                                                                                                                                                                                                                                                                                                                                                                                                                                                                                                                              |    |             |             |             |   |             |             |            |   |            |            |            |   |            |             |            |   |            |             |            |   |            |             |             |   |             |             |             |   |             |             |            |   |            |            |            |   |            |             |            |   |            |            |            |   |            |             |             |
| H                                                                                                                                                                                                                                                                                                                                                                                                                                                                                                                                                                                                                                                                                                                                                                                                                                                                                                                                                                                                                                                                                                                                               | -1.18847088 | 0.00402497  | -0.84472580 |            |   |             |             |            |   |            |             |             |   |            |             |             |   |            |             |             |   |            |             |             |   |             |             |             |   |             |            |            |   |            |            |             |   |            |             |             |   |            |             |             |   |            |             |             |                                                                                                                                                                                                                                                                                                                                                                                                                                                                                                                                                                                                                                                                                                                                                                                                                                                                                                                                                                                                                                                                                              |    |             |             |             |   |             |             |            |   |            |            |            |   |            |             |            |   |            |             |            |   |            |             |             |   |             |             |             |   |             |             |            |   |            |            |            |   |            |             |            |   |            |            |            |   |            |             |             |
| H                                                                                                                                                                                                                                                                                                                                                                                                                                                                                                                                                                                                                                                                                                                                                                                                                                                                                                                                                                                                                                                                                                                                               | -0.88323459 | 0.00907411  | 2.38766145  |            |   |             |             |            |   |            |             |             |   |            |             |             |   |            |             |             |   |            |             |             |   |             |             |             |   |             |            |            |   |            |            |             |   |            |             |             |   |            |             |             |   |            |             |             |                                                                                                                                                                                                                                                                                                                                                                                                                                                                                                                                                                                                                                                                                                                                                                                                                                                                                                                                                                                                                                                                                              |    |             |             |             |   |             |             |            |   |            |            |            |   |            |             |            |   |            |             |            |   |            |             |             |   |             |             |             |   |             |             |            |   |            |            |            |   |            |             |            |   |            |            |            |   |            |             |             |
| H                                                                                                                                                                                                                                                                                                                                                                                                                                                                                                                                                                                                                                                                                                                                                                                                                                                                                                                                                                                                                                                                                                                                               | 1.26140229  | 0.00027745  | 3.48509970  |            |   |             |             |            |   |            |             |             |   |            |             |             |   |            |             |             |   |            |             |             |   |             |             |             |   |             |            |            |   |            |            |             |   |            |             |             |   |            |             |             |   |            |             |             |                                                                                                                                                                                                                                                                                                                                                                                                                                                                                                                                                                                                                                                                                                                                                                                                                                                                                                                                                                                                                                                                                              |    |             |             |             |   |             |             |            |   |            |            |            |   |            |             |            |   |            |             |            |   |            |             |             |   |             |             |             |   |             |             |            |   |            |            |            |   |            |             |            |   |            |            |            |   |            |             |             |
| H                                                                                                                                                                                                                                                                                                                                                                                                                                                                                                                                                                                                                                                                                                                                                                                                                                                                                                                                                                                                                                                                                                                                               | 3.35952524  | -0.01120865 | 2.38448087  |            |   |             |             |            |   |            |             |             |   |            |             |             |   |            |             |             |   |            |             |             |   |             |             |             |   |             |            |            |   |            |            |             |   |            |             |             |   |            |             |             |   |            |             |             |                                                                                                                                                                                                                                                                                                                                                                                                                                                                                                                                                                                                                                                                                                                                                                                                                                                                                                                                                                                                                                                                                              |    |             |             |             |   |             |             |            |   |            |            |            |   |            |             |            |   |            |             |            |   |            |             |             |   |             |             |             |   |             |             |            |   |            |            |            |   |            |             |            |   |            |            |            |   |            |             |             |
| H                                                                                                                                                                                                                                                                                                                                                                                                                                                                                                                                                                                                                                                                                                                                                                                                                                                                                                                                                                                                                                                                                                                                               | 3.70688610  | -0.01620554 | 0.04078553  |            |   |             |             |            |   |            |             |             |   |            |             |             |   |            |             |             |   |            |             |             |   |             |             |             |   |             |            |            |   |            |            |             |   |            |             |             |   |            |             |             |   |            |             |             |                                                                                                                                                                                                                                                                                                                                                                                                                                                                                                                                                                                                                                                                                                                                                                                                                                                                                                                                                                                                                                                                                              |    |             |             |             |   |             |             |            |   |            |            |            |   |            |             |            |   |            |             |            |   |            |             |             |   |             |             |             |   |             |             |            |   |            |            |            |   |            |             |            |   |            |            |            |   |            |             |             |
| H                                                                                                                                                                                                                                                                                                                                                                                                                                                                                                                                                                                                                                                                                                                                                                                                                                                                                                                                                                                                                                                                                                                                               | 1.96374994  | -0.00976476 | -1.62218863 |            |   |             |             |            |   |            |             |             |   |            |             |             |   |            |             |             |   |            |             |             |   |             |             |             |   |             |            |            |   |            |            |             |   |            |             |             |   |            |             |             |   |            |             |             |                                                                                                                                                                                                                                                                                                                                                                                                                                                                                                                                                                                                                                                                                                                                                                                                                                                                                                                                                                                                                                                                                              |    |             |             |             |   |             |             |            |   |            |            |            |   |            |             |            |   |            |             |            |   |            |             |             |   |             |             |             |   |             |             |            |   |            |            |            |   |            |             |            |   |            |            |            |   |            |             |             |
| Si                                                                                                                                                                                                                                                                                                                                                                                                                                                                                                                                                                                                                                                                                                                                                                                                                                                                                                                                                                                                                                                                                                                                              | -0.09928873 | -0.41136517 | -0.06949249 |            |   |             |             |            |   |            |             |             |   |            |             |             |   |            |             |             |   |            |             |             |   |             |             |             |   |             |            |            |   |            |            |             |   |            |             |             |   |            |             |             |   |            |             |             |                                                                                                                                                                                                                                                                                                                                                                                                                                                                                                                                                                                                                                                                                                                                                                                                                                                                                                                                                                                                                                                                                              |    |             |             |             |   |             |             |            |   |            |            |            |   |            |             |            |   |            |             |            |   |            |             |             |   |             |             |             |   |             |             |            |   |            |            |            |   |            |             |            |   |            |            |            |   |            |             |             |
| C                                                                                                                                                                                                                                                                                                                                                                                                                                                                                                                                                                                                                                                                                                                                                                                                                                                                                                                                                                                                                                                                                                                                               | -0.01686147 | -0.09095587 | 1.74677910  |            |   |             |             |            |   |            |             |             |   |            |             |             |   |            |             |             |   |            |             |             |   |             |             |             |   |             |            |            |   |            |            |             |   |            |             |             |   |            |             |             |   |            |             |             |                                                                                                                                                                                                                                                                                                                                                                                                                                                                                                                                                                                                                                                                                                                                                                                                                                                                                                                                                                                                                                                                                              |    |             |             |             |   |             |             |            |   |            |            |            |   |            |             |            |   |            |             |            |   |            |             |             |   |             |             |             |   |             |             |            |   |            |            |            |   |            |             |            |   |            |            |            |   |            |             |             |
| C                                                                                                                                                                                                                                                                                                                                                                                                                                                                                                                                                                                                                                                                                                                                                                                                                                                                                                                                                                                                                                                                                                                                               | 1.25663499  | 0.00064969  | 2.42294650  |            |   |             |             |            |   |            |             |             |   |            |             |             |   |            |             |             |   |            |             |             |   |             |             |             |   |             |            |            |   |            |            |             |   |            |             |             |   |            |             |             |   |            |             |             |                                                                                                                                                                                                                                                                                                                                                                                                                                                                                                                                                                                                                                                                                                                                                                                                                                                                                                                                                                                                                                                                                              |    |             |             |             |   |             |             |            |   |            |            |            |   |            |             |            |   |            |             |            |   |            |             |             |   |             |             |             |   |             |             |            |   |            |            |            |   |            |             |            |   |            |            |            |   |            |             |             |
| C                                                                                                                                                                                                                                                                                                                                                                                                                                                                                                                                                                                                                                                                                                                                                                                                                                                                                                                                                                                                                                                                                                                                               | 2.50742218  | 0.02546843  | 1.77934031  |            |   |             |             |            |   |            |             |             |   |            |             |             |   |            |             |             |   |            |             |             |   |             |             |             |   |             |            |            |   |            |            |             |   |            |             |             |   |            |             |             |   |            |             |             |                                                                                                                                                                                                                                                                                                                                                                                                                                                                                                                                                                                                                                                                                                                                                                                                                                                                                                                                                                                                                                                                                              |    |             |             |             |   |             |             |            |   |            |            |            |   |            |             |            |   |            |             |            |   |            |             |             |   |             |             |             |   |             |             |            |   |            |            |            |   |            |             |            |   |            |            |            |   |            |             |             |
| C                                                                                                                                                                                                                                                                                                                                                                                                                                                                                                                                                                                                                                                                                                                                                                                                                                                                                                                                                                                                                                                                                                                                               | 2.70258695  | -0.00881777 | 0.38648612  |            |   |             |             |            |   |            |             |             |   |            |             |             |   |            |             |             |   |            |             |             |   |             |             |             |   |             |            |            |   |            |            |             |   |            |             |             |   |            |             |             |   |            |             |             |                                                                                                                                                                                                                                                                                                                                                                                                                                                                                                                                                                                                                                                                                                                                                                                                                                                                                                                                                                                                                                                                                              |    |             |             |             |   |             |             |            |   |            |            |            |   |            |             |            |   |            |             |            |   |            |             |             |   |             |             |             |   |             |             |            |   |            |            |            |   |            |             |            |   |            |            |            |   |            |             |             |
| C                                                                                                                                                                                                                                                                                                                                                                                                                                                                                                                                                                                                                                                                                                                                                                                                                                                                                                                                                                                                                                                                                                                                               | 1.64399689  | -0.10173672 | -0.59235449 |            |   |             |             |            |   |            |             |             |   |            |             |             |   |            |             |             |   |            |             |             |   |             |             |             |   |             |            |            |   |            |            |             |   |            |             |             |   |            |             |             |   |            |             |             |                                                                                                                                                                                                                                                                                                                                                                                                                                                                                                                                                                                                                                                                                                                                                                                                                                                                                                                                                                                                                                                                                              |    |             |             |             |   |             |             |            |   |            |            |            |   |            |             |            |   |            |             |            |   |            |             |             |   |             |             |             |   |             |             |            |   |            |            |            |   |            |             |            |   |            |            |            |   |            |             |             |
| H                                                                                                                                                                                                                                                                                                                                                                                                                                                                                                                                                                                                                                                                                                                                                                                                                                                                                                                                                                                                                                                                                                                                               | -1.08872693 | 0.43513478  | -0.77584949 |            |   |             |             |            |   |            |             |             |   |            |             |             |   |            |             |             |   |            |             |             |   |             |             |             |   |             |            |            |   |            |            |             |   |            |             |             |   |            |             |             |   |            |             |             |                                                                                                                                                                                                                                                                                                                                                                                                                                                                                                                                                                                                                                                                                                                                                                                                                                                                                                                                                                                                                                                                                              |    |             |             |             |   |             |             |            |   |            |            |            |   |            |             |            |   |            |             |            |   |            |             |             |   |             |             |             |   |             |             |            |   |            |            |            |   |            |             |            |   |            |            |            |   |            |             |             |
| H                                                                                                                                                                                                                                                                                                                                                                                                                                                                                                                                                                                                                                                                                                                                                                                                                                                                                                                                                                                                                                                                                                                                               | -0.89107193 | -0.03603946 | 2.36884052  |            |   |             |             |            |   |            |             |             |   |            |             |             |   |            |             |             |   |            |             |             |   |             |             |             |   |             |            |            |   |            |            |             |   |            |             |             |   |            |             |             |   |            |             |             |                                                                                                                                                                                                                                                                                                                                                                                                                                                                                                                                                                                                                                                                                                                                                                                                                                                                                                                                                                                                                                                                                              |    |             |             |             |   |             |             |            |   |            |            |            |   |            |             |            |   |            |             |            |   |            |             |             |   |             |             |             |   |             |             |            |   |            |            |            |   |            |             |            |   |            |            |            |   |            |             |             |
| H                                                                                                                                                                                                                                                                                                                                                                                                                                                                                                                                                                                                                                                                                                                                                                                                                                                                                                                                                                                                                                                                                                                                               | 1.25514786  | 0.05688237  | 3.49537256  |            |   |             |             |            |   |            |             |             |   |            |             |             |   |            |             |             |   |            |             |             |   |             |             |             |   |             |            |            |   |            |            |             |   |            |             |             |   |            |             |             |   |            |             |             |                                                                                                                                                                                                                                                                                                                                                                                                                                                                                                                                                                                                                                                                                                                                                                                                                                                                                                                                                                                                                                                                                              |    |             |             |             |   |             |             |            |   |            |            |            |   |            |             |            |   |            |             |            |   |            |             |             |   |             |             |             |   |             |             |            |   |            |            |            |   |            |             |            |   |            |            |            |   |            |             |             |
| H                                                                                                                                                                                                                                                                                                                                                                                                                                                                                                                                                                                                                                                                                                                                                                                                                                                                                                                                                                                                                                                                                                                                               | 3.38030660  | 0.09662282  | 2.39878537  |            |   |             |             |            |   |            |             |             |   |            |             |             |   |            |             |             |   |            |             |             |   |             |             |             |   |             |            |            |   |            |            |             |   |            |             |             |   |            |             |             |   |            |             |             |                                                                                                                                                                                                                                                                                                                                                                                                                                                                                                                                                                                                                                                                                                                                                                                                                                                                                                                                                                                                                                                                                              |    |             |             |             |   |             |             |            |   |            |            |            |   |            |             |            |   |            |             |            |   |            |             |             |   |             |             |             |   |             |             |            |   |            |            |            |   |            |             |            |   |            |            |            |   |            |             |             |
| H                                                                                                                                                                                                                                                                                                                                                                                                                                                                                                                                                                                                                                                                                                                                                                                                                                                                                                                                                                                                                                                                                                                                               | 3.71480322  | 0.04084847  | 0.03122127  |            |   |             |             |            |   |            |             |             |   |            |             |             |   |            |             |             |   |            |             |             |   |             |             |             |   |             |            |            |   |            |            |             |   |            |             |             |   |            |             |             |   |            |             |             |                                                                                                                                                                                                                                                                                                                                                                                                                                                                                                                                                                                                                                                                                                                                                                                                                                                                                                                                                                                                                                                                                              |    |             |             |             |   |             |             |            |   |            |            |            |   |            |             |            |   |            |             |            |   |            |             |             |   |             |             |             |   |             |             |            |   |            |            |            |   |            |             |            |   |            |            |            |   |            |             |             |
| H                                                                                                                                                                                                                                                                                                                                                                                                                                                                                                                                                                                                                                                                                                                                                                                                                                                                                                                                                                                                                                                                                                                                               | 1.94339137  | -0.05494058 | -1.62308029 |            |   |             |             |            |   |            |             |             |   |            |             |             |   |            |             |             |   |            |             |             |   |             |             |             |   |             |            |            |   |            |            |             |   |            |             |             |   |            |             |             |   |            |             |             |                                                                                                                                                                                                                                                                                                                                                                                                                                                                                                                                                                                                                                                                                                                                                                                                                                                                                                                                                                                                                                                                                              |    |             |             |             |   |             |             |            |   |            |            |            |   |            |             |            |   |            |             |            |   |            |             |             |   |             |             |             |   |             |             |            |   |            |            |            |   |            |             |            |   |            |            |            |   |            |             |             |
| <p><b>Silabenzene in the TS of <math>S_1</math> state</b></p> <p>E : -483.278886 a.u.</p> <table> <tr><td>Si</td><td>0.21950127</td><td>-1.28276844</td><td>0.06046346</td></tr> <tr><td>C</td><td>0.18656828</td><td>-0.13053037</td><td>1.48239935</td></tr> <tr><td>C</td><td>1.33058944</td><td>0.00136183</td><td>2.37228464</td></tr> <tr><td>C</td><td>2.62452699</td><td>-0.04504741</td><td>1.86143874</td></tr> <tr><td>C</td><td>2.77390745</td><td>-0.04623444</td><td>0.47768201</td></tr> <tr><td>C</td><td>1.60885117</td><td>-0.17736998</td><td>-0.38477970</td></tr> <tr><td>H</td><td>-0.94726563</td><td>-1.08323695</td><td>-0.83334050</td></tr> <tr><td>H</td><td>-0.64125389</td><td>0.53968151</td><td>1.64732963</td></tr> <tr><td>H</td><td>1.16103478</td><td>0.15935570</td><td>3.42084923</td></tr> <tr><td>H</td><td>3.47721265</td><td>0.00116982</td><td>2.50981670</td></tr> <tr><td>H</td><td>3.74315236</td><td>0.07417888</td><td>0.03129551</td></tr> <tr><td>H</td><td>1.56393321</td><td>0.46711659</td><td>-1.24751040</td></tr> </table> <p>Imaginary frequency : 186.9i cm<sup>-1</sup></p>          | Si          | 0.21950127  | -1.28276844 | 0.06046346 | C | 0.18656828  | -0.13053037 | 1.48239935 | C | 1.33058944 | 0.00136183  | 2.37228464  | C | 2.62452699 | -0.04504741 | 1.86143874  | C | 2.77390745 | -0.04623444 | 0.47768201  | C | 1.60885117 | -0.17736998 | -0.38477970 | H | -0.94726563 | -1.08323695 | -0.83334050 | H | -0.64125389 | 0.53968151 | 1.64732963 | H | 1.16103478 | 0.15935570 | 3.42084923  | H | 3.47721265 | 0.00116982  | 2.50981670  | H | 3.74315236 | 0.07417888  | 0.03129551  | H | 1.56393321 | 0.46711659  | -1.24751040 | <p><b>Silabenzene in <math>S_1/S_0</math> conical intersection</b></p> <p>E : -483.279362 a.u.</p> <table> <tr><td>Si</td><td>0.22182186</td><td>-1.29194077</td><td>0.06248509</td></tr> <tr><td>C</td><td>0.19511703</td><td>-0.12574054</td><td>1.47120995</td></tr> <tr><td>C</td><td>1.33280650</td><td>0.00109195</td><td>2.37158183</td></tr> <tr><td>C</td><td>2.62779990</td><td>-0.04715760</td><td>1.86402745</td></tr> <tr><td>C</td><td>2.77377506</td><td>-0.04639221</td><td>0.47996336</td></tr> <tr><td>C</td><td>1.60051817</td><td>-0.17204432</td><td>-0.37371852</td></tr> <tr><td>H</td><td>-0.94579570</td><td>-1.10108554</td><td>-0.83175428</td></tr> <tr><td>H</td><td>-0.62656528</td><td>0.55566450</td><td>1.62112295</td></tr> <tr><td>H</td><td>1.15709959</td><td>0.15642319</td><td>3.41937299</td></tr> <tr><td>H</td><td>3.48061191</td><td>-0.00662232</td><td>2.51265197</td></tr> <tr><td>H</td><td>3.74056940</td><td>0.07130412</td><td>0.02794220</td></tr> <tr><td>H</td><td>1.54299964</td><td>0.48417629</td><td>-1.22695630</td></tr> </table> | Si | 0.22182186  | -1.29194077 | 0.06248509  | C | 0.19511703  | -0.12574054 | 1.47120995 | C | 1.33280650 | 0.00109195 | 2.37158183 | C | 2.62779990 | -0.04715760 | 1.86402745 | C | 2.77377506 | -0.04639221 | 0.47996336 | C | 1.60051817 | -0.17204432 | -0.37371852 | H | -0.94579570 | -1.10108554 | -0.83175428 | H | -0.62656528 | 0.55566450  | 1.62112295 | H | 1.15709959 | 0.15642319 | 3.41937299 | H | 3.48061191 | -0.00662232 | 2.51265197 | H | 3.74056940 | 0.07130412 | 0.02794220 | H | 1.54299964 | 0.48417629  | -1.22695630 |
| Si                                                                                                                                                                                                                                                                                                                                                                                                                                                                                                                                                                                                                                                                                                                                                                                                                                                                                                                                                                                                                                                                                                                                              | 0.21950127  | -1.28276844 | 0.06046346  |            |   |             |             |            |   |            |             |             |   |            |             |             |   |            |             |             |   |            |             |             |   |             |             |             |   |             |            |            |   |            |            |             |   |            |             |             |   |            |             |             |   |            |             |             |                                                                                                                                                                                                                                                                                                                                                                                                                                                                                                                                                                                                                                                                                                                                                                                                                                                                                                                                                                                                                                                                                              |    |             |             |             |   |             |             |            |   |            |            |            |   |            |             |            |   |            |             |            |   |            |             |             |   |             |             |             |   |             |             |            |   |            |            |            |   |            |             |            |   |            |            |            |   |            |             |             |
| C                                                                                                                                                                                                                                                                                                                                                                                                                                                                                                                                                                                                                                                                                                                                                                                                                                                                                                                                                                                                                                                                                                                                               | 0.18656828  | -0.13053037 | 1.48239935  |            |   |             |             |            |   |            |             |             |   |            |             |             |   |            |             |             |   |            |             |             |   |             |             |             |   |             |            |            |   |            |            |             |   |            |             |             |   |            |             |             |   |            |             |             |                                                                                                                                                                                                                                                                                                                                                                                                                                                                                                                                                                                                                                                                                                                                                                                                                                                                                                                                                                                                                                                                                              |    |             |             |             |   |             |             |            |   |            |            |            |   |            |             |            |   |            |             |            |   |            |             |             |   |             |             |             |   |             |             |            |   |            |            |            |   |            |             |            |   |            |            |            |   |            |             |             |
| C                                                                                                                                                                                                                                                                                                                                                                                                                                                                                                                                                                                                                                                                                                                                                                                                                                                                                                                                                                                                                                                                                                                                               | 1.33058944  | 0.00136183  | 2.37228464  |            |   |             |             |            |   |            |             |             |   |            |             |             |   |            |             |             |   |            |             |             |   |             |             |             |   |             |            |            |   |            |            |             |   |            |             |             |   |            |             |             |   |            |             |             |                                                                                                                                                                                                                                                                                                                                                                                                                                                                                                                                                                                                                                                                                                                                                                                                                                                                                                                                                                                                                                                                                              |    |             |             |             |   |             |             |            |   |            |            |            |   |            |             |            |   |            |             |            |   |            |             |             |   |             |             |             |   |             |             |            |   |            |            |            |   |            |             |            |   |            |            |            |   |            |             |             |
| C                                                                                                                                                                                                                                                                                                                                                                                                                                                                                                                                                                                                                                                                                                                                                                                                                                                                                                                                                                                                                                                                                                                                               | 2.62452699  | -0.04504741 | 1.86143874  |            |   |             |             |            |   |            |             |             |   |            |             |             |   |            |             |             |   |            |             |             |   |             |             |             |   |             |            |            |   |            |            |             |   |            |             |             |   |            |             |             |   |            |             |             |                                                                                                                                                                                                                                                                                                                                                                                                                                                                                                                                                                                                                                                                                                                                                                                                                                                                                                                                                                                                                                                                                              |    |             |             |             |   |             |             |            |   |            |            |            |   |            |             |            |   |            |             |            |   |            |             |             |   |             |             |             |   |             |             |            |   |            |            |            |   |            |             |            |   |            |            |            |   |            |             |             |
| C                                                                                                                                                                                                                                                                                                                                                                                                                                                                                                                                                                                                                                                                                                                                                                                                                                                                                                                                                                                                                                                                                                                                               | 2.77390745  | -0.04623444 | 0.47768201  |            |   |             |             |            |   |            |             |             |   |            |             |             |   |            |             |             |   |            |             |             |   |             |             |             |   |             |            |            |   |            |            |             |   |            |             |             |   |            |             |             |   |            |             |             |                                                                                                                                                                                                                                                                                                                                                                                                                                                                                                                                                                                                                                                                                                                                                                                                                                                                                                                                                                                                                                                                                              |    |             |             |             |   |             |             |            |   |            |            |            |   |            |             |            |   |            |             |            |   |            |             |             |   |             |             |             |   |             |             |            |   |            |            |            |   |            |             |            |   |            |            |            |   |            |             |             |
| C                                                                                                                                                                                                                                                                                                                                                                                                                                                                                                                                                                                                                                                                                                                                                                                                                                                                                                                                                                                                                                                                                                                                               | 1.60885117  | -0.17736998 | -0.38477970 |            |   |             |             |            |   |            |             |             |   |            |             |             |   |            |             |             |   |            |             |             |   |             |             |             |   |             |            |            |   |            |            |             |   |            |             |             |   |            |             |             |   |            |             |             |                                                                                                                                                                                                                                                                                                                                                                                                                                                                                                                                                                                                                                                                                                                                                                                                                                                                                                                                                                                                                                                                                              |    |             |             |             |   |             |             |            |   |            |            |            |   |            |             |            |   |            |             |            |   |            |             |             |   |             |             |             |   |             |             |            |   |            |            |            |   |            |             |            |   |            |            |            |   |            |             |             |
| H                                                                                                                                                                                                                                                                                                                                                                                                                                                                                                                                                                                                                                                                                                                                                                                                                                                                                                                                                                                                                                                                                                                                               | -0.94726563 | -1.08323695 | -0.83334050 |            |   |             |             |            |   |            |             |             |   |            |             |             |   |            |             |             |   |            |             |             |   |             |             |             |   |             |            |            |   |            |            |             |   |            |             |             |   |            |             |             |   |            |             |             |                                                                                                                                                                                                                                                                                                                                                                                                                                                                                                                                                                                                                                                                                                                                                                                                                                                                                                                                                                                                                                                                                              |    |             |             |             |   |             |             |            |   |            |            |            |   |            |             |            |   |            |             |            |   |            |             |             |   |             |             |             |   |             |             |            |   |            |            |            |   |            |             |            |   |            |            |            |   |            |             |             |
| H                                                                                                                                                                                                                                                                                                                                                                                                                                                                                                                                                                                                                                                                                                                                                                                                                                                                                                                                                                                                                                                                                                                                               | -0.64125389 | 0.53968151  | 1.64732963  |            |   |             |             |            |   |            |             |             |   |            |             |             |   |            |             |             |   |            |             |             |   |             |             |             |   |             |            |            |   |            |            |             |   |            |             |             |   |            |             |             |   |            |             |             |                                                                                                                                                                                                                                                                                                                                                                                                                                                                                                                                                                                                                                                                                                                                                                                                                                                                                                                                                                                                                                                                                              |    |             |             |             |   |             |             |            |   |            |            |            |   |            |             |            |   |            |             |            |   |            |             |             |   |             |             |             |   |             |             |            |   |            |            |            |   |            |             |            |   |            |            |            |   |            |             |             |
| H                                                                                                                                                                                                                                                                                                                                                                                                                                                                                                                                                                                                                                                                                                                                                                                                                                                                                                                                                                                                                                                                                                                                               | 1.16103478  | 0.15935570  | 3.42084923  |            |   |             |             |            |   |            |             |             |   |            |             |             |   |            |             |             |   |            |             |             |   |             |             |             |   |             |            |            |   |            |            |             |   |            |             |             |   |            |             |             |   |            |             |             |                                                                                                                                                                                                                                                                                                                                                                                                                                                                                                                                                                                                                                                                                                                                                                                                                                                                                                                                                                                                                                                                                              |    |             |             |             |   |             |             |            |   |            |            |            |   |            |             |            |   |            |             |            |   |            |             |             |   |             |             |             |   |             |             |            |   |            |            |            |   |            |             |            |   |            |            |            |   |            |             |             |
| H                                                                                                                                                                                                                                                                                                                                                                                                                                                                                                                                                                                                                                                                                                                                                                                                                                                                                                                                                                                                                                                                                                                                               | 3.47721265  | 0.00116982  | 2.50981670  |            |   |             |             |            |   |            |             |             |   |            |             |             |   |            |             |             |   |            |             |             |   |             |             |             |   |             |            |            |   |            |            |             |   |            |             |             |   |            |             |             |   |            |             |             |                                                                                                                                                                                                                                                                                                                                                                                                                                                                                                                                                                                                                                                                                                                                                                                                                                                                                                                                                                                                                                                                                              |    |             |             |             |   |             |             |            |   |            |            |            |   |            |             |            |   |            |             |            |   |            |             |             |   |             |             |             |   |             |             |            |   |            |            |            |   |            |             |            |   |            |            |            |   |            |             |             |
| H                                                                                                                                                                                                                                                                                                                                                                                                                                                                                                                                                                                                                                                                                                                                                                                                                                                                                                                                                                                                                                                                                                                                               | 3.74315236  | 0.07417888  | 0.03129551  |            |   |             |             |            |   |            |             |             |   |            |             |             |   |            |             |             |   |            |             |             |   |             |             |             |   |             |            |            |   |            |            |             |   |            |             |             |   |            |             |             |   |            |             |             |                                                                                                                                                                                                                                                                                                                                                                                                                                                                                                                                                                                                                                                                                                                                                                                                                                                                                                                                                                                                                                                                                              |    |             |             |             |   |             |             |            |   |            |            |            |   |            |             |            |   |            |             |            |   |            |             |             |   |             |             |             |   |             |             |            |   |            |            |            |   |            |             |            |   |            |            |            |   |            |             |             |
| H                                                                                                                                                                                                                                                                                                                                                                                                                                                                                                                                                                                                                                                                                                                                                                                                                                                                                                                                                                                                                                                                                                                                               | 1.56393321  | 0.46711659  | -1.24751040 |            |   |             |             |            |   |            |             |             |   |            |             |             |   |            |             |             |   |            |             |             |   |             |             |             |   |             |            |            |   |            |            |             |   |            |             |             |   |            |             |             |   |            |             |             |                                                                                                                                                                                                                                                                                                                                                                                                                                                                                                                                                                                                                                                                                                                                                                                                                                                                                                                                                                                                                                                                                              |    |             |             |             |   |             |             |            |   |            |            |            |   |            |             |            |   |            |             |            |   |            |             |             |   |             |             |             |   |             |             |            |   |            |            |            |   |            |             |            |   |            |            |            |   |            |             |             |
| Si                                                                                                                                                                                                                                                                                                                                                                                                                                                                                                                                                                                                                                                                                                                                                                                                                                                                                                                                                                                                                                                                                                                                              | 0.22182186  | -1.29194077 | 0.06248509  |            |   |             |             |            |   |            |             |             |   |            |             |             |   |            |             |             |   |            |             |             |   |             |             |             |   |             |            |            |   |            |            |             |   |            |             |             |   |            |             |             |   |            |             |             |                                                                                                                                                                                                                                                                                                                                                                                                                                                                                                                                                                                                                                                                                                                                                                                                                                                                                                                                                                                                                                                                                              |    |             |             |             |   |             |             |            |   |            |            |            |   |            |             |            |   |            |             |            |   |            |             |             |   |             |             |             |   |             |             |            |   |            |            |            |   |            |             |            |   |            |            |            |   |            |             |             |
| C                                                                                                                                                                                                                                                                                                                                                                                                                                                                                                                                                                                                                                                                                                                                                                                                                                                                                                                                                                                                                                                                                                                                               | 0.19511703  | -0.12574054 | 1.47120995  |            |   |             |             |            |   |            |             |             |   |            |             |             |   |            |             |             |   |            |             |             |   |             |             |             |   |             |            |            |   |            |            |             |   |            |             |             |   |            |             |             |   |            |             |             |                                                                                                                                                                                                                                                                                                                                                                                                                                                                                                                                                                                                                                                                                                                                                                                                                                                                                                                                                                                                                                                                                              |    |             |             |             |   |             |             |            |   |            |            |            |   |            |             |            |   |            |             |            |   |            |             |             |   |             |             |             |   |             |             |            |   |            |            |            |   |            |             |            |   |            |            |            |   |            |             |             |
| C                                                                                                                                                                                                                                                                                                                                                                                                                                                                                                                                                                                                                                                                                                                                                                                                                                                                                                                                                                                                                                                                                                                                               | 1.33280650  | 0.00109195  | 2.37158183  |            |   |             |             |            |   |            |             |             |   |            |             |             |   |            |             |             |   |            |             |             |   |             |             |             |   |             |            |            |   |            |            |             |   |            |             |             |   |            |             |             |   |            |             |             |                                                                                                                                                                                                                                                                                                                                                                                                                                                                                                                                                                                                                                                                                                                                                                                                                                                                                                                                                                                                                                                                                              |    |             |             |             |   |             |             |            |   |            |            |            |   |            |             |            |   |            |             |            |   |            |             |             |   |             |             |             |   |             |             |            |   |            |            |            |   |            |             |            |   |            |            |            |   |            |             |             |
| C                                                                                                                                                                                                                                                                                                                                                                                                                                                                                                                                                                                                                                                                                                                                                                                                                                                                                                                                                                                                                                                                                                                                               | 2.62779990  | -0.04715760 | 1.86402745  |            |   |             |             |            |   |            |             |             |   |            |             |             |   |            |             |             |   |            |             |             |   |             |             |             |   |             |            |            |   |            |            |             |   |            |             |             |   |            |             |             |   |            |             |             |                                                                                                                                                                                                                                                                                                                                                                                                                                                                                                                                                                                                                                                                                                                                                                                                                                                                                                                                                                                                                                                                                              |    |             |             |             |   |             |             |            |   |            |            |            |   |            |             |            |   |            |             |            |   |            |             |             |   |             |             |             |   |             |             |            |   |            |            |            |   |            |             |            |   |            |            |            |   |            |             |             |
| C                                                                                                                                                                                                                                                                                                                                                                                                                                                                                                                                                                                                                                                                                                                                                                                                                                                                                                                                                                                                                                                                                                                                               | 2.77377506  | -0.04639221 | 0.47996336  |            |   |             |             |            |   |            |             |             |   |            |             |             |   |            |             |             |   |            |             |             |   |             |             |             |   |             |            |            |   |            |            |             |   |            |             |             |   |            |             |             |   |            |             |             |                                                                                                                                                                                                                                                                                                                                                                                                                                                                                                                                                                                                                                                                                                                                                                                                                                                                                                                                                                                                                                                                                              |    |             |             |             |   |             |             |            |   |            |            |            |   |            |             |            |   |            |             |            |   |            |             |             |   |             |             |             |   |             |             |            |   |            |            |            |   |            |             |            |   |            |            |            |   |            |             |             |
| C                                                                                                                                                                                                                                                                                                                                                                                                                                                                                                                                                                                                                                                                                                                                                                                                                                                                                                                                                                                                                                                                                                                                               | 1.60051817  | -0.17204432 | -0.37371852 |            |   |             |             |            |   |            |             |             |   |            |             |             |   |            |             |             |   |            |             |             |   |             |             |             |   |             |            |            |   |            |            |             |   |            |             |             |   |            |             |             |   |            |             |             |                                                                                                                                                                                                                                                                                                                                                                                                                                                                                                                                                                                                                                                                                                                                                                                                                                                                                                                                                                                                                                                                                              |    |             |             |             |   |             |             |            |   |            |            |            |   |            |             |            |   |            |             |            |   |            |             |             |   |             |             |             |   |             |             |            |   |            |            |            |   |            |             |            |   |            |            |            |   |            |             |             |
| H                                                                                                                                                                                                                                                                                                                                                                                                                                                                                                                                                                                                                                                                                                                                                                                                                                                                                                                                                                                                                                                                                                                                               | -0.94579570 | -1.10108554 | -0.83175428 |            |   |             |             |            |   |            |             |             |   |            |             |             |   |            |             |             |   |            |             |             |   |             |             |             |   |             |            |            |   |            |            |             |   |            |             |             |   |            |             |             |   |            |             |             |                                                                                                                                                                                                                                                                                                                                                                                                                                                                                                                                                                                                                                                                                                                                                                                                                                                                                                                                                                                                                                                                                              |    |             |             |             |   |             |             |            |   |            |            |            |   |            |             |            |   |            |             |            |   |            |             |             |   |             |             |             |   |             |             |            |   |            |            |            |   |            |             |            |   |            |            |            |   |            |             |             |
| H                                                                                                                                                                                                                                                                                                                                                                                                                                                                                                                                                                                                                                                                                                                                                                                                                                                                                                                                                                                                                                                                                                                                               | -0.62656528 | 0.55566450  | 1.62112295  |            |   |             |             |            |   |            |             |             |   |            |             |             |   |            |             |             |   |            |             |             |   |             |             |             |   |             |            |            |   |            |            |             |   |            |             |             |   |            |             |             |   |            |             |             |                                                                                                                                                                                                                                                                                                                                                                                                                                                                                                                                                                                                                                                                                                                                                                                                                                                                                                                                                                                                                                                                                              |    |             |             |             |   |             |             |            |   |            |            |            |   |            |             |            |   |            |             |            |   |            |             |             |   |             |             |             |   |             |             |            |   |            |            |            |   |            |             |            |   |            |            |            |   |            |             |             |
| H                                                                                                                                                                                                                                                                                                                                                                                                                                                                                                                                                                                                                                                                                                                                                                                                                                                                                                                                                                                                                                                                                                                                               | 1.15709959  | 0.15642319  | 3.41937299  |            |   |             |             |            |   |            |             |             |   |            |             |             |   |            |             |             |   |            |             |             |   |             |             |             |   |             |            |            |   |            |            |             |   |            |             |             |   |            |             |             |   |            |             |             |                                                                                                                                                                                                                                                                                                                                                                                                                                                                                                                                                                                                                                                                                                                                                                                                                                                                                                                                                                                                                                                                                              |    |             |             |             |   |             |             |            |   |            |            |            |   |            |             |            |   |            |             |            |   |            |             |             |   |             |             |             |   |             |             |            |   |            |            |            |   |            |             |            |   |            |            |            |   |            |             |             |
| H                                                                                                                                                                                                                                                                                                                                                                                                                                                                                                                                                                                                                                                                                                                                                                                                                                                                                                                                                                                                                                                                                                                                               | 3.48061191  | -0.00662232 | 2.51265197  |            |   |             |             |            |   |            |             |             |   |            |             |             |   |            |             |             |   |            |             |             |   |             |             |             |   |             |            |            |   |            |            |             |   |            |             |             |   |            |             |             |   |            |             |             |                                                                                                                                                                                                                                                                                                                                                                                                                                                                                                                                                                                                                                                                                                                                                                                                                                                                                                                                                                                                                                                                                              |    |             |             |             |   |             |             |            |   |            |            |            |   |            |             |            |   |            |             |            |   |            |             |             |   |             |             |             |   |             |             |            |   |            |            |            |   |            |             |            |   |            |            |            |   |            |             |             |
| H                                                                                                                                                                                                                                                                                                                                                                                                                                                                                                                                                                                                                                                                                                                                                                                                                                                                                                                                                                                                                                                                                                                                               | 3.74056940  | 0.07130412  | 0.02794220  |            |   |             |             |            |   |            |             |             |   |            |             |             |   |            |             |             |   |            |             |             |   |             |             |             |   |             |            |            |   |            |            |             |   |            |             |             |   |            |             |             |   |            |             |             |                                                                                                                                                                                                                                                                                                                                                                                                                                                                                                                                                                                                                                                                                                                                                                                                                                                                                                                                                                                                                                                                                              |    |             |             |             |   |             |             |            |   |            |            |            |   |            |             |            |   |            |             |            |   |            |             |             |   |             |             |             |   |             |             |            |   |            |            |            |   |            |             |            |   |            |            |            |   |            |             |             |
| H                                                                                                                                                                                                                                                                                                                                                                                                                                                                                                                                                                                                                                                                                                                                                                                                                                                                                                                                                                                                                                                                                                                                               | 1.54299964  | 0.48417629  | -1.22695630 |            |   |             |             |            |   |            |             |             |   |            |             |             |   |            |             |             |   |            |             |             |   |             |             |             |   |             |            |            |   |            |            |             |   |            |             |             |   |            |             |             |   |            |             |             |                                                                                                                                                                                                                                                                                                                                                                                                                                                                                                                                                                                                                                                                                                                                                                                                                                                                                                                                                                                                                                                                                              |    |             |             |             |   |             |             |            |   |            |            |            |   |            |             |            |   |            |             |            |   |            |             |             |   |             |             |             |   |             |             |            |   |            |            |            |   |            |             |            |   |            |            |            |   |            |             |             |
| <p><b>Silabenzene in the <math>S_1</math> state <math>C_{2v}</math> symmetric</b><br/>(optimized at B3LYP/6-311+G(d,p))</p> <p>E : -483.269465 a.u.</p> <table> <tr><td>Si</td><td>0.00000000</td><td>0.00000000</td><td>1.39208000</td></tr> <tr><td>C</td><td>0.00000000</td><td>1.44533000</td><td>0.36688000</td></tr> <tr><td>C</td><td>0.00000000</td><td>1.24602000</td><td>-1.01823000</td></tr> <tr><td>C</td><td>0.00000000</td><td>0.00000000</td><td>-1.65868000</td></tr> <tr><td>C</td><td>0.00000000</td><td>-1.24602000</td><td>-1.01823000</td></tr> <tr><td>C</td><td>0.00000000</td><td>-1.44533000</td><td>0.36688000</td></tr> <tr><td>H</td><td>0.00000000</td><td>0.00000000</td><td>2.85562000</td></tr> <tr><td>H</td><td>0.00000000</td><td>2.45641000</td><td>0.73413000</td></tr> <tr><td>H</td><td>0.00000000</td><td>2.11588000</td><td>-1.65512000</td></tr> <tr><td>H</td><td>0.00000000</td><td>0.00000000</td><td>-2.73452000</td></tr> <tr><td>H</td><td>0.00000000</td><td>-2.11588000</td><td>-1.65512000</td></tr> <tr><td>H</td><td>0.00000000</td><td>-2.45641000</td><td>0.73413000</td></tr> </table> | Si          | 0.00000000  | 0.00000000  | 1.39208000 | C | 0.00000000  | 1.44533000  | 0.36688000 | C | 0.00000000 | 1.24602000  | -1.01823000 | C | 0.00000000 | 0.00000000  | -1.65868000 | C | 0.00000000 | -1.24602000 | -1.01823000 | C | 0.00000000 | -1.44533000 | 0.36688000  | H | 0.00000000  | 0.00000000  | 2.85562000  | H | 0.00000000  | 2.45641000 | 0.73413000 | H | 0.00000000 | 2.11588000 | -1.65512000 | H | 0.00000000 | 0.00000000  | -2.73452000 | H | 0.00000000 | -2.11588000 | -1.65512000 | H | 0.00000000 | -2.45641000 | 0.73413000  |                                                                                                                                                                                                                                                                                                                                                                                                                                                                                                                                                                                                                                                                                                                                                                                                                                                                                                                                                                                                                                                                                              |    |             |             |             |   |             |             |            |   |            |            |            |   |            |             |            |   |            |             |            |   |            |             |             |   |             |             |             |   |             |             |            |   |            |            |            |   |            |             |            |   |            |            |            |   |            |             |             |
| Si                                                                                                                                                                                                                                                                                                                                                                                                                                                                                                                                                                                                                                                                                                                                                                                                                                                                                                                                                                                                                                                                                                                                              | 0.00000000  | 0.00000000  | 1.39208000  |            |   |             |             |            |   |            |             |             |   |            |             |             |   |            |             |             |   |            |             |             |   |             |             |             |   |             |            |            |   |            |            |             |   |            |             |             |   |            |             |             |   |            |             |             |                                                                                                                                                                                                                                                                                                                                                                                                                                                                                                                                                                                                                                                                                                                                                                                                                                                                                                                                                                                                                                                                                              |    |             |             |             |   |             |             |            |   |            |            |            |   |            |             |            |   |            |             |            |   |            |             |             |   |             |             |             |   |             |             |            |   |            |            |            |   |            |             |            |   |            |            |            |   |            |             |             |
| C                                                                                                                                                                                                                                                                                                                                                                                                                                                                                                                                                                                                                                                                                                                                                                                                                                                                                                                                                                                                                                                                                                                                               | 0.00000000  | 1.44533000  | 0.36688000  |            |   |             |             |            |   |            |             |             |   |            |             |             |   |            |             |             |   |            |             |             |   |             |             |             |   |             |            |            |   |            |            |             |   |            |             |             |   |            |             |             |   |            |             |             |                                                                                                                                                                                                                                                                                                                                                                                                                                                                                                                                                                                                                                                                                                                                                                                                                                                                                                                                                                                                                                                                                              |    |             |             |             |   |             |             |            |   |            |            |            |   |            |             |            |   |            |             |            |   |            |             |             |   |             |             |             |   |             |             |            |   |            |            |            |   |            |             |            |   |            |            |            |   |            |             |             |
| C                                                                                                                                                                                                                                                                                                                                                                                                                                                                                                                                                                                                                                                                                                                                                                                                                                                                                                                                                                                                                                                                                                                                               | 0.00000000  | 1.24602000  | -1.01823000 |            |   |             |             |            |   |            |             |             |   |            |             |             |   |            |             |             |   |            |             |             |   |             |             |             |   |             |            |            |   |            |            |             |   |            |             |             |   |            |             |             |   |            |             |             |                                                                                                                                                                                                                                                                                                                                                                                                                                                                                                                                                                                                                                                                                                                                                                                                                                                                                                                                                                                                                                                                                              |    |             |             |             |   |             |             |            |   |            |            |            |   |            |             |            |   |            |             |            |   |            |             |             |   |             |             |             |   |             |             |            |   |            |            |            |   |            |             |            |   |            |            |            |   |            |             |             |
| C                                                                                                                                                                                                                                                                                                                                                                                                                                                                                                                                                                                                                                                                                                                                                                                                                                                                                                                                                                                                                                                                                                                                               | 0.00000000  | 0.00000000  | -1.65868000 |            |   |             |             |            |   |            |             |             |   |            |             |             |   |            |             |             |   |            |             |             |   |             |             |             |   |             |            |            |   |            |            |             |   |            |             |             |   |            |             |             |   |            |             |             |                                                                                                                                                                                                                                                                                                                                                                                                                                                                                                                                                                                                                                                                                                                                                                                                                                                                                                                                                                                                                                                                                              |    |             |             |             |   |             |             |            |   |            |            |            |   |            |             |            |   |            |             |            |   |            |             |             |   |             |             |             |   |             |             |            |   |            |            |            |   |            |             |            |   |            |            |            |   |            |             |             |
| C                                                                                                                                                                                                                                                                                                                                                                                                                                                                                                                                                                                                                                                                                                                                                                                                                                                                                                                                                                                                                                                                                                                                               | 0.00000000  | -1.24602000 | -1.01823000 |            |   |             |             |            |   |            |             |             |   |            |             |             |   |            |             |             |   |            |             |             |   |             |             |             |   |             |            |            |   |            |            |             |   |            |             |             |   |            |             |             |   |            |             |             |                                                                                                                                                                                                                                                                                                                                                                                                                                                                                                                                                                                                                                                                                                                                                                                                                                                                                                                                                                                                                                                                                              |    |             |             |             |   |             |             |            |   |            |            |            |   |            |             |            |   |            |             |            |   |            |             |             |   |             |             |             |   |             |             |            |   |            |            |            |   |            |             |            |   |            |            |            |   |            |             |             |
| C                                                                                                                                                                                                                                                                                                                                                                                                                                                                                                                                                                                                                                                                                                                                                                                                                                                                                                                                                                                                                                                                                                                                               | 0.00000000  | -1.44533000 | 0.36688000  |            |   |             |             |            |   |            |             |             |   |            |             |             |   |            |             |             |   |            |             |             |   |             |             |             |   |             |            |            |   |            |            |             |   |            |             |             |   |            |             |             |   |            |             |             |                                                                                                                                                                                                                                                                                                                                                                                                                                                                                                                                                                                                                                                                                                                                                                                                                                                                                                                                                                                                                                                                                              |    |             |             |             |   |             |             |            |   |            |            |            |   |            |             |            |   |            |             |            |   |            |             |             |   |             |             |             |   |             |             |            |   |            |            |            |   |            |             |            |   |            |            |            |   |            |             |             |
| H                                                                                                                                                                                                                                                                                                                                                                                                                                                                                                                                                                                                                                                                                                                                                                                                                                                                                                                                                                                                                                                                                                                                               | 0.00000000  | 0.00000000  | 2.85562000  |            |   |             |             |            |   |            |             |             |   |            |             |             |   |            |             |             |   |            |             |             |   |             |             |             |   |             |            |            |   |            |            |             |   |            |             |             |   |            |             |             |   |            |             |             |                                                                                                                                                                                                                                                                                                                                                                                                                                                                                                                                                                                                                                                                                                                                                                                                                                                                                                                                                                                                                                                                                              |    |             |             |             |   |             |             |            |   |            |            |            |   |            |             |            |   |            |             |            |   |            |             |             |   |             |             |             |   |             |             |            |   |            |            |            |   |            |             |            |   |            |            |            |   |            |             |             |
| H                                                                                                                                                                                                                                                                                                                                                                                                                                                                                                                                                                                                                                                                                                                                                                                                                                                                                                                                                                                                                                                                                                                                               | 0.00000000  | 2.45641000  | 0.73413000  |            |   |             |             |            |   |            |             |             |   |            |             |             |   |            |             |             |   |            |             |             |   |             |             |             |   |             |            |            |   |            |            |             |   |            |             |             |   |            |             |             |   |            |             |             |                                                                                                                                                                                                                                                                                                                                                                                                                                                                                                                                                                                                                                                                                                                                                                                                                                                                                                                                                                                                                                                                                              |    |             |             |             |   |             |             |            |   |            |            |            |   |            |             |            |   |            |             |            |   |            |             |             |   |             |             |             |   |             |             |            |   |            |            |            |   |            |             |            |   |            |            |            |   |            |             |             |
| H                                                                                                                                                                                                                                                                                                                                                                                                                                                                                                                                                                                                                                                                                                                                                                                                                                                                                                                                                                                                                                                                                                                                               | 0.00000000  | 2.11588000  | -1.65512000 |            |   |             |             |            |   |            |             |             |   |            |             |             |   |            |             |             |   |            |             |             |   |             |             |             |   |             |            |            |   |            |            |             |   |            |             |             |   |            |             |             |   |            |             |             |                                                                                                                                                                                                                                                                                                                                                                                                                                                                                                                                                                                                                                                                                                                                                                                                                                                                                                                                                                                                                                                                                              |    |             |             |             |   |             |             |            |   |            |            |            |   |            |             |            |   |            |             |            |   |            |             |             |   |             |             |             |   |             |             |            |   |            |            |            |   |            |             |            |   |            |            |            |   |            |             |             |
| H                                                                                                                                                                                                                                                                                                                                                                                                                                                                                                                                                                                                                                                                                                                                                                                                                                                                                                                                                                                                                                                                                                                                               | 0.00000000  | 0.00000000  | -2.73452000 |            |   |             |             |            |   |            |             |             |   |            |             |             |   |            |             |             |   |            |             |             |   |             |             |             |   |             |            |            |   |            |            |             |   |            |             |             |   |            |             |             |   |            |             |             |                                                                                                                                                                                                                                                                                                                                                                                                                                                                                                                                                                                                                                                                                                                                                                                                                                                                                                                                                                                                                                                                                              |    |             |             |             |   |             |             |            |   |            |            |            |   |            |             |            |   |            |             |            |   |            |             |             |   |             |             |             |   |             |             |            |   |            |            |            |   |            |             |            |   |            |            |            |   |            |             |             |
| H                                                                                                                                                                                                                                                                                                                                                                                                                                                                                                                                                                                                                                                                                                                                                                                                                                                                                                                                                                                                                                                                                                                                               | 0.00000000  | -2.11588000 | -1.65512000 |            |   |             |             |            |   |            |             |             |   |            |             |             |   |            |             |             |   |            |             |             |   |             |             |             |   |             |            |            |   |            |            |             |   |            |             |             |   |            |             |             |   |            |             |             |                                                                                                                                                                                                                                                                                                                                                                                                                                                                                                                                                                                                                                                                                                                                                                                                                                                                                                                                                                                                                                                                                              |    |             |             |             |   |             |             |            |   |            |            |            |   |            |             |            |   |            |             |            |   |            |             |             |   |             |             |             |   |             |             |            |   |            |            |            |   |            |             |            |   |            |            |            |   |            |             |             |
| H                                                                                                                                                                                                                                                                                                                                                                                                                                                                                                                                                                                                                                                                                                                                                                                                                                                                                                                                                                                                                                                                                                                                               | 0.00000000  | -2.45641000 | 0.73413000  |            |   |             |             |            |   |            |             |             |   |            |             |             |   |            |             |             |   |            |             |             |   |             |             |             |   |             |            |            |   |            |            |             |   |            |             |             |   |            |             |             |   |            |             |             |                                                                                                                                                                                                                                                                                                                                                                                                                                                                                                                                                                                                                                                                                                                                                                                                                                                                                                                                                                                                                                                                                              |    |             |             |             |   |             |             |            |   |            |            |            |   |            |             |            |   |            |             |            |   |            |             |             |   |             |             |             |   |             |             |            |   |            |            |            |   |            |             |            |   |            |            |            |   |            |             |             |

**Table S23.** Cartesian coordinates of **pyridinium ion** in the  $S_0$  state and along of the puckering coordinate in the  $S_1$  state ( $S_1$  minimum and  $S_1/S_0$  conical intersection) at SA3-CASSCF(6,6)/ANO-RCC-VTZP level. Absolute energies at MS3-CASPT2(6,6)/ANO-RCC-VTZP level.

| Pyridinium ion in the $S_0$ state                    |             |             |             | Pyridinium ion in the $S_1$ state |             |             |             |
|------------------------------------------------------|-------------|-------------|-------------|-----------------------------------|-------------|-------------|-------------|
| E : -248.244749 a.u.                                 |             |             |             | E : -248.062765 a.u.              |             |             |             |
| C                                                    | 1.37611153  | -0.00000099 | 0.00000001  | C                                 | 1.45036753  | 0.00000296  | -0.00000008 |
| C                                                    | 0.67900930  | -1.20496279 | -0.00000001 | C                                 | 0.69956644  | -1.22011441 | 0.00000003  |
| C                                                    | -0.69911538 | -1.17814263 | 0.00000001  | C                                 | -0.71748448 | -1.19097839 | -0.00000000 |
| N                                                    | -1.33256409 | 0.00000065  | -0.00000002 | N                                 | -1.38553153 | -0.00000238 | 0.00000001  |
| C                                                    | -0.69911464 | 1.17814382  | 0.00000002  | C                                 | -0.71748231 | 1.19097211  | -0.00000004 |
| C                                                    | 0.67900984  | 1.20496233  | -0.00000001 | C                                 | 0.69956712  | 1.22012132  | 0.00000009  |
| H                                                    | 2.44736419  | -0.00000018 | 0.00000003  | H                                 | 2.51670444  | 0.00000031  | -0.00000026 |
| H                                                    | 1.18689626  | -2.14643290 | -0.00000003 | H                                 | 1.17599244  | -2.17690049 | 0.00000015  |
| H                                                    | -1.31269980 | -2.05417369 | 0.00000005  | H                                 | -1.32278721 | -2.07197491 | -0.00000005 |
| H                                                    | -1.31270172 | 2.05417288  | 0.00000007  | H                                 | -1.32278342 | 2.07197008  | -0.00000021 |
| H                                                    | 1.18689565  | 2.14643301  | -0.00000004 | H                                 | 1.17600068  | 2.17690414  | 0.00000030  |
| H                                                    | -2.33150614 | 0.00000048  | -0.00000008 | H                                 | -2.38454467 | -0.00000034 | 0.00000007  |
| Pyridinium ion in the $S_1/S_0$ conical intersection |             |             |             |                                   |             |             |             |
| E : -248.067935 a.u.                                 |             |             |             |                                   |             |             |             |
| C                                                    | 1.48749814  | 0.02316709  | 0.14479044  |                                   |             |             |             |
| C                                                    | 0.74222781  | -1.15579705 | 0.00945472  |                                   |             |             |             |
| C                                                    | -0.68932500 | -0.97871246 | -0.07313844 |                                   |             |             |             |
| N                                                    | -1.31715011 | -0.02051358 | 0.69971867  |                                   |             |             |             |
| C                                                    | -0.71946820 | 0.95677043  | -0.07313845 |                                   |             |             |             |
| C                                                    | 0.70587308  | 1.17834959  | 0.00945494  |                                   |             |             |             |
| H                                                    | 2.54932448  | 0.03970564  | 0.25950056  |                                   |             |             |             |
| H                                                    | 1.15545589  | -2.13334780 | -0.12364239 |                                   |             |             |             |
| H                                                    | -1.31620754 | -1.65223215 | -0.62661628 |                                   |             |             |             |
| H                                                    | -1.36701942 | 1.61044147  | -0.62661664 |                                   |             |             |             |
| H                                                    | 1.08845754  | 2.16829438  | -0.12364199 |                                   |             |             |             |
| H                                                    | -2.31741661 | -0.03609153 | 0.67145756  |                                   |             |             |             |

**Table S24.** Electronic configurations and configuration weights for the  $S_1$  vertical and  $S_1$  minimum and activation barriers (in kcal/mol) from the  $S_1$  state minimum at CASSCF and CASPT2/CASSCF levels.

| Molecule             | State       | Conf   | weight | Conf   | weight | $\Delta E$<br>CASSCF | $\Delta E$<br>CASPT2 |
|----------------------|-------------|--------|--------|--------|--------|----------------------|----------------------|
| Benzene              | $S_{1vert}$ | 2u2d00 | 0.40   | u2200d | 0.40   | 20.0                 | 9.4                  |
|                      | $S_{1min}$  | 2u200d | 0.38   | u22d00 | 0.38   |                      |                      |
| Silabenzene          | $S_{1vert}$ | u220d0 | 0.40   | 2u2d00 | 0.34   | 6.6                  | -3.5                 |
|                      | $S_{1min}$  | 2u2d00 | 0.46   | u220d0 | 0.20   |                      |                      |
| Pyridinium ion       | $S_{1vert}$ | 2u200d | 0.59   | 22ud00 | 0.20   | 8.8                  | -3.2                 |
|                      | $S_{1min}$  | 2u200d | 0.59   | 22ud00 | 0.18   |                      |                      |
| TMS-benzene          | $S_{1vert}$ | 2u2d00 | 0.43   | 22u0d0 | 0.35   | 16.4–18.5            | 7.6–9.7              |
|                      | $S_{1min}$  | 2u2d00 | 0.42   | 22u0d0 | 0.34   |                      |                      |
| <i>t</i> -Bu-benzene | $S_{1vert}$ | 22ud00 | 0.41   | 2u20d0 | 0.37   | 15.0–18.5            | 7.9–10.0             |
|                      | $S_{1min}$  | 2u2d00 | 0.40   | 22u0d0 | 0.36   |                      |                      |

**Table S25.** Vertical and adiabatic (min-min) excitation energies (in kcal/mol) in the gas phase calculated for **benzene**, **TMS-benzene** and ***t*-Bu-benzene** at B3LYP/6-311+G(d,p) and MS-CASPT2(6,6)/ANO-RCC-VDZP//SA-CASSCF(6,6)/ANO-RCC-VDZP levels. For benzene, the results calculated with ANO-RCC-VTZP basis set are also shown (in italics).

| Molecule             | TD-DFT                                       | TD-DFT                                       | MS-CASPT2                                    | MS-CASPT2                                    |
|----------------------|----------------------------------------------|----------------------------------------------|----------------------------------------------|----------------------------------------------|
|                      | $\Delta E$ (S <sub>1</sub> -S <sub>0</sub> ) |
|                      | vertical                                     | min-min                                      | vertical                                     | min-min                                      |
| Benzene              | 124.2                                        | 121.3                                        | 118.4                                        | 113.4                                        |
|                      |                                              |                                              | <i>117.3</i>                                 | <i>113.0</i>                                 |
| <i>t</i> -Bu-benzene | 122.1                                        | 119.1                                        | 117.6                                        | 112.7                                        |
| TMS-benzene          | 121.0                                        | 118.0                                        | 116.1                                        | 111.4                                        |

**Table S26.** Activation barriers,  $\Delta E$  (without ZPE corrections) and  $\Delta G$ , in kcal/mol, in the S<sub>1</sub> states of **benzene**, **TMS-benzene** and ***t*-Bu-benzene** in the gas phase. For substituted benzene, the four possible TS structures were considered as shown in Figure S43 and Figure S44. The calculations were performed at MS-CASPT2(6,6)/ANO-RCC-VDZP//SA-CASSCF(6,6)/ANO-RCC-VDZP level using, respectively, four and three states in the state-average for benzene and substituted benzene. For benzene, the results obtained with the ANO-RCC-VTZP basis set are also shown (italics).

| Molecule             | Prefulvene 1 |             | Prefulvene 2 |            | Prefulvene 3 |            | Prefulvene 4 |            |
|----------------------|--------------|-------------|--------------|------------|--------------|------------|--------------|------------|
|                      | $\Delta E$   | $\Delta G$  | $\Delta E$   | $\Delta G$ | $\Delta E$   | $\Delta G$ | $\Delta E$   | $\Delta G$ |
| Benzene              | 9.9          | 19.9        |              |            |              |            |              |            |
|                      | <i>9.4</i>   | <i>20.7</i> |              |            |              |            |              |            |
| <i>t</i> -Bu-benzene | 7.9          | 15.0        | 8.9          | 18.8       | 8.5          | 17.8       | 10.0         | 18.8       |
| TMS-benzene          | 8.1          | 13.4        | 7.6          | 17.0       | 9.7          | 16.2       | 9.6          | 17.5       |

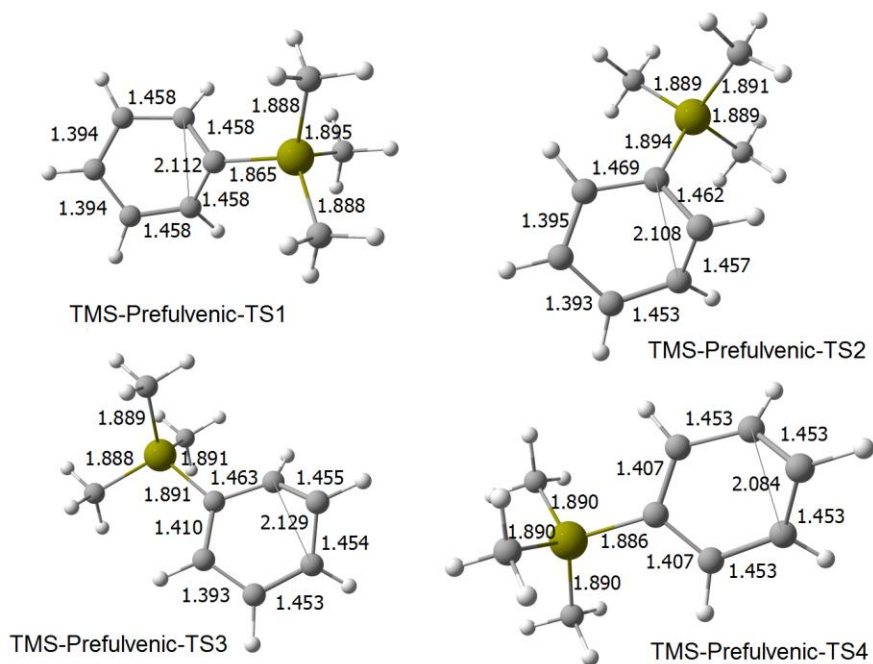

**Figure S43.** Optimized transition state structures, C – C, and C – Si bond lengths for the  $S_1$  state of **TMS-benzene** showing the TMS group at different positions. Calculations at SA3-CASSCF(6,6)/ANO-RCC-VDZP level.

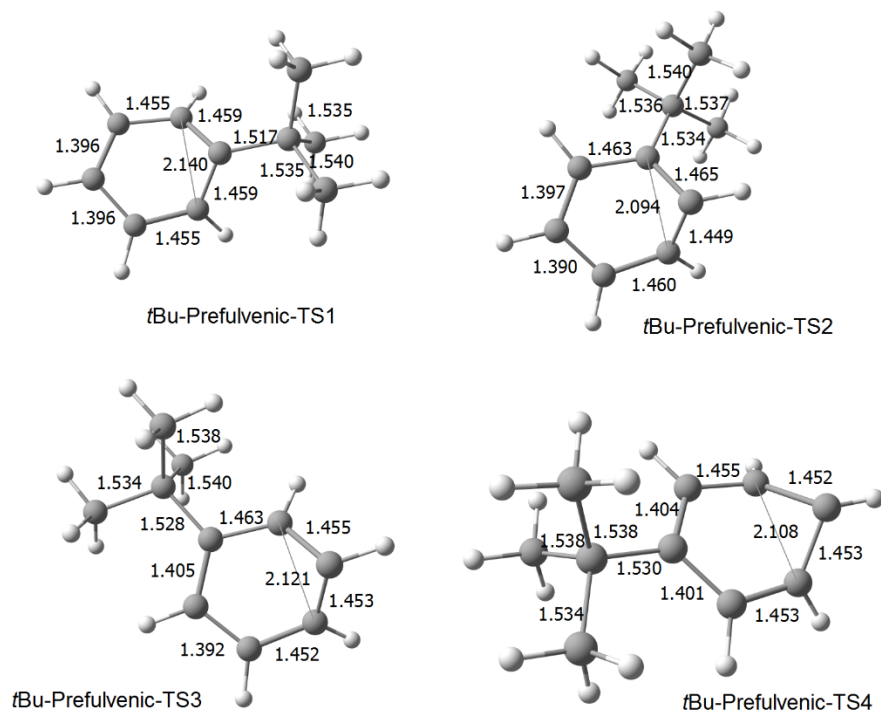

**Figure S44.** Optimized transition state structures and C – C bond lengths for the  $S_1$  state of ***t*Bu-benzene** showing the *t*-Bu group at different positions. Calculations at the SA3-CASSCF(6,6)/ANO-RCC-VDZP level.

**Table S27.** Cartesian coordinates for **TMS-benzene** in the  $S_0$  and  $S_1$  states and the prefulvenic transition state in  $S_1$  calculated with SA3-CASSCF(6,6)/ANO-RCC-VDZP. Absolute energies at MS3-CASPT2(6,6)/ANO-RCC-VDZP level.

|                                                          |             |             |             |                                                          |             |             |             |
|----------------------------------------------------------|-------------|-------------|-------------|----------------------------------------------------------|-------------|-------------|-------------|
| <b>TMS-benzene in the <math>S_0</math> state</b>         |             |             |             | <b>TMS-benzene minimum in the <math>S_1</math> state</b> |             |             |             |
| E : -640.16262487 a.u.                                   |             |             |             | E : -639.98512393 a.u.                                   |             |             |             |
| C                                                        | 0.41542099  | 0.21256595  | 0.00340498  | C                                                        | 0.40262916  | 0.26627669  | -0.01831646 |
| C                                                        | 1.12402769  | 0.02125047  | 1.20087832  | C                                                        | 1.12157365  | 0.05681491  | 1.21844620  |
| C                                                        | 2.47689288  | -0.31890998 | 1.20157254  | C                                                        | 2.50150891  | -0.32971611 | 1.23494863  |
| C                                                        | 3.15781862  | -0.47688987 | -0.00300889 | C                                                        | 3.21172745  | -0.52134551 | 0.01208981  |
| C                                                        | 2.47654205  | -0.29236096 | -1.20837466 | C                                                        | 2.53013788  | -0.32268423 | -1.22586074 |
| C                                                        | 1.12730186  | 0.04677873  | -1.19910295 | C                                                        | 1.15012807  | 0.06382187  | -1.23917604 |
| H                                                        | 0.62288375  | 0.13688526  | 2.14520221  | H                                                        | 0.62015323  | 0.19541361  | 2.15769571  |
| H                                                        | 2.99275992  | -0.45885988 | 2.13480310  | H                                                        | 2.99966333  | -0.47370282 | 2.17511397  |
| H                                                        | 4.20047308  | -0.73901450 | -0.00589227 | H                                                        | 4.24489849  | -0.81061827 | 0.02327743  |
| H                                                        | 2.99344371  | -0.41250645 | -2.14378289 | H                                                        | 3.05001552  | 0.06300978  | -2.15500335 |
| H                                                        | 0.62572180  | 0.18324568  | -2.14222663 | H                                                        | 0.67064686  | 0.20770572  | -2.18905649 |
| Si                                                       | -1.42509044 | 0.67567783  | -0.02907538 | Si                                                       | -1.43436081 | 0.68632999  | -0.03938126 |
| C                                                        | -2.09258586 | 0.82418151  | 1.73219532  | C                                                        | -1.88312790 | 1.68013171  | 1.50507474  |
| H                                                        | -3.14770796 | 1.08972487  | 1.70852224  | H                                                        | -2.93216658 | 1.96846135  | 1.47449957  |
| H                                                        | -2.00297142 | -0.11138861 | 2.27935391  | H                                                        | -1.73131981 | 1.10820039  | 2.41730636  |
| H                                                        | -1.57403528 | 1.59463257  | 2.29807124  | H                                                        | -1.29137642 | 2.58963136  | 1.57972328  |
| C                                                        | -1.63863347 | 2.32956162  | -0.91890015 | C                                                        | -1.84059717 | 1.71032098  | -1.57590890 |
| H                                                        | -1.26769643 | 2.28547654  | -1.94039017 | H                                                        | -1.66258846 | 1.15660593  | -2.49462296 |
| H                                                        | -2.68784106 | 2.61537632  | -0.96157123 | H                                                        | -2.89033563 | 1.99765297  | -1.56927966 |
| H                                                        | -1.09778614 | 3.12220613  | -0.40668521 | H                                                        | -1.24769650 | 2.62125233  | -1.61591461 |
| C                                                        | -2.39074641 | -0.66184401 | -0.95171303 | C                                                        | -2.46343881 | -0.90082185 | -0.06943270 |
| H                                                        | -2.29171124 | -1.62639705 | -0.45876830 | H                                                        | -2.26393600 | -1.51555291 | 0.80571591  |
| H                                                        | -3.45014217 | -0.41655345 | -0.99483446 | H                                                        | -3.52891566 | -0.67849472 | -0.08333754 |
| H                                                        | -2.03776318 | -0.77735709 | -1.97398452 | H                                                        | -2.23771458 | -1.49930918 | -0.94946283 |
| <b>TMS-Prefulvenic-TS1 in the <math>S_1</math> state</b> |             |             |             | <b>TMS-Prefulvenic-TS2 in the <math>S_1</math> state</b> |             |             |             |
| E : -639.97220041 a.u.                                   |             |             |             | E : -639.97299881 a.u.                                   |             |             |             |
| C                                                        | -0.29396273 | 0.09561514  | 0.00000110  | C                                                        | 0.43252725  | 1.22352711  | 0.85266300  |
| C                                                        | -1.16986137 | -0.39886650 | -1.05612854 | C                                                        | 1.64349684  | 1.27998908  | 0.03546568  |
| C                                                        | -2.55153792 | 0.05141188  | -1.17091596 | C                                                        | 2.41216301  | 2.53124941  | 0.07729451  |
| C                                                        | -3.23138689 | 0.38508492  | -0.00001991 | C                                                        | 1.71914518  | 3.73781412  | 0.17954364  |
| C                                                        | -2.55154688 | 0.05149288  | 1.17090444  | C                                                        | 0.33615294  | 3.61734048  | 0.06309515  |
| C                                                        | -1.16986865 | -0.39879176 | 1.05615908  | C                                                        | -0.21569092 | 2.27345341  | 0.07729739  |
| H                                                        | -0.82279975 | -1.15431369 | -1.74379520 | H                                                        | -0.08036557 | 0.28534324  | 0.98232126  |
| H                                                        | -3.02357057 | 0.06762804  | -2.13645724 | H                                                        | 3.48212537  | 2.50266600  | -0.01749975 |
| H                                                        | -4.22670476 | 0.78637251  | -0.00003748 | H                                                        | 2.21666048  | 4.68607126  | 0.25607258  |
| H                                                        | -3.02358771 | 0.06777288  | 2.13644064  | H                                                        | -0.31143998 | 4.46296407  | -0.07913222 |
| H                                                        | -0.82281193 | -1.15419023 | 1.74388176  | H                                                        | -1.07356530 | 2.04641211  | -0.53330518 |
| Si                                                       | 1.57149631  | 0.08485547  | 0.00000027  | Si                                                       | 2.13263829  | -0.18480564 | -1.06114231 |
| C                                                        | 2.17211809  | 0.97927803  | -1.55093027 | C                                                        | 2.50046813  | -1.67244635 | 0.04714882  |
| H                                                        | 3.25932572  | 1.00270055  | -1.59175228 | H                                                        | 1.63679693  | -1.94529757 | 0.64931079  |
| H                                                        | 1.82022578  | 0.48583859  | -2.45450564 | H                                                        | 2.77466786  | -2.54155524 | -0.54797385 |
| H                                                        | 1.81488166  | 2.00617126  | -1.57531656 | H                                                        | 3.32286781  | -1.46303127 | 0.72766350  |
| C                                                        | 2.17212638  | 0.97923349  | 1.55095343  | C                                                        | 3.67612612  | 0.24456002  | -2.06232125 |
| H                                                        | 1.82025740  | 0.48575702  | 2.45451760  | H                                                        | 4.52689823  | 0.46129243  | -1.42020834 |
| H                                                        | 3.25933433  | 1.00267187  | 1.59175810  | H                                                        | 3.95493429  | -0.59076263 | -2.70178997 |
| H                                                        | 1.81487455  | 2.00612039  | 1.57538116  | H                                                        | 3.51103463  | 1.10932126  | -2.70066719 |
| C                                                        | 2.26720837  | -1.67810963 | -0.00002970 | C                                                        | 0.72104112  | -0.62907207 | -2.23572628 |
| H                                                        | 1.94419204  | -2.23378784 | -0.87807125 | H                                                        | 0.98033033  | -1.49975512 | -2.83536390 |
| H                                                        | 3.35581411  | -1.66783386 | -0.00004152 | H                                                        | -0.19091075 | -0.86460987 | -1.69195097 |
| H                                                        | 1.94421045  | -2.23381113 | 0.87800393  | H                                                        | 0.50065938  | 0.19096812  | -2.91473489 |
| Imaginary frequency : 356i $\text{cm}^{-1}$              |             |             |             | Imaginary frequency : 255i $\text{cm}^{-1}$              |             |             |             |
| <b>TMS-Prefulvenic-TS3 in the <math>S_1</math> state</b> |             |             |             | <b>TMS-Prefulvenic-TS4 in the <math>S_1</math> state</b> |             |             |             |
| E : -639.9696909 a.u.                                    |             |             |             | E : -639.96984094 a.u.                                   |             |             |             |
| C                                                        | 0.33466349  | 1.04045856  | -0.17358021 | C                                                        | 0.75587414  | 0.98038199  | 0.59324325  |
| C                                                        | 1.62921239  | 1.46792858  | -0.68125265 | C                                                        | 1.39402609  | 1.39989185  | -0.64230489 |
| C                                                        | 2.48153093  | 2.38882600  | 0.07180734  | C                                                        | 2.17296942  | 2.62570269  | -0.69488724 |



|    |             |             |             |    |             |            |             |
|----|-------------|-------------|-------------|----|-------------|------------|-------------|
| C  | 1.79234501  | 3.33538572  | 0.85795441  | C  | 1.79677931  | 3.71220150 | 0.11565756  |
| C  | 0.41622736  | 3.41168503  | 0.65868724  | C  | 0.54473188  | 3.49319036 | 0.71848335  |
| C  | -0.21732654 | 2.38529040  | -0.15221640 | C  | -0.06586391 | 2.17768619 | 0.62493030  |
| H  | -0.19805397 | 0.27454073  | -0.71068336 | H  | 0.26882395  | 0.02091773 | 0.62103763  |
| H  | 1.94660976  | 1.13913127  | -1.65735537 | H  | 1.27078415  | 0.81893053 | -1.54144576 |
| H  | 2.30152514  | 4.02068374  | 1.50876522  | H  | 2.98495451  | 2.68772762 | -1.39705764 |
| H  | -0.17516537 | 4.21743591  | 1.05498676  | H  | -0.00628253 | 4.28138549 | 1.19946217  |
| H  | -1.04854187 | 2.64790021  | -0.78504865 | H  | -1.13815628 | 2.10236740 | 0.54959689  |
| Si | 4.36575709  | 2.26949109  | -0.04294245 | Si | 2.79552858  | 5.30274246 | 0.29040277  |
| C  | 4.93605706  | 0.60155483  | 0.63628699  | C  | 3.98745671  | 5.16603428 | 1.75061865  |
| H  | 4.65414028  | 0.48546273  | 1.68032936  | H  | 3.44988882  | 4.99396710 | 2.68062029  |
| H  | 4.49305224  | -0.22305664 | 0.08232756  | H  | 4.68049133  | 4.33855088 | 1.61473496  |
| H  | 6.01781660  | 0.50227098  | 0.56966597  | H  | 4.57373128  | 6.07549600 | 1.86826865  |
| C  | 5.15382889  | 3.66428174  | 0.95603728  | C  | 3.78734936  | 5.60440847 | -1.29042212 |
| H  | 4.89303020  | 3.60150832  | 2.00989091  | H  | 4.34506527  | 6.53593307 | -1.21561088 |
| H  | 6.23834320  | 3.61056694  | 0.88356359  | H  | 4.50717423  | 4.81014761 | -1.47455087 |
| H  | 4.84728087  | 4.64213247  | 0.59231335  | H  | 3.13876050  | 5.67525057 | -2.16067313 |
| C  | 4.88860288  | 2.41501459  | -1.85406788 | C  | 1.62368313  | 6.75690377 | 0.58355505  |
| H  | 5.97162029  | 2.35698528  | -1.94518157 | H  | 0.90882369  | 6.86296436 | -0.22931126 |
| H  | 4.46756222  | 1.61725507  | -2.46149799 | H  | 1.06278927  | 6.64477466 | 1.50860912  |
| H  | 4.56921726  | 3.36229058  | -2.28248410 | H  | 2.18451910  | 7.68676736 | 0.65560417  |

Imaginary frequency : 337i cm<sup>-1</sup>

Imaginary frequency : 356i cm<sup>-1</sup>

**Table S28.** Cartesian coordinates for *t*Bu-benzene in the S<sub>0</sub> and S<sub>1</sub> states, and the prefulvenic transition state structure in S<sub>1</sub> calculated with SA3-CASSCF(6,6)/ANO-RCC-VDZP. Absolute energies at MS3-CASPT2(6,6)/ANO-RCC-VDZP level.

|                                                              |             |             |             |                                                              |             |             |             |
|--------------------------------------------------------------|-------------|-------------|-------------|--------------------------------------------------------------|-------------|-------------|-------------|
| <b><i>t</i>Bu-benzene in the S<sub>0</sub> state</b>         |             |             |             | <b><i>t</i>Bu-benzene minimum in the S<sub>1</sub> state</b> |             |             |             |
| E : -388.51489601 a.u.                                       |             |             |             | E : -388.33534965 a.u.                                       |             |             |             |
| C                                                            | -2.42468118 | 1.36079246  | -0.01549959 | C                                                            | -2.44845897 | 1.33985733  | -0.02155610 |
| C                                                            | -1.02021456 | 1.35033833  | 0.03743874  | C                                                            | -1.00969446 | 1.33129494  | 0.03722510  |
| C                                                            | -0.37419536 | 2.58645995  | 0.09768955  | C                                                            | -0.34202847 | 2.61004967  | 0.10484692  |
| C                                                            | -1.09428667 | 3.78738301  | 0.10537091  | C                                                            | -1.08483195 | 3.83980389  | 0.11363079  |
| C                                                            | -2.48242904 | 3.77497439  | 0.05273005  | C                                                            | -2.51074259 | 3.82411336  | 0.05501108  |
| C                                                            | -3.14705728 | 2.55232887  | -0.00808180 | C                                                            | -3.19488840 | 2.57065170  | -0.01294244 |
| H                                                            | -2.96748103 | 0.43541676  | -0.06296514 | H                                                            | -2.99017547 | 0.41588760  | -0.07306784 |
| H                                                            | 0.69557355  | 2.64115834  | 0.13960157  | H                                                            | 0.72600475  | 2.66341587  | 0.14973783  |
| H                                                            | -0.56349527 | 4.72136607  | 0.15257972  | H                                                            | -0.55784901 | 4.77373282  | 0.16457258  |
| H                                                            | -3.03621442 | 4.69645881  | 0.05847063  | H                                                            | -3.06411800 | 4.74391201  | 0.06150949  |
| H                                                            | -4.22122094 | 2.52317397  | -0.04938700 | H                                                            | -4.26693223 | 2.54153234  | -0.05766881 |
| C                                                            | -0.26539559 | 0.00951707  | 0.02587714  | C                                                            | -0.25820163 | -0.00460450 | 0.02567302  |
| C                                                            | -0.58741964 | -0.75272411 | -1.27095782 | C                                                            | -0.58347335 | -0.77319142 | -1.27068003 |
| H                                                            | -0.05528459 | -1.70012776 | -1.29635526 | H                                                            | -0.05144833 | -1.72015774 | -1.29485771 |
| H                                                            | -1.64653459 | -0.96818023 | -1.36266428 | H                                                            | -1.64202519 | -0.99009504 | -1.35921639 |
| H                                                            | -0.29035935 | -0.17704948 | -2.14310524 | H                                                            | -0.28876530 | -0.20055539 | -2.14462623 |
| C                                                            | -0.69498662 | -0.83615053 | 1.23701423  | C                                                            | -0.68453219 | -0.85197645 | 1.24105953  |
| H                                                            | -0.16039314 | -1.78242431 | 1.24745982  | H                                                            | -0.15996092 | -1.80342164 | 1.24406763  |
| H                                                            | -0.47975409 | -0.31841036 | 2.16754897  | H                                                            | -0.45468887 | -0.33938475 | 2.17002622  |
| H                                                            | -1.75636415 | -1.05902826 | 1.22093056  | H                                                            | -1.74769417 | -1.06417438 | 1.23516222  |
| C                                                            | 1.25563688  | 0.19677928  | 0.09784008  | C                                                            | 1.26583711  | 0.18242314  | 0.09299511  |
| H                                                            | 1.63514549  | 0.76115164  | -0.74844671 | H                                                            | 1.64194534  | 0.74575716  | -0.75474887 |
| H                                                            | 1.55866329  | 0.70401209  | 1.00875088  | H                                                            | 1.57094797  | 0.69085350  | 1.00176286  |
| H                                                            | 1.74245757  | -0.77384308 | 0.08722901  | H                                                            | 1.75362947  | -0.78703790 | 0.08242458  |
| <b><i>t</i>Bu-Prefulvenic-TS1 in the S<sub>1</sub> state</b> |             |             |             | <b><i>t</i>Bu-Prefulvenic-TS2 in the S<sub>1</sub> state</b> |             |             |             |
| E : -388.32279877 a.u.                                       |             |             |             | E : -388.32117491 a.u.                                       |             |             |             |
| C                                                            | 0.16146768  | 0.84778902  | 0.64897859  | C                                                            | 0.34094544  | 0.97433083  | 0.45047627  |
| C                                                            | 1.46452347  | 0.95575081  | 0.00165690  | C                                                            | 1.63582855  | 0.99517286  | -0.23426543 |
| C                                                            | 2.25250528  | 2.17125226  | 0.14223967  | C                                                            | 2.49771814  | 2.14744917  | 0.02845394  |
| C                                                            | 1.57375840  | 3.38217188  | 0.28900448  | C                                                            | 1.89948729  | 3.40039837  | 0.18615895  |
| C                                                            | 0.19594662  | 3.30808775  | 0.07755941  | C                                                            | 0.53632612  | 3.42596907  | -0.08588517 |

|                                                       |             |             |             |                                                       |             |             |             |
|-------------------------------------------------------|-------------|-------------|-------------|-------------------------------------------------------|-------------|-------------|-------------|
| C                                                     | -0.40759143 | 1.99062880  | -0.05722545 | C                                                     | -0.11951233 | 2.13667550  | -0.28219367 |
| H                                                     | 1.82386427  | 0.18105872  | -0.65551347 | H                                                     | -0.25697178 | 0.08164347  | 0.43055954  |
| H                                                     | 3.32418949  | 2.12015754  | 0.07624505  | H                                                     | 3.56431268  | 2.03519091  | 0.04959497  |
| H                                                     | 2.08226925  | 4.31180557  | 0.45995468  | H                                                     | 2.46348278  | 4.28125622  | 0.42721742  |
| H                                                     | -0.41289211 | 4.18596146  | -0.04128950 | H                                                     | -0.02760995 | 4.33673055  | -0.16892155 |
| H                                                     | -1.22218263 | 1.86487039  | -0.75132343 | H                                                     | -0.94992622 | 2.06371777  | -0.96486179 |
| C                                                     | -0.57173197 | -0.46857454 | 0.82496963  | C                                                     | 2.10477766  | -0.19857023 | -1.07530747 |
| C                                                     | -0.89907753 | -1.13718934 | -0.52305417 | C                                                     | 2.38992743  | -1.37929847 | -0.12875424 |
| H                                                     | -1.42306515 | -2.07614914 | -0.36267818 | H                                                     | 1.50135422  | -1.67096506 | 0.42211212  |
| H                                                     | -1.53533125 | -0.50853885 | -1.13884080 | H                                                     | 2.73386411  | -2.24519223 | -0.68906894 |
| H                                                     | 0.00009634  | -1.35717379 | -1.09077485 | H                                                     | 3.15894879  | -1.12308615 | 0.59488446  |
| C                                                     | 0.30580630  | -1.41643483 | 1.65444307  | C                                                     | 3.38269073  | 0.12157116  | -1.86423039 |
| H                                                     | 0.54980586  | -0.97592781 | 2.61683330  | H                                                     | 4.22928336  | 0.31144793  | -1.21275008 |
| H                                                     | -0.20930479 | -2.35634870 | 1.83450411  | H                                                     | 3.64650871  | -0.72190100 | -2.49581029 |
| H                                                     | 1.23884863  | -1.64276621 | 1.14704747  | H                                                     | 3.24781137  | 0.98856322  | -2.50399132 |
| C                                                     | -1.87933786 | -0.20849299 | 1.58593287  | C                                                     | 1.02235423  | -0.61160276 | -2.08601605 |
| H                                                     | -2.54161548 | 0.44725552  | 1.02859455  | H                                                     | 0.09151344  | -0.88150336 | -1.60042273 |
| H                                                     | -2.41002397 | -1.13982670 | 1.76534907  | H                                                     | 0.81567144  | 0.19464191  | -2.78319479 |
| H                                                     | -1.68226469 | 0.25779629  | 2.54692911  | H                                                     | 1.35576875  | -1.47411071 | -2.65697133 |
| Imaginary frequency : 337i cm <sup>-1</sup>           |             |             |             | Imaginary frequency : 270i cm <sup>-1</sup>           |             |             |             |
| <b>tBu-Prefulvenic-TS3 in the S<sub>1</sub> state</b> |             |             |             | <b>tBu-Prefulvenic-TS4 in the S<sub>1</sub> state</b> |             |             |             |
| E : -388.32175177 a.u.                                |             |             |             | E : -388.31944652 a.u.                                |             |             |             |
| C                                                     | 0.70197164  | 1.12092846  | 0.56609178  | C                                                     | 1.26144674  | 0.87049945  | 0.54295012  |
| C                                                     | 1.99725577  | 1.22212065  | -0.08822035 | C                                                     | 1.84306394  | 1.35189984  | -0.69706542 |
| C                                                     | 2.83134202  | 2.41495861  | 0.05451472  | C                                                     | 2.54320139  | 2.62678269  | -0.74129330 |
| C                                                     | 2.13178648  | 3.62519614  | 0.19570785  | C                                                     | 2.13245773  | 3.66364847  | 0.11209797  |
| C                                                     | 0.75938910  | 3.56047774  | -0.03046160 | C                                                     | 0.92751786  | 3.36705640  | 0.76343130  |
| C                                                     | 0.14426030  | 2.25163286  | -0.15595986 | C                                                     | 0.38550855  | 2.02265513  | 0.67048139  |
| H                                                     | 0.18248467  | 0.17887556  | 0.52514007  | H                                                     | 0.82028843  | -0.11136916 | 0.55494570  |
| H                                                     | 2.32872075  | 0.41828984  | -0.72212901 | H                                                     | 1.70809077  | 0.80080347  | -1.61310903 |
| H                                                     | 2.61929202  | 4.56080260  | 0.38078058  | H                                                     | 0.35683922  | 4.10755864  | 1.28935484  |
| H                                                     | 0.15847653  | 4.44459499  | -0.14321394 | H                                                     | -0.68427867 | 1.89629557  | 0.64234889  |
| H                                                     | -0.68724561 | 2.11844986  | -0.82792348 | C                                                     | 2.89280539  | 4.98701931  | 0.22423392  |
| C                                                     | 4.35099805  | 2.28857275  | -0.03620248 | C                                                     | 2.18149612  | 5.96678531  | 1.16587649  |
| C                                                     | 4.84611589  | 1.23318398  | 0.96763661  | H                                                     | 2.75402088  | 6.88653013  | 1.24194182  |
| H                                                     | 4.58238201  | 1.51002983  | 1.98446160  | H                                                     | 1.19172300  | 6.22762627  | 0.80300106  |
| H                                                     | 4.41701913  | 0.25654941  | 0.76906942  | H                                                     | 2.07957487  | 5.55895555  | 2.16704469  |
| H                                                     | 5.92743020  | 1.13729423  | 0.91470045  | C                                                     | 4.30246378  | 4.72142791  | 0.77884848  |
| C                                                     | 5.04759840  | 3.61815879  | 0.27893291  | H                                                     | 4.25275111  | 4.26118772  | 1.76158786  |
| H                                                     | 4.79919318  | 3.97352502  | 1.27445006  | H                                                     | 4.86623325  | 4.05696176  | 0.13154213  |
| H                                                     | 6.12480804  | 3.48758888  | 0.23425136  | H                                                     | 4.86062568  | 5.65009730  | 0.86900261  |
| H                                                     | 4.78201553  | 4.39187423  | -0.43425463 | C                                                     | 3.00849165  | 5.64908047  | -1.15918013 |
| C                                                     | 4.74775966  | 1.86155486  | -1.46156486 | H                                                     | 3.55207702  | 5.02640988  | -1.86207909 |
| H                                                     | 5.82882453  | 1.78410554  | -1.54339047 | H                                                     | 2.02622887  | 5.84495873  | -1.57985934 |
| H                                                     | 4.33070739  | 0.89631726  | -1.72840166 | H                                                     | 3.53765289  | 6.59563807  | -1.08492182 |
| H                                                     | 4.40613289  | 2.58708933  | -2.19412515 | H                                                     | 3.33142756  | 2.75142295  | -1.46027498 |
| Imaginary frequency : 334i cm <sup>-1</sup>           |             |             |             | Imaginary frequency : 373i cm <sup>-1</sup>           |             |             |             |

**Table S29.** Electronic energies (in a.u.), configurations, and configuration weights for **COT** at SA3-CASSCF(8,8)/ANO-RCC-VTZP level. Absolute energies at MS3-CASPT2(8,8)/ANO-RCC-VTZP level. The optimized state is shown in italics and the remaining states are single point energies from the optimized state.

| Geometry                                                 | State                | SA-CASSCF          | MS-CASPT2          | Conf            | weight      | Conf            | weight      |
|----------------------------------------------------------|----------------------|--------------------|--------------------|-----------------|-------------|-----------------|-------------|
| <b>S<sub>0</sub>, <i>D<sub>8h</sub></i><sup>a)</sup></b> | <i>S<sub>0</sub></i> | <i>-307.838915</i> | <i>-309.004902</i> | <i>22220000</i> | <i>0.40</i> | <i>222ud000</i> | <i>0.40</i> |
|                                                          | S <sub>1</sub>       | -307.790473        | -308.973939        | 22220000        | 0.39        | 22202000        | 0.39        |
|                                                          | S <sub>2</sub>       | -307.731516        | -308.963461        | 222ud000        | 0.93        |                 |             |
| <b>S<sub>0</sub>, <i>D<sub>2d</sub></i><sup>b)</sup></b> | <i>S<sub>0</sub></i> | <i>-307.859909</i> | <i>-309.034762</i> | <i>22220000</i> | <i>0.83</i> |                 |             |
|                                                          | S <sub>1</sub>       | -307.641484        | -308.892022        | 222ud000        | 0.93        |                 |             |
|                                                          | S <sub>2</sub>       | -307.624044        | -308.814408        | 22202000        | 0.54        |                 |             |
| <b>S<sub>1</sub></b>                                     | S <sub>0</sub>       | -307.838911        | -309.004935        | 22220000        | 0.33        | 22202000        | 0.33        |
|                                                          | <i>S<sub>1</sub></i> | <i>-307.790481</i> | <i>-308.973916</i> | <i>22220000</i> | <i>0.39</i> | <i>22202000</i> | <i>0.39</i> |
|                                                          | S <sub>2</sub>       | -307.731679        | -308.963946        | 222ud000        | 0.78        |                 |             |
| <b>T<sub>1</sub></b>                                     | <i>T<sub>1</sub></i> | <i>-307.816374</i> | <i>-308.994109</i> | <i>222uu000</i> | <i>0.81</i> |                 |             |
|                                                          | T <sub>2</sub>       | -307.711955        | -308.881235        | 2u2u2000        | 0.18        | 22u2u000        | 0.18        |
|                                                          | T <sub>3</sub>       | -307.711955        | -308.881234        | 2u22u000        | 0.18        | 22uu2000        | 0.18        |

<sup>a)</sup> The *D<sub>8h</sub>* symmetric structure is antiaromatic as evidenced by NICS (see the next section).

<sup>b)</sup> Geometry optimized at B3LYP/6-311+G(d,p) level. This structure is the global minimum for COT in the S<sub>0</sub> state.

**Table S30.** Electronic energies (in a.u.), configurations, and configuration weights for **COTH<sup>+</sup>** at SA3-CASSCF(6,7)/ANO-RCC-VTZP level. Absolute energies at MS3-CASPT2(6,7)/ANO-RCC-VTZP level. The optimized state is shown in italics and the remaining states are single point energies.

| Geometry                                                 | State                | SA-CASSCF           | MS-CASPT2           | Conf           | weight       | Conf    | weight |
|----------------------------------------------------------|----------------------|---------------------|---------------------|----------------|--------------|---------|--------|
| <b>S<sub>0</sub>, <i>C<sub>2v</sub></i><sup>a)</sup></b> | <i>S<sub>0</sub></i> | <i>-308.1626015</i> | <i>-309.3452757</i> | <i>2220000</i> | <i>0.871</i> |         |        |
|                                                          | S <sub>1</sub>       | -308.0731349        | -309.2695129        | 22ud000        | 0.810        |         |        |
|                                                          | S <sub>2</sub>       | -308.0285916        | -309.2171277        | 2202000        | 0.507        | 2u2d000 | 0.17   |
| <b>S<sub>0</sub>, <i>HA</i><sup>b)</sup></b>             | <i>S<sub>0</sub></i> | <i>-308.1626015</i> | <i>-309.3452757</i> | <i>2220000</i> | <i>0.87</i>  |         |        |
|                                                          | S <sub>1</sub>       | -308.0731349        | -309.2695129        | 22ud000        | 0.81         |         |        |
|                                                          | S <sub>2</sub>       | -308.0285916        | -309.2171277        | 2202000        | 0.51         | 2u2d000 | 0.17   |
| <b>S<sub>1</sub></b>                                     | S <sub>0</sub>       | -308.151338         | -309.338617         | 2220000        | 0.86         |         |        |
|                                                          | <i>S<sub>1</sub></i> | <i>-308.082981</i>  | <i>-309.280353</i>  | <i>22ud000</i> | <i>0.81</i>  |         |        |
|                                                          | S <sub>2</sub>       | -308.041510         | -309.233301         | 2202000        | 0.58         | 2u2d000 | 0.11   |
| <b>T<sub>1</sub></b>                                     | <i>T<sub>1</sub></i> | <i>-308.1193603</i> | <i>-309.3001756</i> | <i>22uu000</i> | <i>0.87</i>  |         |        |
|                                                          | T <sub>2</sub>       | -308.0480381        | -309.2271692        | 2u2u000        | 0.65         | 22u00u0 | 0.20   |
|                                                          | T <sub>3</sub>       | -308.0142358        | -309.1915291        | u22u000        | 0.64         |         |        |

<sup>a)</sup> The *C<sub>2v</sub>* symmetric structure is antiaromatic as evidenced by NICS (see the next section).

<sup>b)</sup> Geometry optimized at B3LYP/6-311+G(d,p) level. This structure is homoaromatic and it is the global minimum in the S<sub>0</sub> state.

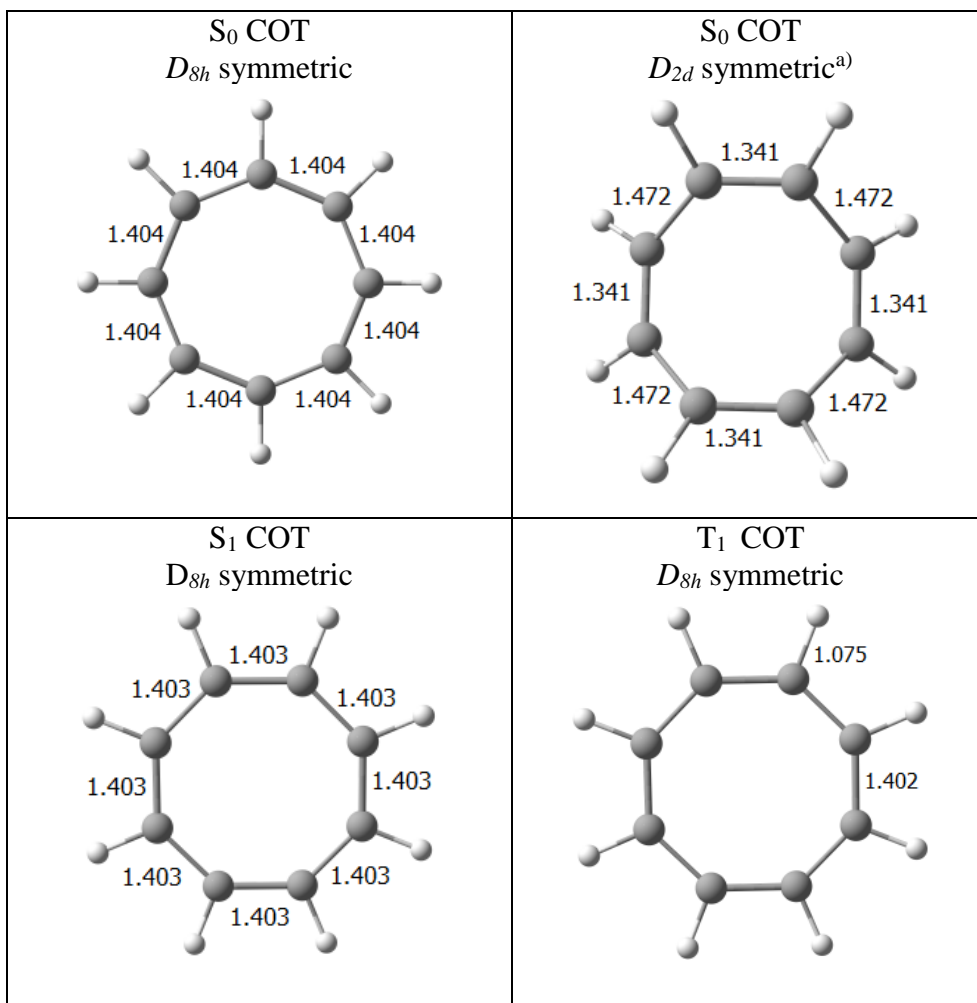

**Figure S45.** Optimized geometries for **cyclooctatetraene (COT)** in the  $S_0$ ,  $S_1$ , and  $T_1$  states optimized at SA3-CASSCF/ANO-RCC-VTZP level. <sup>a)</sup>  $S_0$   $D_{2d}$  symmetric was optimized at B3LYP/6-311+G(d,p).

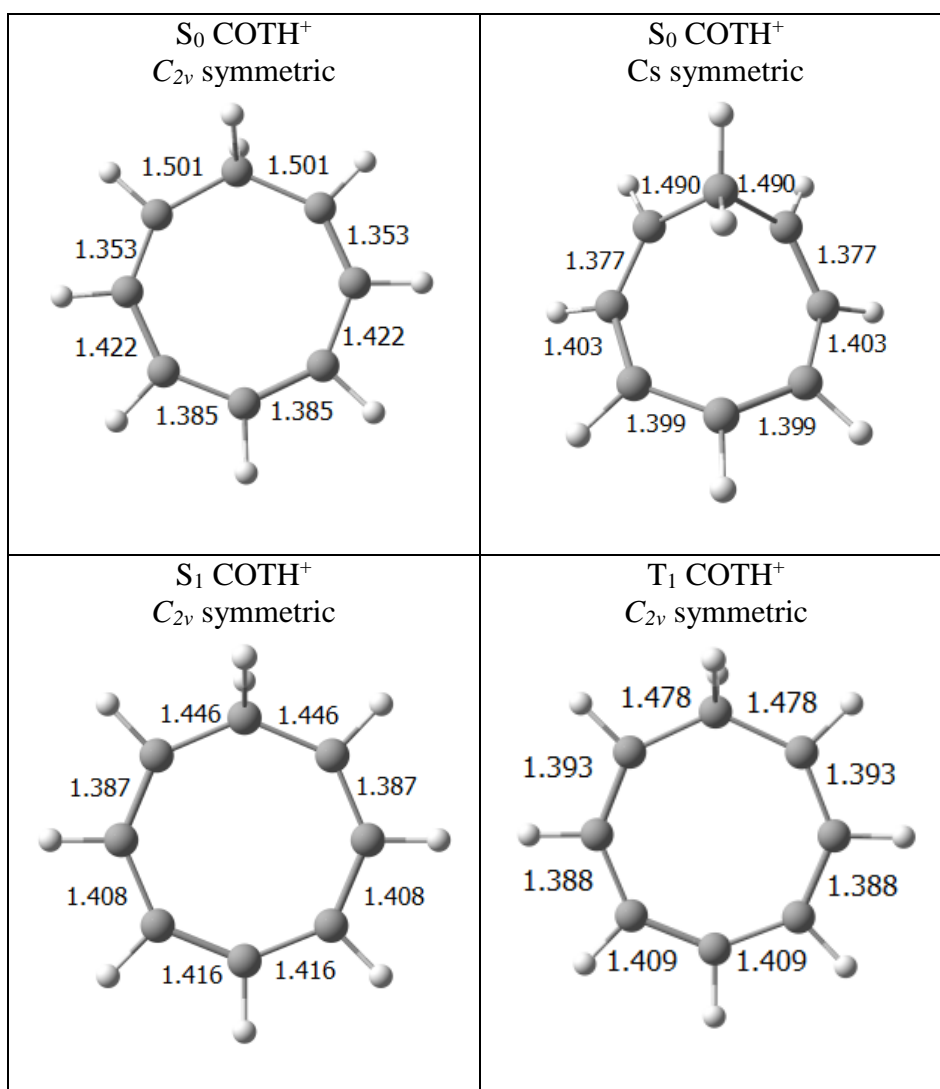

**Figure S46.** Optimized geometries for **protonated cyclooctatetraene (COTH<sup>+</sup>)** in the  $S_0$ ,  $S_1$ , and  $T_1$  states optimized at SA3-CASSCF/ANO-RCC-VTZP level. <sup>a)</sup>  $S_0$   $C_s$  symmetric was optimized at B3LYP/6-311+G(d,p).

**Table S31.** Cartesian coordinates for **cyclooctatetraene (COT)** in the  $S_0$ ,  $S_1$ , and  $T_1$  states calculated at SA3-CASSCF(8,8)/ANO-RCC-VTZP and respective energies. The absolute energies are given at MS3-CASPT2(8,8)/ANO-RCC-VTZP level.

|                                                       |             |             |             |                                                                                               |             |             |             |
|-------------------------------------------------------|-------------|-------------|-------------|-----------------------------------------------------------------------------------------------|-------------|-------------|-------------|
| <b>COT <math>S_0</math> <math>D_{8h}</math> state</b> |             |             |             | <b>COT <math>S_0</math> <math>D_{2d}</math> state (optimized at B3LYP/6-311+G(d,p) level)</b> |             |             |             |
| E : -309.00490189 a.u.                                |             |             |             | E : -309.03476196 a.u.                                                                        |             |             |             |
| C                                                     | -1.29713112 | 1.29713230  | -0.00000000 | C                                                                                             | -0.37388000 | -0.67058000 | 1.56754000  |
| C                                                     | -0.00000034 | 1.83442179  | 0.00000000  | C                                                                                             | -0.37388000 | 0.67058000  | 1.56754000  |
| C                                                     | 0.00000047  | -1.83442201 | 0.00000000  | C                                                                                             | -0.37388000 | -0.67058000 | -1.56754000 |
| C                                                     | 1.29713372  | 1.29713236  | -0.00000000 | C                                                                                             | 0.37388000  | 1.56754000  | 0.67058000  |
| C                                                     | 1.29713124  | -1.29713255 | -0.00000000 | C                                                                                             | -0.37388000 | 0.67058000  | -1.56754000 |
| C                                                     | 1.83442208  | 0.00000110  | 0.00000000  | C                                                                                             | 0.37388000  | 1.56754000  | -0.67058000 |
| C                                                     | -1.83442215 | -0.00000073 | -0.00000000 | C                                                                                             | 0.37388000  | -1.56754000 | -0.67058000 |
| C                                                     | -1.29713376 | -1.29713242 | 0.00000000  | C                                                                                             | 0.37388000  | -1.56754000 | -0.67058000 |
| H                                                     | 0.00000037  | -2.90909007 | 0.00000000  | H                                                                                             | -0.91859000 | -1.17285000 | -2.36589000 |
| H                                                     | 2.05703637  | -2.05703683 | -0.00000000 | H                                                                                             | -0.91859000 | 1.17285000  | -2.36589000 |
| H                                                     | 2.90909019  | 0.00000059  | 0.00000000  | H                                                                                             | 0.91859000  | 2.36589000  | -1.17285000 |
| H                                                     | 2.05703758  | 2.05703775  | -0.00000000 | H                                                                                             | 0.91859000  | 2.36589000  | 1.17285000  |
| H                                                     | -0.00000023 | 2.90908980  | 0.00000000  | H                                                                                             | -0.91859000 | 1.17285000  | 2.36589000  |
| H                                                     | -2.05703629 | 2.05703657  | -0.00000000 | H                                                                                             | -0.91859000 | -1.17285000 | 2.36589000  |
| H                                                     | -2.05703786 | -2.05703758 | -0.00000000 | H                                                                                             | 0.91859000  | -2.36589000 | 1.17285000  |
| H                                                     | -2.90909025 | -0.00000006 | 0.00000000  | H                                                                                             | 0.91859000  | -2.36589000 | -1.17285000 |
| <b>COT <math>S_1</math> state</b>                     |             |             |             | <b>COT <math>T_1</math> state</b>                                                             |             |             |             |
| E : -308.97391627 a.u.                                |             |             |             | E : -308.99410912 a.u.                                                                        |             |             |             |
| C                                                     | -1.29627773 | 1.29627779  | -0.00000000 | C                                                                                             | -1.29546180 | 1.29546171  | -0.00000001 |
| C                                                     | -0.00000036 | 1.83321427  | 0.00000000  | C                                                                                             | 0.00000021  | 1.83205922  | -0.00000000 |
| C                                                     | -0.00000026 | -1.83321255 | 0.00000000  | C                                                                                             | -0.00000008 | -1.83205890 | -0.00000001 |
| C                                                     | 1.29627892  | 1.29627838  | -0.00000000 | C                                                                                             | 1.29546168  | 1.29546163  | 0.00000001  |
| C                                                     | 1.29627858  | -1.29627841 | -0.00000000 | C                                                                                             | 1.29546151  | -1.29546171 | -0.00000002 |
| C                                                     | 1.83321494  | 0.00000050  | -0.00000000 | C                                                                                             | 1.83205841  | -0.00000067 | 0.00000000  |
| C                                                     | -1.83321412 | -0.00000074 | 0.00000000  | C                                                                                             | -1.83205916 | -0.00000000 | 0.00000000  |
| C                                                     | -1.29627995 | -1.29627911 | -0.00000000 | C                                                                                             | -1.29546084 | -1.29546137 | 0.00000002  |
| H                                                     | -0.00000058 | -2.90768508 | 0.00000000  | H                                                                                             | 0.00000095  | -2.90668732 | -0.00000002 |
| H                                                     | 2.05604458  | -2.05604485 | -0.00000000 | H                                                                                             | 2.05533759  | -2.05533831 | -0.00000006 |
| H                                                     | 2.90768747  | 0.00000002  | 0.00000000  | H                                                                                             | 2.90668685  | -0.00000015 | 0.00000003  |
| H                                                     | 2.05604490  | 2.05604510  | 0.00000000  | H                                                                                             | 2.05533841  | 2.05533767  | 0.00000005  |
| H                                                     | 0.00000016  | 2.90768665  | -0.00000000 | H                                                                                             | -0.00000087 | 2.90668765  | -0.00000002 |
| H                                                     | -2.05604436 | 2.05604381  | -0.00000000 | H                                                                                             | -2.05533762 | -2.05533869 | -0.00000005 |
| H                                                     | -2.05604562 | -2.05604588 | -0.00000000 | H                                                                                             | -2.05533773 | -2.05533726 | 0.00000006  |
| H                                                     | -2.90768657 | 0.00000011  | 0.00000000  | H                                                                                             | -2.90668751 | -0.00000088 | 0.00000001  |

**Table S32.** Cartesian coordinates for **protonated cyclooctatetraene cation (COTH<sup>+</sup>)** in the  $S_0$ ,  $S_1$ , and  $T_1$  states calculated at SA3-CASSCF(6,6)/ANO-RCC-VTZP and respective energies. For CASSCF geometries absolute energies are given at MS3-CASPT2(6,6)/ANO-RCC-VTZP level.

|                                                                    |             |             |             |                                                                                                            |             |             |             |
|--------------------------------------------------------------------|-------------|-------------|-------------|------------------------------------------------------------------------------------------------------------|-------------|-------------|-------------|
| <b>COTH<sup>+</sup> <math>S_0</math> <math>D_{8h}</math> state</b> |             |             |             | <b>COTH<sup>+</sup> <math>S_0</math> <math>C_{2v}</math> state (optimized at B3LYP/6-311+G(d,p) level)</b> |             |             |             |
| E : -309.3452757 a.u.                                              |             |             |             | E : -309.38985452 a.u.                                                                                     |             |             |             |
| C                                                                  | 1.26986703  | 1.31107644  | 0.00000220  | C                                                                                                          | 0.14721000  | 1.42683000  | 0.00000000  |
| C                                                                  | -0.00000008 | 1.86284728  | 0.00000260  | C                                                                                                          | 1.16483000  | 0.47386000  | -0.12045000 |
| C                                                                  | 0.00000007  | -1.92790583 | 0.00000464  | C                                                                                                          | -1.45827000 | -0.59324000 | -1.69215000 |
| C                                                                  | -1.26986740 | 1.31107682  | 0.00000030  | C                                                                                                          | 1.10145000  | -0.91886000 | 0.00000000  |
| C                                                                  | -1.33932817 | -1.24944599 | -0.00000305 | C                                                                                                          | -1.19429000 | -1.64530000 | -0.67099000 |
| C                                                                  | -1.83983760 | 0.00794082  | -0.00000191 | C                                                                                                          | 0.00000000  | -1.78868000 | 0.00000000  |
| C                                                                  | 1.83983756  | 0.00794060  | -0.00000372 | C                                                                                                          | -1.24866000 | 1.28071000  | 0.00000000  |
| C                                                                  | 1.33932838  | -1.24944625 | -0.00000414 | C                                                                                                          | -2.00369000 | 0.34433000  | -0.67099000 |
| H                                                                  | 0.00000117  | -2.59432758 | 0.85616854  | H                                                                                                          | -2.20458000 | -0.89684000 | -2.42267000 |
| H                                                                  | -2.11195836 | -1.99786074 | -0.00000641 | H                                                                                                          | -1.98072000 | -2.36982000 | -0.48375000 |
| H                                                                  | -2.91183487 | 0.04378638  | -0.00000751 | H                                                                                                          | 0.13967000  | -2.72939000 | 0.52685000  |
| H                                                                  | -2.03215126 | 2.06904473  | 0.00000150  | H                                                                                                          | 2.05090000  | -1.38718000 | 0.24748000  |
| H                                                                  | 0.00000014  | 2.93506701  | 0.00000597  | H                                                                                                          | 2.16975000  | 0.88267000  | -0.08620000 |
| H                                                                  | 2.03215096  | 2.06904421  | 0.00000637  |                                                                                                            |             |             |             |

|                                             |              |              |              |                                             |             |             |             |
|---------------------------------------------|--------------|--------------|--------------|---------------------------------------------|-------------|-------------|-------------|
| H                                           | 2.11195872   | -1.99786091  | -0.00000913  | H                                           | 0.50009000  | 2.42495000  | 0.24748000  |
| H                                           | 2.91183478   | 0.04378653   | -0.00000770  | H                                           | -3.07256000 | 0.31409000  | -0.48375000 |
| H                                           | -0.00000108  | -2.59434138  | -0.85614856  | H                                           | -1.80536000 | 2.05178000  | 0.52685000  |
|                                             |              |              |              | H                                           | -0.55461000 | -0.22562000 | -2.17632000 |
| <b>COTH<sup>+</sup> S<sub>1</sub> state</b> |              |              |              | <b>COTH<sup>+</sup> T<sub>1</sub> state</b> |             |             |             |
| E : -309.28035320 a.u.                      |              |              |              | E : -309.30017557 a.u.                      |             |             |             |
| C                                           | 1.312432420  | 1.311617210  | -0.000052310 | C                                           | 1.31119789  | 1.30837836  | -0.00000164 |
| C                                           | 0.000000150  | 1.844370290  | -0.000022680 | C                                           | -0.00000086 | 1.82418312  | -0.00001114 |
| C                                           | -0.000000040 | -1.832817660 | 0.000058230  | C                                           | 0.00000014  | -1.89066291 | -0.00000800 |
| C                                           | -1.312432400 | 1.311616950  | 0.000002580  | C                                           | -1.31119856 | 1.30837846  | -0.00000281 |
| C                                           | -1.329021990 | -1.261811510 | 0.000042180  | C                                           | -1.33836565 | -1.26306570 | 0.00000813  |
| C                                           | -1.866202430 | 0.016832760  | 0.000004720  | C                                           | -1.85330041 | 0.03094043  | 0.00000975  |
| C                                           | 1.866202340  | 0.016832820  | 0.000038150  | C                                           | 1.85330107  | 0.03094009  | 0.00000974  |
| C                                           | 1.329021830  | -1.261811410 | 0.000090300  | C                                           | 1.33836634  | -1.26306630 | 0.00000955  |
| H                                           | -0.000004000 | -2.558936700 | 0.829864800  | H                                           | -0.00000052 | -2.57557916 | 0.84968722  |
| H                                           | -2.070567400 | -2.039017130 | -0.000004710 | H                                           | -2.10224647 | -2.01759316 | 0.00001353  |
| H                                           | -2.939161830 | 0.016381240  | 0.000015350  | H                                           | -2.92701113 | 0.04269736  | 0.00001308  |
| H                                           | -2.064364120 | 2.076002410  | 0.000013710  | H                                           | -2.05228304 | 2.08331155  | -0.00000452 |
| H                                           | 0.000000040  | 2.916416710  | -0.000017160 | H                                           | -0.00000001 | 2.89869522  | -0.00001976 |
| H                                           | 2.064364310  | 2.076002600  | -0.000099770 | H                                           | 2.05228271  | 2.08331138  | -0.00000472 |
| H                                           | 2.070567360  | -2.039016960 | 0.000165180  | H                                           | 2.10224675  | -2.01759415 | 0.00001214  |
| H                                           | 2.939161730  | 0.016381170  | -0.000040500 | H                                           | 2.92701177  | 0.04269755  | 0.00001570  |
| H                                           | 0.000004060  | -2.558620640 | -0.830058060 | H                                           | -0.00000003 | -2.57555001 | -0.84972625 |

## 7.6 Rationalization of the barrier in the S<sub>1</sub> state

**Table S24** above shows the electron configurations of the S<sub>1</sub> states and their respective weights at the vertically excited and at the minima of the investigated molecules. As mentioned in the main text, due its high symmetry ( $D_{6h}$ ) benzene in the S<sub>1</sub> state (the  $1^1B_{2u}$  state) is described by two degenerate configurations of equal weights in an in-phase coupling. The out-of-phase coupling of the two configurations contributes to the  $1^1E_{1u}$  state which is of higher energy. Thus, the splitting between the  $1^1B_{2u}$  and  $1^1E_{1u}$  states reflects the strengths of the coupling between the two configurations, and as pointed by Sobolewski *et al.*,<sup>50</sup> it stabilizes the S<sub>1</sub> state of benzene at its  $D_{6h}$  minimum. However, as there is a symmetry reduction along the reaction coordinate the energies of the two configurations become unequal and as a consequence the weights of the two configurations describing the S<sub>1</sub> state (the former  $1^1B_{2u}$  state) become unequal.

Silabenzene and the pyridinium ion have lower symmetry (their highest symmetry is  $C_{2v}$ ), and as a consequence, the two configurations have *per se* different weights at their S<sub>1</sub> state

minimum geometries. Thus, as seen in **Table S24** the difference in weights between the two configurations increases as one goes from silabenzene to the pyridinium ion. The stabilizing in-phase coupling between the two configurations in the  $S_1$  state should be smaller in silabenzene and the pyridinium ion than in benzene, and as a result, the activation barrier will be lower or even negligible. The difference in the weights in the  $S_1$  states of the two substituted benzenes (TMS-benzene and *t*Bu-benzene) is smaller than in the two heterocycles, yet, it is still noticeable. Of the two substituted benzenes, the difference in weights of the configurations is slightly larger for TMS-benzene.

This explains the reduced activation barriers for TMS-benzene and *t*-Bu benzene, and the lack of activation barriers for silabenzene and the pyridinium ion. Thus, it seems that the larger barrier in benzene is an effect of the stabilization created by the two degenerated configurations at  $D_{6h}$  symmetry: while the avoided crossing creates a barrier, the presence of two degenerated configurations at the  $D_{6h}$  dictates the height of the barrier.

### 7.7 Aromaticity index (NICS(1)<sub>zz</sub>, MCI and FLU values)

**Table S33.** NICS(1)<sub>zz</sub> values for benzene in the  $S_1$  and  $S_0$  states computed at the CASSCF/6-311++G(d,p)//CASSCF/ANO-RCC-VTZP level.

| State                     | Geometry    | NICS(1) <sub>zz</sub> |
|---------------------------|-------------|-----------------------|
| $S_0$                     | $S_0$ min   | -27.4                 |
| $S_1$                     | $S_0$ min   | 99.5                  |
| $S_1$                     | $S_1$ min   | 80.9                  |
| $S_0$                     | $S_1$ min   | -25.5                 |
| TS- $S_1$ <sup>a)</sup>   | TS in $S_1$ | -21.2                 |
| “TS”- $S_0$ <sup>a)</sup> | TS in $S_1$ | -10.0                 |

- a) The structure that corresponds to the CASSCF maximum on the  $S_1$  state potential energy surface. See Figure 4.



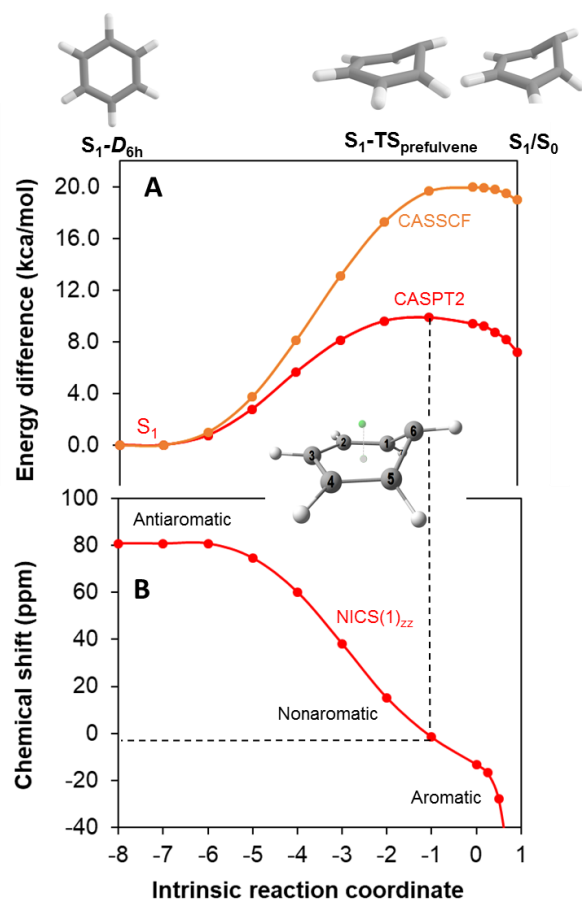

**Figure S47.** (A) Intrinsic reaction coordinate for benzene from the planar  $S_1$  state minimum ( $D_{6h}$  symmetry) to the  $S_1/S_0$  conical intersection. (B) The corresponding  $NICS(1)_{zz}$  values towards the upper direction, as shown in the inserted picture. Geometries calculated at SA4-CASSCF(6,6)/ANO-RCC-VTZP level and energies obtained at MS4-CASPT2(6,6)/ANO-RCC-VTZP level and  $NICS(1)_{zz}$  values at CASSCF(6,6)/6-31++G(d,p) level. It is noteworthy that the TS geometry optimization and IRC calculations were performed at SA4-CASSCF level and the respective energies were computed at MS4-CASPT2 level. This is the reason why the TS at the CASSCF level does not corresponds exactly to the maximum energy point at CASPT2 level.

**Table S34**  $NICS(1)_{zz}$  values (in ppm) for benzene, benzenium cation, COT, and  $COTH^+$  computed at three different levels: B3LYP/6-311+G(d,p)//B3LYP/6-311+G(d,p), CASSCF/6-31++G(d,p)//B3LYP/6-311+G(d,p), and CASSCF/6-31++G(d,p)//SA-CASSCF/ANO-RCC-VTZP. Unrestricted wavefunction was used to compute the triplets and TD-DFT was used for the singlet geometries. The symmetry of each specie is given in parenthesis.

| State | Level of calculation<br>( $NICS(1)_{zz}$ //geometry) | Benzene | Benzenium<br>cation | COT | $COTH^+$ |
|-------|------------------------------------------------------|---------|---------------------|-----|----------|
|       | B3LYP/B3LYP                                          | -29.2   | -14.1               | 6.2 | 36.4     |

|       |               |                          |                         |                       |                         |
|-------|---------------|--------------------------|-------------------------|-----------------------|-------------------------|
|       |               | ( $D_{6h}$ )             | ( $C_{2v}$ )            | ( $D_{2d}$ )          | ( $C_{2v}, i$ )         |
|       |               |                          |                         |                       | -27.4<br>( $C_s, HA$ )  |
| $S_0$ | CASSCF/B3LYP  | -27.3<br>( $D_{6h}$ )    | -11.3<br>( $C_{2v}$ )   | 99.1<br>( $D_{8h}$ )  | 21.0<br>( $C_{2v}, i$ ) |
|       |               |                          |                         | 1.27<br>( $D_{2d}$ )  | -5.5<br>( $C_s, HA$ )   |
|       | CASSCF/CASSCF | -27.4<br>( $D_{6h}$ )    | -10.8<br>( $C_{2v}$ )   | 99.1<br>( $D_{8h}$ )  | 20.1<br>( $C_{2v}$ )    |
| $S_1$ | CASSCF/B3LYP  | 83.2<br>( $D_{6h}$ )     | 27.6<br>( $C_{2v}, i$ ) | -26.3<br>( $D_{8h}$ ) | -45.0<br>( $C_{2v}$ )   |
|       | CASSCF/CASSCF | 80.9<br>( $D_{6h}$ )     | 24.0<br>( $C_{2v}$ )    | -26.4<br>( $D_{8h}$ ) | -42.6<br>( $C_{2v}$ )   |
| $T_1$ | B3LYP/B3LYP   | 66.9<br>( $D_{2h}, AQ$ ) | 16.6<br>( $C_{2v}, i$ ) | -32.5<br>( $D_{8h}$ ) | -13.3<br>( $C_{2v}$ )   |
|       |               |                          | -5.3<br>( $C_s, HA$ )   |                       |                         |
|       | CASSCF/B3LYP  | 40.4<br>( $D_{2h}, AQ$ ) | 12.1<br>( $C_{2v}, i$ ) | -25.6<br>( $D_{8h}$ ) | -10.3<br>( $C_{2v}$ )   |
|       |               |                          | -7.8<br>( $C_s, HA$ )   |                       |                         |
|       | CASSCF/CASSCF | 49.7<br>( $D_{2h}, AQ$ ) | 11.4<br>( $C_{2v}$ )    | -25.6<br>( $D_{8h}$ ) | -9.6<br>( $C_{2v}$ )    |

HA = homoaromatic structure; AQ = antiquinoidal;  $i$  = structure presents imaginary frequency.

**Table S35** NICS(1)<sub>zz</sub> values for the  $S_1$  state of TMS-benzene,  $t$ -Bu benzene, toluene, and silylbenzene computed at CASSCF(6,6)/6-31++G(d,p) level at the geometries obtained with SA-CASSCF/ANO-RCC-VDZP for TMS-benzene and  $t$ -Bu-benzene and at SA-CASSCF/ANO-RCC-VTZP for benzene, pyridinium ion, and silabenzene.

| NICS(1) <sub>zz</sub> | Benzene | Pyridinium ion | Silabenzene | TMS-benzene | $t$ -Bu-benzene |
|-----------------------|---------|----------------|-------------|-------------|-----------------|
| $S_1$ vertical        | 99.5    | 113.3          | 99.3        | 97.0        | 97.1            |
| $S_1$ minimum         | 80.9    | 91.2           | 33.0        | 78.8        | 79.0            |

**Table S36** MCI and FLU computed for benzene, benzenium ion, COT, and COTH<sup>+</sup> at CASSCF/ANO-RCC-VTZP//B3LYP/6-311+G(d,p) level. Normalized values for MCI are shown in italics between parenthesis and given as MCI<sup>1/n</sup>.<sup>65</sup>

|                |     | <b>Benzene</b>                                      | <b>Benzenium ion</b>                                       | <b>COT</b>                                           | <b>COTH<sup>+</sup></b>                              |
|----------------|-----|-----------------------------------------------------|------------------------------------------------------------|------------------------------------------------------|------------------------------------------------------|
| S <sub>0</sub> | MCI | 0.0429<br><i>(0.592)</i><br><i>(D<sub>6h</sub>)</i> | 0.0034<br><i>(0.388)</i><br><i>(C<sub>2v</sub>)</i>        | 0.00053<br><i>(0.389)</i><br><i>(D<sub>2d</sub>)</i> | 0.0217<br><i>(0.578)</i><br><i>(C<sub>s</sub>)</i>   |
|                | FLU | 0.0062                                              | 0.0284                                                     | 0.0316                                               | 0.0278                                               |
| S <sub>1</sub> | MCI | 0.0038<br><i>(0.395)</i><br><i>(D<sub>6h</sub>)</i> | <i>0.0166</i><br><i>(0.505)</i><br><i>(C<sub>2v</sub>)</i> | 0.00353<br><i>(0.493)</i><br><i>(D<sub>8h</sub>)</i> | 0.00061<br><i>(0.396)</i><br><i>(C<sub>2v</sub>)</i> |
|                | FLU | 0.0249                                              | 0.0392                                                     | 0.0102                                               | 0.0218                                               |

\*Larger MCI values and smaller FLU values (typically close to zero) indicates larger aromaticity character.

## 7.8 Approximate estimate of the S<sub>1</sub> state ESAA relief energy

The barrier in the S<sub>1</sub> state is a composite energy which we here consider as split into (i) one component representing the increase in strain in the  $\sigma$ -orbital framework when going from the hexagonal structure, which is ideal four six sp<sup>2</sup> hybridized C atoms, to a puckered structure, and (ii) one component that represents the energy relieved upon alleviation of ESAA. From our CASSCF calculations we observe that the C-C  $\sigma$ -orbitals are not involved in the excitation representing the S<sub>1</sub> state. Based on this we can conclude that the  $\sigma$ -strain in the puckered structure of the S<sub>1</sub> state TS is the same in the S<sub>1</sub> and S<sub>0</sub> states. Now, if we assume that the benzene molecule in its S<sub>0</sub> state loses all its aromatic stabilization energy upon the puckering, then we can set the GSA loss to 36 kcal/mol.<sup>66</sup> Based on this value, together with the energy differences between the two structures in S<sub>1</sub> (84.3 kcal/mol) and in S<sub>0</sub> (9.4 kcal/mol), we can deduce in an approximate manner that the  $\sigma$ -strain energy equals ~53 kcal/mol and that the ESAA relief should be ~43 kcal/mol.

Moreover, in the S<sub>1</sub> state the ESAA relief when going from the S<sub>1</sub> state minimum to the S<sub>1</sub> transition state structure at CASSCF level is revealed through a change in the NICS(1)<sub>zz</sub> values from 80.9 ppm (strongly antiaromatic) to -21.2 ppm (aromatic). Indeed, a slight ESAA relief is already established when going from the vertically excited S<sub>1</sub> state structure (99.5 ppm) to the relaxed S<sub>1</sub> state structure. In contrast, when using the S<sub>1</sub> state minimum structure and the S<sub>1</sub> state TS structure for S<sub>0</sub> state NICS calculations we observe a significant aromaticity loss as the NICS(1)<sub>zz</sub> value changes from -25.5 ppm to -10.0 ppm. Interestingly, the S<sub>0</sub> state aromaticity loss according to NICS when going from the S<sub>0</sub> state minimum structure (-27.4 ppm) to the structure which is the optimum in the S<sub>1</sub> state is minute ( $\Delta$ NICS = 1.9 ppm).

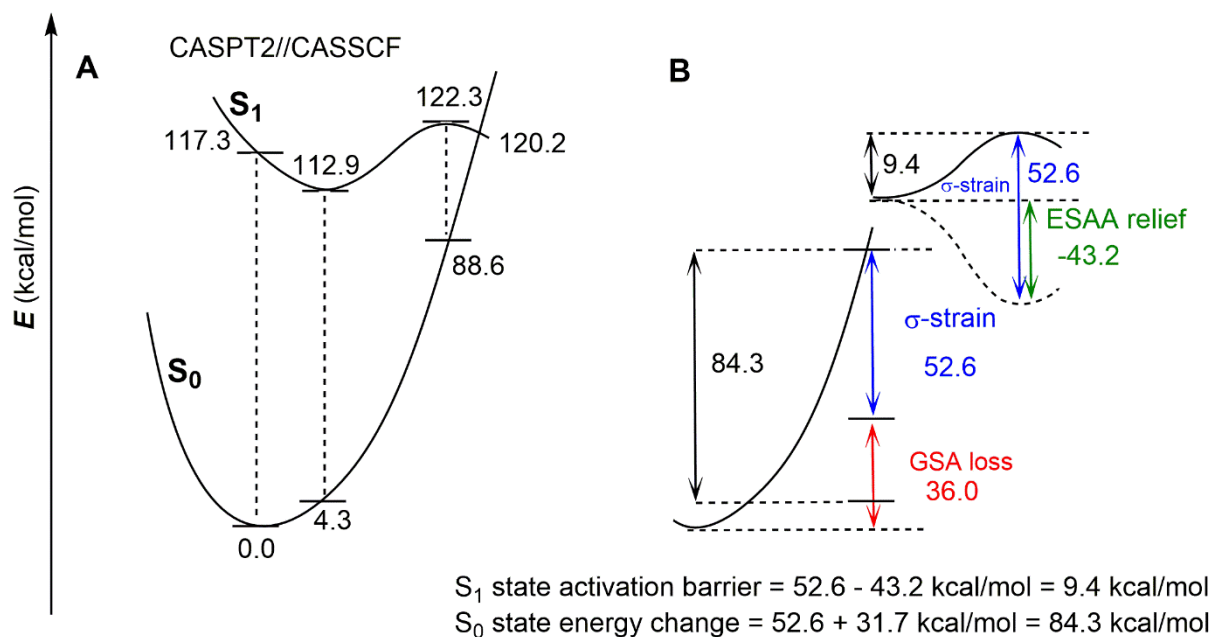

**Figure S48.** (A) Schematic drawing of the potential energy surfaces of benzene in the  $S_1$  state and with the corresponding  $S_0$  state energies as single-point energies at the  $S_1$  state structures. Electronic energies at MS-CASPT2/ANO-RCC-VTZP//SA-CASSCF/ANO-RCC-VTZP level relative to the energy of the  $S_1$  state minimum structure. (B) Estimation of the excited state antiaromaticity (ESAA) relief and  $\sigma$ -strain energies based on the calculated energy difference between the two structures in  $S_1$  and  $S_0$  as well as the ground state aromaticity (GSA) loss taken as the experimentally determined aromatic stabilization energy of benzene in the  $S_0$  state, reported as 36 kcal/mol.<sup>66</sup>

### 7.9 Protonation of benzene and COT

**Table S34** above shows the computed NICS(1)<sub>zz</sub> values for benzene, benzenium cation, COT, and COTH<sup>+</sup> computed at three different levels and respective symmetries of the species. First of all, one can notice the sensibility of NICS(1)<sub>zz</sub> values with the levels of calculation.<sup>67</sup> However, the overall behavior remains the same, *i.e.*  $\Delta$ NICS(1)<sub>zz</sub> values (computed as the difference between protonated and non-protonated species at each state) are positive when aromaticity is lost and negative when aromaticity is gained under protonation. In this way, one can notice an inverse behavior for benzene and COT in the ground and excited states, also reflected in their proton affinities (**Table S37**). The only exception occurs for the protonation of COT in the  $S_1$  state where one should expect a less negative value upon protonation. In fact, MCI values reveal the expected (opposite) behavior (**Table S36**) with a decrease in aromaticity

after protonation. The outlying NICS(1)<sub>zz</sub> value could be attributed to an underestimated value of COT in the S<sub>1</sub> state due to methodological constraints (the S<sub>1</sub> state in COT is doubly excited (see **Table S29**) and (nearly)degenerated with the S<sub>2</sub> state). Noteworthy, when comparing the hydrogen isotropic shieldings between C<sub>6</sub>H<sub>7</sub><sup>+</sup> in the S<sub>0</sub> and COTH<sup>+</sup> in the S<sub>1</sub> their "equivalent" protons are shifted in the same direction and Mulliken charge distribution presents the same distribution pattern in both species indicating similar chemical environment.

Another feature to note is that for COTH<sup>+</sup> in the S<sub>0</sub> and benzenium cation in the T<sub>1</sub> state two NICS(1)<sub>zz</sub> values are given and associated with two different geometries. One can see dramatic changes in their NICS(1)<sub>zz</sub> values, going from positive to negative values. The reason is that these molecules become homoaromatic (HA), *i.e.*, they present cyclic through-space conjugation, as already investigated by Jorner *et. al.*<sup>68</sup> and represented in **Figure S49**. Based on the similarities with the T<sub>1</sub> state (minimum energy structure is puckered with similar C---C through-space distance, imaginary frequency at C<sub>2v</sub> symmetric structure), one can argue that the benzenium cation in its S<sub>1</sub> state is also homoaromatic. However, for methodologic limitations, it is impossible to obtain the NICS(1)<sub>zz</sub> value for this species as it is located very close to the conical intersection, *i.e.*, it would need a state-average description which is not available in the Dalton program.

|                                                                                                                                               |                                                                                                                                               |                                                                                                                                                    |
|-----------------------------------------------------------------------------------------------------------------------------------------------|-----------------------------------------------------------------------------------------------------------------------------------------------|----------------------------------------------------------------------------------------------------------------------------------------------------|
| <p><b>Benzenium ion S<sub>1</sub>, C<sub>2v</sub></b></p> 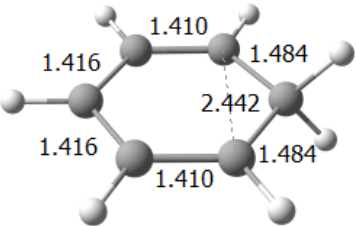 | <p><b>Benzenium ion T<sub>1</sub>, C<sub>2v</sub></b></p>  | <p><b>COTH<sup>+</sup> S<sub>0</sub>, C<sub>2v</sub></b></p>  |
| <p><b>Benzenium ion S<sub>1</sub>, HA</b></p>                                                                                                 | <p><b>Benzenium ion T<sub>1</sub>, HA</b></p>                                                                                                 | <p><b>COTH<sup>+</sup> S<sub>0</sub>, HA</b></p>                                                                                                   |

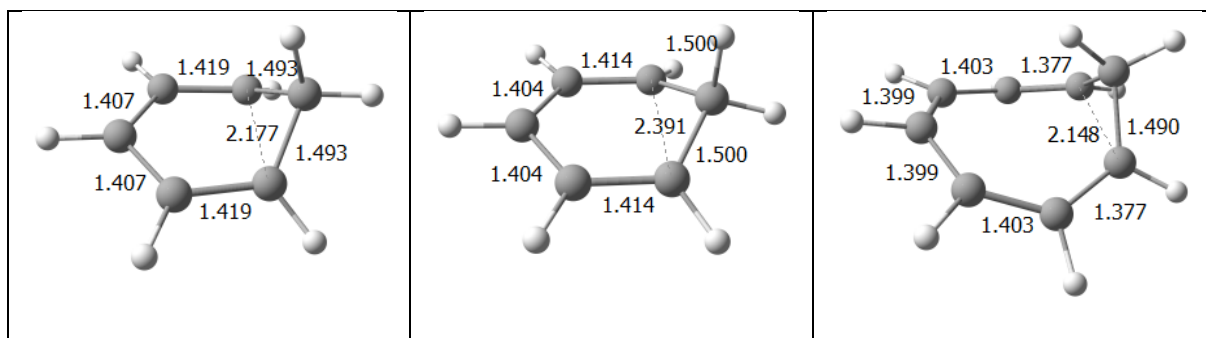

**Figure S49.** Geometries for benzenium cation in the  $S_1$  and  $T_1$  state and  $\text{COH}^+$  in the  $S_0$  state:  $C_{2v}$  structures (above) presenting imaginary frequencies and homoaromatic (HA) geometries (below) which are global minima calculated at B3LYP/6-311+G(d,p) level.

### 7.10 Proton affinities

**Table S37** Calculated gas phase proton affinities (kcal/mol) in the  $S_0$ ,  $S_1$ , and  $T_1$  states calculated at (U)- and (TD-)B3LYP/6-311+G(d,p) levels.

| Compound          | $S_0$ | $S_1$                 | $T_1$                 |
|-------------------|-------|-----------------------|-----------------------|
| Benzene           | 183.1 | 214.7 ( $C_{2v}, i$ ) | 217.0 ( $C_{2v}, i$ ) |
|                   |       | 232.1 ( $C_s$ )       | 218.4 ( $C_s$ )       |
| Cyclooctatetraene | 220.8 | 182.8                 | 195.0                 |
| Benzvalene        | 243.6 |                       |                       |

The calculated gas phase proton affinity in the  $S_1$  state increases further for TMS and *t*Bu monosubstituted benzenes as their gas phase proton affinities, varying with the protonation site (*ortho*-, *meta*- or *para*-), are found in the ranges 258 – 265 and 243 – 248 kcal/mol, respectively (**Table S38**). The protonated TMS-benzene in the  $S_1$  state would relax to either an  $S_1$  state homoaromatic minimum or to a conical intersection located very nearby.

**Table S38.** Proton affinities (kcal/mol) in the  $S_1$  states of substituted benzenes calculated at B3LYP/6-311+G(d,p) level in the gas phase.

| Molecule             | Ips0  | Ortho | Meta  | Para  |
|----------------------|-------|-------|-------|-------|
| TMS-benzene          | 257.9 | 260.9 | 265.4 | 262.1 |
| <i>t</i> -Bu-Benzene | 242.8 | 243.3 | 247.9 | 245.0 |

## 8. Spectra

**Figure S50:**  $^1\text{H}$  NMR spectrum of **1d** in  $\text{CDCl}_3$ . Signals with asterisk symbol depicts minor stereoisomers inseparable by repeated chromatography.

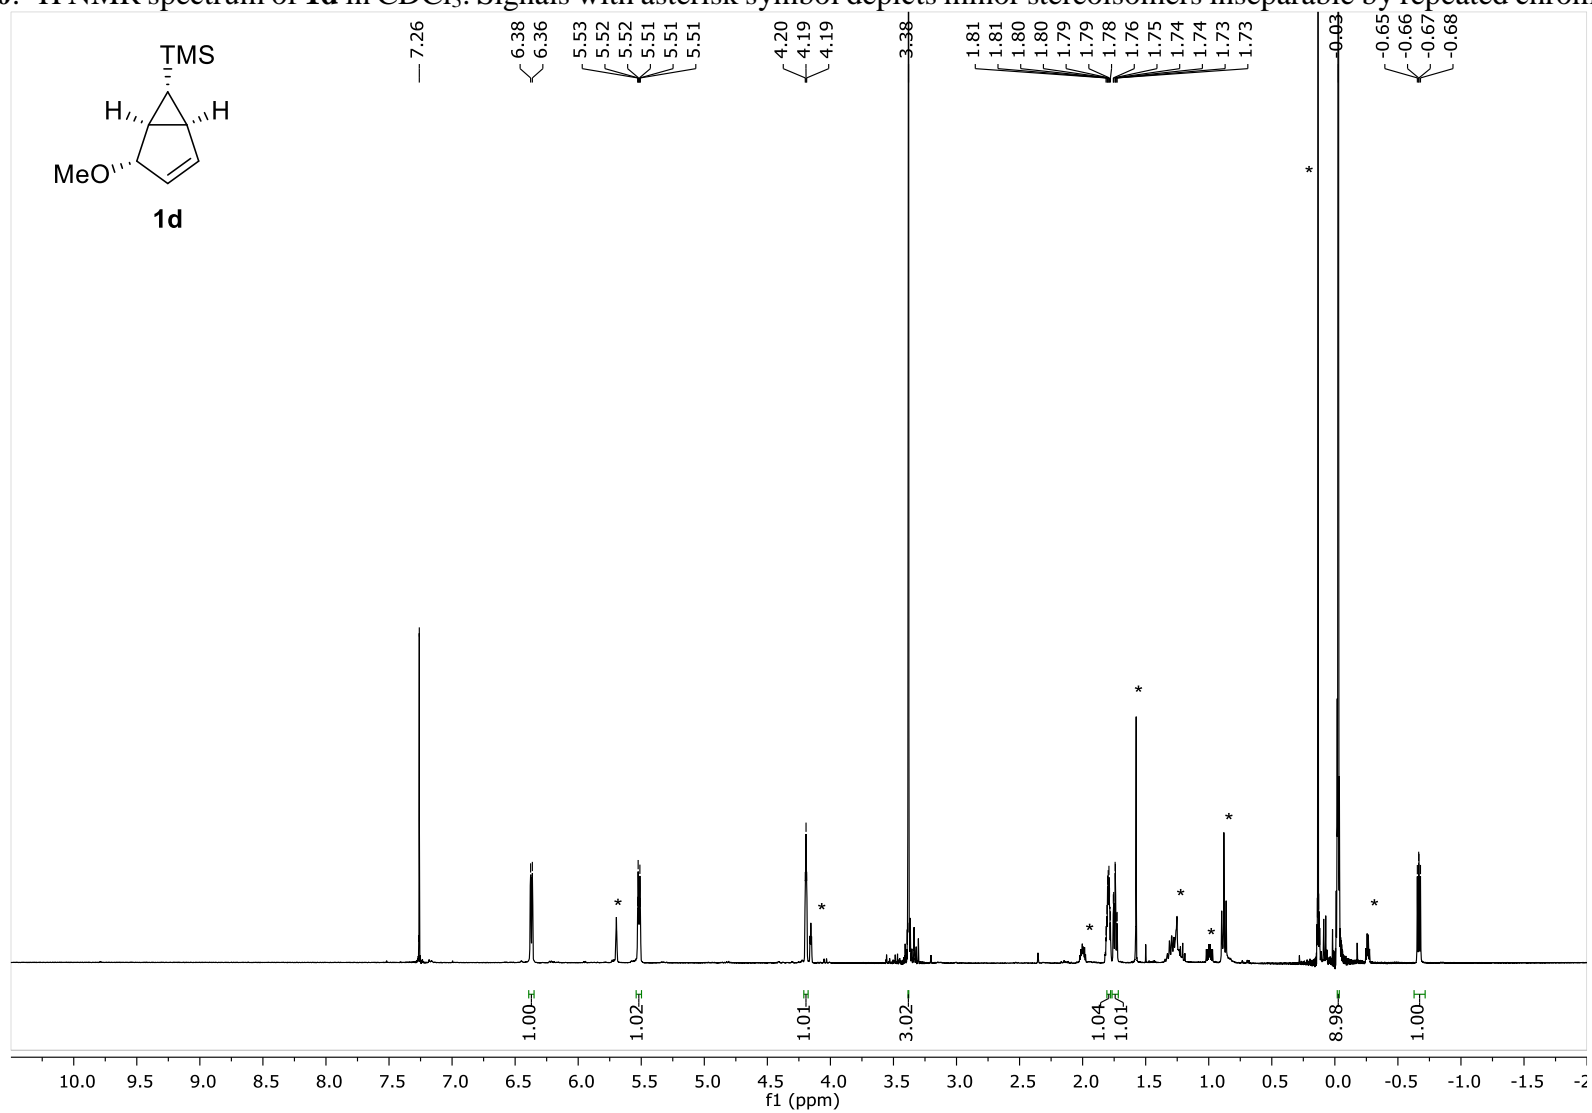



**Figure S51:**  $^{13}\text{C}$  NMR spectrum of **1d** in  $\text{CDCl}_3$ . Signals with asterisk symbol depicts minor stereoisomers inseparable by column chromatography.

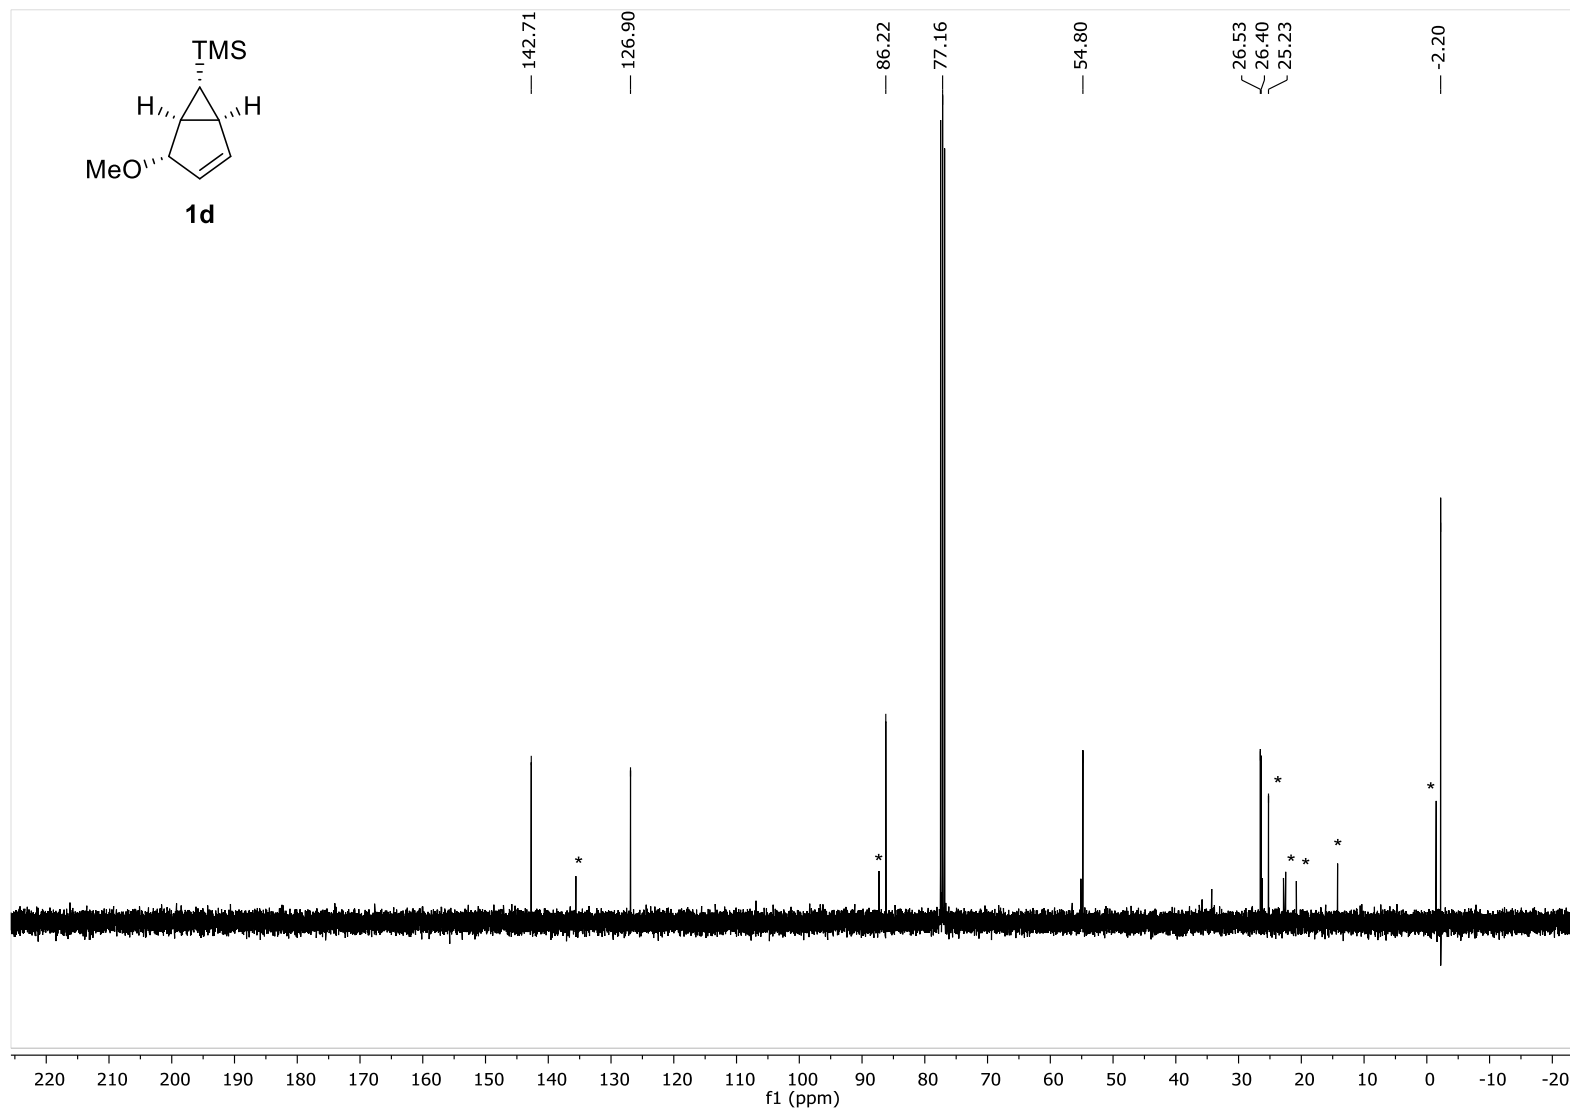

**Figure S52:** COSY spectrum of **1d** in CDCl<sub>3</sub>. Important correlations are highlighted.

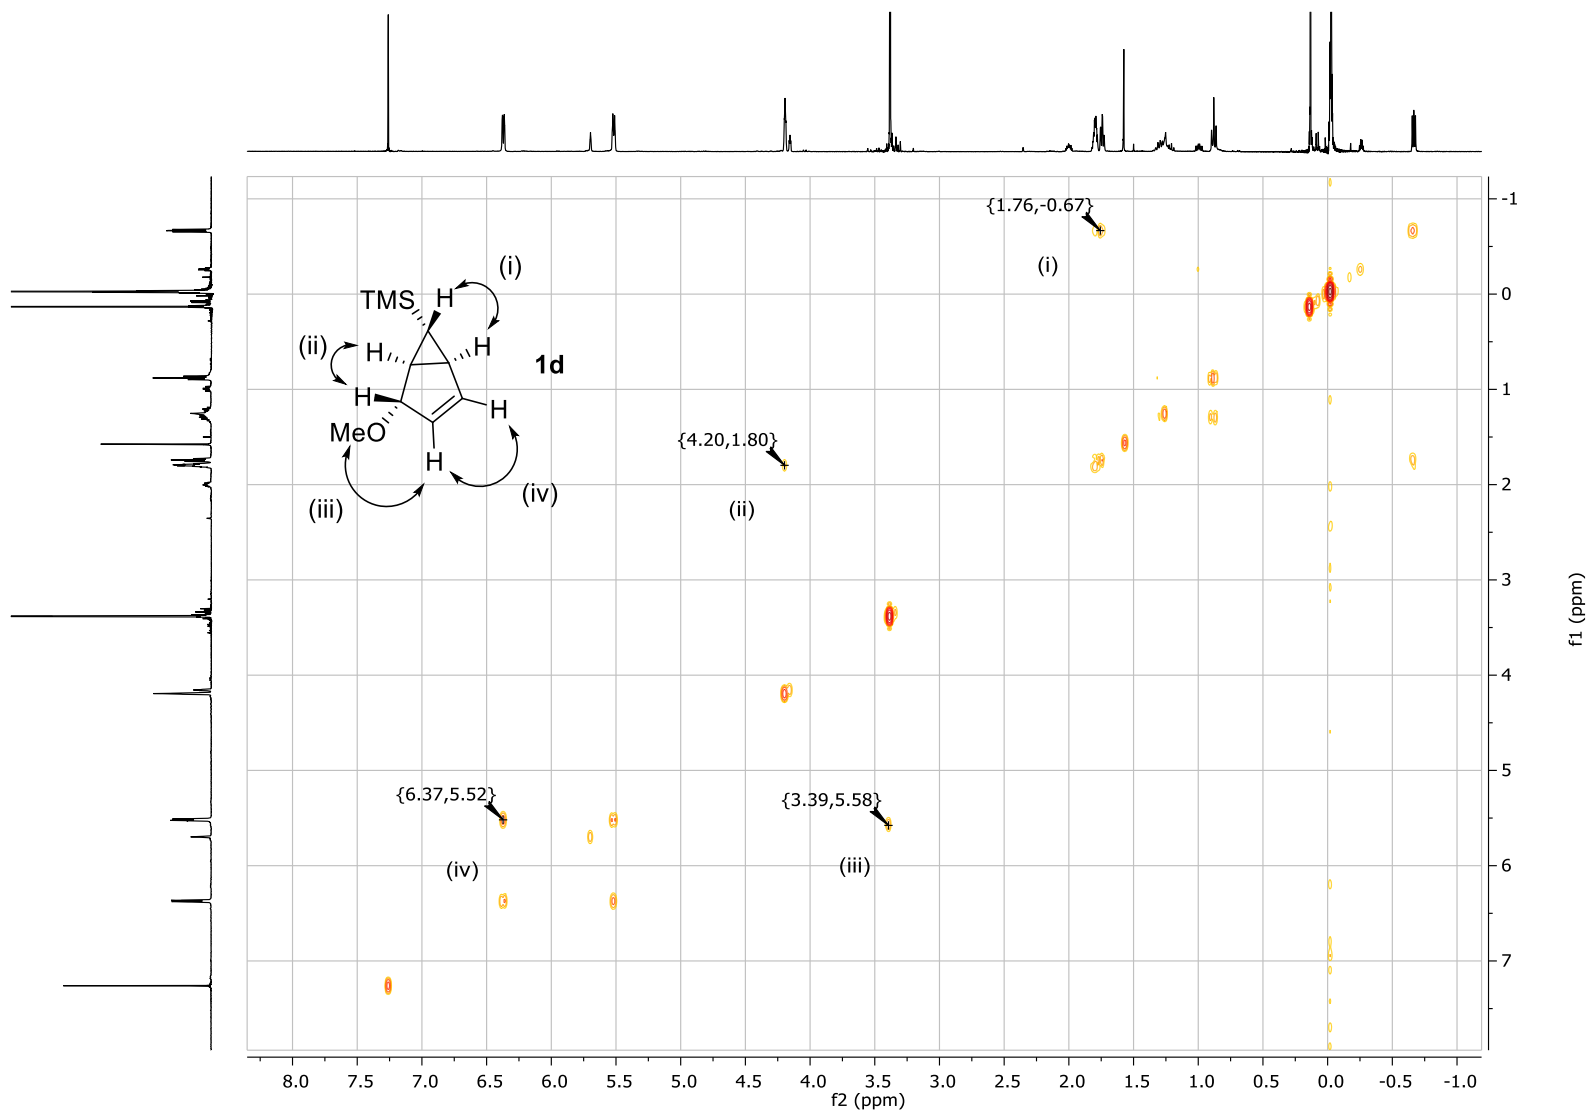

Figure S53: HSQC spectrum of **1d** in CDCl<sub>3</sub>.

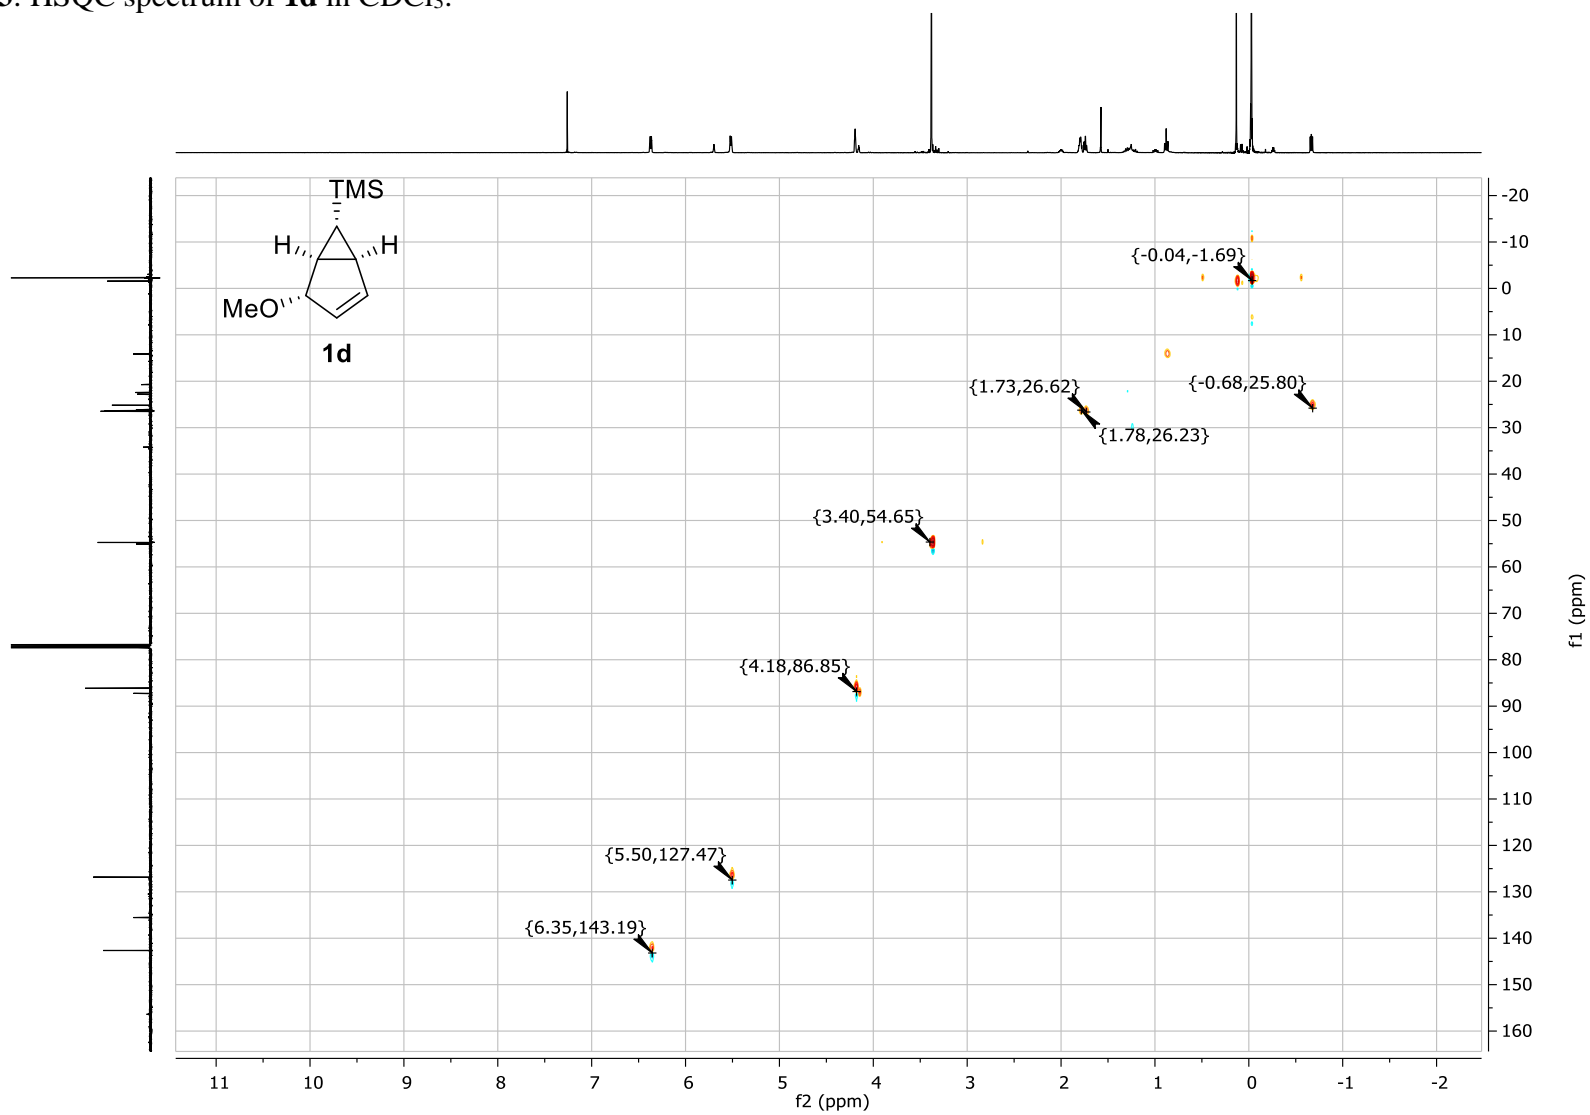

Figure S54: HMBC spectrum of **1d** in CDCl<sub>3</sub>. Important correlations are highlighted.

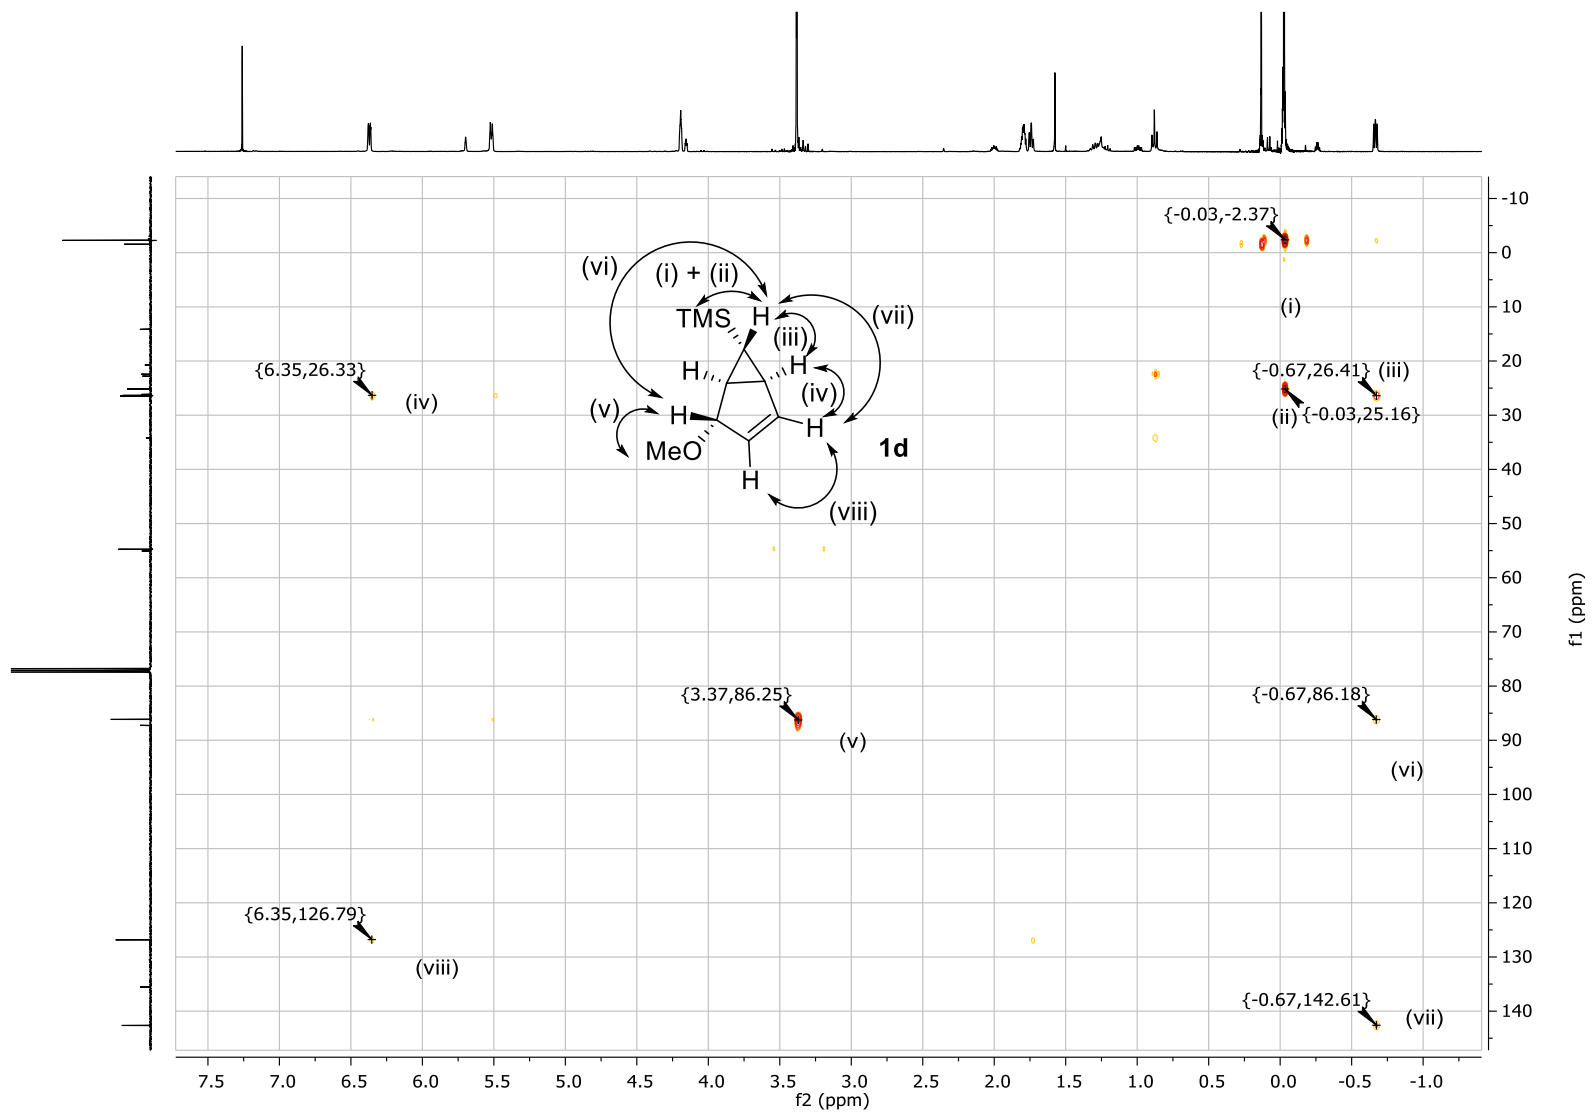

**Figure S55:**  $^1\text{H}$  NMR spectrum of mixture of **1d** (a), **1e** (b), unknown bicyclic product (c) and TMS benzene in  $\text{CDCl}_3$ .

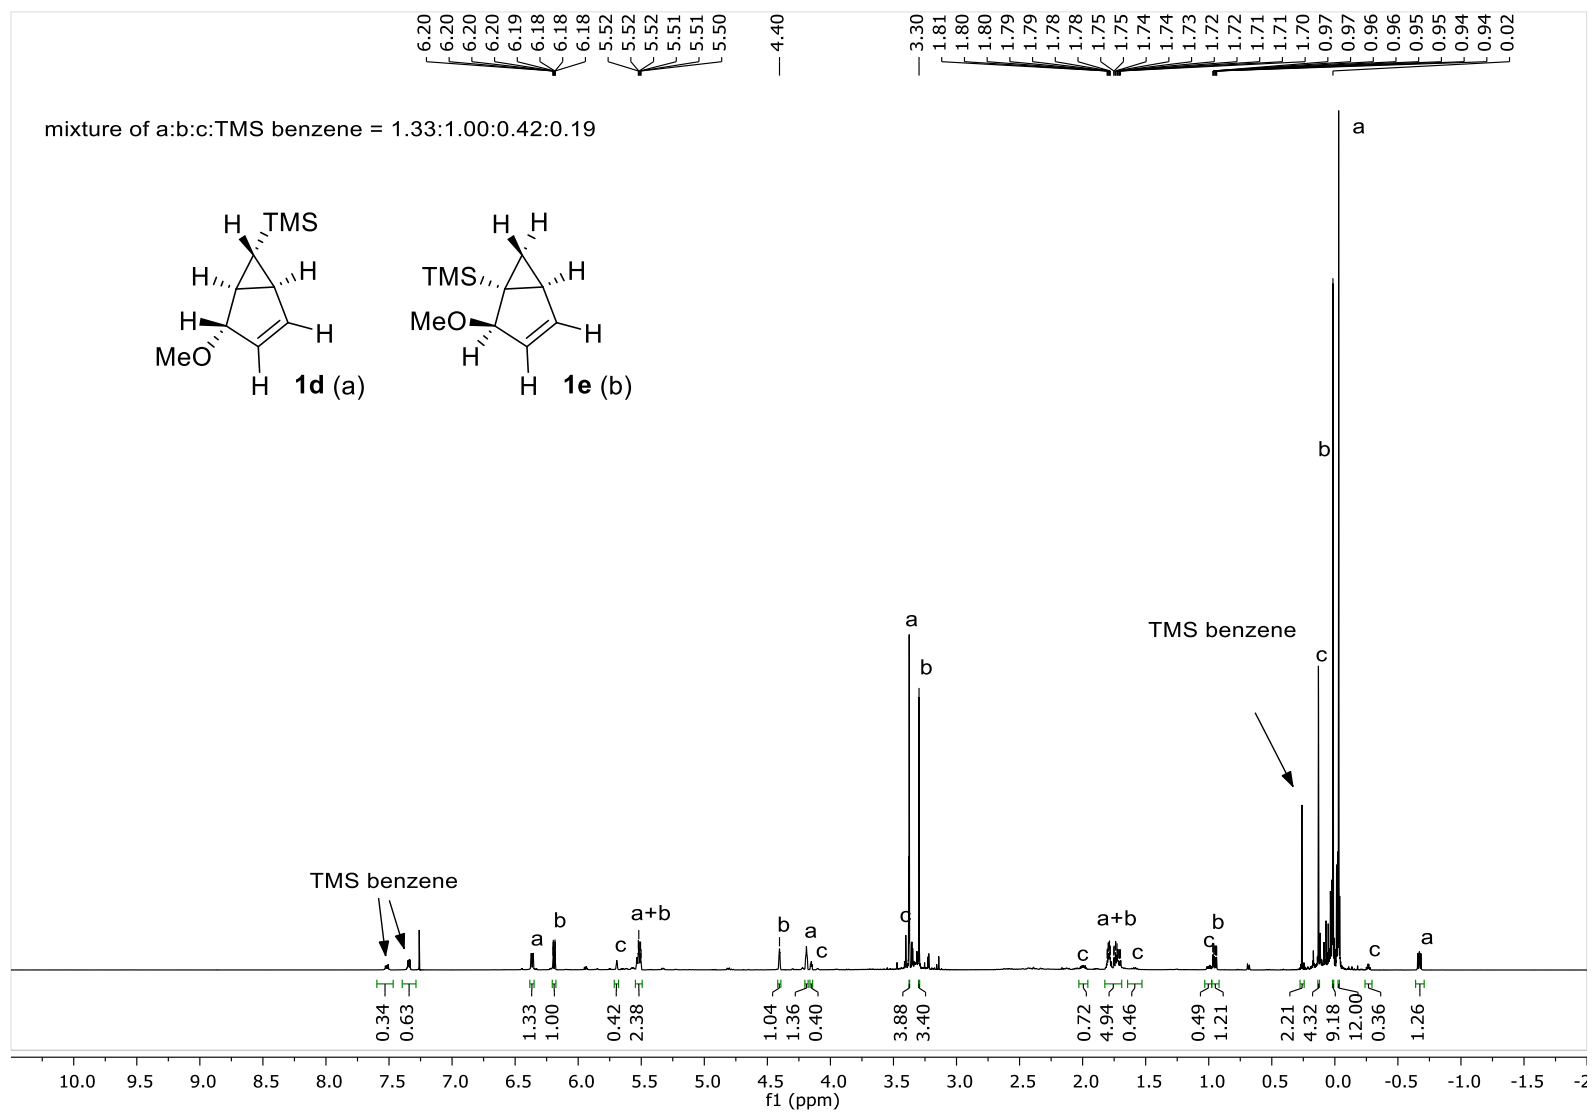

**Figure S56:** COSY spectrum of a mixture of **1d** (a), **1e** (b) and an unknown bicyclic product (c) in CDCl<sub>3</sub>. Important correlations of b are highlighted.

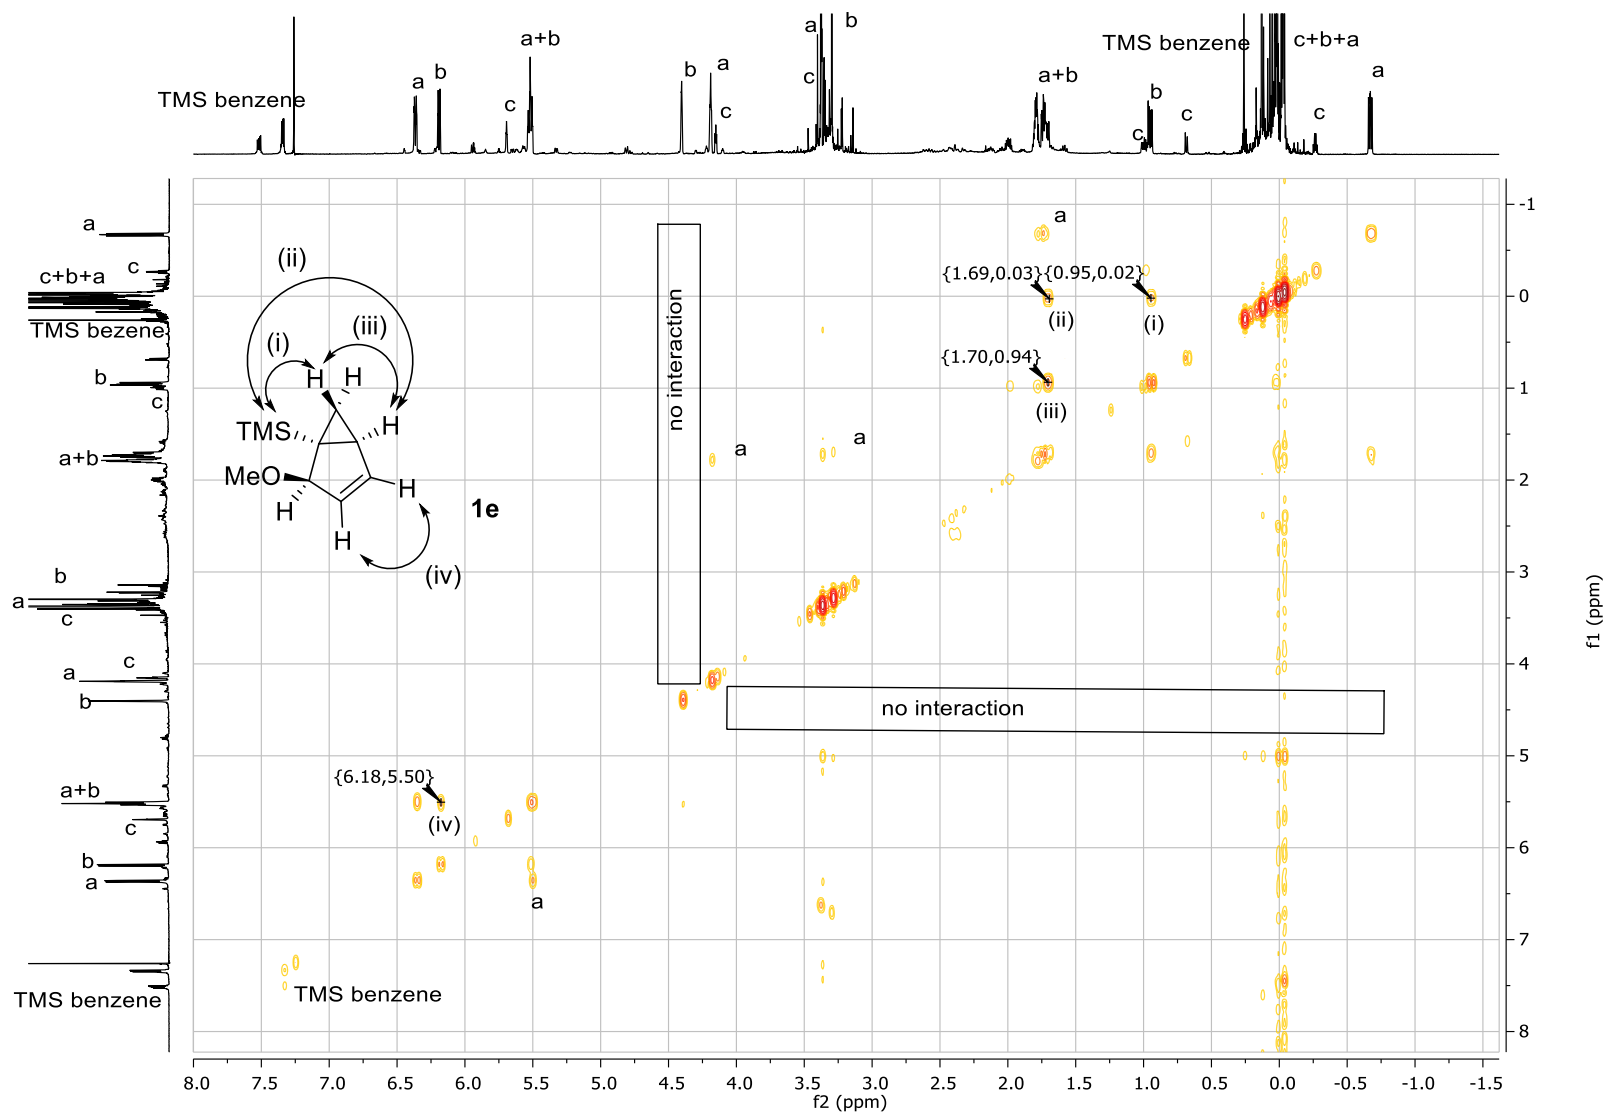

Figure S57: HSQC spectrum of **1e** in CDCl<sub>3</sub>.

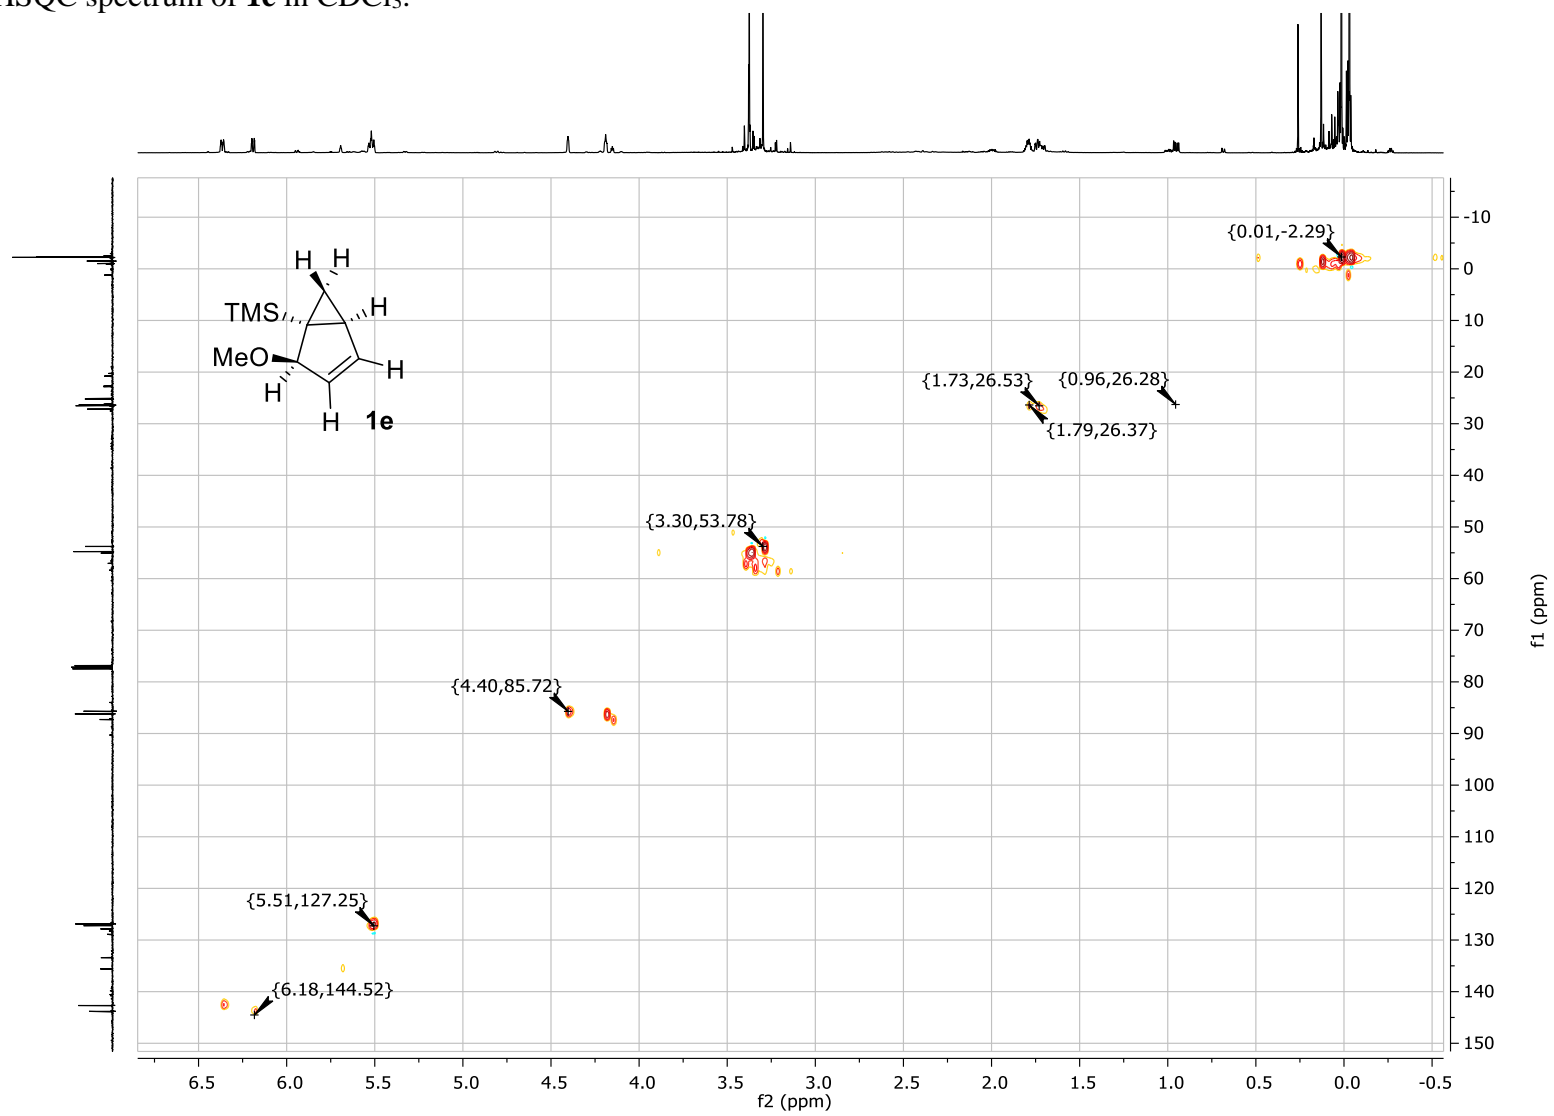

Figure S58: HMBC spectrum of **1e** in CDCl<sub>3</sub>.

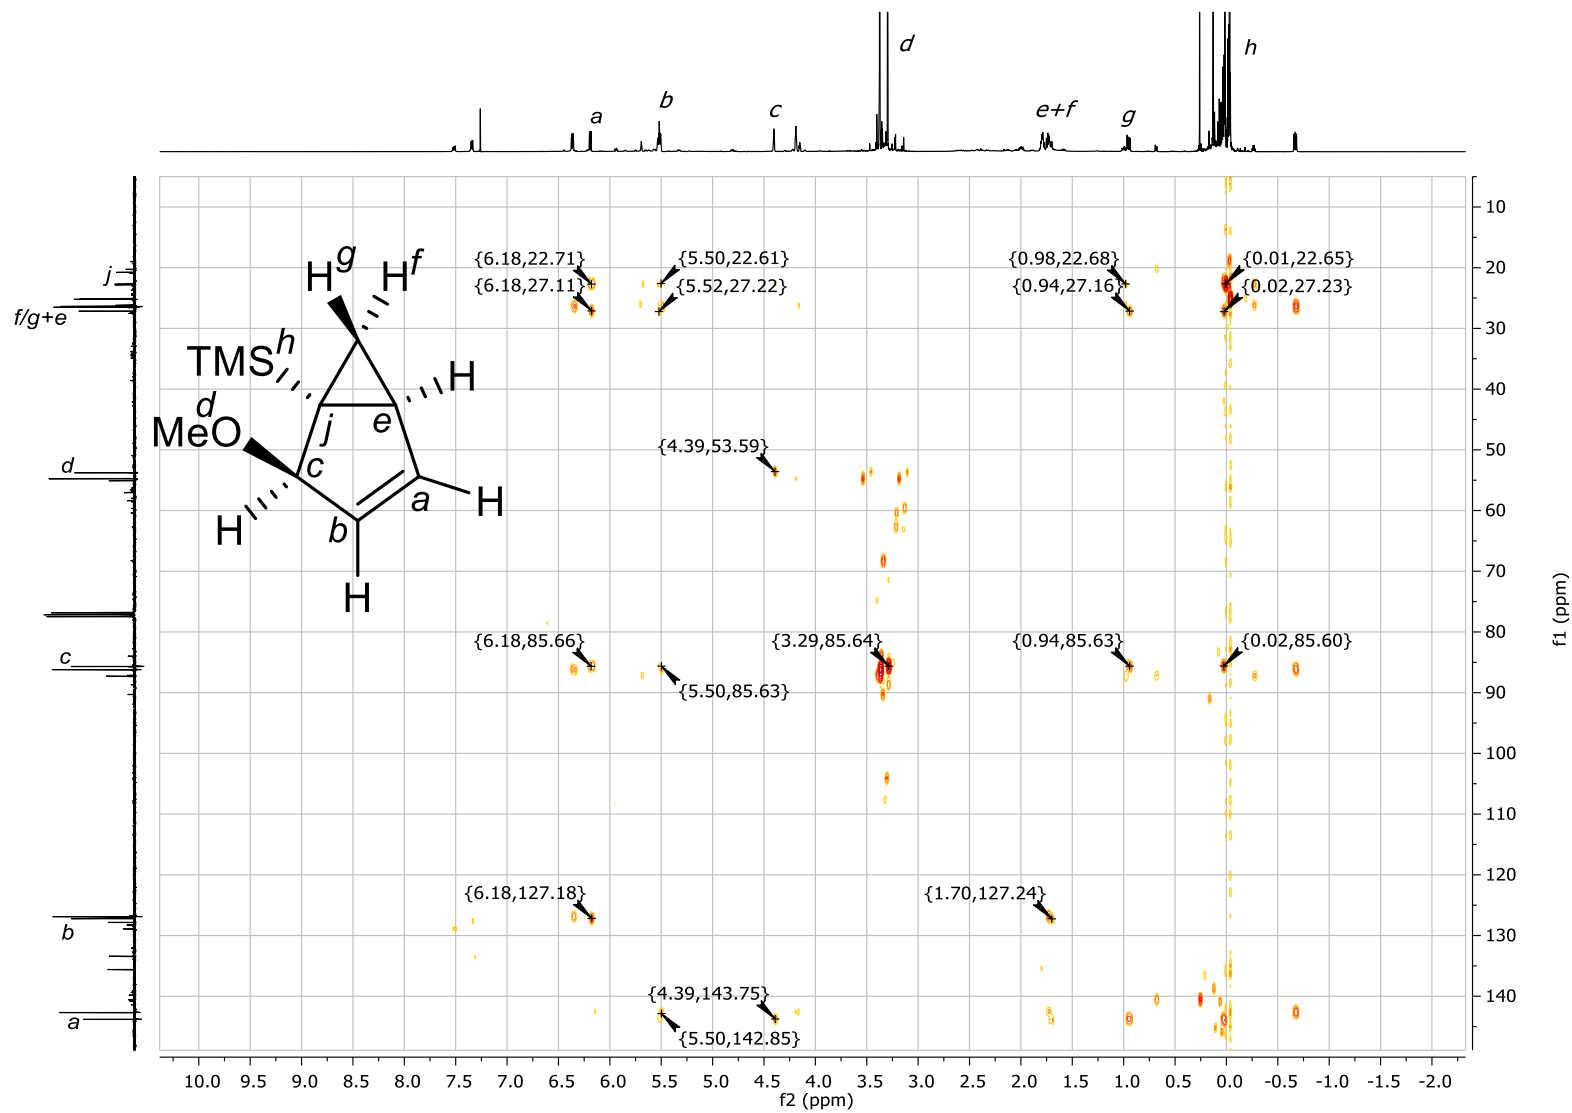



**Figure S59:** HRMS (GC coupled with TOF) of **1d**.

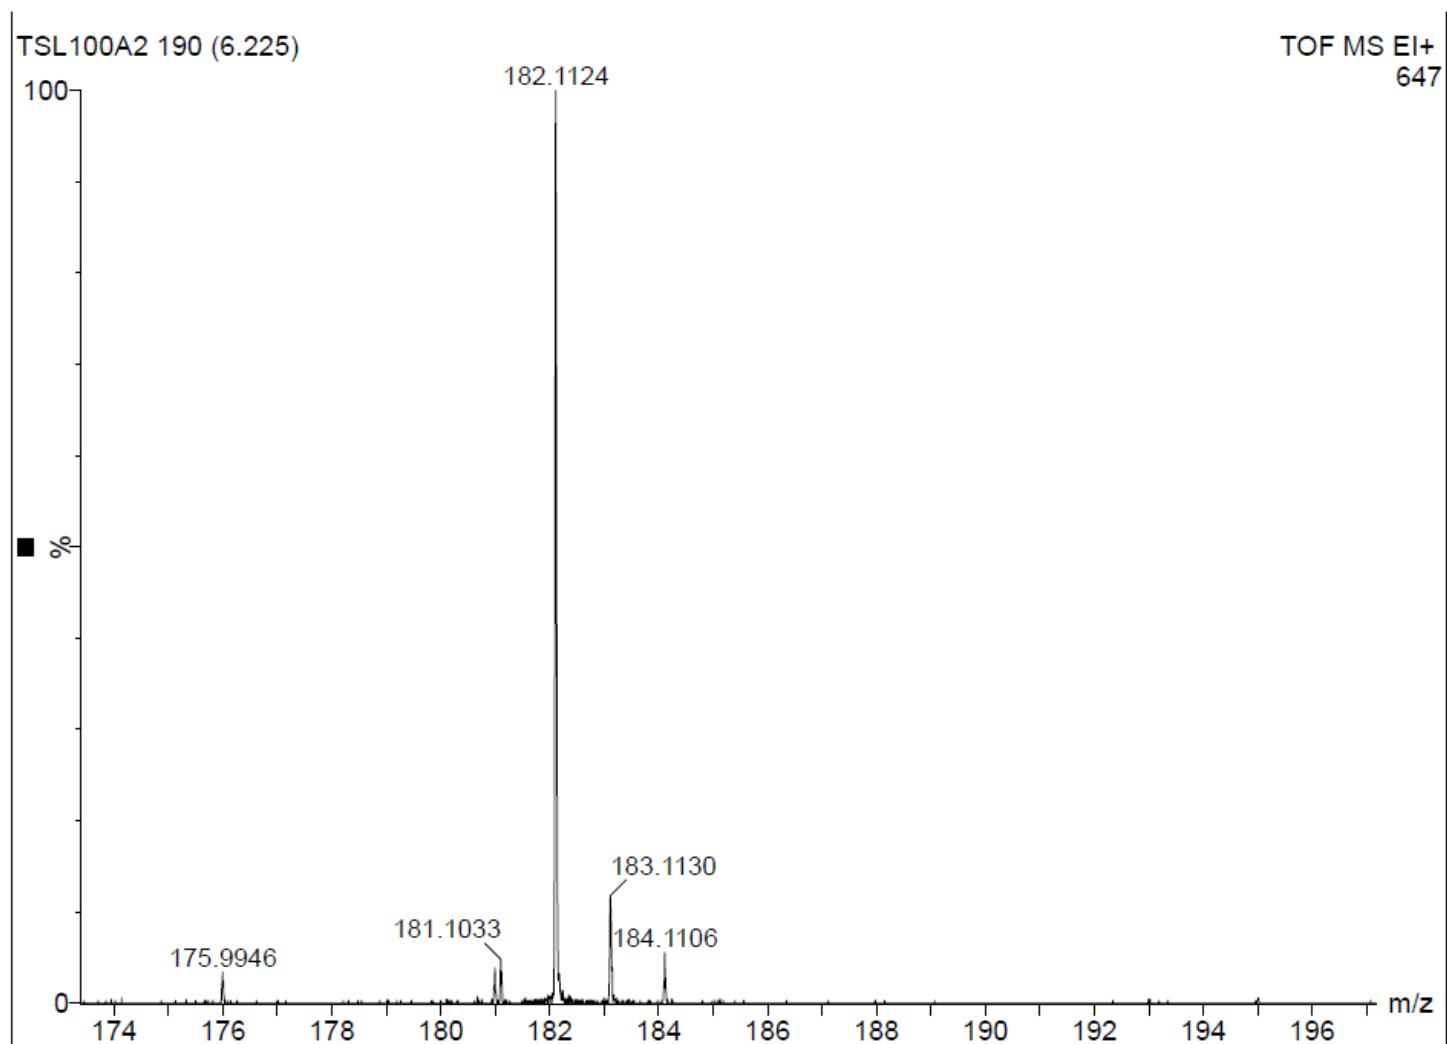

**Figure S60:** Predicted HRMS spectrum for C<sub>10</sub>H<sub>18</sub>OSi.

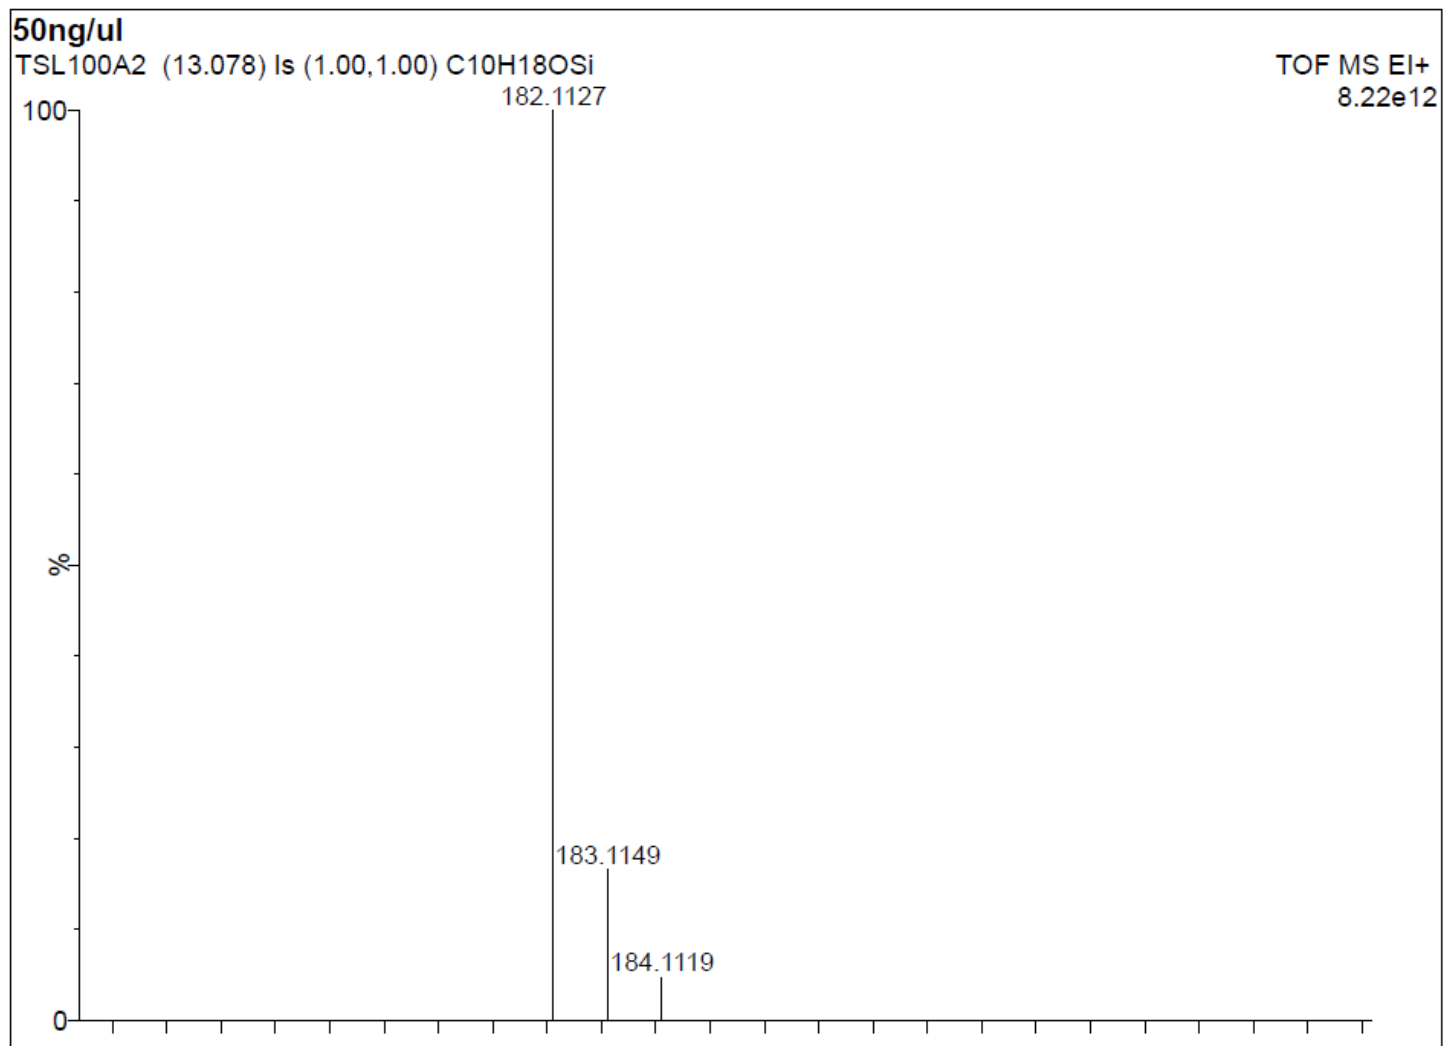

**Figure S61:**  $^1\text{H}$  NMR spectrum of **1c** in  $\text{CDCl}_3$ . Signals with asterisk symbol depict minor stereoisomers inseparable by repeated chromatography.

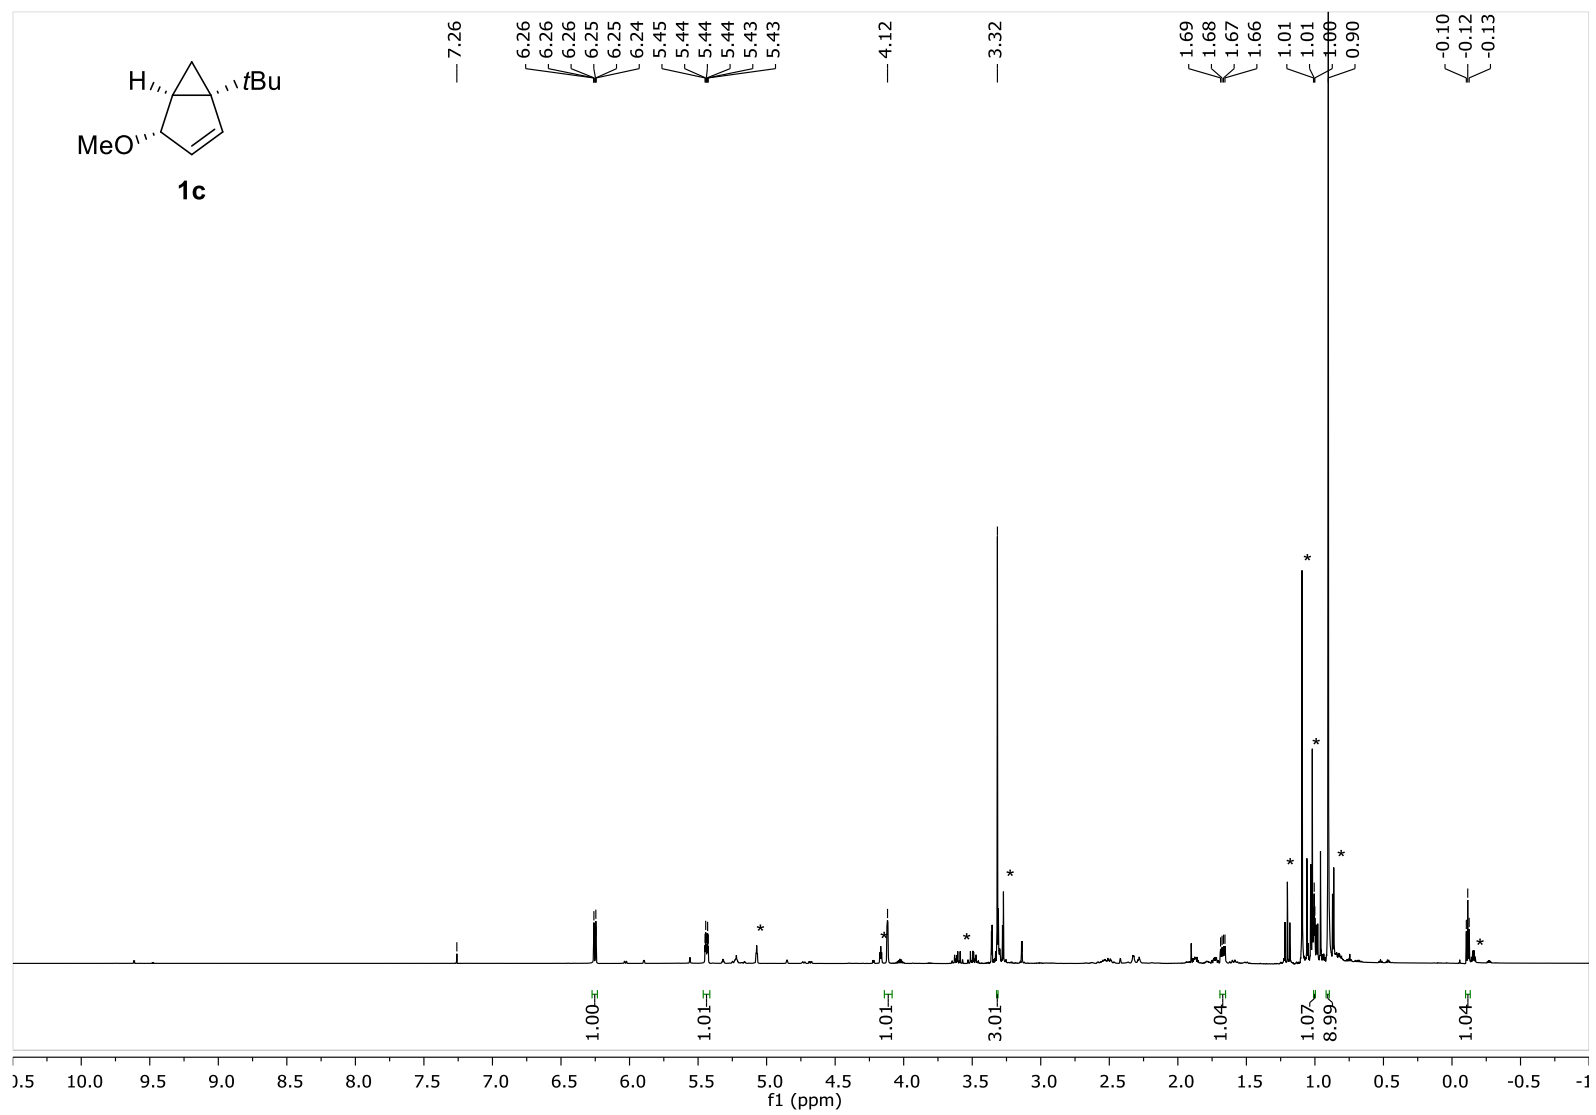

**Figure S62:** COSY spectrum of **1c** in CDCl<sub>3</sub>. Important correlations are highlighted.

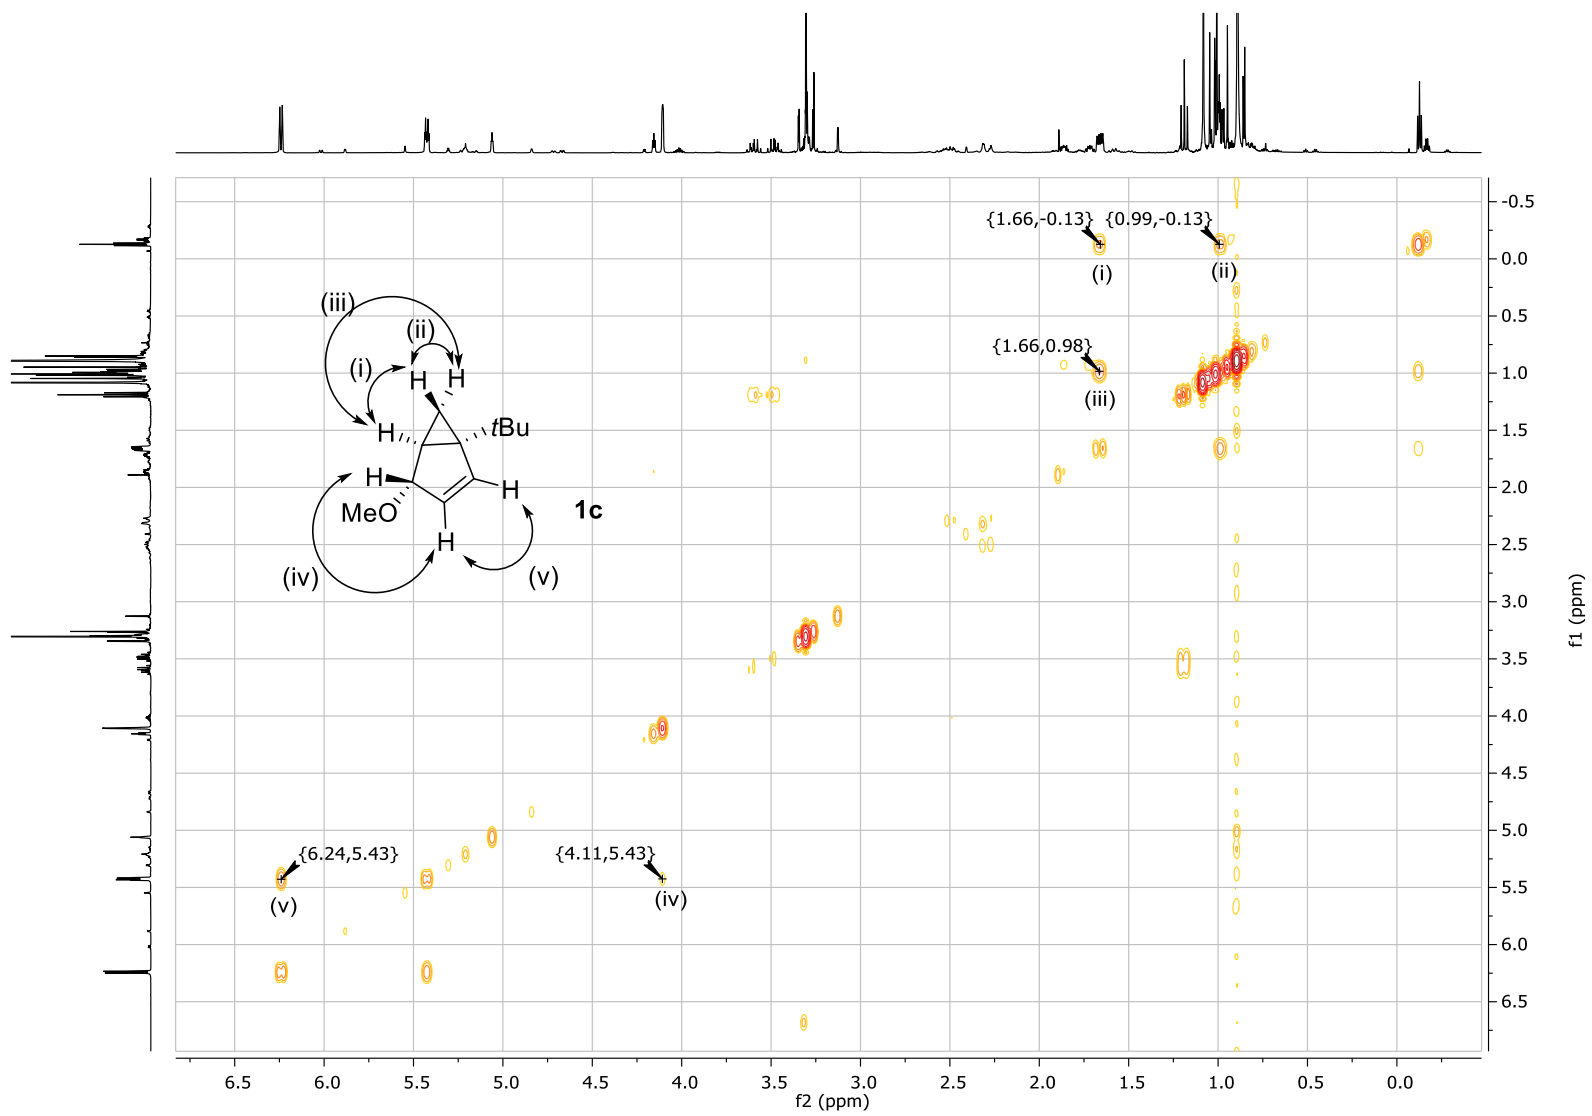

**Figure S63:**  $^1\text{H}$  NMR spectrum of **1a** in  $\text{CDCl}_3$ . Signals with asterisk symbol depict residual diethyl ether signals.

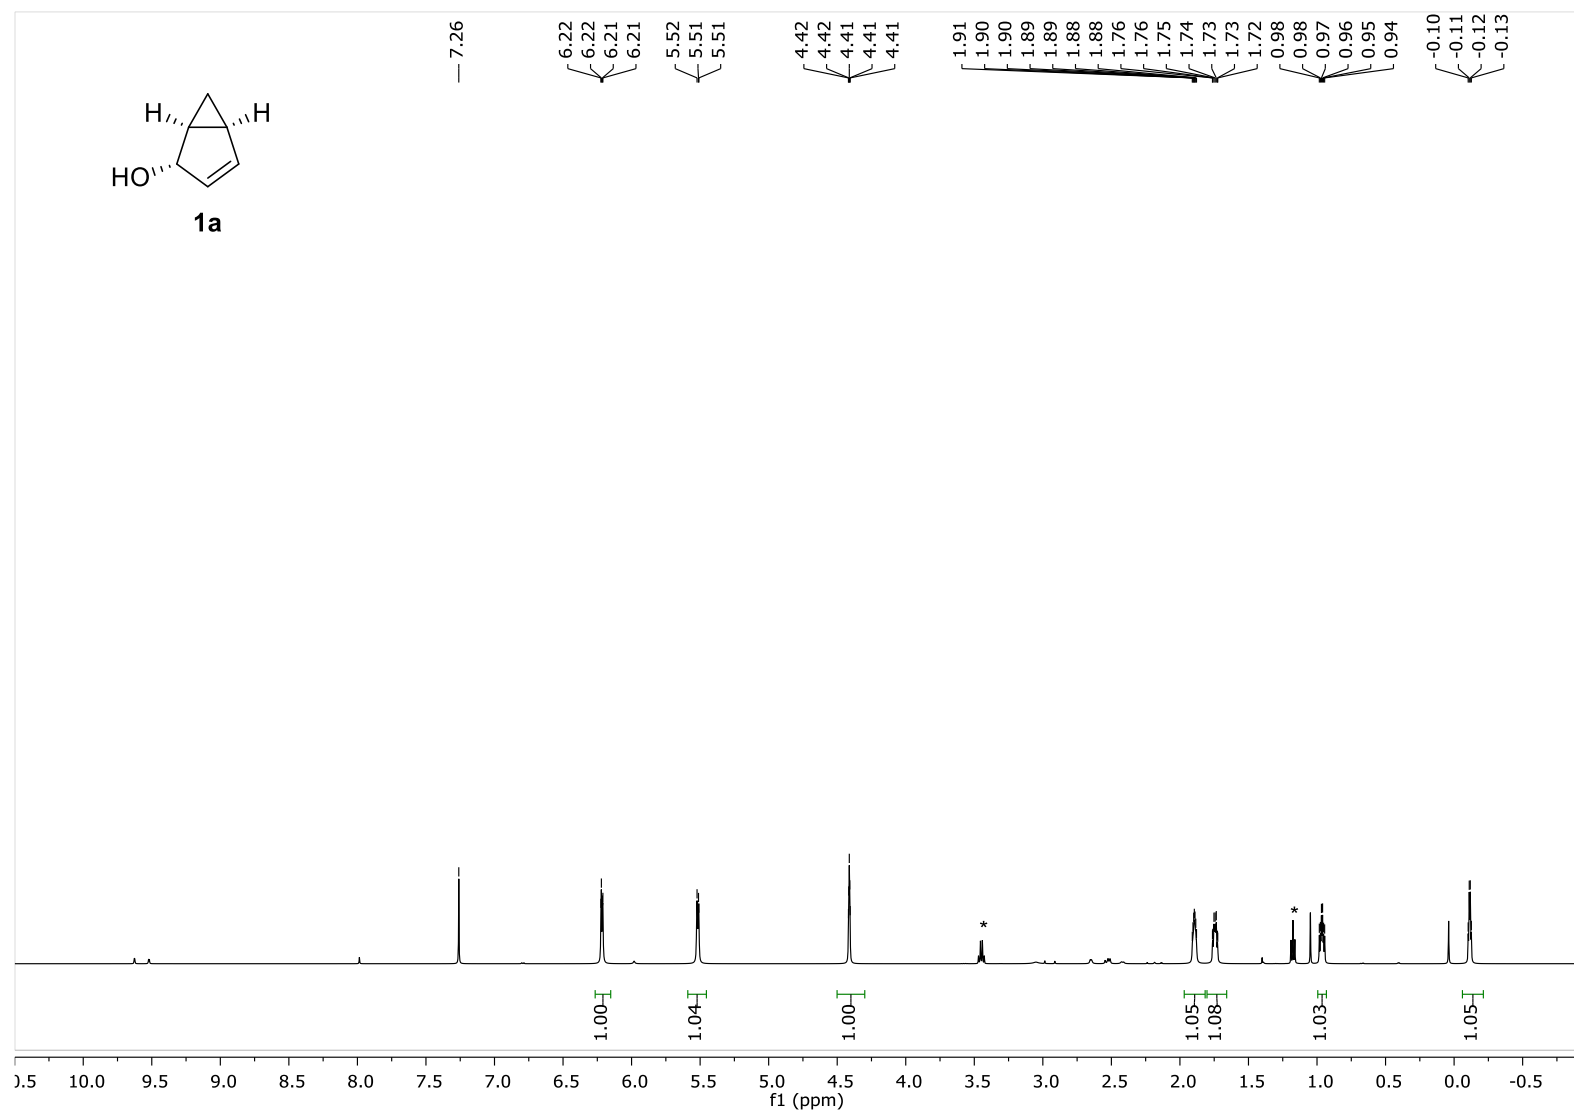

**Figure S64:** COSY spectrum of **1a** in CDCl<sub>3</sub>. Important correlations are highlighted.

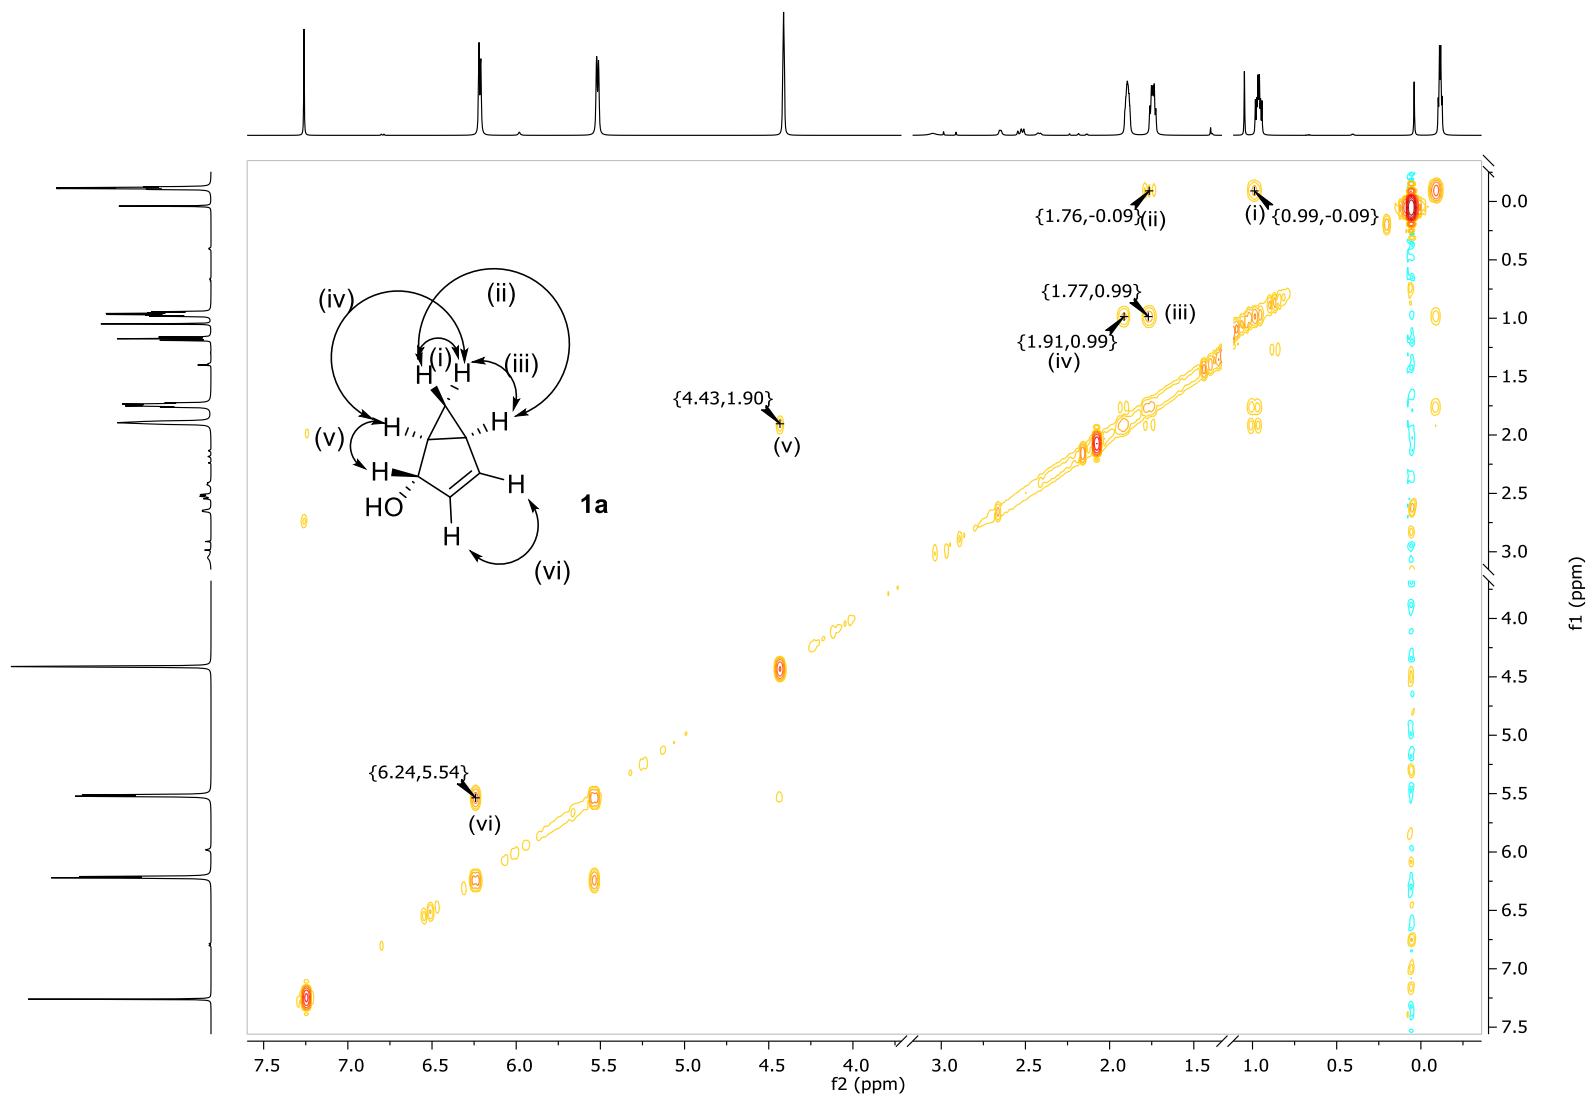

**Figure S65:**  $^1\text{H}$  NMR spectrum of **1b** (a) and an inseparable bicyclic isomer (b, ~20%) in  $\text{CDCl}_3$ . Signals with asterisk symbol depict residual diethyl ether signals.

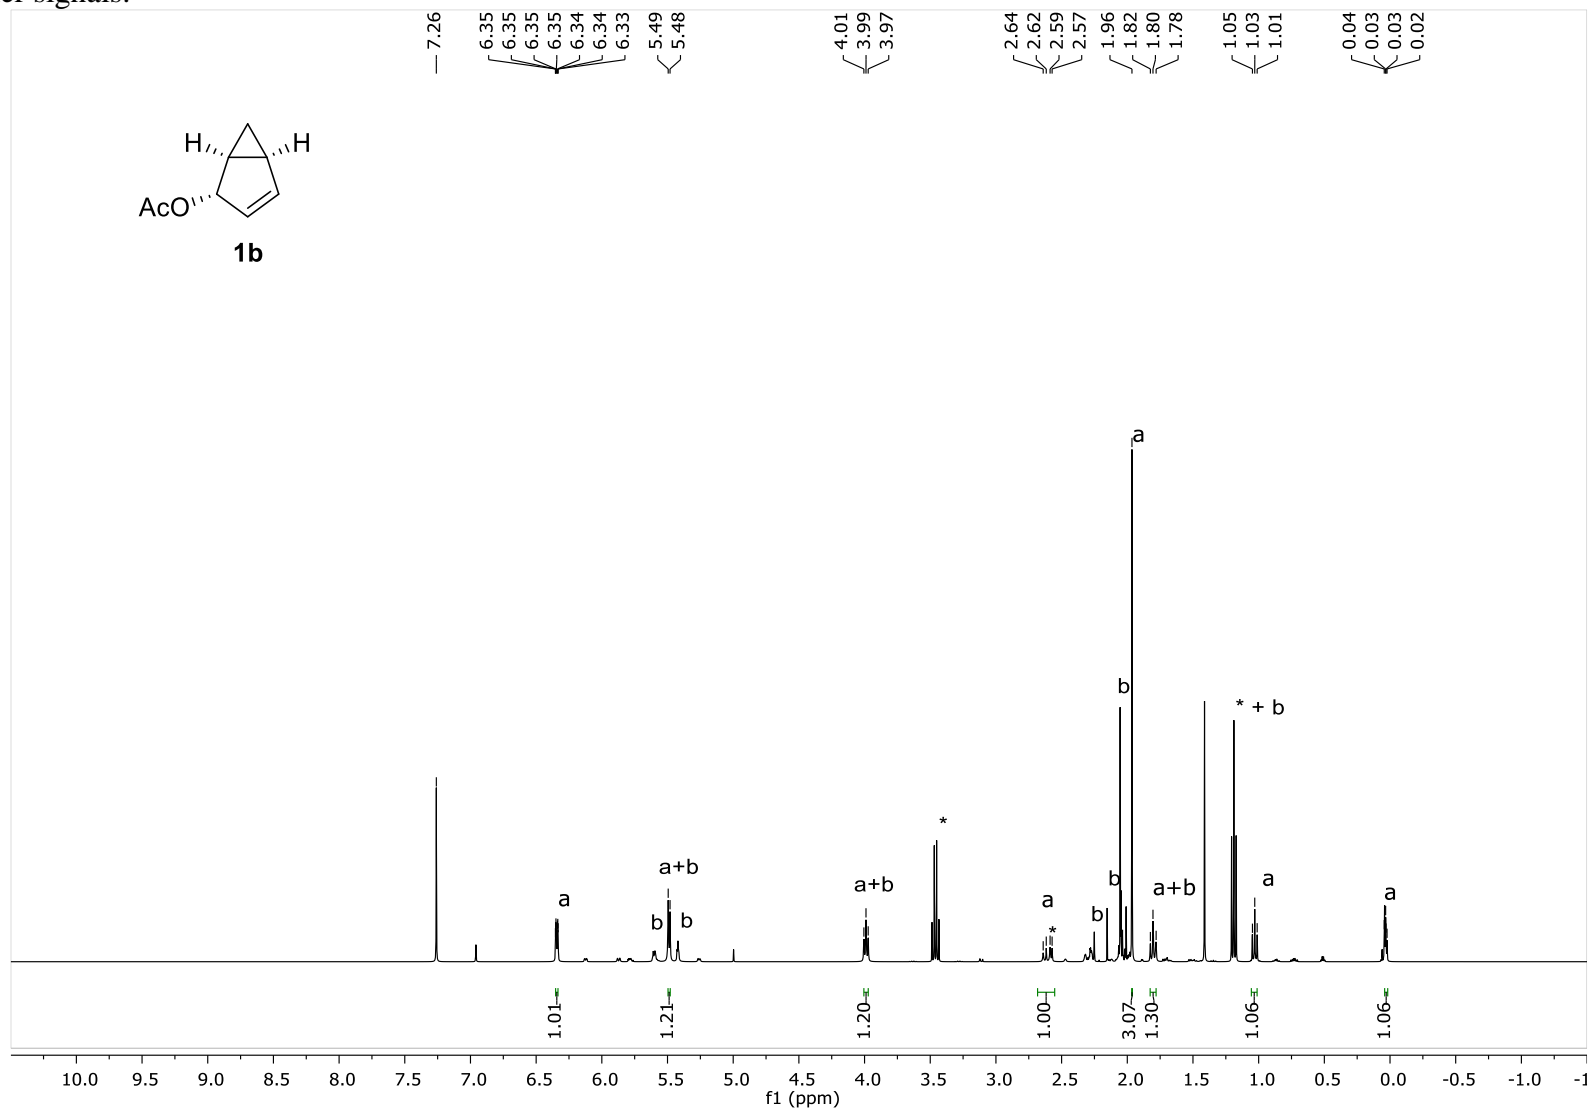

**Figure S66:** COSY spectrum of **1b** in CDCl<sub>3</sub>. Important correlations are highlighted, correlations of other isomers are shaded by grey rectangles.

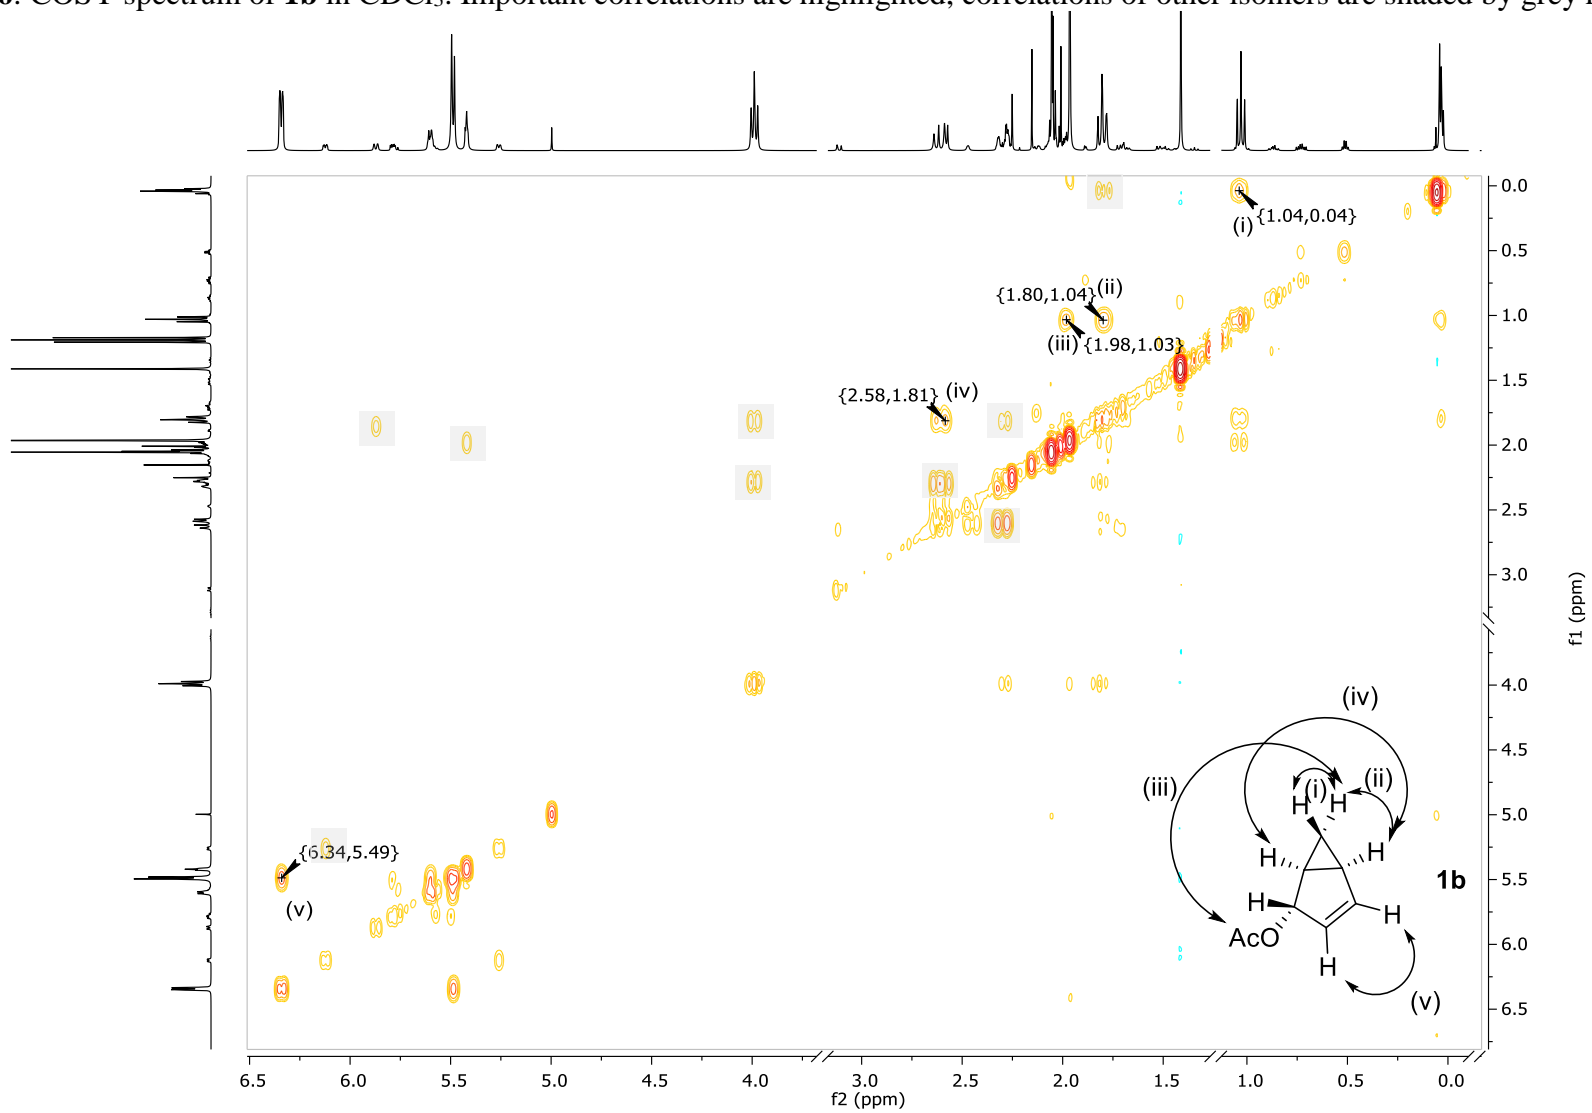



Figure S67: <sup>1</sup>H NMR spectrum of **7** in CDCl<sub>3</sub>. Mixtures of diastereoisomers.

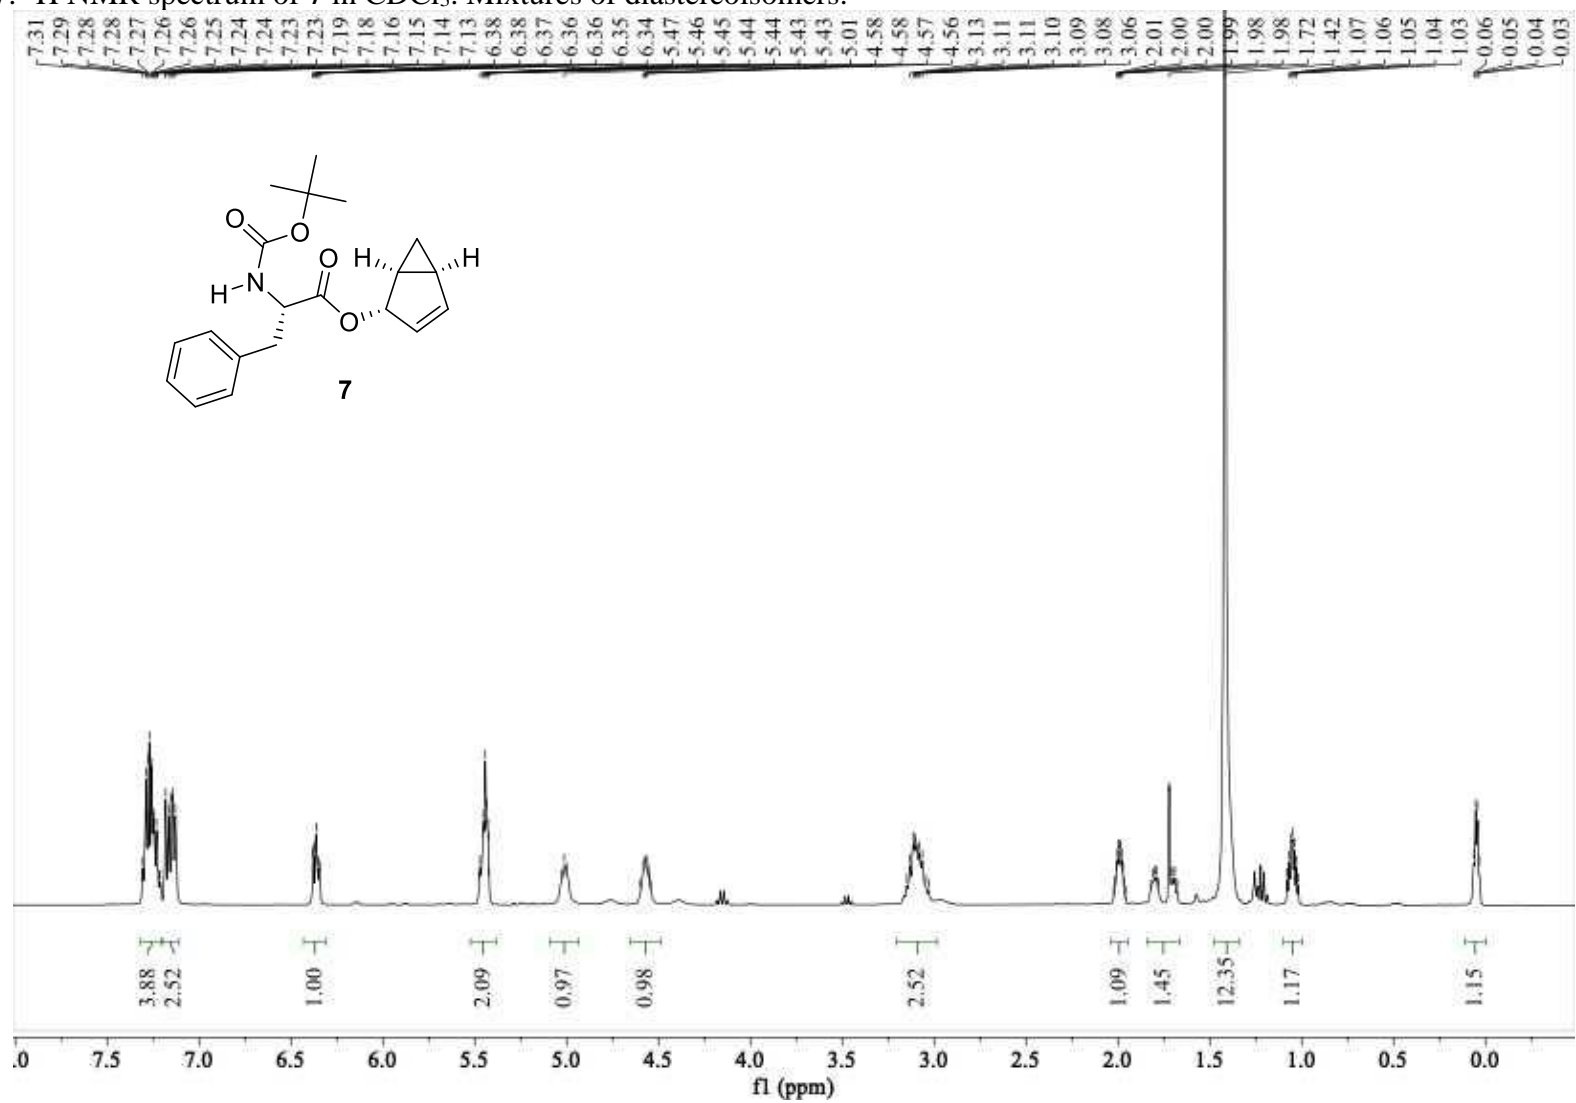

**Figure S68:**  $^{13}\text{C}$  NMR spectrum of **7** in  $\text{CDCl}_3$ . Mixtures of diastereoisomers.

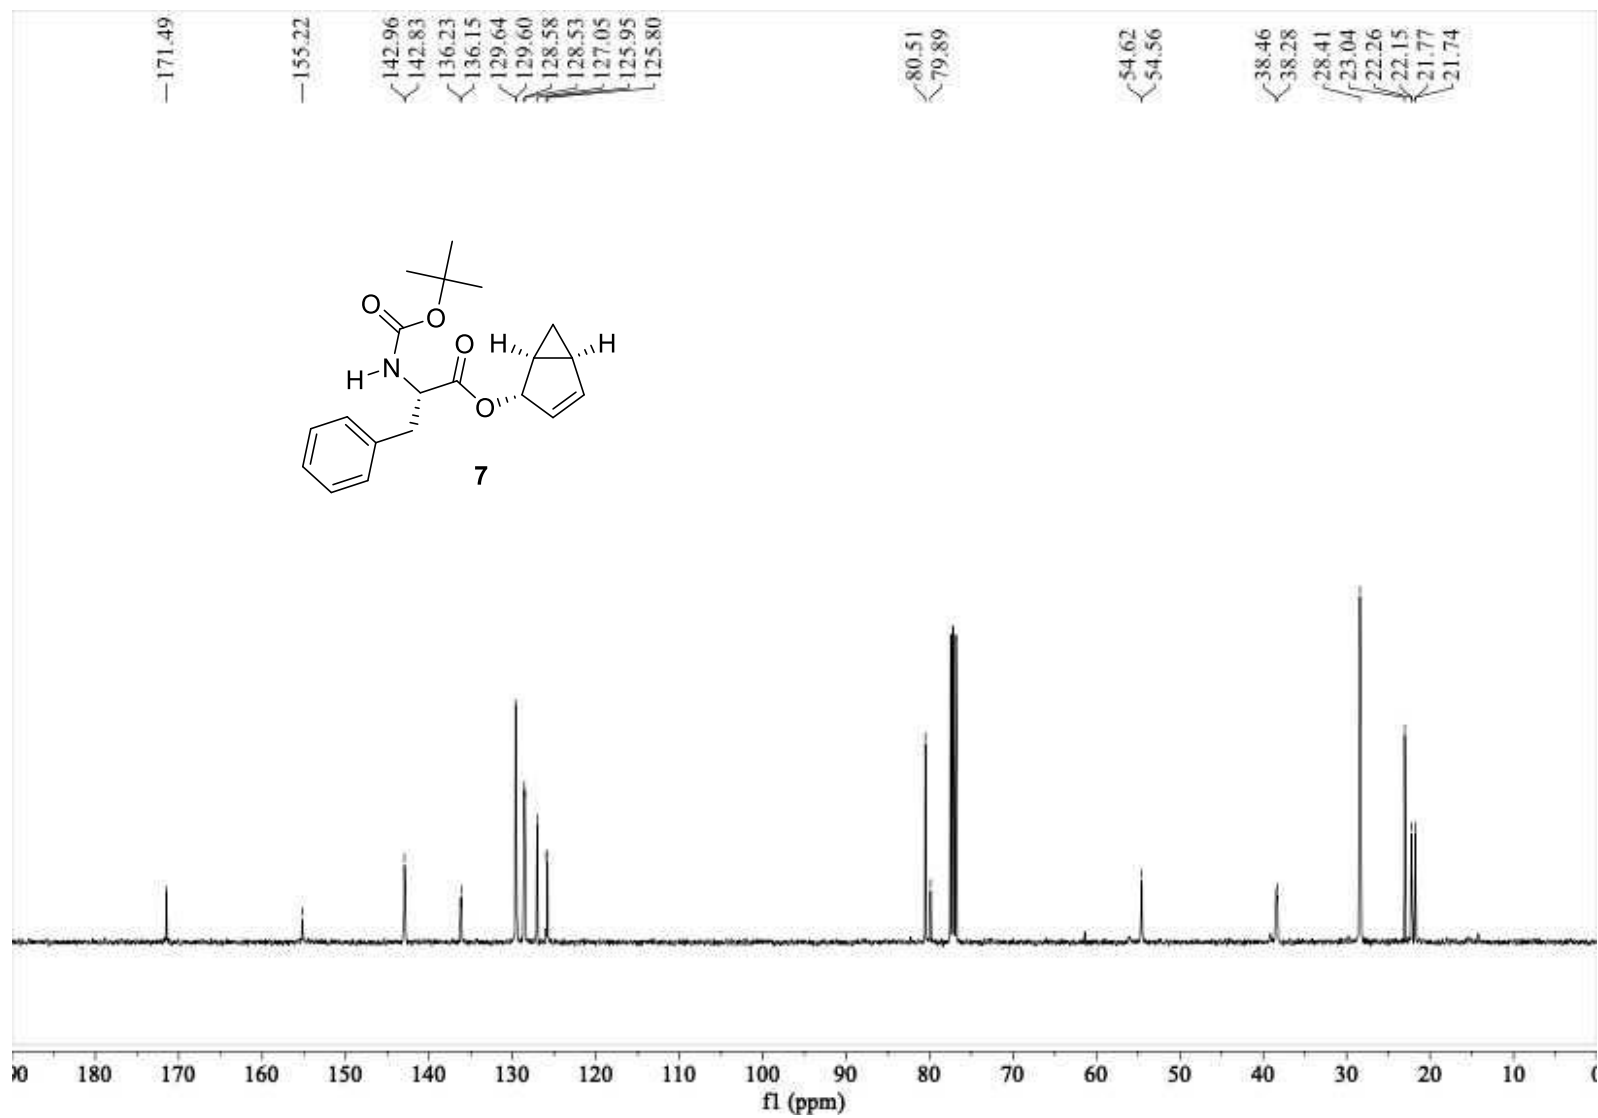

**Figure S69:**  $^1\text{H}$  NMR spectrum of **1f** in  $\text{CDCl}_3$ . Signals with asterisk symbol depict residual diethyl ether.

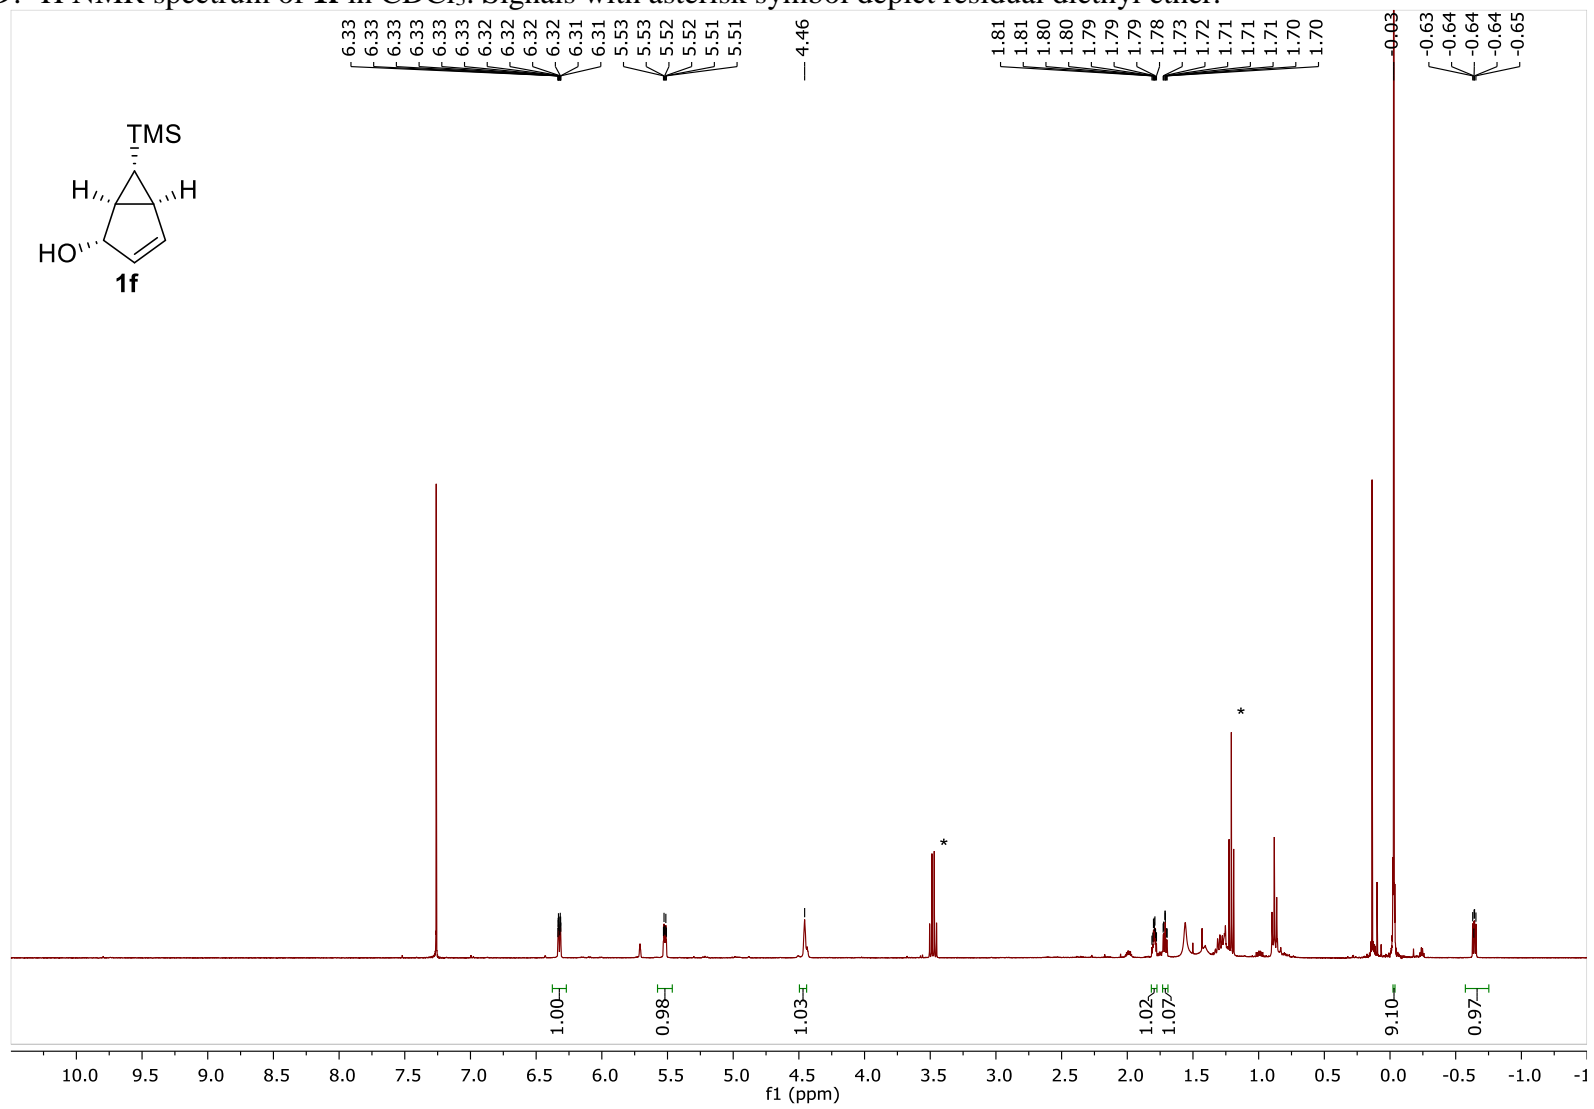

Figure S70: HRMS spectrum of 7.

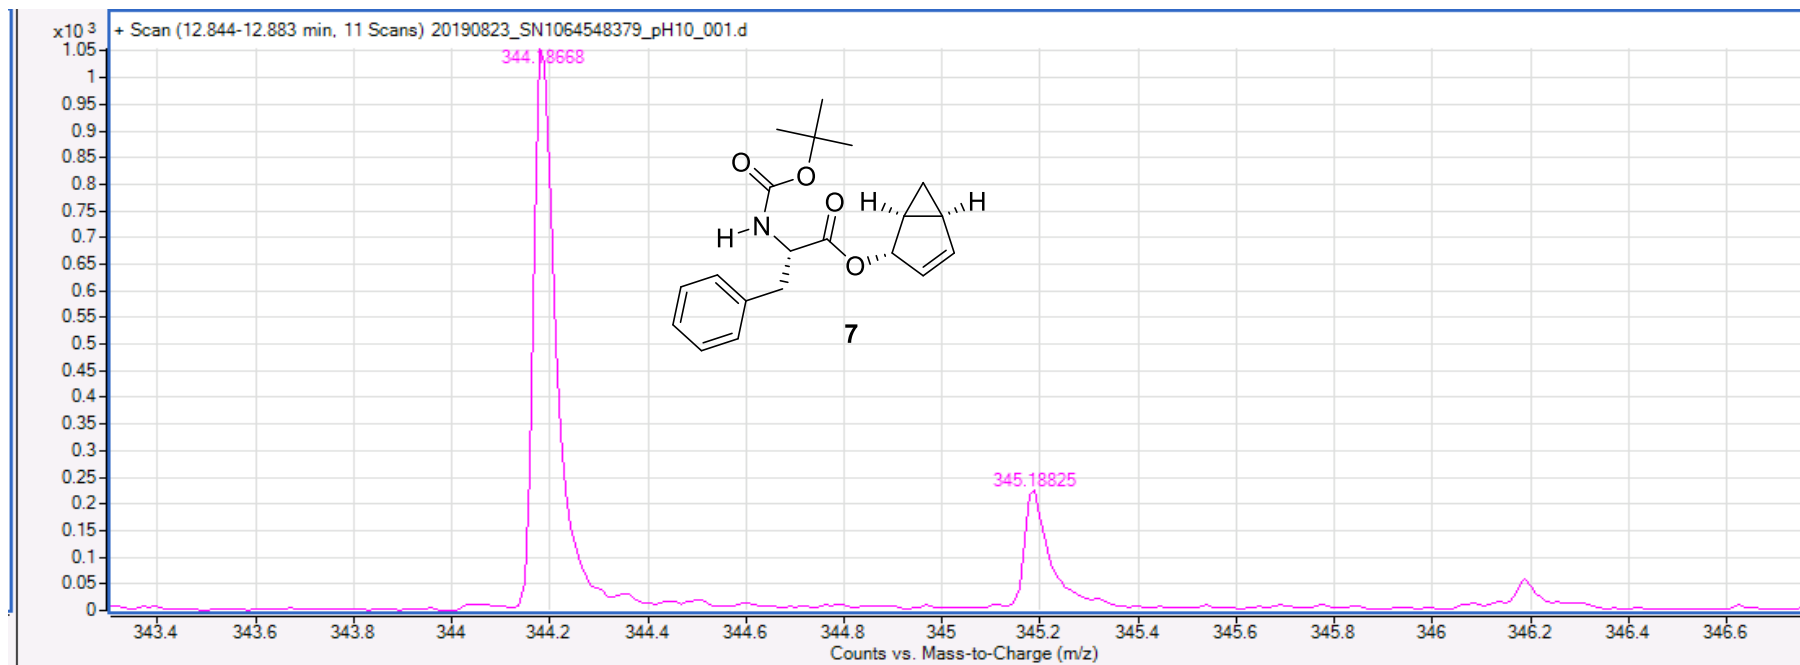

## 9. References

---

- <sup>1</sup> Hansch, C.; Leo, A.; Taft, R. W. A Survey of Hammett Substituent Constants and Resonance and Field Parameters. *Chem. Rev.* **1991**, *91* (2), 165–195.
- <sup>2</sup> Izawa, Y.; Tomioka, H.; Kagami, T.; Sato, T. Photochemical 1,3-Addition of Methanol to *t*-Butylbenzene. *J. Chem. Soc. Chem. Commun.* **1977**, 0 (21), 780–781.
- <sup>3</sup> Farenhorst, E.; Bickel, A. F. Photochemical Reactions of Benzene with Acids. *Tetrahedron Lett.* **1966**, 7 (47), 5911–5913.
- <sup>4</sup> Berson, J. A.; Hasty, N. M. Solvolytic Behavior of Bicyclo [3.1.0]Hex-3-En-2-Yl Derivatives. Mechanism of Photolysis of Benzene in Hydroxylic Media. *J. Am. Chem. Soc.* **1971**, *93* (6), 1549–1551.
- <sup>5</sup> Gaussian 16, Revision B.01, Frisch, M. J.; Trucks, G. W.; Schlegel, H. B.; Scuseria, G. E.; Robb, M. A.; Cheeseman, J. R.; Scalmani, G.; Barone, V.; Petersson, G. A.; Nakatsuji, H.; Li, X.; Caricato, M.; Marenich, A. V.; Bloino, J.; Janesko, B. G.; Gomperts, R.; Mennucci, B.; Hratchian, H. P.; Ortiz, J. V.; Izmaylov, A. F.; Sonnenberg, J. L.; Williams-Young, D.; Ding, F.; Lipparini, F.; Egidi, F.; Goings, J.; Peng, B.; Petrone, A.; Henderson, T.; Ranasinghe, D.; Zakrzewski, V. G.; Gao, J.; Rega, N.; Zheng, G.; Liang, W.; Hada, M.; Ehara, M.; Toyota, K.; Fukuda, R.; Hasegawa, J.; Ishida, M.; Nakajima, T.; Honda, Y.; Kitao, O.; Nakai, H.; Vreven, T.; Throssell, K.; Montgomery, J. A., Jr.; Peralta, J. E.; Ogliaro, F.; Bearpark, M. J.; Heyd, J. J.; Brothers, E. N.; Kudin, K. N.; Staroverov, V. N.; Keith, T. A.; Kobayashi, R.; Normand, J.; Raghavachari, K.; Rendell, A. P.; Burant, J. C.; Iyengar, S. S.; Tomasi, J.; Cossi, M.; Millam, J. M.; Klene, M.; Adamo, C.; Cammi, R.; Ochterski, J. W.; Martin, R. L.; Morokuma, K.; Farkas, O.; Foresman, J. B.; Fox, D. J. Gaussian, Inc., Wallingford CT, 2016.
- <sup>6</sup> Kaplan, L.; Rausch, D. J.; Wilzbach, K. E. Photosolvation of Benzene. Mechanism of Formation of Bicyclo[3.1.0]Hex-3-En-2-Yl and of Bicyclo[3.1.0]Hex-2-En-6-Yl Derivatives. *J. Am. Chem. Soc.* **1972**, *94* (24), 8638–8640.
- <sup>7</sup> Montalti, M.; Credi, A.; Prodi, L.; Gandolfi, M. T. *Handbook of Photochemistry, Third Edition*, 3 edition.; CRC Press: Boca Raton, 2006.

- 
- <sup>8</sup> Wilzbach, K. E.; Ritscher, J. S.; Kaplan, Louis. Benzvalene, the Tricyclic Valence Isomer of Benzene. *J. Am. Chem. Soc.* **1967**, *89* (4), 1031–1032
- <sup>9</sup> Kaplan, L.; Pavlik, J. W.; Wilzbach, K. E. Photohydration of Pyridinium Ions. *J. Am. Chem. Soc.* **1972**, *94* (9), 3283–3284.
- <sup>10</sup> Yoon, U. C.; Quillen, S. L.; Mariano, P. S.; Swanson, R.; Stavinoha, J. L.; Bay, E. Exploratory and Mechanistic Aspects of the Electron-Transfer Photochemistry of Olefin-N-Heteroaromatic Cation Systems. *J. Am. Chem. Soc.* **1983**, *105* (5), 1204–1218.
- <sup>11</sup> Ling, R.; Yoshida, M.; Mariano, P. S. Exploratory Investigations Probing a Preparatively Versatile, Pyridinium Salt Photoelectrocyclization–Solvolytic Aziridine Ring Opening Sequence. *J. Org. Chem.* **1996**, *61* (13), 4439–4449.
- <sup>12</sup> Acar, E. A.; Glarner, F.; Burger, U. Aminocyclopentitols from N-Alkylpyridinium Salts: A Photochemical Approach. *Helvetica Chimica Acta* **1998**, *81* (5–8), 1095–1104.
- <sup>13</sup> Li, J.; Lang, F.; Ganem, B. Enantioselective Approaches to Aminocyclopentitols: A Total Synthesis of (+)-6-Epitrehazolin and a Formal Total Synthesis of (+)-Trehazolin. *J. Org. Chem.* **1998**, *63* (10), 3403–3410.
- <sup>14</sup> Lu, H.; Mariano, P. S.; Lam, Y. A Concise Synthesis of the (–)-Allosamizoline Aminocyclopentitol Based on Pyridinium Salt Photochemistry. *Tetrahedron Letters* **2001**, *42* (29), 4755–4757.
- <sup>15</sup> Feng, X.; Duesler, E. N.; Mariano, P. S. Pyridinium Salt Photochemistry in a Concise Route for Synthesis of the Trehazolin Aminocyclitol, Trehazolamine. *J. Org. Chem.* **2005**, *70* (14), 5618–5623.
- <sup>16</sup> Penkett, C. S. New Methods of Preparing Cyclopentenone Ketals: The Photosolvolysis of 3-Alkoxy pyridinium Tetrafluoroborates. *Synlett* **1999**, *1999* (01), 93–95.
- <sup>17</sup> Ling, R.; Mariano, P. S. A Demonstration of the Synthetic Potential of Pyridinium Salt Photochemistry by Its Application to a Stereocontrolled Synthesis of (+)-Mannostatin A1. *J. Org. Chem.* **1998**, *63* (17), 6072–6076.
- <sup>18</sup> Cho, S. J.; Ling, R.; Kim, A.; Mariano, P. S. A Versatile Approach to the Synthesis of (+)-Mannostatin A Analogues. *J. Org. Chem.* **2000**, *65* (5), 1574–1577.

- 
- <sup>19</sup> Song, L.; Duesler, E. N.; Mariano, P. S. Stereoselective Synthesis of Polyhydroxylated Indolizidines Based on Pyridinium Salt Photochemistry and Ring Rearrangement Metathesis. *J. Org. Chem.* **2004**, *69* (21), 7284–7293.
- <sup>20</sup> Lu, H.; Su, Z.; Song, L.; Mariano, P. S. A Novel Approach to the Synthesis of Amino-Sugars. Routes To Selectively Protected 3-Amino-3-Deoxy-Aldopentoses Based on Pyridinium Salt Photochemistry. *J. Org. Chem.* **2002**, *67* (10), 3525–3528.
- <sup>21</sup> Zhou, J.; Gong, M.; Mariano, P. S.; Yoon, U.-C. Observations Made in Exploring a Pyridinium Salt Photochemical Approach to the Synthesis of (+)-Lactacystin. *Bulletin of the Korean Chemical Society* **2008**, *29* (1), 89–93.
- <sup>22</sup> Clark, M. A.; Goering, B. K.; Li, J.; Ganem, B. Stereoselective Synthetic Approaches to Highly Substituted Cyclopentanes via Electrophilic Additions to Mono-, Di-, and Trisubstituted Cyclopentenes. *J. Org. Chem.* **2000**, *65* (13), 4058–4069.
- <sup>23</sup> Zhao, Z.; Mariano, P. S. Application of the Photocyclization Reaction of 1,2-Cyclopenta-Fused Pyridinium Perchlorate to Formal Total Syntheses of (–)-Cephalotaxine. *Tetrahedron* **2006**, *62* (31), 7266–7273.
- <sup>24</sup> Zhao, Z.; Duesler, E.; Wang, C.; Guo, H.; Mariano, P. S. Photocyclization Reactions of Cyclohexa- and Cyclopenta-Fused Pyridinium Salts. Factors Governing Regioselectivity. *J. Org. Chem.* **2005**, *70* (21), 8508–8512.
- <sup>25</sup> D. Elliott, L.; P. Knowles, J.; S. Stacey, C.; J. Klauber, D.; I. Booker-Milburn, K. Using Batch Reactor Results to Calculate Optimal Flow Rates for the Scale-up of UV Photochemical Reactions. *Reaction Chemistry & Engineering* **2018**, *3* (1), 86–93.
- <sup>26</sup> Siopa, F.; António, J. P. M.; Afonso, C. A. M. Flow-Assisted Synthesis of Bicyclic Aziridines via Photochemical Transformation of Pyridinium Salts. *Org. Process Res. Dev.* **2018**, *22* (4), 551–556.
- <sup>27</sup> Cho, D.-W.; Mariano, P. S. Organic Synthesis Based on Ruthenium Carbene Catalyzed Metathesis Reactions and Pyridinium Salt Photochemistry. *Journal of the Korean Chemical Society* **2010**, *54* (3), 261–268.

- 
- <sup>28</sup> Glarner, F.; Acar, B.; Etter, I.; Damiano, T.; Acar, E. A.; Bernardinelli, G.; Burger, U. The Photohydration of N-Glycosylpyridinium Salts and of Related Pyridinium N,O-Acetals. *Tetrahedron* **2000**, *56* (25), 4311–4316.
- <sup>29</sup> King, R. A.; Lüthi, H. P.; Iii, H. F. S.; Glarner, F.; Burger, U. The Photohydration of N-Alkylpyridinium Salts: Theory and Experiment. *Chemistry – A European Journal* **2001**, *7* (8), 1734–1742.
- <sup>30</sup> Sowmiah, S.; S. Esperança, J. M. S.; N. Rebelo, L. P.; M. Afonso, C. A. Pyridinium Salts: From Synthesis to Reactivity and Applications. *Organic Chemistry Frontiers* **2018**, *5* (3), 453–493.
- <sup>31</sup> Damiano, T.; Morton, D.; Nelson, A. Photochemical Transformations of Pyridinium Salts: Mechanistic Studies and Applications in Synthesis. *Organic & Biomolecular Chemistry* **2007**, *5* (17), 2735–2752.
- <sup>32</sup> Zou, J.; S. Mariano, P. The Synthetic Potential of Pyridinium Salt Photochemistry. *Photochemical & Photobiological Sciences* **2008**, *7* (4), 393–404..
- <sup>33</sup> Delgado, A. Recent Advances in the Chemistry of Aminocyclitols. *European Journal of Organic Chemistry* **2008**, *2008* (23), 3893–3906.
- <sup>34</sup> Kaur, N. Synthesis of Three-Membered and Four-Membered Heterocycles with the Assistance of Photochemical Reactions. *Journal of Heterocyclic Chemistry* **2019**, *56* (4), 1141–1167.
- <sup>35</sup> Clark, M. A.; Schoenfeld, R. C.; Ganem, B. The Photochemistry of Pyrylium Salts: New Photohydrations and Photoamidations of Heterocycles Leading to Bicyclic Oxazolines and Functionalized Cyclopentenones. *J. Am. Chem. Soc.* **2001**, *123* (42), 10425–10426.
- <sup>36</sup> Wakita, K.; Tokitoh, N.; Okazaki, R.; Takagi, N.; Nagase, S. Crystal Structure of a Stable Silabenzene and Its Photochemical Valence Isomerization into the Corresponding Silabenzvalene. *J. Am. Chem. Soc.* **2000**, *122* (23), 5648–5649.
- <sup>37</sup> Su, M.-D. Mechanistic Study of the Photochemical Isomerization Reactions of Silabenzene. *Organometallics* **2014**, *33* (19), 5231–5237.
- <sup>38</sup> (a) Becke, A. D. Density-Functional Thermochemistry. III. The role of exact exchange. *J. Chem. Phys.* **1993**, *98*, 5648–5652. (b) Stephens, P.J.; Devlin, F.J.; Chabalowski, C.F.; Frisch, M.J. Ab initio



- 
- Calculation of Vibrational Absorption and Circular Dichroism Spectra Using Density Functional Theory. *J. Phys. Chem.* **1994**, *98*, 11623-11627.
- <sup>39</sup> Krishnan, R.; Binkley, J. S.; Seeger, R.; Pople Self-consistent Molecular Orbital Methods. XX. A Basis Set for Correlated Wave Functions. *J. A. J. Chem. Phys.* 1980, *72*, 650–654.
- <sup>40</sup> Marenich, A. V.; Cramer, C. J.; Truhlar, D. G. Universal solvation model based on solute electron density and on a continuum model of the solvent defined by the bulk dielectric constant and atomic surface tensions. *J. Phys. Chem. B* **2009**, *113*, 6378-6396.
- <sup>41</sup> Fifen, J. J.; Nsangou, M.; Dhaouadi, Z.; Motapon, O.; Jaidane, N.-J. Solvation Energies of the Proton in Methanol, *J. Chem. Theory Comp.* **2013**, *9*, 1173-1181.
- <sup>42</sup> Grimme, S.; Antony, J.; Ehrlich, S.; Krieg, H. A Consistent and Accurate *ab initio* Parametrization of Density Functional Dispersion Correction (DFT-D) for the 94 Elements H-Pu. *J. Chem. Phys.* **2010**, *132*, 154104.
- <sup>43</sup> IUPAC. *Compendium of Chemical Terminology, 2nd ed. (the "Gold Book")*. Compiled by A. D. McNaught and A. Wilkinson. Blackwell Scientific Publications, Oxford (1997). Online version (2019) created by S. J. Chalk. ISBN 0-9678550-9-8. <https://doi.org/10.1351/goldbook>.
- <sup>44</sup> Fdez. Galván, I.; Vacher, M.; Alavi, A.; Angeli, C.; Aquilante, F.; Autschbach, J.; Bao, J. J.; Bokarev, S. I.; Bogdanov, N. A.; Carlson, R. K.; Chibotaru, L. F.; Creutzberg, J.; Dattani, N.; Delcey, M. G.; Dong, S.; Dreuw, A.; Freitag, L.; Frutos, L. M.; Gagliardi, L.; Gendron, F.; Giussani, A.; González, L.; Grell, G.; Guo, G.; Hoyer, C. E.; Johansson, M.; Keller, S.; Knecht, S.; Kovačević, G.; Kállman, E.; Li Manni, G.; Lundberg, M.; Ma, Y.; Mai, S.; Malhado, J. P.; Malmqvist, P. Å.; Marquetand, P.; Mewes, S. A.; Norell, J.; Olivucci, M.; Oppel, M.; Phung, Q. M.; Pierloot, K.; Plasser, F.; Reiher, M.; Sand, A. M.; Schapiro, I.; Sharma, P.; Stein, C. J.; Sørensen, L. K.; Truhlar, D. G.; Ugandi, M.; Ungur, L.; Valentini, A.; Vancoillie, S.; Veryazov, V.; Weser, O.; Wesołowski, T. A.; Widmark, P.-O.; Wouters, S.; Zech, A.; Zobel, J. P.; Lindh R. OpenMolcas: From Source Code to Insight, *J. Chem. Theory Comput.* **2019**, *15*, 5925-5964.
- <sup>45</sup> Malmqvist, P.-Å.; Roos, B. O. The CASSCF state interaction method. *Chem. Phys. Lett.* **1989**, *155*, 189-194.

- 
- <sup>46</sup> Widmark, P.-O. ; Malmqvist, P.-Å.; Roos, B. O. Density Matrix Averaged Atomic Natural Orbital(ANO) Basis Sets for Correlated Molecular Functions. *Theor. Chim. Acta*, **1990**, *77*, 291-306.
- <sup>47</sup> Finleya, J.; Malmqvista, P.-Å.; Roos, B. O.; Andrés, L. S. The Multi-State CASPT2 Method. *Chem. Phys. Lett.* **1998**, *288*, 299-306.
- <sup>48</sup> Ghigo, g.; Roos, B-R. Malmqvist, P.-A. A Modified definition of the zeroth-order Hamiltonian in Multiconfigurational Perturbation Theory. *Chem. Phys. Lett.*, **2004**, *396*, 142.
- <sup>49</sup> Malmqvist, P.-Å.; Forsberg, N. Multiconfigurational Perturbation Theory with Imaginary Shift Level. *Chem. Phys. Lett.* **1997**, *274*, 196-204.
- <sup>50</sup> Sobolewski, A. L.; Woywod, C.; Domcke, W., Ab initio Investigation of Potential Energy Surfaces Involved in the Photophysics of Benzene and Pyrazine. *Chem. Phys.* **1993**, *98*, 5627-5641.
- <sup>51</sup> Wolinski, K.; Hinton, J. F.; Pulay, P. *J. Am. Chem. Soc.* **1990**, *112*, 8251–8260.
- <sup>52</sup> Aidas, K.; Angeli, C.; Bak, K. L.; Bakken, V.; Bast, R.; Boman, L.; Christiansen, O.; Cimiraglia, R.; Coriani, S.; Dahle, P.; Dalskov, E. K.; Ekström, U.; Enevoldsen, T.; Eriksen, J. J.; Ettenhuber, P.; Fernández, B.; Ferrighi, L.; Fliegl, H.; Frediani, L.; Hald, K.; Halkier, A.; Hättig, C.; Heiberg, H.; Helgaker, T.; Hennum, A. C.; Hettema, H.; Hjertenæs, E.; Høst, S.; Høyvik, I.; Iozzi, M. F.; Jansík, B.; Jensen, H. J.; Jonsson, D. ; Jørgensen, P.; Kauczor, J.; Kirpekar, S.; Kjærgaard, T.; Klopper, W.; Knecht, S.; Kobayashi, R.; Koch, H.; Kongsted, J.; Krapp, A.; Kristensen, K.; Ligabue, A.; Lutnæs, O. B.; Melo, J. I.; Mikkelsen, K. V.; Myhre, R. H.; Neiss, C.; Nielsen, C. B.; Norman, P.; Olsen, J.; Olsen, J. M.; Osted, A.; Packer, M. J.; Pawłowski, F.; Pedersen, T. B.; Provasi, P. F.; Reine, S.; Rinkevicius, Z.; Ruden, T. A.; Ruud, K.; Rybkin, V. V.; Sałek, P.; Samson; C. C.; de Merás, A. S.; Saue, T.; Sauer, S. P.; Schimmelpfennig, B.; Sneskov, K.; Steindal, A. H.; Sylvester-Hvid, K. O.; Taylor, P. R.; Teale, A. M.; Tellgren, E. I.; Tew, D. P.; Thorvaldsen, A. J.; Thøgersen, L.; Vahtras, O.; Watson, M. A.; Wilson, D. J.; Ziolkowski, M.; Ågren, H. The Dalton quantum chemistry program system. *WIREs Comput. Mol. Sci.*, **2014**, *4*, 269-284.
- <sup>53</sup> Bultinck, P.; Rafat, M.; Ponec, R.; Van Gheluwe, B.; Carbó-Dorca, R.; Popelier, P. Electron Delocalization and Aromaticity in Linear Polyacenes: Atoms in Molecules Multicenter Delocalization Index. *J. Phys. Chem. A*, **2006**, *110*, 7642-7648.

- 
- <sup>54</sup> Matito, E.; Duran, M.; Solà, M. The Aromatic Fluctuation Index (FLU): a New Aromaticity Index Based on Electron Delocalization. *J. Chem. Phys.*, **2005**, *122*, 014109.
- <sup>55</sup> AIMAll (Version 17.11.14 B) TK Gristmill Software (aim.tkgristmill.com), Overland Park KS, USA, **2018**.
- <sup>56</sup> Matito, E. ESI-3D: Electron Sharing Indexes Program for 3D Molecular Space Partitioning, Institute of Computational Chemistry and Catalysis, Girona, Catalonia, Spain, **2006**, <http://iqc.udg.es/~eduard/ESI>.
- <sup>57</sup> Turro, N. J.; Renner, C. A.; Katz, T. J.; Wiberg, K. B.; Connon, H. A. Kinetics and Thermochemistry of the Rearrangement of Benzvalene to Benzene. An Energy Sufficient but Non-Chemiluminescent Reaction. *Tetrahedron Lett.* **1976**, *17*, 4133-4136.
- <sup>58</sup> Boggio-Pasqua, M.; Groenhof, G. On the Use of Reduced Active Space in CASSCF Calculations. *Comput. Theor. Chem.*, **2014**, *1040-1041*, 6-13.
- <sup>59</sup> Dewar, J.S.; Kirschner, S. The Conversion of Benzvalene to Benzene. *J. Am. Chem. Soc.*, **1975**, *97*, 2932.
- <sup>60</sup> Freiser, B. S.; Beauchamp, J. L. Acid-base properties of molecules in excited electronic states utilizing ion cyclotron resonance spectroscopy. *J. Am. Chem. Soc.* **1977**, *99*, 3214-3225.
- <sup>61</sup> Esteves-López, N.; Dedonder-Lardeux, C.; Jouvet, C. Excited State of Protonated Benzene and Toluene. *J. Chem. Phys.* **2015**, *143*, 074303.
- <sup>62</sup> Perkampus, H. H.; Baumgarten, E. Proton-Addition Complexes of Aromatic Hydrocarbons. *Angew. Chem., Int. Ed. Engl.* **1964**, *3*, 776-783.
- <sup>63</sup> Childs, R. F.; Sakai, M.; Winstein, S. Observation and Behavior of the Pentamethylcyclopentadienylmethyl Cation. *J. Am. Chem. Soc.* **1968**, *90*, 7144-7146.
- <sup>64</sup> Olah, G. A.; Liang, G.; Jindal, S. P. Stable Carbocations. CLXXXVIII. Bicyclo[3.1.0]hexenyl Cations. *J. Org. Chem.* **1975**, *40*, 3259-3263.
- <sup>65</sup> Matito, E. An Electronic Aromaticity Index for Large Rings. *Phys. Chem. Chem. Phys.*, **2016**, *18*, 11839-11846.
- <sup>66</sup> Cyranski, M. K. Energetic Aspects of Cyclic  $\pi$ -Electron Delocalization: Evaluation of the Methods of Estimating Aromatic Stabilization Energies. *Chem. Rev.*, **2005**, *105*, 3773-3811.

- 
- <sup>67</sup> Karadakov, P. B. Aromaticity and Antiaromaticity in the Low-Lying Electronic States of Cyclooctatetraene. *J. Phys. Chem. A* **2008**, *112*, 12707-12713.
- <sup>68</sup> Jorner, K.; Jahn, B. O.; Bultinck, P.; Ottosson, H. Triplet State Homoaromaticity: Concept, Computational Validation and Experimental Relevance. *Chem. Sci.* **2018**, *9*, 3165–3176.
